# Supplementary material for: De novo identification and targeted sequencing of SSRs efficiently fingerprints Sorghum bicolor sub-population identity
Source: PLoS One. 2021 Mar 8;16(3):e0248213. doi: 10.1371/journal.pone.0248213 (PMC7939377; doi:10.1371/journal.pone.0248213)
Supplement: S4 Table — This table includes the sequencing data of the 53 accessions at Xgma1 –Xgma6 & Xunr1 –Xunr182. The chromosomal locations of the SSRs, the primers (forward and reverse) with their associated Tms, and the reference genome sequence are provided. (XLSX) [file pone.0248213.s006.xlsx]

## Sheet: SSRs
SSR Name	Chromosome	Start (bp)	Forward Primer (+)	Forward Primer Tm	Reverse Primer (-)	Reverse Primer Tm	Reference allele	Alternate allele(s)	PI226096	PI330272	PI34911	PI505722	PI506069	PI508366	PI510923	PI525695	PI533752	PI533766	PI533792	PI533834	PI533839	PI533869	PI533910	PI533991	PI534128	PI534133	PI534138	PI534155	PI536633	PI552861	PI563516	PI564019	PI564163	PI565121	PI571128	PI576130	PI576434	PI583832	PI585749	PI586430	PI597980	PI609336	PI613536	PI642992	PI642998	PI651492	PI651496	PI653617	PI655993
Xunr1	1	1211608	AACGGGACTTAATTAGGAATTTAAGATCAGTTGGTTACTG	49.644	GGTAGCTAGGGCCATGTGCCAACAGCTGCATGCAAACTCC	60.163	AGAAAGAAAGAGAAAGAAAAGAAAGA	AGAAAGAAAGAGAAAG;AGAAAGAAAGAGAAAGAAAA;AGAAAGAAAGAGAAAGAAAAGA;AGAAAGAAAGAGAAAGAAAAGAAA;AGAAAGAAAGAGAAAGAAAAGAAAG;AGAAAGAAAGAGAAAGAAAAGAAAGAA;AGAAAGAAAGAGAAAGAAAAGAAAGAAA;AGAAAGAAAGAGAAAGAAAAGAAAGAAAAGA;AGAAAGAAAGAGAAAGAAAAGAAAGAAAAGAA;AGAAAGAAAGAGAAAGAAAAGAAAGAAAAGAAAGAA;AGAAAGAAAGAGAAAGAAAAGAAAGAAAAGAAAGAAAGAA;AGAAAGAAAGAGAAAGAAAAGAAAGAAAAGAAAGAAAGAAAGAA;AGAAAGAAAGAGAAAGAAAAGAAAGAAAAGAAAGAAAGAAAG…	AGAAAGAAAGAGAAAGAAAAGAAAGAAAAGAA/AGAAAGAAAGAGAAAGAAAAGAAAGAAAAGAA	AGAAAGAAAGAGAAAGAAAAGAAAGA/AGAAAGAAAGAGAAAGAAAAGAAAGA	AGAAAGAAAGAGAAAGAAAAGAAAGA/AGAAAGAAAGAGAAAGAAAAGAAAGA	AGAAAGAAAGAGAAAGAAAAGAAAGA/AGAAAGAAAGAGAAAGAAAAGAAAGA	AGAAAGAAAGAGAAAGAAAAGAAAGA/AGAAAGAAAGAGAAAGAAAAGAAAGA	AGAAAGAAAGAGAAAGAAAAGAAAGA/AGAAAGAAAGAGAAAGAAAAGAAAGA	AGAAAGAAAGAGAAAGAAAAGAAAGA/AGAAAGAAAGAGAAAGAAAAGAAAGA	AGAAAGAAAGAGAAAGAAAAGAAAGA/AGAAAGAAAGAGAAAGAAAAGAAAGA	AGAAAGAAAGAGAAAGAAAAGAAAGA/AGAAAGAAAGAGAAAGAAAAGAAAGA	AGAAAGAAAGAGAAAG/AGAAAGAAAGAGAAAG	AGAAAGAAAGAGAAAGAAAAGAAAGA/AGAAAGAAAGAGAAAGAAAAGAAAGA	AGAAAGAAAGAGAAAGAAAAGAAAGA/AGAAAGAAAGAGAAAGAAAAGAAAGA	AGAAAGAAAGAGAAAG/AGAAAGAAAGAGAAAG	AGAAAGAAAGAGAAAGAAAAGAAAGA/AGAAAGAAAGAGAAAGAAAAGAAAGA	AGAAAGAAAGAGAAAGAAAAGAAAGA/AGAAAGAAAGAGAAAGAAAAGAAAGA	AGAAAGAAAGAGAAAGAAAAGAAAGA/AGAAAGAAAGAGAAAGAAAAGAAAGA	AGAAAGAAAGAGAAAGAAAAGAAAGA/AGAAAGAAAGAGAAAGAAAAGAAAGA	AGAAAGAAAGAGAAAGAAAAGAAAGA/AGAAAGAAAGAGAAAGAAAAGAAAGA	AGAAAGAAAGAGAAAGAAAAGAAAGAAAAGAAAGAAAGAAAGAA/AGAAAGAAAGAGAAAGAAAAGAAAGAAAAGAAAGAAAGAAAGAA	AGAAAGAAAGAGAAAGAAAAGAAAGA/AGAAAGAAAGAGAAAGAAAAGAAAGA	AGAAAGAAAGAGAAAGAAAAGAAAGA/AGAAAGAAAGAGAAAGAAAAGAAAGA	AGAAAGAAAGAGAAAGAAAAGAAAGA/AGAAAGAAAGAGAAAGAAAAGAAAGA	AGAAAGAAAGAGAAAGAAAAGAAAGA/AGAAAGAAAGAGAAAGAAAAGAAAGA	AGAAAGAAAGAGAAAGAAAAGAAAGA/AGAAAGAAAGAGAAAGAAAAGAAAGA	AGAAAGAAAGAGAAAGAAAAGAAAGA/AGAAAGAAAGAGAAAGAAAAGAAAGA	AGAAAGAAAGAGAAAGAAAAGAAAGA/AGAAAGAAAGAGAAAGAAAAGAAAGA	AGAAAGAAAGAGAAAGAAAAGAAAGA/AGAAAGAAAGAGAAAGAAAAGAAAGA	AGAAAGAAAGAGAAAGAAAAGAAAGA/AGAAAGAAAGAGAAAGAAAAGAAAGA	AGAAAGAAAGAGAAAGAAAAGAAAGA/AGAAAGAAAGAGAAAGAAAAGAAAGA	AGAAAGAAAGAGAAAGAAAAGAAAGA/AGAAAGAAAGAGAAAGAAAAGAAAGA	AGAAAGAAAGAGAAAGAAAAGAAAGA/AGAAAGAAAGAGAAAGAAAAGAAAGA	AGAAAGAAAGAGAAAGAAAAGAAAGA/AGAAAGAAAGAGAAAGAAAAGAAAGA	AGAAAGAAAGAGAAAGAAAAGAAAGA/AGAAAGAAAGAGAAAGAAAAGAAAGA	AGAAAGAAAGAGAAAGAAAAGAAAGA/AGAAAGAAAGAGAAAGAAAAGAAAGA	AGAAAGAAAGAGAAAGAAAAGAAAGA/AGAAAGAAAGAGAAAGAAAAGAAAGA	AGAAAGAAAGAGAAAGAAAAGAAAGA/AGAAAGAAAGAGAAAGAAAAGAAAGA	AGAAAGAAAGAGAAAGAAAAGAAAGAAAAGAA/AGAAAGAAAGAGAAAGAAAAGAAAGAAAAGAA	AGAAAGAAAGAGAAAGAAAAGA/AGAAAGAAAGAGAAAGAAAAGAAAGAAAAGAAAGAAAGAAAGAAAGAAAGAA	AGAAAGAAAGAGAAAGAAAAGAAAGA/AGAAAGAAAGAGAAAGAAAAGAAAGA	AGAAAGAAAGAGAAAGAAAAGAAAGA/AGAAAGAAAGAGAAAGAAAAGAAAGA	AGAAAGAAAGAGAAAGAAAAGAAAGA/AGAAAGAAAGAGAAAGAAAAGAAAGA
Xunr2	1	1722477	GCGAGGAAGAGCTCCTCCTTTCTTCCTCGCGTTACACACC	59.145	AACAGGCAGCTATATATTTCCCTGGCCATGCACAAAGCAG	56.172	GGATTGGATTGGATTGG	GGATTGGATTGG;GGATTGGATTGGATTGGATTGG;GGATTGGATTGGATTGGATTGGATTGG	GGATTGGATTGGATTGGATTGGATTGG/GGATTGGATTGGATTGGATTGGATTGG	GGATTGGATTGGATTGG/GGATTGGATTGGATTGGATTGG	GGATTGGATTGGATTGG/GGATTGGATTGGATTGG	GGATTGGATTGGATTGG/GGATTGGATTGGATTGG	GGATTGGATTGGATTGG/GGATTGGATTGGATTGG	GGATTGGATTGGATTGG/GGATTGGATTGGATTGG	GGATTGGATTGGATTGG/GGATTGGATTGGATTGG	./.	GGATTGGATTGGATTGG/GGATTGGATTGGATTGG	GGATTGGATTGGATTGG/GGATTGGATTGGATTGG	GGATTGGATTGGATTGG/GGATTGGATTGGATTGG	GGATTGGATTGGATTGG/GGATTGGATTGGATTGG	GGATTGGATTGGATTGG/GGATTGGATTGGATTGG	GGATTGGATTGGATTGG/GGATTGGATTGGATTGG	GGATTGGATTGGATTGG/GGATTGGATTGGATTGG	GGATTGGATTGGATTGG/GGATTGGATTGGATTGG	GGATTGGATTGGATTGG/GGATTGGATTGGATTGG	GGATTGGATTGGATTGG/GGATTGGATTGGATTGG	GGATTGGATTGGATTGG/GGATTGGATTGGATTGG	./.	GGATTGGATTGGATTGG/GGATTGGATTGGATTGG	GGATTGGATTGGATTGG/GGATTGGATTGGATTGG	GGATTGGATTGGATTGG/GGATTGGATTGGATTGG	GGATTGGATTGGATTGG/GGATTGGATTGGATTGGATTGG	GGATTGGATTGGATTGG/GGATTGGATTGGATTGG	GGATTGGATTGGATTGG/GGATTGGATTGGATTGG	GGATTGGATTGGATTGG/GGATTGGATTGGATTGG	GGATTGGATTGGATTGG/GGATTGGATTGGATTGG	GGATTGGATTGGATTGG/GGATTGGATTGGATTGG	GGATTGGATTGGATTGG/GGATTGGATTGGATTGG	GGATTGGATTGGATTGG/GGATTGGATTGGATTGG	GGATTGGATTGGATTGG/GGATTGGATTGGATTGG	GGATTGGATTGGATTGG/GGATTGGATTGGATTGG	GGATTGGATTGGATTGG/GGATTGGATTGGATTGG	GGATTGGATTGGATTGG/GGATTGGATTGGATTGG	GGATTGGATTGGATTGG/GGATTGGATTGGATTGG	GGATTGGATTGGATTGG/GGATTGGATTGGATTGG	GGATTGGATTGGATTGG/GGATTGGATTGGATTGG	GGATTGGATTGGATTGG/GGATTGGATTGGATTGG	GGATTGGATTGGATTGG/GGATTGGATTGGATTGG	GGATTGGATTGGATTGG/GGATTGGATTGGATTGG
Xgma1	1	3295349	TCGGTCGTGCCGGGAAGGGGGACTGGAGGGTAGGGTCTGG	64.285	CCCAACCGCAACAGACCAAACCCAGCCGCAACCGCAGAGC	64.145	GCGGCGGCGGCTGCGGCGGCGGCGGCGGCGGCGGCG	GCGGCGGCGG;GCGGCGGCGGCT;GCGGCGGCGGCTG;GCGGCGGCGGCTGC;GCGGCGGCGGCTGCG;GCGGCGGCGGCTGCGGCG;GCGGCGGCGGCTGCGGCGGCGGCGGCG;GCGGCGGCGGCTGCGGCGGCGGCGGCGGCG;GCGGCGGCGGCTGCGGCGGCGGCGGCGGCGGCG;GCGGCGGCGGCTGCGGCGGCGGCGGCGGCGGCGGCGGCG;GCGGCGGCGGCTGCGGCGGCGGCGGCGGCGGCGGCGGCGGCGGCGGCGGCGGCGGCGGCGGCGG	GCGGCGGCGGCTG/GCGGCGGCGGCTGCGGCGGCGGCGGCG	GCGGCGGCGGCTGCGGCGGCGGCGGCGGCGGCGGCG/GCGGCGGCGGCTGCGGCGGCGGCGGCGGCGGCGGCG	GCGGCGGCGGCTGCGGCGGCGGCGGCGGCGGCGGCG/GCGGCGGCGGCTGCGGCGGCGGCGGCGGCGGCGGCG	GCGGCGGCGGCTGCGGCGGCGGCGGCGGCG/GCGGCGGCGGCTGCGGCGGCGGCGGCGGCGGCG	GCGGCGGCGGCTGCGGCGGCGGCGGCGGCGGCG/GCGGCGGCGGCTGCGGCGGCGGCGGCGGCGGCG	GCGGCGGCGGCT/GCGGCGGCGGCTGCGGCGGCGGCGGCGGCG	GCGGCGGCGGCTGCGGCGGCGGCGGCGGCGGCGGCG/GCGGCGGCGGCTGCGGCGGCGGCGGCGGCGGCGGCG	GCGGCGGCGG/GCGGCGGCGGCTG	GCGGCGGCGGCTGCGGCGGCGGCGGCGGCGGCGGCG/GCGGCGGCGGCTGCGGCGGCGGCGGCGGCGGCGGCG	GCGGCGGCGG/GCGGCGGCGGCTGCGGCGGCGGCGGCGGCGGCG	GCGGCGGCGGCTGC/GCGGCGGCGGCTGCGGCGGCGGCGGCGGCGGCGGCG	GCGGCGGCGGCTGCG/GCGGCGGCGGCTGCG	GCGGCGGCGGCTG/GCGGCGGCGGCTG	GCGGCGGCGGCTGCGGCGGCGGCGGCGGCGGCG/GCGGCGGCGGCTGCGGCGGCGGCGGCGGCGGCG	GCGGCGGCGGCTGCGGCGGCGGCGGCGGCGGCGGCG/GCGGCGGCGGCTGCGGCGGCGGCGGCGGCGGCGGCG	GCGGCGGCGGCTGCG/GCGGCGGCGGCTGCGGCGGCGGCGGCGGCGGCGGCG	GCGGCGGCGGCTGCGGCGGCGGCGGCGGCGGCGGCG/GCGGCGGCGGCTGCGGCGGCGGCGGCGGCGGCGGCG	GCGGCGGCGGCTGCGGCGGCGGCGGCGGCGGCGGCG/GCGGCGGCGGCTGCGGCGGCGGCGGCGGCGGCGGCG	GCGGCGGCGGCTGCGGCGGCGGCGGCGGCGGCGGCG/GCGGCGGCGGCTGCGGCGGCGGCGGCGGCGGCGGCG	GCGGCGGCGGCTGCGGCGGCGGCGGCGGCGGCGGCG/GCGGCGGCGGCTGCGGCGGCGGCGGCGGCGGCGGCG	GCGGCGGCGGCTGCGGCGGCGGCGGCGGCGGCGGCG/GCGGCGGCGGCTGCGGCGGCGGCGGCGGCGGCGGCG	GCGGCGGCGGCTGCGGCGGCGGCGGCGGCGGCGGCG/GCGGCGGCGGCTGCGGCGGCGGCGGCGGCGGCGGCG	GCGGCGGCGGCTGCGGCGGCGGCGGCGGCGGCGGCG/GCGGCGGCGGCTGCGGCGGCGGCGGCGGCGGCGGCG	GCGGCGGCGGCTGCG/GCGGCGGCGGCTGCGGCGGCGGCGGCGGCGGCGGCG	GCGGCGGCGGCTGCGGCGGCGGCGGCGGCGGCGGCG/GCGGCGGCGGCTGCGGCGGCGGCGGCGGCGGCGGCG	GCGGCGGCGGCTGCGGCGGCGGCGGCGGCGGCGGCG/GCGGCGGCGGCTGCGGCGGCGGCGGCGGCGGCGGCG	GCGGCGGCGGCTGCG/GCGGCGGCGGCTGCGGCGGCGGCGGCGGCGGCGGCG	GCGGCGGCGGCTGCGGCGGCGGCGGCGGCGGCGGCG/GCGGCGGCGGCTGCGGCGGCGGCGGCGGCGGCGGCG	GCGGCGGCGGCTGCG/GCGGCGGCGGCTGCG	GCGGCGGCGGCTGCG/GCGGCGGCGGCTGCG	GCGGCGGCGGCTGCGGCGGCGGCGGCGGCGGCGGCG/GCGGCGGCGGCTGCGGCGGCGGCGGCGGCGGCGGCG	GCGGCGGCGGCTG/GCGGCGGCGGCTG	GCGGCGGCGGCTGCG/GCGGCGGCGGCTGCGGCGGCGGCGGCGGCGGCG	GCGGCGGCGGCTGCGGCGGCGGCGGCGGCGGCGGCG/GCGGCGGCGGCTGCGGCGGCGGCGGCGGCGGCGGCG	GCGGCGGCGGCTGCG/GCGGCGGCGGCTGCG	GCGGCGGCGGCTGCGGCGGCGGCGGCGGCGGCGGCG/GCGGCGGCGGCTGCGGCGGCGGCGGCGGCGGCGGCG	GCGGCGGCGGCTGCGGCGGCGGCGGCG/GCGGCGGCGGCTGCGGCGGCGGCGGCG	GCGGCGGCGGCTGCGGCGGCGGCGGCGGCGGCGGCG/GCGGCGGCGGCTGCGGCGGCGGCGGCGGCGGCGGCG	GCGGCGGCGGCTGCG/GCGGCGGCGGCTGCG	GCGGCGGCGGCTGCG/GCGGCGGCGGCTGCGGCGGCGGCGGCGGCGGCG	GCGGCGGCGGCTGCG/GCGGCGGCGGCTGCGGCGGCGGCGGCGGCGGCG
Xunr3	1	3358087	CGTCGCCCCTGTACGCCCGCGCCCAGTAGTCGTCGAACTC	64.978	GCACAAAAACCCTAACCTAAGCGCTCTTGTGCTCGGACCC	58.939	CCTCCTCTTCCTCCTCCTCCTCC	CCTCCTCTTCCTCCTCCTCC;CCTCCTCTTCCTCCTCCTCCTCCTCC;CCTCCTCTTCCTCCTCCTCCTCCTCCTCC;CCTCCTCTTCCTCCTCCTCCTCCTCCTCCTCC;CCTCCTCTTCCTCCTCCTCCTCCTCCTCCTCCTCCTCC	CCTCCTCTTCCTCCTCCTCCTCCTCCTCCTCCTCCTCC/CCTCCTCTTCCTCCTCCTCCTCCTCCTCCTCCTCCTCC	CCTCCTCTTCCTCCTCCTCC/CCTCCTCTTCCTCCTCCTCCTCCTCC	CCTCCTCTTCCTCCTCCTCCTCC/CCTCCTCTTCCTCCTCCTCCTCC	CCTCCTCTTCCTCCTCCTCCTCC/CCTCCTCTTCCTCCTCCTCCTCC	CCTCCTCTTCCTCCTCCTCCTCC/CCTCCTCTTCCTCCTCCTCCTCC	CCTCCTCTTCCTCCTCCTCCTCC/CCTCCTCTTCCTCCTCCTCCTCC	CCTCCTCTTCCTCCTCCTCCTCC/CCTCCTCTTCCTCCTCCTCCTCC	CCTCCTCTTCCTCCTCCTCCTCC/CCTCCTCTTCCTCCTCCTCCTCC	CCTCCTCTTCCTCCTCCTCCTCC/CCTCCTCTTCCTCCTCCTCCTCC	CCTCCTCTTCCTCCTCCTCCTCC/CCTCCTCTTCCTCCTCCTCCTCC	CCTCCTCTTCCTCCTCCTCCTCC/CCTCCTCTTCCTCCTCCTCCTCC	CCTCCTCTTCCTCCTCCTCCTCC/CCTCCTCTTCCTCCTCCTCCTCC	CCTCCTCTTCCTCCTCCTCCTCC/CCTCCTCTTCCTCCTCCTCCTCC	CCTCCTCTTCCTCCTCCTCCTCC/CCTCCTCTTCCTCCTCCTCCTCC	CCTCCTCTTCCTCCTCCTCCTCC/CCTCCTCTTCCTCCTCCTCCTCC	CCTCCTCTTCCTCCTCCTCCTCC/CCTCCTCTTCCTCCTCCTCCTCC	CCTCCTCTTCCTCCTCCTCCTCCTCCTCC/CCTCCTCTTCCTCCTCCTCCTCCTCCTCCTCC	CCTCCTCTTCCTCCTCCTCCTCC/CCTCCTCTTCCTCCTCCTCCTCC	CCTCCTCTTCCTCCTCCTCCTCC/CCTCCTCTTCCTCCTCCTCCTCC	CCTCCTCTTCCTCCTCCTCCTCC/CCTCCTCTTCCTCCTCCTCCTCC	CCTCCTCTTCCTCCTCCTCCTCC/CCTCCTCTTCCTCCTCCTCCTCC	CCTCCTCTTCCTCCTCCTCCTCC/CCTCCTCTTCCTCCTCCTCCTCC	CCTCCTCTTCCTCCTCCTCCTCC/CCTCCTCTTCCTCCTCCTCCTCC	CCTCCTCTTCCTCCTCCTCCTCC/CCTCCTCTTCCTCCTCCTCCTCC	CCTCCTCTTCCTCCTCCTCCTCC/CCTCCTCTTCCTCCTCCTCCTCC	CCTCCTCTTCCTCCTCCTCCTCC/CCTCCTCTTCCTCCTCCTCCTCC	CCTCCTCTTCCTCCTCCTCCTCC/CCTCCTCTTCCTCCTCCTCCTCC	CCTCCTCTTCCTCCTCCTCCTCC/CCTCCTCTTCCTCCTCCTCCTCC	CCTCCTCTTCCTCCTCCTCCTCC/CCTCCTCTTCCTCCTCCTCCTCC	CCTCCTCTTCCTCCTCCTCCTCC/CCTCCTCTTCCTCCTCCTCCTCC	CCTCCTCTTCCTCCTCCTCCTCC/CCTCCTCTTCCTCCTCCTCCTCC	CCTCCTCTTCCTCCTCCTCCTCC/CCTCCTCTTCCTCCTCCTCCTCC	CCTCCTCTTCCTCCTCCTCCTCC/CCTCCTCTTCCTCCTCCTCCTCC	CCTCCTCTTCCTCCTCCTCCTCC/CCTCCTCTTCCTCCTCCTCCTCC	CCTCCTCTTCCTCCTCCTCCTCC/CCTCCTCTTCCTCCTCCTCCTCC	CCTCCTCTTCCTCCTCCTCCTCC/CCTCCTCTTCCTCCTCCTCCTCC	CCTCCTCTTCCTCCTCCTCCTCC/CCTCCTCTTCCTCCTCCTCCTCC	CCTCCTCTTCCTCCTCCTCCTCC/CCTCCTCTTCCTCCTCCTCCTCC	CCTCCTCTTCCTCCTCCTCC/CCTCCTCTTCCTCCTCCTCCTCCTCC	CCTCCTCTTCCTCCTCCTCCTCC/CCTCCTCTTCCTCCTCCTCCTCC	CCTCCTCTTCCTCCTCCTCCTCC/CCTCCTCTTCCTCCTCCTCCTCC
Xgma2	1	9033349	GGTCGAGGGCTCCTCTCTCTCTACCGTCCCCGCTCGATCC	62.049	GGCAGCGCGACGATAGGCGCGAGTTGGACTGGCGGAGAGC	65.595	GCCGCCGCCGCCGCCGCCGCCGCC	GCCGCCGCC;GCCGCCGCCGCC;GCCGCCGCCGCCGCC;GCCGCCGCCGCCGCCGCC;GCCGCCGCCGCCGCCGCCGCC;GCCGCCGCCGCCGCCGCCGCCGCCGCCGCC	GCCGCCGCCGCC/GCCGCCGCCGCC	GCCGCCGCCGCCGCCGCCGCCGCC/GCCGCCGCCGCCGCCGCCGCCGCC	GCCGCCGCCGCCGCCGCCGCC/GCCGCCGCCGCCGCCGCCGCCGCC	GCCGCCGCCGCCGCCGCCGCCGCC/GCCGCCGCCGCCGCCGCCGCCGCC	GCCGCCGCCGCCGCCGCCGCCGCC/GCCGCCGCCGCCGCCGCCGCCGCC	GCCGCCGCCGCCGCCGCCGCCGCC/GCCGCCGCCGCCGCCGCCGCCGCC	GCCGCCGCCGCCGCCGCCGCCGCC/GCCGCCGCCGCCGCCGCCGCCGCC	GCCGCCGCCGCCGCCGCCGCCGCCGCCGCC/GCCGCCGCCGCCGCCGCCGCCGCCGCCGCC	GCCGCCGCCGCCGCCGCCGCCGCC/GCCGCCGCCGCCGCCGCCGCCGCC	GCCGCCGCCGCCGCCGCCGCCGCC/GCCGCCGCCGCCGCCGCCGCCGCC	GCCGCCGCCGCCGCCGCCGCCGCC/GCCGCCGCCGCCGCCGCCGCCGCC	GCCGCCGCCGCCGCCGCCGCCGCC/GCCGCCGCCGCCGCCGCCGCCGCC	GCCGCCGCCGCCGCCGCCGCCGCC/GCCGCCGCCGCCGCCGCCGCCGCCGCCGCC	GCCGCCGCCGCCGCCGCCGCCGCC/GCCGCCGCCGCCGCCGCCGCCGCC	GCCGCCGCCGCCGCCGCCGCCGCC/GCCGCCGCCGCCGCCGCCGCCGCC	GCCGCCGCCGCCGCCGCCGCCGCC/GCCGCCGCCGCCGCCGCCGCCGCC	GCCGCCGCCGCCGCCGCCGCCGCC/GCCGCCGCCGCCGCCGCCGCCGCC	GCCGCCGCCGCCGCCGCCGCCGCC/GCCGCCGCCGCCGCCGCCGCCGCC	GCCGCCGCC/GCCGCCGCCGCCGCCGCCGCC	GCCGCCGCCGCC/GCCGCCGCCGCC	GCCGCCGCCGCCGCCGCCGCCGCC/GCCGCCGCCGCCGCCGCCGCCGCC	GCCGCCGCCGCCGCCGCCGCCGCC/GCCGCCGCCGCCGCCGCCGCCGCC	GCCGCCGCCGCCGCCGCCGCCGCC/GCCGCCGCCGCCGCCGCCGCCGCC	GCCGCCGCCGCCGCCGCCGCCGCC/GCCGCCGCCGCCGCCGCCGCCGCC	GCCGCCGCCGCCGCCGCCGCCGCC/GCCGCCGCCGCCGCCGCCGCCGCC	GCCGCCGCCGCCGCCGCCGCCGCC/GCCGCCGCCGCCGCCGCCGCCGCC	GCCGCCGCCGCCGCCGCCGCCGCC/GCCGCCGCCGCCGCCGCCGCCGCC	GCCGCCGCCGCCGCCGCCGCCGCC/GCCGCCGCCGCCGCCGCCGCCGCC	GCCGCCGCCGCCGCCGCCGCC/GCCGCCGCCGCCGCCGCCGCCGCC	GCCGCCGCCGCCGCCGCCGCC/GCCGCCGCCGCCGCCGCCGCCGCC	GCCGCCGCCGCCGCCGCCGCC/GCCGCCGCCGCCGCCGCCGCCGCC	GCCGCCGCCGCCGCCGCCGCCGCCGCCGCC/GCCGCCGCCGCCGCCGCCGCCGCCGCCGCC	GCCGCCGCCGCCGCCGCCGCCGCC/GCCGCCGCCGCCGCCGCCGCCGCC	GCCGCCGCCGCCGCCGCCGCCGCC/GCCGCCGCCGCCGCCGCCGCCGCC	GCCGCCGCCGCCGCCGCCGCCGCC/GCCGCCGCCGCCGCCGCCGCCGCC	GCCGCCGCCGCCGCCGCCGCCGCC/GCCGCCGCCGCCGCCGCCGCCGCC	GCCGCCGCCGCC/GCCGCCGCCGCC	GCCGCCGCCGCCGCCGCCGCCGCC/GCCGCCGCCGCCGCCGCCGCCGCC	GCCGCCGCCGCCGCCGCCGCCGCC/GCCGCCGCCGCCGCCGCCGCCGCC	GCCGCCGCCGCCGCCGCCGCC/GCCGCCGCCGCCGCCGCCGCCGCC	GCCGCCGCCGCCGCCGCCGCCGCC/GCCGCCGCCGCCGCCGCCGCCGCC
Xunr4	1	15315585	CGCTCGTCTACAGCGGCTTCAGCGGTGGCCGTGGGATGAG	64.146	ATCCGGCGCCAAAATTGCCCAGATGAGGCGGCAGCATGTC	62.718	CAGCACCAGCACCAGCACCAGCACCAGCGCCAGC	CAGCACCAGCACCAGC;CAGCACCAGCACCAGCACCAGC;CAGCACCAGCACCAGCACCAGCACCAGC;CAGCACCAGCACCAGCACCAGCACCAGCGCCAG;CAGCACCAGCACCAGCACCAGCACCAGCGCCAGCACCAG;CAGCACCAGCACCAGCACCAGCACCAGCGCCAGCACCAGC;CAGCACCAGCACCAGCACCAGCACCAGCGCCAGCACCAGCACCAGC	CAGCACCAGCACCAGCACCAGCACCAGC/CAGCACCAGCACCAGCACCAGCACCAGC	CAGCACCAGCACCAGCACCAGC/CAGCACCAGCACCAGCACCAGC	CAGCACCAGCACCAGCACCAGCACCAGCGCCAGC/CAGCACCAGCACCAGCACCAGCACCAGCGCCAGC	CAGCACCAGCACCAGCACCAGC/CAGCACCAGCACCAGCACCAGC	CAGCACCAGCACCAGCACCAGCACCAGCGCCAGC/CAGCACCAGCACCAGCACCAGCACCAGCGCCAGC	CAGCACCAGCACCAGCACCAGC/CAGCACCAGCACCAGCACCAGC	CAGCACCAGCACCAGCACCAGC/CAGCACCAGCACCAGCACCAGC	CAGCACCAGCACCAGC/CAGCACCAGCACCAGC	CAGCACCAGCACCAGCACCAGCACCAGCGCCAGC/CAGCACCAGCACCAGCACCAGCACCAGCGCCAGC	CAGCACCAGCACCAGCACCAGCACCAGCGCCAGC/CAGCACCAGCACCAGCACCAGCACCAGCGCCAGC	CAGCACCAGCACCAGCACCAGCACCAGCGCCAGC/CAGCACCAGCACCAGCACCAGCACCAGCGCCAGC	CAGCACCAGCACCAGCACCAGC/CAGCACCAGCACCAGCACCAGC	CAGCACCAGCACCAGC/CAGCACCAGCACCAGC	CAGCACCAGCACCAGCACCAGCACCAGC/CAGCACCAGCACCAGCACCAGCACCAGC	./.	CAGCACCAGCACCAGCACCAGCACCAGCGCCAGC/CAGCACCAGCACCAGCACCAGCACCAGCGCCAGC	CAGCACCAGCACCAGCACCAGCACCAGCGCCAGC/CAGCACCAGCACCAGCACCAGCACCAGCGCCAGC	CAGCACCAGCACCAGCACCAGCACCAGCGCCAGC/CAGCACCAGCACCAGCACCAGCACCAGCGCCAGC	CAGCACCAGCACCAGCACCAGCACCAGCGCCAGC/CAGCACCAGCACCAGCACCAGCACCAGCGCCAGC	CAGCACCAGCACCAGC/CAGCACCAGCACCAGC	CAGCACCAGCACCAGCACCAGCACCAGCGCCAGC/CAGCACCAGCACCAGCACCAGCACCAGCGCCAGC	CAGCACCAGCACCAGCACCAGC/CAGCACCAGCACCAGCACCAGC	CAGCACCAGCACCAGCACCAGCACCAGCGCCAGC/CAGCACCAGCACCAGCACCAGCACCAGCGCCAGC	CAGCACCAGCACCAGCACCAGCACCAGCGCCAGC/CAGCACCAGCACCAGCACCAGCACCAGCGCCAGC	CAGCACCAGCACCAGCACCAGCACCAGCGCCAGC/CAGCACCAGCACCAGCACCAGCACCAGCGCCAGC	CAGCACCAGCACCAGCACCAGCACCAGCGCCAGC/CAGCACCAGCACCAGCACCAGCACCAGCGCCAGC	CAGCACCAGCACCAGCACCAGCACCAGCGCCAGC/CAGCACCAGCACCAGCACCAGCACCAGCGCCAGC	CAGCACCAGCACCAGCACCAGCACCAGCGCCAGC/CAGCACCAGCACCAGCACCAGCACCAGCGCCAGC	CAGCACCAGCACCAGCACCAGCACCAGCGCCAGC/CAGCACCAGCACCAGCACCAGCACCAGCGCCAGC	CAGCACCAGCACCAGCACCAGCACCAGCGCCAGC/CAGCACCAGCACCAGCACCAGCACCAGCGCCAGC	CAGCACCAGCACCAGCACCAGCACCAGC/CAGCACCAGCACCAGCACCAGCACCAGC	CAGCACCAGCACCAGC/CAGCACCAGCACCAGC	CAGCACCAGCACCAGCACCAGCACCAGCGCCAGC/CAGCACCAGCACCAGCACCAGCACCAGCGCCAGC	CAGCACCAGCACCAGCACCAGCACCAGCGCCAGC/CAGCACCAGCACCAGCACCAGCACCAGCGCCAGC	CAGCACCAGCACCAGCACCAGCACCAGCGCCAGC/CAGCACCAGCACCAGCACCAGCACCAGCGCCAGC	CAGCACCAGCACCAGCACCAGCACCAGCGCCAGC/CAGCACCAGCACCAGCACCAGCACCAGCGCCAGC	CAGCACCAGCACCAGCACCAGCACCAGC/CAGCACCAGCACCAGCACCAGCACCAGC	CAGCACCAGCACCAGCACCAGC/CAGCACCAGCACCAGCACCAGC	CAGCACCAGCACCAGCACCAGC/CAGCACCAGCACCAGCACCAGC	CAGCACCAGCACCAGCACCAGC/CAGCACCAGCACCAGCACCAGCACCAGCGCCAGC	CAGCACCAGCACCAGCACCAGCACCAGCGCCAGC/CAGCACCAGCACCAGCACCAGCACCAGCGCCAGC
Xunr5	1	25480612	GTCGTCGTCGCTGGAGCCGTCGGCGCGCGAGCTCGACCAG	67.738	CAGCCTCGGCGGCAGCCATGACGGCGGCGTCGGCGGCCGC	71.902	CCGTGGCGGTGGCCGTGGCCG	CCGTGGCGG;CCGTGGCGGTGGCCGTGGCCGTGGCCG	./.	./.	CCGTGGCGGTGGCCGTGGCCG/CCGTGGCGGTGGCCGTGGCCG	./.	CCGTGGCGGTGGCCGTGGCCG/CCGTGGCGGTGGCCGTGGCCG	./.	./.	./.	CCGTGGCGGTGGCCGTGGCCG/CCGTGGCGGTGGCCGTGGCCG	./.	./.	CCGTGGCGGTGGCCGTGGCCG/CCGTGGCGGTGGCCGTGGCCG	./.	./.	./.	./.	./.	./.	./.	./.	./.	CCGTGGCGGTGGCCGTGGCCG/CCGTGGCGGTGGCCGTGGCCG	CCGTGGCGGTGGCCGTGGCCG/CCGTGGCGGTGGCCGTGGCCG	./.	./.	CCGTGGCGGTGGCCGTGGCCG/CCGTGGCGGTGGCCGTGGCCG	./.	CCGTGGCGGTGGCCGTGGCCG/CCGTGGCGGTGGCCGTGGCCG	./.	./.	./.	./.	./.	./.	./.	./.	CCGTGGCGG/CCGTGGCGG	CCGTGGCGGTGGCCGTGGCCG/CCGTGGCGGTGGCCGTGGCCG	./.	CCGTGGCGGTGGCCGTGGCCG/CCGTGGCGGTGGCCGTGGCCG	./.
Xunr6	1	29946360	AACAATATATTATGCATGATTTGTCTTGGAGTTAGCATCG	49.318	TCCGGTACGTCGTCTCGATCTCCACTGTGTTCACCCTTGC	59.688	ATATATATATATATAT	ATATATATATATAT;ATATATATATATATATAT;ATATATATATATATATATAT;ATATATATATATATATATATAT;ATATATATATATATATATATATATATATATATATATATATATATATATATATATA	./.	ATATATATATATATAT/ATATATATATATATATAT	./.	ATATATATATATAT/ATATATATATATATAT	ATATATATATATAT/ATATATATATATATAT	ATATATATATATAT/ATATATATATATATAT	ATATATATATATATAT/ATATATATATATATAT	ATATATATATATATAT/ATATATATATATATAT	./.	ATATATATATATAT/ATATATATATATATAT	./.	ATATATATATATATAT/ATATATATATATATAT	./.	ATATATATATATATAT/ATATATATATATATATAT	./.	./.	ATATATATATATAT/ATATATATATATATAT	ATATATATATATAT/ATATATATATATATAT	./.	ATATATATATATAT/ATATATATATATATAT	ATATATATATATAT/ATATATATATATATAT	./.	ATATATATATATAT/ATATATATATATATAT	ATATATATATATAT/ATATATATATATATAT	ATATATATATATAT/ATATATATATATATAT	ATATATATATATATATAT/ATATATATATATATATAT	./.	./.	./.	ATATATATATATAT/ATATATATATATATAT	./.	ATATATATATATATAT/ATATATATATATATATAT	./.	ATATATATATATAT/ATATATATATATATAT	./.	ATATATATATATATATATATAT/ATATATATATATATATATATAT	ATATATATATATATATATAT/ATATATATATATATATATAT	./.	./.	ATATATATATATATATAT/ATATATATATATATATATAT	ATATATATATATAT/ATATATATATATATAT
Xunr7	1	32399082	CAACGATAATGGCAGAAATAACCAACCCCGGAAACTCTGC	55.61	GTTTTTCATTAACCACGTACTACTAGCCCAATCATCAAGG	51.593	GATAGATAGATAGATAGATAGATAGATAG	GATAGATAGATAGATAGATAGATAGATAG;GATAGATAGATAGATAG;GATAGATAGATAGATAGATAG;GATAGATAGATAGATAGATAGATAG;GATAGATAGATAGATAGATAGATAGA;GATAGATAGATAGATAGATAGATAGATAGATAG;GATAGATAGATAGATAGATAGATAGATAGATAGATAG;GATAGATAGATAGATAGATAGATAGATAGATAGATAGATAG;GATAGATAGATAGATAGATAGATAGATAGATAGATAGATAGATAG;GATAGATAGATAGATAGATAGATAGATAGATAGATAGATAGATAGATAG;GATAGATAGATAGATAGATAGATAGATAGATAGATAGATAGATAGATAGATAG;GATAGATAGATA…	GATAGATAGATAGATAGATAGATAGATAG/GATAGATAGATAGATAGATAGATAGATAG	GATAGATAGATAGATAGATAGATAGATAGATAGATAG/GATAGATAGATAGATAGATAGATAGATAGATAGATAGATAGATAG	GATAGATAGATAGATAGATAGATAGATAGATAGATAGATAGATAGATAGATAG/GATAGATAGATAGATAGATAGATAGATAGATAGATAGATAGATAGATAGATAGATAG	GATAGATAGATAGATAGATAGATAGATAG/GATAGATAGATAGATAGATAGATAGATAG	GATAGATAGATAGATAGATAGATAGATAG/GATAGATAGATAGATAGATAGATAGATAG	GATAGATAGATAGATAGATAGATAGATAG/GATAGATAGATAGATAGATAGATAGATAG	GATAGATAGATAGATAGATAGATAGATAG/GATAGATAGATAGATAGATAGATAGATAG	GATAGATAGATAGATAGATAGATAGATAG/GATAGATAGATAGATAGATAGATAGATAG	GATAGATAGATAGATAGATAGATAGATAG/GATAGATAGATAGATAGATAGATAGATAG	GATAGATAGATAGATAGATAGATAGATAG/GATAGATAGATAGATAGATAGATAGATAG	GATAGATAGATAGATAGATAGATAGATAGATAG/GATAGATAGATAGATAGATAGATAGATAGATAGATAG	GATAGATAGATAGATAGATAGATAGATAGATAGATAG/GATAGATAGATAGATAGATAGATAGATAGATAGATAGATAG	GATAGATAGATAGATAGATAGATAG/GATAGATAGATAGATAGATAGATAG	GATAGATAGATAGATAGATAGATAG/GATAGATAGATAGATAGATAGATAGATAGATAGATAGATAGATAGATAG	GATAGATAGATAGATAGATAGATAG/GATAGATAGATAGATAGATAGATAGATAGATAGATAGATAGATAGATAGATAG	GATAGATAGATAGATAGATAGATAGATAGATAGATAGATAG/GATAGATAGATAGATAGATAGATAGATAGATAGATAGATAG	GATAGATAGATAGATAGATAGATAGATAGATAGATAG/GATAGATAGATAGATAGATAGATAGATAGATAGATAG	GATAGATAGATAGATAGATAGATAGATAGATAG/GATAGATAGATAGATAGATAGATAGATAGATAGATAGATAG	GATAGATAGATAGATAGATAGATAGATAGATAGATAG/GATAGATAGATAGATAGATAGATAGATAGATAGATAG	GATAGATAGATAGATAGATAGATAGATAGATAG/GATAGATAGATAGATAGATAGATAGATAGATAG	GATAGATAGATAGATAGATAGATAG/GATAGATAGATAGATAGATAGATAGATAGATAGATAGATAGATAGATAGATAG	GATAGATAGATAGATAGATAGATAGATAGATAGATAGATAG/GATAGATAGATAGATAGATAGATAGATAGATAGATAGATAGATAGATAG	GATAGATAGATAGATAGATAGATAGATAG/GATAGATAGATAGATAGATAGATAGATAG	GATAGATAGATAGATAGATAGATAGATAGATAG/GATAGATAGATAGATAGATAGATAGATAGATAGATAGATAG	GATAGATAGATAGATAGATAGATAG/GATAGATAGATAGATAGATAGATAGATAG	GATAGATAGATAGATAGATAGATAGATAGATAG/GATAGATAGATAGATAGATAGATAGATAGATAGATAGATAGATAGATAGATAG	GATAGATAGATAGATAGATAGATAGATAGATAGATAGATAGATAGATAG/GATAGATAGATAGATAGATAGATAGATAGATAGATAGATAGATAGATAGATAG	GATAGATAGATAGATAGATAGATAGATAGATAGATAGATAG/GATAGATAGATAGATAGATAGATAGATAGATAGATAGATAGATAG	GATAGATAGATAGATAGATAGATAGATAGATAGATAGATAGATAG/GATAGATAGATAGATAGATAGATAGATAGATAGATAGATAGATAGATAG	GATAGATAGATAGATAGATAGATAGATAG/GATAGATAGATAGATAGATAGATAGATAG	GATAGATAGATAGATAGATAGATAGATAGATAGATAG/GATAGATAGATAGATAGATAGATAGATAGATAGATAG	GATAGATAGATAGATAGATAGATAG/GATAGATAGATAGATAGATAGATAG	GATAGATAGATAGATAGATAGATAGATAG/GATAGATAGATAGATAGATAGATAGATAGATAGATAGATAGATAGATAGATAGATAGATAG	GATAGATAGATAGATAGATAGATAGATAG/GATAGATAGATAGATAGATAGATAGATAG	GATAGATAGATAGATAGATAG/GATAGATAGATAGATAGATAGATAGATAGATAG	GATAGATAGATAGATAGATAGATAGATAGATAG/GATAGATAGATAGATAGATAGATAGATAGATAG	GATAGATAGATAGATAGATAGATAGATAGATAG/GATAGATAGATAGATAGATAGATAGATAGATAG	GATAGATAGATAGATAGATAGATAGATAG/GATAGATAGATAGATAGATAGATAGATAG	GATAGATAGATAGATAGATAGATAGATAGATAGATAGATAGATAGATAG/GATAGATAGATAGATAGATAGATAGATAGATAGATAGATAGATAGATAGATAG	GATAGATAGATAGATAGATAGATAGATAGATAG/GATAGATAGATAGATAGATAGATAGATAGATAG	GATAGATAGATAGATAGATAGATAGATAG/GATAGATAGATAGATAGATAGATAGATAG
Xunr8	1	45968001	CTTGCACAATGTATATATGAATGATCAAATCCTTCTTTCC	48.396	CAGTTGGCTCGCAGTCACAGCCTAAGCCGCCGCCATTCAC	62.651	ATATATATATATATATATATATATATATATATATATATATA	ATATATATA;ATATATATATA;ATATATATATATA;ATATATATATATATATATATATA;ATATATATATATATATATATATATATATATATATATATATATATATATATA;ATATATATATATATATATATATATATATATATATATATATATATATATATATATAT	./.	./.	./.	./.	./.	./.	./.	./.	./.	ATATATATATATA/ATATATATATATA	./.	./.	./.	ATATATATATA/ATATATATATA	./.	./.	./.	./.	./.	./.	./.	./.	./.	./.	./.	./.	./.	./.	./.	./.	./.	./.	./.	./.	ATATATATATATATATATATATA/ATATATATATATATATATATATA	./.	./.	./.	./.	./.	./.
Xunr9	1	57683641	GCGGCCTGCTGCTGCGCTGCCATCGATTCGATCAATCAAG	62.065	CAAAAGCCAAAAGCTTAAAAGAGGCGGCGCGTCACGTTGG	59.396	GAAAGAAGGAAGGAAGGAAGGAAGGAAGGA	GAAAGAAGGA;GAAAGAAGGAAGG;GAAAGAAGGAAGGA;GAAAGAAGGAAGGAAGGA;GAAAGAAGGAAGGAAGGAAGGAAGGA	GAAAGAAGGAAGGAAGGAAGGAAGGA/GAAAGAAGGAAGGAAGGAAGGAAGGA	GAAAGAAGGAAGGAAGGAAGGAAGGAAGGA/GAAAGAAGGAAGGAAGGAAGGAAGGAAGGA	GAAAGAAGGAAGGAAGGAAGGAAGGAAGGA/GAAAGAAGGAAGGAAGGAAGGAAGGAAGGA	GAAAGAAGGAAGGAAGGAAGGAAGGAAGGA/GAAAGAAGGAAGGAAGGAAGGAAGGAAGGA	GAAAGAAGGAAGGAAGGAAGGAAGGA/GAAAGAAGGAAGGAAGGAAGGAAGGA	GAAAGAAGGAAGGAAGGAAGGAAGGA/GAAAGAAGGAAGGAAGGAAGGAAGGA	GAAAGAAGGAAGGAAGGAAGGAAGGAAGGA/GAAAGAAGGAAGGAAGGAAGGAAGGAAGGA	GAAAGAAGGAAGGA/GAAAGAAGGAAGGA	GAAAGAAGGAAGGAAGGAAGGAAGGAAGGA/GAAAGAAGGAAGGAAGGAAGGAAGGAAGGA	GAAAGAAGGAAGGAAGGAAGGAAGGA/GAAAGAAGGAAGGAAGGAAGGAAGGA	GAAAGAAGGAAGGAAGGAAGGAAGGAAGGA/GAAAGAAGGAAGGAAGGAAGGAAGGAAGGA	GAAAGAAGGAAGGAAGGAAGGAAGGAAGGA/GAAAGAAGGAAGGAAGGAAGGAAGGAAGGA	GAAAGAAGGAAGGA/GAAAGAAGGAAGGAAGGA	GAAAGAAGGAAGGAAGGAAGGAAGGAAGGA/GAAAGAAGGAAGGAAGGAAGGAAGGAAGGA	GAAAGAAGGAAGGAAGGAAGGAAGGAAGGA/GAAAGAAGGAAGGAAGGAAGGAAGGAAGGA	GAAAGAAGGAAGGAAGGAAGGAAGGAAGGA/GAAAGAAGGAAGGAAGGAAGGAAGGAAGGA	GAAAGAAGGAAGGAAGGA/GAAAGAAGGAAGGAAGGAAGGAAGGAAGGA	GAAAGAAGGAAGGAAGGA/GAAAGAAGGAAGGAAGGAAGGAAGGA	GAAAGAAGGAAGGAAGGAAGGAAGGA/GAAAGAAGGAAGGAAGGAAGGAAGGA	GAAAGAAGGAAGGAAGGA/GAAAGAAGGAAGGAAGGA	GAAAGAAGGAAGGAAGGAAGGAAGGAAGGA/GAAAGAAGGAAGGAAGGAAGGAAGGAAGGA	GAAAGAAGGAAGGAAGGAAGGAAGGAAGGA/GAAAGAAGGAAGGAAGGAAGGAAGGAAGGA	GAAAGAAGGAAGGAAGGAAGGAAGGAAGGA/GAAAGAAGGAAGGAAGGAAGGAAGGAAGGA	GAAAGAAGGAAGGAAGGAAGGAAGGAAGGA/GAAAGAAGGAAGGAAGGAAGGAAGGAAGGA	GAAAGAAGGAAGGAAGGAAGGAAGGAAGGA/GAAAGAAGGAAGGAAGGAAGGAAGGAAGGA	GAAAGAAGGAAGGAAGGAAGGAAGGAAGGA/GAAAGAAGGAAGGAAGGAAGGAAGGAAGGA	GAAAGAAGGAAGGAAGGAAGGAAGGAAGGA/GAAAGAAGGAAGGAAGGAAGGAAGGAAGGA	GAAAGAAGGAAGGAAGGAAGGAAGGAAGGA/GAAAGAAGGAAGGAAGGAAGGAAGGAAGGA	GAAAGAAGGAAGGAAGGAAGGAAGGAAGGA/GAAAGAAGGAAGGAAGGAAGGAAGGAAGGA	GAAAGAAGGAAGGAAGGAAGGAAGGAAGGA/GAAAGAAGGAAGGAAGGAAGGAAGGAAGGA	GAAAGAAGGAAGGAAGGAAGGAAGGAAGGA/GAAAGAAGGAAGGAAGGAAGGAAGGAAGGA	GAAAGAAGGAAGG/GAAAGAAGGAAGGA	GAAAGAAGGAAGGAAGGAAGGAAGGAAGGA/GAAAGAAGGAAGGAAGGAAGGAAGGAAGGA	GAAAGAAGGAAGGAAGGAAGGAAGGAAGGA/GAAAGAAGGAAGGAAGGAAGGAAGGAAGGA	GAAAGAAGGAAGGAAGGAAGGAAGGA/GAAAGAAGGAAGGAAGGAAGGAAGGA	GAAAGAAGGA/GAAAGAAGGAAGGAAGGAAGGAAGGA	GAAAGAAGGAAGGAAGGAAGGAAGGA/GAAAGAAGGAAGGAAGGAAGGAAGGA	GAAAGAAGGAAGGAAGGAAGGAAGGAAGGA/GAAAGAAGGAAGGAAGGAAGGAAGGAAGGA	GAAAGAAGGAAGGAAGGAAGGAAGGAAGGA/GAAAGAAGGAAGGAAGGAAGGAAGGAAGGA	GAAAGAAGGAAGGAAGGAAGGAAGGAAGGA/GAAAGAAGGAAGGAAGGAAGGAAGGAAGGA	GAAAGAAGGAAGGAAGGAAGGAAGGAAGGA/GAAAGAAGGAAGGAAGGAAGGAAGGAAGGA
Xunr10	1	58633027	GCTACACATACATTTGTCAACTACGCGAGCCACCGATACC	56.349	GATCAGATTCCTCTCAAACTCGTTTTTTTATTGACATTGC	50.324	CTCTCTCTCTCTCTCTCTCTCTCT	CTCTCTCTCTCTCTCTCTCTCTCT;CTCTCTCTCT;CTCTCTCTCTCT;CTCTCTCTCTCTCT;CTCTCTCTCTCTCTCT;CTCTCTCTCTCTCTCTCT;CTCTCTCTCTCTCTCTCTCT;CTCTCTCTCTCTCTCTCTCTCT;CTCTCTCTCTCTCTCTCTCTCTCTCT;CTCTCTCTCTCTCTCTCTCTCTCTCTCT;CTCTCTCTCTCTCTCTCTCTCTCTCTCTCT;CTCTCTCTCTCTCTCTCTCTCTCTCTCTCTCT;CTCTCTCTCTCTCTCTCTCTCTCTCTCTCTCTCT;CTCTCTCTCTCTCTCTCTCTCTCTCTCTCTCTCTC;CTCTCTCTCTCTCTCTCTCTCTCTCTCTCTCTCTCT;CTCTCTCTCTCTCTCTCTCTCTCTCTC…	CTCTCTCTCTCTCTCTCTCTCTCT/CTCTCTCTCTCTCTCTCTCTCTCTCTCTCTCTCTCTCTCT	CTCTCTCTCTCTCTCTCT/CTCTCTCTCTCTCTCTCT	CTCTCTCTCTCTCTCT/CTCTCTCTCTCTCTCTCT	CTCTCTCTCTCTCTCTCTCTCT/CTCTCTCTCTCTCTCTCTCTCTCT	CTCTCTCTCTCTCTCTCTCTCTCTCTCT/CTCTCTCTCTCTCTCTCTCTCTCTCTCTCT	CTCTCTCTCTCTCTCT/CTCTCTCTCTCTCTCTCT	CTCTCTCTCTCTCTCTCTCTCTCT/CTCTCTCTCTCTCTCTCTCTCTCTCT	CTCTCTCTCTCTCTCTCTCTCTCTCTCT/CTCTCTCTCTCTCTCTCTCTCTCTCTCTCTCT	CTCTCTCTCTCTCTCT/CTCTCTCTCTCTCTCTCT	CTCTCTCTCTCTCTCTCTCTCT/CTCTCTCTCTCTCTCTCTCTCTCTCTCTCTCTCT	CTCTCTCTCTCTCTCTCTCT/CTCTCTCTCTCTCTCTCTCTCT	CTCTCTCTCTCTCTCT/CTCTCTCTCTCTCTCTCT	CTCTCTCTCTCTCTCTCTCTCTCTCTCTCT/CTCTCTCTCTCTCTCTCTCTCTCTCTCTCTCTCT	CTCTCTCTCTCTCTCTCTCT/CTCTCTCTCTCTCTCTCTCTCT	CTCTCTCTCTCTCTCTCTCTCT/CTCTCTCTCTCTCTCTCTCTCTCT	CTCTCTCTCTCTCTCT/CTCTCTCTCTCTCTCTCTCTCTCT	CTCTCTCTCTCTCTCT/CTCTCTCTCTCTCTCTCT	CTCTCTCTCTCTCTCT/CTCTCTCTCTCTCTCTCT	CTCTCTCTCTCTCTCTCTCTCTCTCT/CTCTCTCTCTCTCTCTCTCTCTCTCTCTCTCTCTCTCT	CTCTCTCTCTCTCTCTCT/CTCTCTCTCTCTCTCTCTCTCTCTCTCTCT	CTCTCTCTCTCTCTCTCTCT/CTCTCTCTCTCTCTCTCTCTCT	CTCTCTCTCTCTCTCTCT/CTCTCTCTCTCTCTCTCT	CTCTCTCTCTCTCTCTCTCTCT/CTCTCTCTCTCTCTCTCTCTCTCT	CTCTCTCTCTCTCTCT/CTCTCTCTCTCTCTCTCT	CTCTCTCTCTCTCTCTCTCTCTCT/CTCTCTCTCTCTCTCTCTCTCTCT	CTCTCTCTCTCTCTCT/CTCTCTCTCTCTCTCTCT	CTCTCTCTCTCTCTCT/CTCTCTCTCTCTCTCTCT	CTCTCTCTCTCTCTCT/CTCTCTCTCTCTCTCTCT	CTCTCTCTCTCTCTCTCTCTCT/CTCTCTCTCTCTCTCTCTCTCTCT	CTCTCTCTCTCTCTCT/CTCTCTCTCTCTCTCTCTCT	CTCTCTCTCTCTCTCT/CTCTCTCTCTCTCTCTCT	CTCTCTCTCTCTCTCTCTCTCTCTCTCTCTCT/CTCTCTCTCTCTCTCTCTCTCTCTCTCTCTCTCT	CTCTCTCTCTCTCTCTCTCTCTCT/CTCTCTCTCTCTCTCTCTCTCTCTCT	CTCTCTCTCTCTCTCTCTCTCT/CTCTCTCTCTCTCTCTCTCTCTCT	CTCTCTCTCTCTCTCTCTCTCTCT/CTCTCTCTCTCTCTCTCTCTCTCTCT	CTCTCTCTCTCTCTCTCT/CTCTCTCTCTCTCTCTCT	CTCTCTCTCTCTCTCTCTCTCTCTCTCTCTCTCT/CTCTCTCTCTCTCTCTCTCTCTCTCTCTCTCTCTCTCTCTCT	CTCTCTCTCTCTCTCTCTCTCT/CTCTCTCTCTCTCTCTCTCTCTCT	CTCTCTCTCTCTCTCTCTCTCT/CTCTCTCTCTCTCTCTCTCTCTCT	CTCTCTCTCTCTCTCTCT/CTCTCTCTCTCTCTCTCTCTCTCTCTCTCTCTCTCTCTCTCT	CTCTCTCTCTCTCTCTCTCT/CTCTCTCTCTCTCTCTCTCTCT
Xunr11	1	60795133	CCACCTCCGGCCTCTCTGGCCGTTTTCAATTTCGGACTAC	59.412	GCCTGGTTCCTTGGTTGCTCTCAACACGGCTCCGCCTTCG	62.297	AGAGAGAGAGAGAGAGAGAGAGAGAGAGAGAGAGAGAGAGA	AGAGAGAGAGAGAGAGAGAGAGAGAGAGAGAGAGAGAGAGA;AGAGAGAGA;AGAGAGAGAGA;AGAGAGAGAGAGA;AGAGAGAGAGAGAGAGA;AGAGAGAGAGAGAGAGAGA;AGAGAGAGAGAGAGAGAGAGA;AGAGAGAGAGAGAGAGAGAGAGA;AGAGAGAGAGAGAGAGAGAGAGAGA;AGAGAGAGAGAGAGAGAGAGAGAGAGAGA;AGAGAGAGAGAGAGAGAGAGAGAGAGAGAGA;AGAGAGAGAGAGAGAGAGAGAGAGAGAGAGAGA;AGAGAGAGAGAGAGAGAGAGAGAGAGAGAGAGAGA;AGAGAGAGAGAGAGAGAGAGAGAGAGAGAGAGAGAGA;AGAGAGAGAGAGAGAGAGAGAGAGAGAGAGAGAGAGAGA;A…	AGAGAGAGAGAGAGAGAGAGAGAGAGAGAGA/AGAGAGAGAGAGAGAGAGAGAGAGAGAGAGAGA	AGAGAGAGAGA/AGAGAGAGAGAGAGAGAGAGAGAGAGAGAGAGAGAGAGA	AGAGAGAGAGAGAGAGAGAGAGAGAGAGAGAGAGAGAGAGA/AGAGAGAGAGAGAGAGAGAGAGAGAGAGAGAGAGAGAGAGAGA	AGAGAGAGAGAGAGAGAGAGAGAGAGAGAGAGAGAGAGA/AGAGAGAGAGAGAGAGAGAGAGAGAGAGAGAGAGAGAGAGA	AGAGAGAGAGAGAGAGA/AGAGAGAGAGAGAGAGAGA	AGAGAGAGAGAGAGAGA/AGAGAGAGAGAGAGAGAGA	AGAGAGAGAGAGAGAGAGAGAGAGAGAGAGAGAGA/AGAGAGAGAGAGAGAGAGAGAGAGAGAGAGAGAGAGA	AGAGAGAGAGAGAGAGAGAGAGAGAGAGAGAGAGA/AGAGAGAGAGAGAGAGAGAGAGAGAGAGAGAGAGA	AGAGAGAGAGAGAGAGAGAGAGAGAGAGAGAGAGAGA/AGAGAGAGAGAGAGAGAGAGAGAGAGAGAGAGAGAGAGA	AGAGAGAGAGAGAGAGA/AGAGAGAGAGAGAGAGAGA	AGAGAGAGAGAGAGAGAGAGAGAGAGAGAGAGAGAGA/AGAGAGAGAGAGAGAGAGAGAGAGAGAGAGAGAGAGAGAGA	AGAGAGAGAGAGAGAGAGAGAGAGAGAGAGAGAGAGAGAGA/AGAGAGAGAGAGAGAGAGAGAGAGAGAGAGAGAGAGAGAGAGAGAGAGAGA	AGAGAGAGA/AGAGAGAGAGAGAGAGAGAGAGAGAGAGAGAGAGAGAGA	AGAGAGAGAGAGAGAGAGAGAGAGAGAGAGAGAGAGAGAGA/AGAGAGAGAGAGAGAGAGAGAGAGAGAGAGAGAGAGAGAGA	AGAGAGAGAGAGAGAGAGAGAGAGAGAGAGAGAGAGAGAGAGA/AGAGAGAGAGAGAGAGAGAGAGAGAGAGAGAGAGAGAGAGAGAGA	AGAGAGAGAGAGAGAGAGAGAGAGAGAGA/AGAGAGAGAGAGAGAGAGAGAGAGAGAGAGAGAGAGAGAGAGAGAGAGA	AGAGAGAGAGAGAGAGAGAGAGAGA/AGAGAGAGAGAGAGAGAGAGAGAGAGAGAGAGA	AGAGAGAGAGAGAGAGAGAGAGA/AGAGAGAGAGAGAGAGAGAGAGAGA	AGAGAGAGAGAGAGAGAGAGAGAGAGAGAGAGAGAGA/AGAGAGAGAGAGAGAGAGAGAGAGAGAGAGAGAGAGAGA	AGAGAGAGAGAGAGAGAGAGAGAGAGAGAGAGAGAGAGAGAGAGA/AGAGAGAGAGAGAGAGAGAGAGAGAGAGAGAGAGAGAGAGAGAGA	AGAGAGAGAGA/AGAGAGAGAGAGAGAGAGAGAGAGAGAGAGAGAGAGAGAGAGA	AGAGAGAGAGAGAGAGAGAGAGAGAGAGAGAGAGAGA/AGAGAGAGAGAGAGAGAGAGAGAGAGAGAGAGAGAGAGAGA	AGAGAGAGAGA/AGAGAGAGAGAGAGAGAGAGAGAGAGAGAGAGAGAGAGAGA	AGAGAGAGAGAGAGAGAGAGAGAGAGAGAGAGAGA/AGAGAGAGAGAGAGAGAGAGAGAGAGAGAGAGAGAGAGAGA	AGAGAGAGAGAGAGAGAGAGAGAGAGAGAGAGAGA/AGAGAGAGAGAGAGAGAGAGAGAGAGAGAGAGAGAGAGA	AGAGAGAGAGAGAGAGAGAGAGAGAGAGAGAGAGAGAGA/AGAGAGAGAGAGAGAGAGAGAGAGAGAGAGAGAGAGAGAGA	AGAGAGAGAGAGAGAGAGAGAGAGAGAGAGAGAGA/AGAGAGAGAGAGAGAGAGAGAGAGAGAGAGAGAGAGAGAGA	AGAGAGAGAGAGAGAGAGAGAGAGAGAGA/AGAGAGAGAGAGAGAGAGAGAGAGAGAGAGAGAGAGAGAGA	AGAGAGAGAGAGAGAGAGAGAGAGAGAGAGAGAGAGA/AGAGAGAGAGAGAGAGAGAGAGAGAGAGAGAGAGAGAGAGAGA	AGAGAGAGAGAGAGAGAGAGAGAGAGAGAGAGAGAGAGA/AGAGAGAGAGAGAGAGAGAGAGAGAGAGAGAGAGAGAGAGA	AGAGAGAGAGAGAGAGAGAGAGAGAGAGAGAGAGAGAGAGA/AGAGAGAGAGAGAGAGAGAGAGAGAGAGAGAGAGAGAGAGAGA	AGAGAGAGAGAGAGAGAGAGAGAGAGAGAGAGA/AGAGAGAGAGAGAGAGAGAGAGAGAGAGAGAGA	AGAGAGAGAGAGAGAGAGAGA/AGAGAGAGAGAGAGAGAGAGAGAGAGAGAGAGAGAGAGA	AGAGAGAGAGAGAGAGAGAGAGAGAGAGAGAGAGAGAGA/AGAGAGAGAGAGAGAGAGAGAGAGAGAGAGAGAGAGAGAGA	AGAGAGAGAGAGAGAGAGAGAGAGAGAGAGAGAGAGAGAGA/AGAGAGAGAGAGAGAGAGAGAGAGAGAGAGAGAGAGAGAGAGA	AGAGAGAGAGAGAGAGAGAGAGAGAGAGAGAGAGAGAGA/AGAGAGAGAGAGAGAGAGAGAGAGAGAGAGAGAGAGAGAGA	AGAGAGAGAGAGAGAGAGAGAGAGAGAGAGA/AGAGAGAGAGAGAGAGAGAGAGAGAGAGAGAGA	AGAGAGAGAGAGAGAGAGAGAGAGAGAGAGAGAGAGA/AGAGAGAGAGAGAGAGAGAGAGAGAGAGAGAGAGAGAGAGA	AGAGAGAGAGAGAGAGAGAGAGAGAGAGAGAGAGAGAGA/AGAGAGAGAGAGAGAGAGAGAGAGAGAGAGAGAGAGAGAGA	AGAGAGAGAGAGAGAGAGAGAGAGAGAGAGAGAGAGAGAGA/AGAGAGAGAGAGAGAGAGAGAGAGAGAGAGAGAGAGAGAGA	AGAGAGAGAGAGAGAGAGAGAGA/AGAGAGAGAGAGAGAGAGAGAGAGAGAGAGAGAGAGAGAGA
Xunr12	1	62230244	TTGTTGCGTAATCTGGCAGCAGAATAGGTGATGACTAATG	53.7	TTTATACTACTTATTCTACTCTTTTCAATAAGCAGGAAAC	45.94	TATATATATATATATATATATATATATATATATATATATAT	TATATATAT;TATATATATAT;TATATATATATAT;TATATATATATATAT;TATATATATATATATAT;TATATATATATATATATAT;TATATATATATATATATATAT	./.	TATATATATAT/TATATATATATATATATATAT	./.	./.	TATATATATATATATAT/TATATATATATATATATAT	./.	./.	./.	./.	TATATATATATATATATAT/TATATATATATATATATAT	./.	./.	./.	TATATATAT/TATATATAT	./.	./.	./.	./.	./.	./.	./.	./.	./.	./.	./.	./.	./.	./.	TATATATATATATATATAT/TATATATATATATATATAT	./.	./.	./.	./.	./.	./.	./.	./.	./.	./.	./.	./.
Xunr13	1	63448370	GATCCTAATATTTCGGGGAGGTGGGGACTGCTGAGTGCTG	57.386	GCCCGCGCCCGCGCCGTGCGCGAGTGGAGTGGAGAGTGAG	69.061	TCACCTCACCTCACCTCACC	TCACCTCAC;TCACCTCACC;TCACCTCACCTCACC;TCACCTCACCTCACCT;TCACCTCACCTCACCTCAC;TCACCTCACCTCACCTCACCTCACC	./.	TCACCTCACCTCACCTCACC/TCACCTCACCTCACCTCACC	TCACCTCACCTCACCTCACC/TCACCTCACCTCACCTCACC	TCACCTCACC/TCACCTCACC	TCACCTCAC/TCACCTCAC	TCACCTCAC/TCACCTCAC	TCACCTCACC/TCACCTCACC	TCACCTCACCTCACCTCACC/TCACCTCACCTCACCTCACC	TCACCTCACCTCACCTCACC/TCACCTCACCTCACCTCACC	TCACCTCAC/TCACCTCACCTCACCTCACC	TCACCTCACCTCACCTCACC/TCACCTCACCTCACCTCACC	TCACCTCACCTCACCTCACC/TCACCTCACCTCACCTCACC	TCACCTCACCTCACCTCACC/TCACCTCACCTCACCTCACC	TCACCTCACC/TCACCTCACC	TCACCTCACCTCACCTCACC/TCACCTCACCTCACCTCACC	TCACCTCACCTCACCTCACC/TCACCTCACCTCACCTCACC	TCACCTCACCTCACCTCACC/TCACCTCACCTCACCTCACC	TCACCTCACCTCACCTCACC/TCACCTCACCTCACCTCACC	TCACCTCACCTCACCTCACC/TCACCTCACCTCACCTCACC	TCACCTCACCTCACCTCACC/TCACCTCACCTCACCTCACC	TCACCTCACCTCACCTCACC/TCACCTCACCTCACCTCACC	TCACCTCACCTCACCTCACC/TCACCTCACCTCACCTCACC	TCACCTCACCTCACCTCACC/TCACCTCACCTCACCTCACC	TCACCTCACC/TCACCTCACCTCACCTCACC	TCACCTCACCTCACCTCACC/TCACCTCACCTCACCTCACC	TCACCTCACC/TCACCTCACC	TCACCTCACCTCACC/TCACCTCACCTCACCTCACC	TCACCTCACC/TCACCTCACC	TCACCTCACCTCACCTCACC/TCACCTCACCTCACCTCACC	TCACCTCACCTCACCTCACC/TCACCTCACCTCACCTCACC	TCACCTCACCTCACCTCACC/TCACCTCACCTCACCTCACC	TCACCTCACCTCACCTCACC/TCACCTCACCTCACCTCACC	TCACCTCACCTCACCTCACC/TCACCTCACCTCACCTCACC	TCACCTCACCTCACCTCACC/TCACCTCACCTCACCTCACC	TCACCTCACC/TCACCTCACCTCACCTCACC	TCACCTCACCTCACCTCACC/TCACCTCACCTCACCTCACC	TCACCTCACCTCACCTCACCTCACC/TCACCTCACCTCACCTCACCTCACC	TCACCTCACCTCACCTCACC/TCACCTCACCTCACCTCACC	TCACCTCACCTCACCTCACC/TCACCTCACCTCACCTCACC	TCACCTCACC/TCACCTCACC	TCACCTCACCTCACCTCACC/TCACCTCACCTCACCTCACC
Xunr14	1	64621847	ATCCAGTCACATATATTACTGAGATCATATTGATGAAGAC	47.569	CTCTGACATTCTTATGAAGCAATACAAATACAATTCAGAG	48.248	TATATATATATATATAT	TATATATAT;TATATATATAT;TATATATATATAT;TATATATATATATAT;TATATATATATATATATAT;TATATATATATATATATATATATATATATATATATATATATATATATA	./.	TATATATATAT/TATATATATATAT	TATATATATATAT/TATATATATATAT	TATATATATATAT/TATATATATATAT	TATATATATATATAT/TATATATATATATATAT	TATATATATATATAT/TATATATATATATATAT	TATATATATATATAT/TATATATATATATATAT	TATATATATATAT/TATATATATATAT	TATATATATATATAT/TATATATATATATATAT	TATATATATATATATAT/TATATATATATATATAT	TATATATATATATATAT/TATATATATATATATAT	TATATATATATATATATAT/TATATATATATATATATAT	TATATATATAT/TATATATATATAT	TATATATATATATAT/TATATATATATATATAT	./.	TATATATATATATATATAT/TATATATATATATATATAT	TATATATATATAT/TATATATATATATATAT	TATATATATATATATAT/TATATATATATATATATAT	TATATATATATAT/TATATATATATAT	./.	TATATATATATATAT/TATATATATATATATAT	TATATATATATATAT/TATATATATATATATAT	TATATATATATATAT/TATATATATATATATAT	TATATATATATAT/TATATATATATAT	TATATATATATATAT/TATATATATATATATAT	TATATATATATATAT/TATATATATATATATAT	TATATATATATATAT/TATATATATATATATAT	TATATATATATATAT/TATATATATATATATAT	TATATATATATATATAT/TATATATATATATATAT	TATATATATATATAT/TATATATATATATATAT	TATATATATATATAT/TATATATATATATATAT	TATATATATATAT/TATATATATATAT	TATATATATATATAT/TATATATATATATATAT	TATATATATATATAT/TATATATATATATATAT	./.	TATATATATATAT/TATATATATATAT	./.	TATATATATATAT/TATATATATATAT	TATATATATATATATAT/TATATATATATATATAT	TATATATATATAT/TATATATATATATAT	TATATATATATATAT/TATATATATATATATAT
Xunr15	1	64973397	CTCAGTCTTGACACCGTCTTTAGTAGCCTTCGCCGCCGCC	60.635	GTTCTACGAGGCGTCGCGCAGCAGGAAGAAGAAGAACCAG	59.762	TCCTCCTCCTCCTCCTCCTCCTCCCCCTCCTCCTC	TCCTCCTCCTCCTCCTCCTCCTCCCCCTCCTCCTC;TCCTCCTCCTCCTC;TCCTCCTCCTCCTCCTC;TCCTCCTCCTCCTCCTCC;TCCTCCTCCTCCTCCTCCTC;TCCTCCTCCTCCTCCTCCTCCTC;TCCTCCTCCTCCTCCTCCTCCTCCCC;TCCTCCTCCTCCTCCTCCTCCTCCCCCTC;TCCTCCTCCTCCTCCTCCTCCTCCCCCTCCTC;TCCTCCTCCTCCTCCTCCTCCTCCCCCTCCTCCTCCT;TCCTCCTCCTCCTCCTCCTCCTCCCCCTCCTCCTCCTC;TCCTCCTCCTCCTCCTCCTCCTCCCCCTCCTCCTCCTCCT;TCCTCCTCCTCCTCCTCCTCCTCCCCCTCCTCCTCCTCCTC;TCCTCCTCCTCCTCCT…	./.	TCCTCCTCCTCCTCCTCCTCCTCCCCCTCCTCCTC/TCCTCCTCCTCCTCCTCCTCCTCCCCCTCCTCCTC	TCCTCCTCCTCCTCCTCCTCCTCCCCCTCCTC/TCCTCCTCCTCCTCCTCCTCCTCCCCCTCCTCCTC	TCCTCCTCCTCCTCCTCCTCCTCCCCCTCCTCCTCCTC/TCCTCCTCCTCCTCCTCCTCCTCCCCCTCCTCCTCCTCCTC	TCCTCCTCCTCCTCCTCCTCCTCCCCCTCCTCCTC/TCCTCCTCCTCCTCCTCCTCCTCCCCCTCCTCCTC	TCCTCCTCCTCCTCCTCCTCCTCCCCCTCCTCCTC/TCCTCCTCCTCCTCCTCCTCCTCCCCCTCCTCCTC	TCCTCCTCCTCCTCCTCCTCCTCCCCCTCCTCCTC/TCCTCCTCCTCCTCCTCCTCCTCCCCCTCCTCCTCCTCCTC	TCCTCCTCCTCCTCCTCCTCCTCCCCCTCCTCCTC/TCCTCCTCCTCCTCCTCCTCCTCCCCCTCCTCCTC	TCCTCCTCCTCCTCCTCCTCCTCCCCCTCCTCCTCCTCCT/TCCTCCTCCTCCTCCTCCTCCTCCCCCTCCTCCTCCTCCTC	TCCTCCTCCTCCTCCTCCTCCTCCCCCTCCTCCTC/TCCTCCTCCTCCTCCTCCTCCTCCCCCTCCTCCTC	TCCTCCTCCTCCTCCTCCTCCTCCCCCTCCTCCTCCTC/TCCTCCTCCTCCTCCTCCTCCTCCCCCTCCTCCTCCTCCTC	TCCTCCTCCTCCTCCTCCTCCTCCCCCTCCTCCTCCTC/TCCTCCTCCTCCTCCTCCTCCTCCCCCTCCTCCTCCTCCTC	TCCTCCTCCTCCTCCTCCTCCTCCCCCTCCTCCTC/TCCTCCTCCTCCTCCTCCTCCTCCCCCTCCTCCTC	TCCTCCTCCTCCTCCTCCTCCTCCCCCTCCTCCTC/TCCTCCTCCTCCTCCTCCTCCTCCCCCTCCTCCTCCTCCTC	TCCTCCTCCTCCTCCTCCTCCTCCCCCTCCTCCTCCTCCTC/TCCTCCTCCTCCTCCTCCTCCTCCCCCTCCTCCTCCTCCTC	TCCTCCTCCTCCTCCTCCTCCTCCCCCTCCTCCTC/TCCTCCTCCTCCTCCTCCTCCTCCCCCTCCTCCTC	TCCTCCTCCTCCTCCTCCTCCTCCCCCTCCTC/TCCTCCTCCTCCTCCTCCTCCTCCCCCTCCTCCTC	TCCTCCTCCTCCTCCTCCTCCTCCCCCTCCTCCTC/TCCTCCTCCTCCTCCTCCTCCTCCCCCTCCTCCTC	TCCTCCTCCTCCTCCTCCTCCTCCCCCTCCTCCTC/TCCTCCTCCTCCTCCTCCTCCTCCCCCTCCTCCTC	TCCTCCTCCTCCTCCTCCTCCTCCCCCTCCTC/TCCTCCTCCTCCTCCTCCTCCTCCCCCTCCTCCTC	TCCTCCTCCTCCTCCTCCTCCTCCCCCTCCTCCTC/TCCTCCTCCTCCTCCTCCTCCTCCCCCTCCTCCTC	TCCTCCTCCTCCTCCTCCTCCTCCCCCTCCTCCTCCT/TCCTCCTCCTCCTCCTCCTCCTCCCCCTCCTCCTCCTCCTC	TCCTCCTCCTCCTCCTCCTCCTCCCCCTCCTC/TCCTCCTCCTCCTCCTCCTCCTCCCCCTCCTCCTC	TCCTCCTCCTCCTCCTCCTCCTCCCCCTCCTCCTC/TCCTCCTCCTCCTCCTCCTCCTCCCCCTCCTCCTC	TCCTCCTCCTCCTCCTCCTCCTCCCCCTCCTCCTC/TCCTCCTCCTCCTCCTCCTCCTCCCCCTCCTCCTC	TCCTCCTCCTCCTCCTCCTCCTCCCCCTCCTCCTC/TCCTCCTCCTCCTCCTCCTCCTCCCCCTCCTCCTC	./.	TCCTCCTCCTCCTCCTCCTCCTCCCCCTCCTCCTCCTCCTC/TCCTCCTCCTCCTCCTCCTCCTCCCCCTCCTCCTCCTCCTC	TCCTCCTCCTCCTCCTCCTCCTCCCCCTCCTC/TCCTCCTCCTCCTCCTCCTCCTCCCCCTCCTCCTC	TCCTCCTCCTCCTCCTCCTCCTCCCCCTCCTCCTCCTCCT/TCCTCCTCCTCCTCCTCCTCCTCCCCCTCCTCCTCCTCCTC	TCCTCCTCCTCCTCCTCCTCCTCCCCCTCCTCCTC/TCCTCCTCCTCCTCCTCCTCCTCCCCCTCCTCCTC	TCCTCCTCCTCCTCCTCCTCCTCCCCCTCCTCCTC/TCCTCCTCCTCCTCCTCCTCCTCCCCCTCCTCCTC	TCCTCCTCCTCCTCCTCCTCCTCCCCCTCCTCCTC/TCCTCCTCCTCCTCCTCCTCCTCCCCCTCCTCCTCCTCCTC	TCCTCCTCCTCCTCCTCCTCCTCCCCCTCCTC/TCCTCCTCCTCCTCCTCCTCCTCCCCCTCCTCCTC	TCCTCCTCCTCCTCCTCCTCCTCCCCCTCCTCCTC/TCCTCCTCCTCCTCCTCCTCCTCCCCCTCCTCCTCCTC	TCCTCCTCCTCCTCCTCCTCCTCCCCCTCCTC/TCCTCCTCCTCCTCCTCCTCCTCCCCCTCCTCCTC	./.	TCCTCCTCCTCCTCCTCCTCCTCCCCCTCCTC/TCCTCCTCCTCCTCCTCCTCCTCCCCCTCCTCCTC	TCCTCCTCCTCCTCCTCCTCCTCCCCCTCCTCCTCCTC/TCCTCCTCCTCCTCCTCCTCCTCCCCCTCCTCCTCCTCCTC	TCCTCCTCCTCCTCCTCCTCCTCCCCCTCCTC/TCCTCCTCCTCCTCCTCCTCCTCCCCCTCCTCCTC	TCCTCCTCCTCCTCCTCCTCCTCCCCCTCCTCCTC/TCCTCCTCCTCCTCCTCCTCCTCCCCCTCCTCCTC
Xunr16	1	68244848	CTGCGATCCGGCGGCCACCGTCAGCGCATCACGGACCTTC	65.722	ACGCCGTGCTGCTCCTTCAACCCGCTGAGGTCCCTCTTCC	63.485	CTGCGGCTGCGGCTGCGGCTGCGGCTGCGGCTACGGCTACGGC	CTGCGGCTGCGGCTGCGGC;CTGCGGCTGCGGCTGCGGCTGCGGC;CTGCGGCTGCGGCTGCGGCTGCGGCTGCGG;CTGCGGCTGCGGCTGCGGCTGCGGCTGCGGC	./.	CTGCGGCTGCGGCTGCGGCTGCGGC/CTGCGGCTGCGGCTGCGGCTGCGGC	CTGCGGCTGCGGCTGCGGCTGCGGCTGCGGCTACGGCTACGGC/CTGCGGCTGCGGCTGCGGCTGCGGCTGCGGCTACGGCTACGGC	./.	./.	./.	./.	./.	./.	./.	CTGCGGCTGCGGCTGCGGCTGCGGCTGCGGCTACGGCTACGGC/CTGCGGCTGCGGCTGCGGCTGCGGCTGCGGCTACGGCTACGGC	CTGCGGCTGCGGCTGCGGCTGCGGCTGCGGCTACGGCTACGGC/CTGCGGCTGCGGCTGCGGCTGCGGCTGCGGCTACGGCTACGGC	./.	CTGCGGCTGCGGCTGCGGCTGCGGC/CTGCGGCTGCGGCTGCGGCTGCGGC	./.	./.	./.	./.	./.	./.	CTGCGGCTGCGGCTGCGGCTGCGGCTGCGGCTACGGCTACGGC/CTGCGGCTGCGGCTGCGGCTGCGGCTGCGGCTACGGCTACGGC	./.	./.	./.	./.	CTGCGGCTGCGGCTGCGGCTGCGGCTGCGGCTACGGCTACGGC/CTGCGGCTGCGGCTGCGGCTGCGGCTGCGGCTACGGCTACGGC	./.	./.	./.	CTGCGGCTGCGGCTGCGGCTGCGGCTGCGGCTACGGCTACGGC/CTGCGGCTGCGGCTGCGGCTGCGGCTGCGGCTACGGCTACGGC	./.	./.	CTGCGGCTGCGGCTGCGGCTGCGGCTGCGGCTACGGCTACGGC/CTGCGGCTGCGGCTGCGGCTGCGGCTGCGGCTACGGCTACGGC	CTGCGGCTGCGGCTGCGGCTGCGGCTGCGGCTACGGCTACGGC/CTGCGGCTGCGGCTGCGGCTGCGGCTGCGGCTACGGCTACGGC	./.	CTGCGGCTGCGGCTGCGGCTGCGGCTGCGGCTACGGCTACGGC/CTGCGGCTGCGGCTGCGGCTGCGGCTGCGGCTACGGCTACGGC	./.	CTGCGGCTGCGGCTGCGGCTGCGGC/CTGCGGCTGCGGCTGCGGCTGCGGC	./.	./.	CTGCGGCTGCGGCTGCGGCTGCGGCTGCGGCTACGGCTACGGC/CTGCGGCTGCGGCTGCGGCTGCGGCTGCGGCTACGGCTACGGC
Xunr17	1	70962227	ACTCTAACAAATAGCTAAAATGCATAATGACGGCGTGCTC	53.065	CACCGGAAAAAAATTTACACTCGGAGTACCATAGAAATGC	52.231	TCTCTCTCTCTCTCTCTCTCTCTCTCTCTCTCTCTC	TCTCTCTCTCTCTCTCTCTCTCTCTCTCTCTCTCTC;TCTCTCTCTCTCTC;TCTCTCTCTCTCTCTC;TCTCTCTCTCTCTCTCT;TCTCTCTCTCTCTCTCTC;TCTCTCTCTCTCTCTCTCT;TCTCTCTCTCTCTCTCTCTC;TCTCTCTCTCTCTCTCTCTCTC;TCTCTCTCTCTCTCTCTCTCTCTC;TCTCTCTCTCTCTCTCTCTCTCTCTC;TCTCTCTCTCTCTCTCTCTCTCTCTCTC;TCTCTCTCTCTCTCTCTCTCTCTCTCTCTC;TCTCTCTCTCTCTCTCTCTCTCTCTCTCTCTC;TCTCTCTCTCTCTCTCTCTCTCTCTCTCTCTCTC;TCTCTCTCTCTCTCTCTCTCTCTCTCTCTCTCTCTCTC;TCTCTCTCTC…	TCTCTCTCTCTCTCTCTCTCTC/TCTCTCTCTCTCTCTCTCTCTCTC	TCTCTCTCTCTCTCTCTCTCTC/TCTCTCTCTCTCTCTCTCTCTCTC	TCTCTCTCTCTCTCTCTCTCTCTCTCTCTCTC/TCTCTCTCTCTCTCTCTCTCTCTCTCTCTCTCTCTC	TCTCTCTCTCTCTCTCTCTCTCTCTCTCTCTC/TCTCTCTCTCTCTCTCTCTCTCTCTCTCTCTCTC	TCTCTCTCTCTCTCTCTCTCTCTCTCTCTCTCTC/TCTCTCTCTCTCTCTCTCTCTCTCTCTCTCTCTCTCTC	TCTCTCTCTCTCTCTCTCTCTCTCTCTCTC/TCTCTCTCTCTCTCTCTCTCTCTCTCTCTCTCTCTCTC	TCTCTCTCTCTCTCTCTCTC/TCTCTCTCTCTCTCTCTCTCTCTCTCTCTCTCTC	TCTCTCTCTCTCTCTCTCTCTCTCTCTCTCTC/TCTCTCTCTCTCTCTCTCTCTCTCTCTCTCTCTC	TCTCTCTCTCTCTCTCTCTCTCTCTCTCTCTCTC/TCTCTCTCTCTCTCTCTCTCTCTCTCTCTCTCTCTC	TCTCTCTCTCTCTCTCTCTCTCTCTCTCTCTCTC/TCTCTCTCTCTCTCTCTCTCTCTCTCTCTCTCTCTCTC	TCTCTCTCTCTCTCTCTCTCTCTCTCTCTCTCTC/TCTCTCTCTCTCTCTCTCTCTCTCTCTCTCTCTCTC	TCTCTCTCTCTCTCTCTCTCTCTCTCTCTC/TCTCTCTCTCTCTCTCTCTCTCTCTCTCTCTCTCTC	TCTCTCTCTCTCTCTCTCTCTCTCTCTC/TCTCTCTCTCTCTCTCTCTCTCTCTCTCTC	TCTCTCTCTCTCTCTCTCTCTCTCTCTCTCTCTCTC/TCTCTCTCTCTCTCTCTCTCTCTCTCTCTCTCTCTC	TCTCTCTCTCTCTCTCTCTCTCTCTCTCTCTCTC/TCTCTCTCTCTCTCTCTCTCTCTCTCTCTCTCTC	TCTCTCTCTCTCTCTCTCTCTCTCTCTCTCTC/TCTCTCTCTCTCTCTCTCTCTCTCTCTCTCTCTC	TCTCTCTCTCTCTCTCTCTCTCTCTCTCTCTCTCTCTCTCTCTCTCTCTCTC/TCTCTCTCTCTCTCTCTCTCTCTCTCTCTCTCTCTCTCTCTCTCTCTCTCTC	TCTCTCTCTCTCTCTCTCTCTCTCTCTCTCTCTCTCTCTCTCTCTCTCTC/TCTCTCTCTCTCTCTCTCTCTCTCTCTCTCTCTCTCTCTCTCTCTCTCTCTC	TCTCTCTCTCTCTCTCTCTCTCTCTCTCTCTCTCTC/TCTCTCTCTCTCTCTCTCTCTCTCTCTCTCTCTCTCTC	TCTCTCTCTCTCTCTCTCTCTC/TCTCTCTCTCTCTCTCTCTCTCTC	TCTCTCTCTCTCTCTCTCTCTCTCTC/TCTCTCTCTCTCTCTCTCTCTCTCTCTCTCTCTCTC	TCTCTCTCTCTCTCTCTCTCTCTCTCTCTCTCTCTCTC/TCTCTCTCTCTCTCTCTCTCTCTCTCTCTCTCTCTCTCTC	TCTCTCTCTCTCTCTCTCTCTCTCTCTCTCTCTCTC/TCTCTCTCTCTCTCTCTCTCTCTCTCTCTCTCTCTCTC	TCTCTCTCTCTCTCTCTCTCTCTCTCTCTCTCTC/TCTCTCTCTCTCTCTCTCTCTCTCTCTCTCTCTCTCTCTCTCTCTCTCTCTC	TCTCTCTCTCTCTCTCTCTCTCTCTCTCTCTC/TCTCTCTCTCTCTCTCTCTCTCTCTCTCTCTCTCTC	TCTCTCTCTCTCTCTCTCTCTCTCTCTCTCTC/TCTCTCTCTCTCTCTCTCTCTCTCTCTCTCTCTCTC	TCTCTCTCTCTCTCTCTCTCTCTCTCTCTC/TCTCTCTCTCTCTCTCTCTCTCTCTCTCTCTCTCTC	TCTCTCTCTCTCTCTCTCTCTCTCTCTCTCTC/TCTCTCTCTCTCTCTCTCTCTCTCTCTCTCTCTC	TCTCTCTCTCTCTCTCTCTCTCTCTCTCTCTCTC/TCTCTCTCTCTCTCTCTCTCTCTCTCTCTCTCTCTC	TCTCTCTCTCTCTCTCTCTCTCTCTCTCTCTCTCTC/TCTCTCTCTCTCTCTCTCTCTCTCTCTCTCTCTCTCTC	./.	TCTCTCTCTCTCTCTCTCTCTCTCTCTCTCTCTC/TCTCTCTCTCTCTCTCTCTCTCTCTCTCTCTCTC	TCTCTCTCTCTCTCTCTCTCTCTCTCTCTCTCTC/TCTCTCTCTCTCTCTCTCTCTCTCTCTCTCTCTCTC	TCTCTCTCTCTCTCTCTCTCTCTCTCTCTCTC/TCTCTCTCTCTCTCTCTCTCTCTCTCTCTCTCTCTC	TCTCTCTCTCTCTCTCTCTCTCTCTCTCTCTCTC/TCTCTCTCTCTCTCTCTCTCTCTCTCTCTCTCTCTCTC	TCTCTCTCTCTCTCTCTCTCTCTCTCTCTCTCTC/TCTCTCTCTCTCTCTCTCTCTCTCTCTCTCTCTCTC	./.	TCTCTCTCTCTCTCTCTCTCTCTC/TCTCTCTCTCTCTCTCTCTCTCTCTCTCTCTCTCTCTC	TCTCTCTCTCTCTCTCTCTCTC/TCTCTCTCTCTCTCTCTCTCTCTC	TCTCTCTCTCTCTCTCTCTCTCTCTCTCTCTCTCTCTCTCTCTCTCTC/TCTCTCTCTCTCTCTCTCTCTCTCTCTCTCTCTCTCTCTCTCTCTCTCTC	./.
Xunr18	1	71709968	TTTTAAGGTTGTTATATTCCAATCAACAGAGGTAGGTGTG	49.725	CTTGAGCATGCCTAATAAGTACACCAAGAAAAAGACAGTG	51.849	ACCATACCATACCATACCATACC	ACCATACCATACC;ACCATACCATACCATACC;ACCATACCATACCATACCATACCATACCATACCATACCATACC;ACCATACCATACCATACCATACCATACCATACCATACCATACCATACC;ACCATACCATACCATACCATACCATACCATACCATACCATACCATACCATACC;ACCATACCATACCATACCATACCATACCATACCATACCATACCATACCATACCATACC;ACCATACCATACCATACCATACCATACCATACCATACCATACCATACCATACCATACCATACC;ACCATACCATACCATACCATACCATACCATACCATACCATACCATACCATACCATACCATACCATACC	./.	ACCATACCATACC/ACCATACCATACC	ACCATACCATACCATACCATACC/ACCATACCATACCATACCATACC	./.	ACCATACCATACCATACCATACCATACCATACCATACCATACCATACCATACCATACCATACC/ACCATACCATACCATACCATACCATACCATACCATACCATACCATACCATACCATACCATACC	ACCATACCATACCATACCATACC/ACCATACCATACCATACCATACCATACCATACCATACCATACCATACCATACCATACCATACCATACC	ACCATACCATACC/ACCATACCATACC	ACCATACCATACCATACCATACC/ACCATACCATACCATACCATACC	ACCATACCATACCATACCATACC/ACCATACCATACCATACCATACC	ACCATACCATACCATACCATACC/ACCATACCATACCATACCATACC	ACCATACCATACCATACCATACC/ACCATACCATACCATACCATACC	ACCATACCATACCATACCATACC/ACCATACCATACCATACCATACC	ACCATACCATACCATACCATACC/ACCATACCATACCATACCATACC	ACCATACCATACC/ACCATACCATACC	ACCATACCATACCATACCATACC/ACCATACCATACCATACCATACC	ACCATACCATACCATACC/ACCATACCATACCATACCATACCATACCATACCATACCATACCATACCATACCATACC	ACCATACCATACCATACCATACC/ACCATACCATACCATACCATACCATACCATACCATACCATACCATACCATACC	ACCATACCATACC/ACCATACCATACC	./.	ACCATACCATACCATACCATACCATACCATACCATACCATACCATACC/ACCATACCATACCATACCATACCATACCATACCATACCATACCATACC	ACCATACCATACCATACCATACC/ACCATACCATACCATACCATACCATACCATACCATACCATACC	ACCATACCATACC/ACCATACCATACC	./.	ACCATACCATACCATACCATACC/ACCATACCATACCATACCATACCATACCATACCATACCATACCATACCATACCATACCATACC	ACCATACCATACCATACCATACC/ACCATACCATACCATACCATACC	ACCATACCATACCATACCATACC/ACCATACCATACCATACCATACC	ACCATACCATACCATACCATACC/ACCATACCATACCATACCATACC	ACCATACCATACCATACCATACC/ACCATACCATACCATACCATACC	ACCATACCATACCATACCATACC/ACCATACCATACCATACCATACC	ACCATACCATACCATACCATACC/ACCATACCATACCATACCATACC	ACCATACCATACCATACCATACC/ACCATACCATACCATACCATACC	ACCATACCATACCATACCATACC/ACCATACCATACCATACCATACC	ACCATACCATACCATACCATACC/ACCATACCATACCATACCATACC	ACCATACCATACCATACCATACC/ACCATACCATACCATACCATACC	./.	ACCATACCATACCATACCATACC/ACCATACCATACCATACCATACC	./.	ACCATACCATACCATACCATACC/ACCATACCATACCATACCATACC	ACCATACCATACCATACCATACC/ACCATACCATACCATACCATACC	ACCATACCATACC/ACCATACCATACCATACCATACCATACCATACCATACCATACCATACCATACCATACCATACC	ACCATACCATACCATACCATACC/ACCATACCATACCATACCATACCATACCATACCATACCATACC
Xunr19	1	73134480	GGCCGGGTCGGAGCCGCGCCGTATGCACCAGTGCATGTGC	67.296	AATTCCGTGGACCATGGGAGCTCATGGCCATGTCCGCCGG	62.715	CTCTCTCTCTCTCTCTCTCT	CTCTCTCTCT;CTCTCTCTCTCT;CTCTCTCTCTCTCT;CTCTCTCTCTCTCTC;CTCTCTCTCTCTCTCT;CTCTCTCTCTCTCTCTCT;CTCTCTCTCTCTCTCTCTCTCT;CTCTCTCTCTCTCTCTCTCTCTCTCT;CTCTCTCTCTCTCTCTCTCTCTCTCTCT;CTCTCTCTCTCTCTCTCTCTCTCTCTCTCT;CTCTCTCTCTCTCTCTCTCTCTCTCTCTCTCT;CTCTCTCTCTCTCTCTCTCTCTCTCTCTCTCTCT;CTCTCTCTCTCTCTCTCTCTCTCTCTCTCTCTCTCT;CTCTCTCTCTCTCTCTCTCTCTCTCTCTCTCTCTCTCT;CTCTCTCTCTCTCTCTCTCTCTCTCTCTCTCTCTCTCTCTCTCTCT	CTCTCTCTCTCTCTCT/CTCTCTCTCTCTCTCTCT	CTCTCTCTCTCTCTCTCTCT/CTCTCTCTCTCTCTCTCTCT	CTCTCTCTCTCTCTCTCTCTCTCTCTCT/CTCTCTCTCTCTCTCTCTCTCTCTCTCT	CTCTCTCTCTCTCTCT/CTCTCTCTCTCTCTCTCT	CTCTCTCTCTCTCTCTCTCTCTCTCTCTCT/CTCTCTCTCTCTCTCTCTCTCTCTCTCTCTCT	CTCTCTCTCTCTCTCTCT/CTCTCTCTCTCTCTCTCTCT	CTCTCTCTCTCTCTCTCT/CTCTCTCTCTCTCTCTCTCT	CTCTCTCTCT/CTCTCTCTCT	CTCTCTCTCTCTCTCTCT/CTCTCTCTCTCTCTCTCT	CTCTCTCTCTCTCTCTCTCTCTCTCTCTCT/CTCTCTCTCTCTCTCTCTCTCTCTCTCTCTCT	CTCTCTCTCTCTCTCT/CTCTCTCTCTCTCTCTCTCTCTCTCTCTCT	CTCTCTCTCTCTCTCTCT/CTCTCTCTCTCTCTCTCTCT	CTCTCTCTCTCTCTCTCTCT/CTCTCTCTCTCTCTCTCTCTCTCTCTCTCTCTCTCTCTCTCTCTCT	CTCTCTCTCTCTCTCTCT/CTCTCTCTCTCTCTCTCT	CTCTCTCTCTCTCTCTCT/CTCTCTCTCTCTCTCTCTCT	CTCTCTCTCTCTCTCT/CTCTCTCTCTCTCTCTCTCTCTCTCTCTCT	CTCTCTCTCTCTCTCT/CTCTCTCTCTCTCTCTCT	CTCTCTCTCTCTCTCTCT/CTCTCTCTCTCTCTCTCT	CTCTCTCTCTCTCTCTCT/CTCTCTCTCTCTCTCTCT	CTCTCTCTCTCTCTCTCTCTCT/CTCTCTCTCTCTCTCTCTCTCT	CTCTCTCTCTCTCTCTCT/CTCTCTCTCTCTCTCTCT	CTCTCTCTCTCTCTCTCT/CTCTCTCTCTCTCTCTCTCT	CTCTCTCTCTCTCTCTCTCTCTCTCT/CTCTCTCTCTCTCTCTCTCTCTCTCTCT	CTCTCTCTCTCTCTCT/CTCTCTCTCTCTCTCTCT	CTCTCTCTCTCTCTCTCT/CTCTCTCTCTCTCTCTCTCT	CTCTCTCTCTCTCTCTCT/CTCTCTCTCTCTCTCTCTCTCTCTCTCTCTCTCT	./.	CTCTCTCTCTCTCT/CTCTCTCTCTCTCTCTCTCTCTCTCTCTCTCTCT	./.	CTCTCTCTCTCTCTCTCTCTCTCTCTCT/CTCTCTCTCTCTCTCTCTCTCTCTCTCTCT	CTCTCTCTCTCTCTCTCTCT/CTCTCTCTCTCTCTCTCTCTCTCTCTCTCTCTCTCTCT	./.	./.	CTCTCTCTCTCTCTCTCT/CTCTCTCTCTCTCTCTCT	CTCTCTCTCTCTCTCTCTCTCT/CTCTCTCTCTCTCTCTCTCTCT	CTCTCTCTCTCTCTCT/CTCTCTCTCTCTCTCTCTCTCTCTCTCT	CTCTCTCTCTCTCTCTCT/CTCTCTCTCTCTCTCTCT	CTCTCTCTCTCTCTCTCTCTCTCTCTCT/CTCTCTCTCTCTCTCTCTCTCTCTCTCTCT	CTCTCTCTCTCTCTCT/CTCTCTCTCTCTCTCTCT	CTCTCTCTCTCTCTCT/CTCTCTCTCTCTCTCTCTCTCTCTCTCTCTCTCTCT	CTCTCTCTCTCTCTCTCT/CTCTCTCTCTCTCTCTCT
Xunr20	1	75089870	AGGATTAGTTAGTTAATTAATAGATAGAACCAACAAGAGG	46.303	ATTTGCAAACCATGCATCTGTCTAGGCCGCGACGACTTGT	58.662	TACACGTACACGTACACGTACACGTAC	TACACGTACACGTAC;TACACGTACACGTACACG;TACACGTACACGTACACGTAC;TACACGTACACGTACACGTACACGTACACGTACACGTAC	./.	./.	./.	./.	./.	./.	./.	./.	TACACGTACACGTACACGTACACGTAC/TACACGTACACGTACACGTACACGTAC	./.	TACACGTACACGTACACGTACACGTAC/TACACGTACACGTACACGTACACGTAC	./.	./.	TACACGTACACGTACACGTACACGTACACGTACACGTAC/TACACGTACACGTACACGTACACGTACACGTACACGTAC	./.	./.	./.	./.	./.	./.	TACACGTACACGTACACGTACACGTACACGTACACGTAC/TACACGTACACGTACACGTACACGTACACGTACACGTAC	./.	TACACGTACACGTACACGTACACGTAC/TACACGTACACGTACACGTACACGTAC	TACACGTACACGTACACGTAC/TACACGTACACGTACACGTAC	./.	./.	./.	./.	./.	./.	./.	./.	./.	./.	./.	./.	./.	./.	./.	./.	./.
Xunr21	1	76201489	CATGAGCACGGTGATGAGTCTTTAATTTTCCTAAACTTGG	52.031	ACATTGCAGTTTTGTATGTACTAAAGTTTATTGCAAGTGC	50.354	GAGAGAGAGAGAGAGAGAGAGAGAGAGAGAGA	GAGAGAGAGAGA;GAGAGAGAGAGAGA;GAGAGAGAGAGAGAGA;GAGAGAGAGAGAGAGAGA;GAGAGAGAGAGAGAGAGAGA;GAGAGAGAGAGAGAGAGAGAGA;GAGAGAGAGAGAGAGAGAGAGAGA;GAGAGAGAGAGAGAGAGAGAGAGAGA;GAGAGAGAGAGAGAGAGAGAGAGAGAGA;GAGAGAGAGAGAGAGAGAGAGAGAGAGAGA;GAGAGAGAGAGAGAGAGAGAGAGAGAGAGAGAGA;GAGAGAGAGAGAGAGAGAGAGAGAGAGAGAGAGAGA;GAGAGAGAGAGAGAGAGAGAGAGAGAGAGAGAGAGAGA;GAGAGAGAGAGAGAGAGAGAGAGAGAGAGAGAGAGAGAGA;GAGAGAGAGAGAGAGAGAGAGAGAGAG…	GAGAGAGAGAGAGAGAGAGAGAGAGAGAGAGAGA/GAGAGAGAGAGAGAGAGAGAGAGAGAGAGAGAGAGA	GAGAGAGAGAGAGAGAGAGAGAGAGAGAGAGA/GAGAGAGAGAGAGAGAGAGAGAGAGAGAGAGAGA	GAGAGAGAGAGAGAGAGAGAGAGAGAGAGAGA/GAGAGAGAGAGAGAGAGAGAGAGAGAGAGAGAGA	GAGAGAGAGAGAGAGAGA/GAGAGAGAGAGAGAGAGAGAGAGAGAGA	GAGAGAGAGAGAGAGAGAGAGAGAGAGAGAGA/GAGAGAGAGAGAGAGAGAGAGAGAGAGAGAGAGAGAGAGA	GAGAGAGAGAGAGAGAGAGAGAGAGAGAGAGAGA/GAGAGAGAGAGAGAGAGAGAGAGAGAGAGAGAGAGAGAGA	GAGAGAGAGAGAGAGAGAGAGAGAGAGAGAGAGAGAGAGAGA/GAGAGAGAGAGAGAGAGAGAGAGAGAGAGAGAGAGAGAGAGAGAGA	GAGAGAGAGAGAGAGAGAGAGAGAGAGAGAGAGAGAGAGAGA/GAGAGAGAGAGAGAGAGAGAGAGAGAGAGAGAGAGAGAGAGAGAGA	GAGAGAGAGAGAGAGAGAGAGAGAGAGAGA/GAGAGAGAGAGAGAGAGAGAGAGAGAGAGAGA	GAGAGAGAGAGAGAGAGAGAGAGA/GAGAGAGAGAGAGAGAGAGAGAGAGA	GAGAGAGAGAGAGAGAGAGAGAGAGA/GAGAGAGAGAGAGAGAGAGAGAGAGAGAGA	GAGAGAGAGAGAGAGAGAGAGAGAGAGAGA/GAGAGAGAGAGAGAGAGAGAGAGAGAGAGAGAGA	GAGAGAGAGAGAGAGAGAGAGAGAGAGAGAGAGAGAGAGAGAGAGAGAGA/GAGAGAGAGAGAGAGAGAGAGAGAGAGAGAGAGAGAGAGAGAGAGAGAGA	GAGAGAGAGAGAGAGAGAGAGAGAGAGAGAGAGAGAGA/GAGAGAGAGAGAGAGAGAGAGAGAGAGAGAGAGAGAGAGA	GAGAGAGAGAGAGAGAGAGAGAGAGAGAGA/GAGAGAGAGAGAGAGAGAGAGAGAGAGAGAGAGA	GAGAGAGAGAGAGAGA/GAGAGAGAGAGAGAGAGAGAGAGAGAGAGAGAGA	GAGAGAGAGAGAGAGAGAGAGAGAGAGAGA/GAGAGAGAGAGAGAGAGAGAGAGAGAGAGAGA	GAGAGAGAGAGAGAGAGAGAGAGAGAGAGA/GAGAGAGAGAGAGAGAGAGAGAGAGAGAGAGA	GAGAGAGAGAGAGAGAGAGAGAGAGAGAGAGAGA/GAGAGAGAGAGAGAGAGAGAGAGAGAGAGAGAGAGA	GAGAGAGAGAGAGAGAGAGAGAGAGAGAGA/GAGAGAGAGAGAGAGAGAGAGAGAGAGAGAGAGA	GAGAGAGAGAGAGAGAGAGAGAGAGAGA/GAGAGAGAGAGAGAGAGAGAGAGAGAGAGAGA	GAGAGAGAGAGAGAGAGAGAGAGAGAGAGA/GAGAGAGAGAGAGAGAGAGAGAGAGAGAGAGA	GAGAGAGAGAGAGAGAGAGA/GAGAGAGAGAGAGAGAGAGAGA	GAGAGAGAGAGAGAGAGAGAGAGAGAGA/GAGAGAGAGAGAGAGAGAGAGAGAGAGAGAGA	GAGAGAGAGAGAGAGAGAGAGAGAGAGA/GAGAGAGAGAGAGAGAGAGAGAGAGAGAGA	GAGAGAGAGAGAGAGAGAGAGAGAGAGAGA/GAGAGAGAGAGAGAGAGAGAGAGAGAGAGAGA	GAGAGAGAGAGAGAGAGAGAGAGAGAGAGA/GAGAGAGAGAGAGAGAGAGAGAGAGAGAGAGA	GAGAGAGAGAGAGAGAGAGAGAGAGAGAGA/GAGAGAGAGAGAGAGAGAGAGAGAGAGAGAGA	GAGAGAGAGAGAGAGAGAGAGAGAGAGAGA/GAGAGAGAGAGAGAGAGAGAGAGAGAGAGAGA	GAGAGAGAGAGAGAGAGAGAGAGAGAGAGA/GAGAGAGAGAGAGAGAGAGAGAGAGAGAGAGA	GAGAGAGAGAGAGAGAGAGAGAGAGAGAGAGAGAGAGAGA/GAGAGAGAGAGAGAGAGAGAGAGAGAGAGAGAGAGAGAGAGAGA	./.	GAGAGAGAGAGAGAGAGAGAGAGAGAGAGAGA/GAGAGAGAGAGAGAGAGAGAGAGAGAGAGAGAGA	GAGAGAGAGAGAGAGAGAGAGAGAGAGAGA/GAGAGAGAGAGAGAGAGAGAGAGAGAGAGAGA	GAGAGAGAGAGAGAGAGAGAGA/GAGAGAGAGAGAGAGAGAGAGAGA	GAGAGAGAGAGAGAGAGAGAGAGAGAGAGAGA/GAGAGAGAGAGAGAGAGAGAGAGAGAGAGAGAGA	GAGAGAGAGAGAGAGAGAGAGAGAGAGAGAGA/GAGAGAGAGAGAGAGAGAGAGAGAGAGAGAGAGAGAGA	GAGAGAGAGAGAGAGAGAGAGAGAGAGA/GAGAGAGAGAGAGAGAGAGAGAGAGAGAGAGA	GAGAGAGAGAGAGAGAGAGAGAGAGAGA/GAGAGAGAGAGAGAGAGAGAGAGAGAGAGAGA	GAGAGAGAGAGAGAGAGAGAGAGAGAGA/GAGAGAGAGAGAGAGAGAGAGAGAGAGAGAGA	GAGAGAGAGAGAGAGAGAGAGAGAGAGAGA/GAGAGAGAGAGAGAGAGAGAGAGAGAGAGAGA
Xunr22	1	77236056	CCCGCTCGCTATACGGAGACAGCCGCCGGTAGGGTAGTAG	61.52	GTGGACGACGGCGCAGCCGCAGGCGCGGTAGCTAGTAGTG	65.423	TCCATCCATCCATCCATCCATCCATCCATCCGATCCA	TCCATCCATCCAT;TCCATCCATCCATCCAT;TCCATCCATCCATCCATCCAT;TCCATCCATCCATCCATCCATC;TCCATCCATCCATCCATCCATCCAT;TCCATCCATCCATCCATCCATCCATCCAT;TCCATCCATCCATCCATCCATCCATCCATCCGA;TCCATCCATCCATCCATCCATCCATCCATCCGATCCACCAT;TCCATCCATCCATCCATCCATCCATCCATCCGATCCACCATCCAT;TCCATCCATCCATCCATCCATCCATCCATCCGATCCACCATCCATCCAT;TCCATCCATCCATCCATCCATCCATCCATCCGATCCACCATCCATCCATCCA;TCCATCCATCCATCCATCCATCCATCCATCCGATCCACCAT…	TCCATCCATCCATCCATCCATCCATCCATCCGATCCACCATCCATCCATCCAT/TCCATCCATCCATCCATCCATCCATCCATCCGATCCACCATCCATCCATCCAT	TCCATCCATCCATCCAT/TCCATCCATCCATCCATCCATCCATCCATCCGATCCACCAT	TCCATCCATCCATCCATCCATCCATCCATCCGATCCACCATCCATCCAT/TCCATCCATCCATCCATCCATCCATCCATCCGATCCACCATCCATCCATCCAT	TCCATCCATCCATCCATCCATCCATCCATCCGATCCA/TCCATCCATCCATCCATCCATCCATCCATCCGATCCA	TCCATCCATCCATCCATCCATCCATCCATCCGATCCACCAT/TCCATCCATCCATCCATCCATCCATCCATCCGATCCACCATCCAT	TCCATCCATCCATCCATCCATCCATCCATCCGATCCACCATCCAT/TCCATCCATCCATCCATCCATCCATCCATCCGATCCACCATCCAT	TCCATCCATCCATCCATCCATCCATCCATCCGATCCA/TCCATCCATCCATCCATCCATCCATCCATCCGATCCA	TCCATCCATCCATCCATCCATCCATCCATCCGA/TCCATCCATCCATCCATCCATCCATCCATCCGA	TCCATCCATCCATCCATCCATCCATCCATCCGATCCACCATCCATCCAT/TCCATCCATCCATCCATCCATCCATCCATCCGATCCACCATCCATCCATCCAT	TCCATCCATCCATCCATCCATCCATCCATCCGATCCA/TCCATCCATCCATCCATCCATCCATCCATCCGATCCACCATCCAT	TCCATCCATCCATCCATCCATCCATCCATCCGATCCACCATCCAT/TCCATCCATCCATCCATCCATCCATCCATCCGATCCACCATCCATCCAT	TCCATCCATCCATCCATCCATCCATCCATCCGATCCACCATCCATCCAT/TCCATCCATCCATCCATCCATCCATCCATCCGATCCACCATCCATCCAT	TCCATCCATCCATCCATCCATCCATCCATCCGA/TCCATCCATCCATCCATCCATCCATCCATCCGA	TCCATCCATCCATCCATCCATCCATCCATCCGATCCACCAT/TCCATCCATCCATCCATCCATCCATCCATCCGATCCACCATCCAT	TCCATCCATCCATCCATCCATCCATCCATCCGA/TCCATCCATCCATCCATCCATCCATCCATCCGA	TCCATCCATCCATCCATCCATCCATCCATCCGATCCACCATCCATCCAT/TCCATCCATCCATCCATCCATCCATCCATCCGATCCACCATCCATCCAT	TCCATCCATCCATCCATCCATCCATCCATCCGA/TCCATCCATCCATCCATCCATCCATCCATCCGATCCACCAT	TCCATCCATCCATCCATCCATCCATCCATCCGATCCACCAT/TCCATCCATCCATCCATCCATCCATCCATCCGATCCACCAT	TCCATCCATCCATCCATCCATCCATCCATCCGATCCACCATCCAT/TCCATCCATCCATCCATCCATCCATCCATCCGATCCACCATCCAT	TCCATCCATCCATCCATCCATCCATCCATCCGATCCACCAT/TCCATCCATCCATCCATCCATCCATCCATCCGATCCACCAT	TCCATCCATCCATCCATCCATCCATCCATCCGATCCACCATCCAT/TCCATCCATCCATCCATCCATCCATCCATCCGATCCACCATCCAT	TCCATCCATCCATCCATCCATCCATCCATCCGATCCA/TCCATCCATCCATCCATCCATCCATCCATCCGATCCA	TCCATCCATCCATCCATCCATCCATCCATCCGATCCACCATCCAT/TCCATCCATCCATCCATCCATCCATCCATCCGATCCACCATCCAT	TCCATCCATCCATCCATCCATCCATCCATCCGATCCACCATCCAT/TCCATCCATCCATCCATCCATCCATCCATCCGATCCACCATCCAT	TCCATCCATCCATCCATCCATCCATCCATCCGATCCA/TCCATCCATCCATCCATCCATCCATCCATCCGATCCA	TCCATCCATCCATCCATCCATCCATCCATCCGATCCACCATCCATCCATCCAT/TCCATCCATCCATCCATCCATCCATCCATCCGATCCACCATCCATCCATCCATCCAT	TCCATCCATCCATCCATCCATCCATCCATCCGATCCACCAT/TCCATCCATCCATCCATCCATCCATCCATCCGATCCACCAT	TCCATCCATCCATCCATCCATCCATCCATCCGATCCACCATCCATCCAT/TCCATCCATCCATCCATCCATCCATCCATCCGATCCACCATCCATCCATCCAT	TCCATCCATCCATCCATCCATCCATCCATCCGATCCACCATCCATCCAT/TCCATCCATCCATCCATCCATCCATCCATCCGATCCACCATCCATCCAT	TCCATCCATCCATCCATCCATCCATCCATCCGATCCACCATCCAT/TCCATCCATCCATCCATCCATCCATCCATCCGATCCACCATCCATCCAT	TCCATCCATCCATCCATCCATCCATCCATCCGATCCACCATCCAT/TCCATCCATCCATCCATCCATCCATCCATCCGATCCACCATCCAT	TCCATCCATCCATCCATCCATCCAT/TCCATCCATCCATCCATCCATCCAT	TCCATCCATCCATCCATCCATCCATCCATCCGATCCACCATCCATCCAT/TCCATCCATCCATCCATCCATCCATCCATCCGATCCACCATCCATCCAT	TCCATCCATCCATCCATCCATCCATCCATCCGATCCACCATCCATCCAT/TCCATCCATCCATCCATCCATCCATCCATCCGATCCACCATCCATCCATCCAT	TCCATCCATCCATCCATCCATCCATCCATCCGATCCACCATCCAT/TCCATCCATCCATCCATCCATCCATCCATCCGATCCACCATCCAT	TCCATCCATCCATCCATCCATCCATCCATCCGATCCACCATCCATCCATCCAT/TCCATCCATCCATCCATCCATCCATCCATCCGATCCACCATCCATCCATCCAT	TCCATCCATCCATCCATCCATCCATCCATCCGATCCACCATCCATCCATCCA/TCCATCCATCCATCCATCCATCCATCCATCCGATCCACCATCCATCCATCCAT	TCCATCCATCCATCCATCCATCCATCCATCCGATCCACCATCCAT/TCCATCCATCCATCCATCCATCCATCCATCCGATCCACCATCCATCCAT	TCCATCCATCCATCCATCCATCCATCCATCCGATCCACCATCCATCCAT/TCCATCCATCCATCCATCCATCCATCCATCCGATCCACCATCCATCCAT	TCCATCCATCCATCCATCCATCCATCCATCCGATCCACCAT/TCCATCCATCCATCCATCCATCCATCCATCCGATCCACCAT	TCCATCCATCCATCCATCCATCCATCCATCCGATCCACCATCCAT/TCCATCCATCCATCCATCCATCCATCCATCCGATCCACCATCCAT
Xgma3	1	78120648	ATACATACATATCTGTTAGGCCATGCATGAACATCTAAAC	49.687	GAAACCGGAAGAAAGATTGCACTCGATCGTGTAATAGTCG	54.162	ACTACTACTACTACTACTACTACTACT	ACTACTACT;ACTACTACTACT;ACTACTACTACTA;ACTACTACTACTACT;ACTACTACTACTACTA;ACTACTACTACTACTACT;ACTACTACTACTACTACTACT;ACTACTACTACTACTACTACTACT;ACTACTACTACTACTACTACTACTACTACT;ACTACTACTACTACTACTACTACTACTACTA;ACTACTACTACTACTACTACTACTACTACTACT;ACTACTACTACTACTACTACTACTACTACTACTACT;ACTACTACTACTACTACTACTACTACTACTACTACTA;ACTACTACTACTACTACTACTACTACTACTACTACTACTA;ACTACTACTACTACTACTACTACTACTACTACTACTACTACTA;ACTACT…	ACTACTACTACTACTACTACT/ACTACTACTACTACTACTACTACT	ACTACTACTACTACTACTACTACTACTACT/ACTACTACTACTACTACTACTACTACTACTACT	ACTACTACTACTACTACTACTACTACTACT/ACTACTACTACTACTACTACTACTACTACTACT	ACTACTACTACTACTACTACT/ACTACTACTACTACTACTACT	ACTACTACTACTACTACTACTACTACT/ACTACTACTACTACTACTACTACTACTACT	ACTACTACTACTACTACTACTACTACT/ACTACTACTACTACTACTACTACTACTACT	ACTACTACT/ACTACTACTACTACTACTACTACT	ACTACTACTACTACTACT/ACTACTACTACTACTACT	ACTACTACTACTACTACTACT/ACTACTACTACTACTACTACT	ACTACTACTACTACTACTACTACTACT/ACTACTACTACTACTACTACTACTACT	ACTACTACTACTACTACTACT/ACTACTACTACTACTACTACT	ACTACTACTACTACTACTACT/ACTACTACTACTACTACTACT	ACTACTACTACTACTACT/ACTACTACTACTACTACT	ACTACTACTACTACTACT/ACTACTACTACTACTACTACTACTACTACT	ACTACTACTACTACTACTACT/ACTACTACTACTACTACTACT	ACTACTACTACTACTACTACT/ACTACTACTACTACTACTACT	ACTACTACTACTACTACTACTACTACT/ACTACTACTACTACTACTACTACTACTACT	ACTACTACTACTACTACTACTACTACTACTACTACTACTA/ACTACTACTACTACTACTACTACTACTACTACTACTACTACTA	ACTACTACTACTACTACTACTACTACT/ACTACTACTACTACTACTACTACTACTACT	ACTACTACTACTACTACTACTACTACT/ACTACTACTACTACTACTACTACTACTACT	ACTACTACTACTACTACTACTACTACT/ACTACTACTACTACTACTACTACTACTACT	ACTACTACTACTACTACTACTACTACT/ACTACTACTACTACTACTACTACTACT	ACTACTACTACTACTACTACTACTACT/ACTACTACTACTACTACTACTACTACTACT	ACTACTACTACTACTACTACTACTACTACT/ACTACTACTACTACTACTACTACTACTACTACT	ACTACTACTACTACTACTACTACTACT/ACTACTACTACTACTACTACTACTACT	ACTACTACTACTACTACTACTACTACT/ACTACTACTACTACTACTACTACTACTACT	ACTACTACTACTACTACTACTACT/ACTACTACTACTACTACTACTACTACT	ACTACTACTACTACTACTACT/ACTACTACTACTACTACTACT	ACTACTACTACTACTACTACT/ACTACTACTACTACTACTACT	ACTACTACTACTACTACTACTACTACT/ACTACTACTACTACTACTACTACTACT	ACTACTACTACTACTACTACTACTACT/ACTACTACTACTACTACTACTACTACTACT	ACTACTACTACTACTACT/ACTACTACTACTACTACT	ACTACTACTACTACTACTACT/ACTACTACTACTACTACTACT	ACTACTACTACTACTACTACTACTACTACTACT/ACTACTACTACTACTACTACTACTACTACTACT	ACTACTACTACTACTACTACTACTACTACTACT/ACTACTACTACTACTACTACTACTACTACTACTACT	ACTACTACTACTACTACTACTACTACTACT/ACTACTACTACTACTACTACTACTACTACTACT	ACTACTACTACTACTACTACTACT/ACTACTACTACTACTACTACTACT	ACTACTACTACTACTACTACTACT/ACTACTACTACTACTACTACTACTACT	ACTACTACTACTACTACTACT/ACTACTACTACTACTACTACT	ACTACTACTACTACTACTACTACTACT/ACTACTACTACTACTACTACTACTACTACT	ACTACTACTACTACTACTACTACTACTACTACT/ACTACTACTACTACTACTACTACTACTACTACTACTACTACTA
Xunr23	1	79583103	CTGCGCCGCGCGTGCTCGCTCTCCGCCTTTTTCTAGTTTC	63.098	TCGGGGGGCTCTCTCTCCTCGCTCGCATCGCATGAAGAGG	62.763	CTTCGCTTCGCTTCGCTTC	CTTCGCTTC;CTTCGCTTCGCTTC;CTTCGCTTCGCTTCGCTT;CTTCGCTTCGCTTCGCTTCGCTTC	CTTCGCTTCGCTTCGCTTC/CTTCGCTTCGCTTCGCTTC	CTTCGCTTCGCTTCGCTTC/CTTCGCTTCGCTTCGCTTC	CTTCGCTTCGCTTCGCTTC/CTTCGCTTCGCTTCGCTTC	CTTCGCTTCGCTTCGCTTC/CTTCGCTTCGCTTCGCTTC	CTTCGCTTCGCTTCGCTTCGCTTC/CTTCGCTTCGCTTCGCTTCGCTTC	CTTCGCTTCGCTTCGCTTCGCTTC/CTTCGCTTCGCTTCGCTTCGCTTC	CTTCGCTTCGCTTCGCTTC/CTTCGCTTCGCTTCGCTTC	./.	CTTCGCTTCGCTTCGCTTC/CTTCGCTTCGCTTCGCTTC	CTTCGCTTCGCTTCGCTTCGCTTC/CTTCGCTTCGCTTCGCTTCGCTTC	CTTCGCTTCGCTTCGCTTC/CTTCGCTTCGCTTCGCTTC	CTTCGCTTCGCTTCGCTTC/CTTCGCTTCGCTTCGCTTC	CTTCGCTTC/CTTCGCTTC	CTTCGCTTCGCTTCGCTTC/CTTCGCTTCGCTTCGCTTC	CTTCGCTTCGCTTCGCTTC/CTTCGCTTCGCTTCGCTTC	CTTCGCTTCGCTTCGCTTC/CTTCGCTTCGCTTCGCTTC	CTTCGCTTCGCTTCGCTTC/CTTCGCTTCGCTTCGCTTC	CTTCGCTTCGCTTCGCTTC/CTTCGCTTCGCTTCGCTTC	CTTCGCTTCGCTTCGCTTC/CTTCGCTTCGCTTCGCTTC	CTTCGCTTCGCTTCGCTTC/CTTCGCTTCGCTTCGCTTC	CTTCGCTTCGCTTCGCTTC/CTTCGCTTCGCTTCGCTTC	CTTCGCTTCGCTTCGCTTC/CTTCGCTTCGCTTCGCTTC	CTTCGCTTCGCTTCGCTTCGCTTC/CTTCGCTTCGCTTCGCTTCGCTTC	CTTCGCTTCGCTTCGCTTCGCTTC/CTTCGCTTCGCTTCGCTTCGCTTC	CTTCGCTTCGCTTCGCTTC/CTTCGCTTCGCTTCGCTTC	CTTCGCTTCGCTTCGCTTC/CTTCGCTTCGCTTCGCTTC	CTTCGCTTCGCTTCGCTTC/CTTCGCTTCGCTTCGCTTC	CTTCGCTTCGCTTCGCTTC/CTTCGCTTCGCTTCGCTTC	CTTCGCTTCGCTTCGCTTC/CTTCGCTTCGCTTCGCTTC	CTTCGCTTCGCTTCGCTTC/CTTCGCTTCGCTTCGCTTC	CTTCGCTTCGCTTCGCTTC/CTTCGCTTCGCTTCGCTTC	./.	CTTCGCTTCGCTTCGCTTC/CTTCGCTTCGCTTCGCTTC	CTTCGCTTCGCTTCGCTTC/CTTCGCTTCGCTTCGCTTC	CTTCGCTTCGCTTCGCTTC/CTTCGCTTCGCTTCGCTTC	CTTCGCTTCGCTTCGCTTC/CTTCGCTTCGCTTCGCTTC	CTTCGCTTCGCTTCGCTTC/CTTCGCTTCGCTTCGCTTC	CTTCGCTTCGCTTCGCTTC/CTTCGCTTCGCTTCGCTTC	CTTCGCTTCGCTTCGCTTC/CTTCGCTTCGCTTCGCTTC	CTTCGCTTCGCTTCGCTTC/CTTCGCTTCGCTTCGCTTC	CTTCGCTTCGCTTCGCTTC/CTTCGCTTCGCTTCGCTTC
Xunr24	2	1708396	GAGGATCTCCGCGGTGACGTCTTCGTTCAGCTCCGGCTCC	62.417	CTGAGCACGAGCGCCGGCACACCTCCGGCCCTCCCCATGG	67.359	GCTGCTGCTGCCGCTGCCGCTGCCGCCGCCGCCGCCGC	GCTGCTGCTGCCGCTGCCGCTGCCGC;GCTGCTGCTGCCGCTGCCGCTGCCGCCGCCGCCGC;GCTGCTGCTGCCGCTGCCGCTGCCGCCGCCGCCGCCG;GCTGCTGCTGCCGCTGCCGCTGCCGCCGCCGCCGCCGCTGCTGC	GCTGCTGCTGCCGCTGCCGCTGCCGCCGCCGCCGCCGC/GCTGCTGCTGCCGCTGCCGCTGCCGCCGCCGCCGCCGC	GCTGCTGCTGCCGCTGCCGCTGCCGCCGCCGCCGCCGC/GCTGCTGCTGCCGCTGCCGCTGCCGCCGCCGCCGCCGC	GCTGCTGCTGCCGCTGCCGCTGCCGCCGCCGCCGCCGC/GCTGCTGCTGCCGCTGCCGCTGCCGCCGCCGCCGCCGC	GCTGCTGCTGCCGCTGCCGCTGCCGC/GCTGCTGCTGCCGCTGCCGCTGCCGC	GCTGCTGCTGCCGCTGCCGCTGCCGCCGCCGCCGCCGC/GCTGCTGCTGCCGCTGCCGCTGCCGCCGCCGCCGCCGC	GCTGCTGCTGCCGCTGCCGCTGCCGCCGCCGCCGCCGC/GCTGCTGCTGCCGCTGCCGCTGCCGCCGCCGCCGCCGC	GCTGCTGCTGCCGCTGCCGCTGCCGCCGCCGCCGCCGCTGCTGC/GCTGCTGCTGCCGCTGCCGCTGCCGCCGCCGCCGCCGCTGCTGC	GCTGCTGCTGCCGCTGCCGCTGCCGC/GCTGCTGCTGCCGCTGCCGCTGCCGCCGCCGCCGCCGC	GCTGCTGCTGCCGCTGCCGCTGCCGCCGCCGCCGCCGC/GCTGCTGCTGCCGCTGCCGCTGCCGCCGCCGCCGCCGC	GCTGCTGCTGCCGCTGCCGCTGCCGCCGCCGCCGCCGC/GCTGCTGCTGCCGCTGCCGCTGCCGCCGCCGCCGCCGC	GCTGCTGCTGCCGCTGCCGCTGCCGCCGCCGCCGCCGC/GCTGCTGCTGCCGCTGCCGCTGCCGCCGCCGCCGCCGC	GCTGCTGCTGCCGCTGCCGCTGCCGCCGCCGCCGCCGC/GCTGCTGCTGCCGCTGCCGCTGCCGCCGCCGCCGCCGC	GCTGCTGCTGCCGCTGCCGCTGCCGC/GCTGCTGCTGCCGCTGCCGCTGCCGC	GCTGCTGCTGCCGCTGCCGCTGCCGCCGCCGCCGCCGC/GCTGCTGCTGCCGCTGCCGCTGCCGCCGCCGCCGCCGCTGCTGC	GCTGCTGCTGCCGCTGCCGCTGCCGCCGCCGCCGCCGC/GCTGCTGCTGCCGCTGCCGCTGCCGCCGCCGCCGCCGC	GCTGCTGCTGCCGCTGCCGCTGCCGCCGCCGCCGCCGC/GCTGCTGCTGCCGCTGCCGCTGCCGCCGCCGCCGCCGC	GCTGCTGCTGCCGCTGCCGCTGCCGCCGCCGCCGCCGC/GCTGCTGCTGCCGCTGCCGCTGCCGCCGCCGCCGCCGC	GCTGCTGCTGCCGCTGCCGCTGCCGCCGCCGCCGCCGC/GCTGCTGCTGCCGCTGCCGCTGCCGCCGCCGCCGCCGC	GCTGCTGCTGCCGCTGCCGCTGCCGCCGCCGCCGCCGC/GCTGCTGCTGCCGCTGCCGCTGCCGCCGCCGCCGCCGC	GCTGCTGCTGCCGCTGCCGCTGCCGCCGCCGCCGCCG/GCTGCTGCTGCCGCTGCCGCTGCCGCCGCCGCCGCCGC	GCTGCTGCTGCCGCTGCCGCTGCCGCCGCCGCCGCCGC/GCTGCTGCTGCCGCTGCCGCTGCCGCCGCCGCCGCCGCTGCTGC	GCTGCTGCTGCCGCTGCCGCTGCCGCCGCCGCCGCCGCTGCTGC/GCTGCTGCTGCCGCTGCCGCTGCCGCCGCCGCCGCCGCTGCTGC	GCTGCTGCTGCCGCTGCCGCTGCCGCCGCCGCCGCCGC/GCTGCTGCTGCCGCTGCCGCTGCCGCCGCCGCCGCCGC	GCTGCTGCTGCCGCTGCCGCTGCCGCCGCCGCCGCCGC/GCTGCTGCTGCCGCTGCCGCTGCCGCCGCCGCCGCCGC	GCTGCTGCTGCCGCTGCCGCTGCCGCCGCCGCCGCCGC/GCTGCTGCTGCCGCTGCCGCTGCCGCCGCCGCCGCCGC	GCTGCTGCTGCCGCTGCCGCTGCCGCCGCCGCCGCCGC/GCTGCTGCTGCCGCTGCCGCTGCCGCCGCCGCCGCCGC	GCTGCTGCTGCCGCTGCCGCTGCCGCCGCCGCCGCCGC/GCTGCTGCTGCCGCTGCCGCTGCCGCCGCCGCCGCCGC	GCTGCTGCTGCCGCTGCCGCTGCCGCCGCCGCCGCCGC/GCTGCTGCTGCCGCTGCCGCTGCCGCCGCCGCCGCCGC	GCTGCTGCTGCCGCTGCCGCTGCCGCCGCCGCCGCCGC/GCTGCTGCTGCCGCTGCCGCTGCCGCCGCCGCCGCCGC	GCTGCTGCTGCCGCTGCCGCTGCCGCCGCCGCCGCCGC/GCTGCTGCTGCCGCTGCCGCTGCCGCCGCCGCCGCCGC	GCTGCTGCTGCCGCTGCCGCTGCCGCCGCCGCCGCCGC/GCTGCTGCTGCCGCTGCCGCTGCCGCCGCCGCCGCCGC	GCTGCTGCTGCCGCTGCCGCTGCCGC/GCTGCTGCTGCCGCTGCCGCTGCCGC	GCTGCTGCTGCCGCTGCCGCTGCCGCCGCCGCCGCCGC/GCTGCTGCTGCCGCTGCCGCTGCCGCCGCCGCCGCCGC	GCTGCTGCTGCCGCTGCCGCTGCCGCCGCCGCCGCCGC/GCTGCTGCTGCCGCTGCCGCTGCCGCCGCCGCCGCCGC	GCTGCTGCTGCCGCTGCCGCTGCCGCCGCCGCCGCCGC/GCTGCTGCTGCCGCTGCCGCTGCCGCCGCCGCCGCCGC	GCTGCTGCTGCCGCTGCCGCTGCCGCCGCCGCCGCCGC/GCTGCTGCTGCCGCTGCCGCTGCCGCCGCCGCCGCCGC	GCTGCTGCTGCCGCTGCCGCTGCCGCCGCCGCCGCCGC/GCTGCTGCTGCCGCTGCCGCTGCCGCCGCCGCCGCCGC	GCTGCTGCTGCCGCTGCCGCTGCCGCCGCCGCCGCCGCTGCTGC/GCTGCTGCTGCCGCTGCCGCTGCCGCCGCCGCCGCCGCTGCTGC	GCTGCTGCTGCCGCTGCCGCTGCCGCCGCCGCCGCCGCTGCTGC/GCTGCTGCTGCCGCTGCCGCTGCCGCCGCCGCCGCCGCTGCTGC	GCTGCTGCTGCCGCTGCCGCTGCCGC/GCTGCTGCTGCCGCTGCCGCTGCCGC	GCTGCTGCTGCCGCTGCCGCTGCCGCCGCCGCCGCCGC/GCTGCTGCTGCCGCTGCCGCTGCCGCCGCCGCCGCCGC
Xunr25	2	2544453	AGTGATGCATGAGTGCCTCTCGCCATGGCTAGTGGCATGC	60.677	CATCATGCTTATATATGCTCCTCGTGTTTAATTTCTGTAG	49.132	ATCTATCTATCTATCTATCTATCTATCTATCTATCTATCTATCT	ATCTATCTATCT;ATCTATCTATCTAT;ATCTATCTATCTATCT;ATCTATCTATCTATCTAT;ATCTATCTATCTATCTATCT;ATCTATCTATCTATCTATCTATCT;ATCTATCTATCTATCTATCTATCTATCT;ATCTATCTATCTATCTATCTATCTATCTATCT;ATCTATCTATCTATCTATCTATCTATCTATCTATCT;ATCTATCTATCTATCTATCTATCTATCTATCTATCTATCT;ATCTATCTATCTATCTATCTATCTATCTATCTATCTATCTATCTATCT;ATCTATCTATCTATCTATCTATCTATCTATCTATCTATCTATCTATCTATCT;ATCTATCTATCTATCTATCTATCTATCTATCTATCTATCTATCTATC…	ATCTATCTATCTATCTATCTATCTATCTATCTATCTATCTATCT/ATCTATCTATCTATCTATCTATCTATCTATCTATCTATCTATCT	ATCTATCTATCT/ATCTATCTATCTATCTATCTATCTATCTATCT	ATCTATCTATCTATCTATCTATCTATCTATCTATCTATCTATCT/ATCTATCTATCTATCTATCTATCTATCTATCTATCTATCTATCT	ATCTATCTATCTATCTATCTATCTATCT/ATCTATCTATCTATCTATCTATCTATCT	ATCTATCTATCTATCTATCTATCTATCTATCT/ATCTATCTATCTATCTATCTATCTATCTATCT	ATCTATCTATCTATCTATCTATCTATCT/ATCTATCTATCTATCTATCTATCTATCTATCT	ATCTATCTATCTATCTATCTATCTATCTATCT/ATCTATCTATCTATCTATCTATCTATCTATCT	ATCTATCTATCTATCTATCTATCTATCT/ATCTATCTATCTATCTATCTATCTATCT	ATCTATCTATCTATCTATCTATCTATCTATCTATCTATCT/ATCTATCTATCTATCTATCTATCTATCTATCTATCTATCT	ATCTATCTATCTATCTATCTATCTATCTATCT/ATCTATCTATCTATCTATCTATCTATCTATCT	ATCTATCTATCTATCTATCTATCTATCT/ATCTATCTATCTATCTATCTATCTATCT	ATCTATCTATCTATCTATCTATCTATCTATCTATCTATCT/ATCTATCTATCTATCTATCTATCTATCTATCTATCTATCTATCT	ATCTATCTATCTATCTATCTATCTATCT/ATCTATCTATCTATCTATCTATCTATCTATCT	ATCTATCTATCTATCTATCTATCT/ATCTATCTATCTATCTATCTATCTATCTATCT	ATCTATCTATCTATCTATCTATCTATCTATCT/ATCTATCTATCTATCTATCTATCTATCTATCT	ATCTATCTATCTATCTATCTATCTATCTATCT/ATCTATCTATCTATCTATCTATCTATCTATCT	ATCTATCTATCTATCTATCTATCTATCTATCT/ATCTATCTATCTATCTATCTATCTATCTATCTATCT	ATCTATCTATCTATCTATCTATCT/ATCTATCTATCTATCTATCTATCT	ATCTATCTATCTATCTATCTATCTATCTATCTATCTATCT/ATCTATCTATCTATCTATCTATCTATCTATCTATCTATCT	ATCTATCTATCTATCTATCTATCTATCTATCTATCTATCT/ATCTATCTATCTATCTATCTATCTATCTATCTATCTATCTATCT	ATCTATCTATCTATCTATCTATCTATCTATCT/ATCTATCTATCTATCTATCTATCTATCTATCTATCTATCT	ATCTATCTATCTATCTATCTATCTATCTATCTATCTATCT/ATCTATCTATCTATCTATCTATCTATCTATCTATCTATCTATCT	ATCTATCTATCTATCTATCTATCTATCTATCTATCTATCT/ATCTATCTATCTATCTATCTATCTATCTATCTATCTATCT	ATCTATCTATCTATCTATCTATCTATCTATCTATCTATCT/ATCTATCTATCTATCTATCTATCTATCTATCTATCTATCTATCTATCT	ATCTATCTATCTATCTATCTATCTATCTATCTATCTATCTATCT/ATCTATCTATCTATCTATCTATCTATCTATCTATCTATCTATCT	ATCTATCTATCTATCTATCTATCTATCTATCTATCTATCTATCT/ATCTATCTATCTATCTATCTATCTATCTATCTATCTATCTATCT	ATCTATCTATCTATCTATCTATCTATCTATCTATCTATCT/ATCTATCTATCTATCTATCTATCTATCTATCTATCTATCTATCT	ATCTATCTATCTATCTATCTATCTATCTATCTATCT/ATCTATCTATCTATCTATCTATCTATCTATCTATCTATCTATCT	ATCTATCTATCTATCTATCTATCTATCTATCT/ATCTATCTATCTATCTATCTATCTATCTATCT	ATCTATCTATCTATCTATCTATCTATCTATCTATCTATCT/ATCTATCTATCTATCTATCTATCTATCTATCTATCTATCTATCT	ATCTATCTATCTATCTATCTATCTATCTATCT/ATCTATCTATCTATCTATCTATCTATCTATCTATCT	ATCTATCTATCTATCTATCTATCTATCT/ATCTATCTATCTATCTATCTATCTATCT	ATCTATCTATCTATCTATCTATCTATCTATCT/ATCTATCTATCTATCTATCTATCTATCTATCT	ATCTATCTATCTATCTATCTATCTATCTATCTATCTATCT/ATCTATCTATCTATCTATCTATCTATCTATCTATCTATCT	ATCTATCTATCTATCTATCTATCTATCT/ATCTATCTATCTATCTATCTATCTATCT	ATCTATCTATCTATCTATCTATCTATCTATCTATCTATCTATCT/ATCTATCTATCTATCTATCTATCTATCTATCTATCTATCTATCT	ATCTATCTATCTATCTATCTATCTATCTATCTATCTATCTATCT/ATCTATCTATCTATCTATCTATCTATCTATCTATCTATCTATCTATCT	ATCTATCTATCTATCTATCTATCTATCT/ATCTATCTATCTATCTATCTATCTATCT	ATCTATCTATCTATCTATCTATCTATCT/ATCTATCTATCTATCTATCTATCTATCTATCT	ATCTATCTATCTATCTATCTATCTATCTATCTATCT/ATCTATCTATCTATCTATCTATCTATCTATCTATCTATCT	ATCTATCTATCTATCTATCTATCTATCTATCTATCTATCT/ATCTATCTATCTATCTATCTATCTATCTATCTATCTATCT
Xunr26	2	4325265	CCGGGAGGAGGAGGTGGAGCGCGGCGGGGCACGCGAGCAT	69.261	GCGCGTCGCCACCCTCTCGTCTCGTCTCCCGCCCCGTTCC	67.128	GAGGAGGAGGAGGAGGAGG	GAGGAGGAGGAGGAGGAGG;GAGGAGGAGGAGG;GAGGAGGAGGAGGAGG;GAGGAGGAGGAGGAGGAGGAGG;GAGGAGGAGGAGGAGGAGGAGGAGG;GAGGAGGAGGAGGAGGAGGAGGAGGAGGAGGAGG	GAGGAGGAGGAGGAGGAGG/GAGGAGGAGGAGGAGGAGG	GAGGAGGAGGAGGAGGAGG/GAGGAGGAGGAGGAGGAGG	GAGGAGGAGGAGGAGGAGG/GAGGAGGAGGAGGAGGAGG	GAGGAGGAGGAGGAGGAGG/GAGGAGGAGGAGGAGGAGG	GAGGAGGAGGAGGAGG/GAGGAGGAGGAGGAGGAGG	GAGGAGGAGGAGGAGG/GAGGAGGAGGAGGAGG	GAGGAGGAGGAGGAGG/GAGGAGGAGGAGGAGG	GAGGAGGAGGAGGAGG/GAGGAGGAGGAGGAGG	GAGGAGGAGGAGGAGGAGG/GAGGAGGAGGAGGAGGAGG	GAGGAGGAGGAGGAGG/GAGGAGGAGGAGGAGGAGG	GAGGAGGAGGAGGAGGAGGAGG/GAGGAGGAGGAGGAGGAGGAGGAGG	GAGGAGGAGGAGGAGGAGG/GAGGAGGAGGAGGAGGAGG	GAGGAGGAGGAGGAGG/GAGGAGGAGGAGGAGG	GAGGAGGAGGAGGAGGAGG/GAGGAGGAGGAGGAGGAGG	GAGGAGGAGGAGGAGG/GAGGAGGAGGAGGAGGAGG	GAGGAGGAGGAGGAGGAGG/GAGGAGGAGGAGGAGGAGG	GAGGAGGAGGAGGAGGAGG/GAGGAGGAGGAGGAGGAGG	GAGGAGGAGGAGGAGGAGGAGGAGGAGGAGGAGG/GAGGAGGAGGAGGAGGAGGAGGAGGAGGAGGAGG	GAGGAGGAGGAGGAGGAGG/GAGGAGGAGGAGGAGGAGG	GAGGAGGAGGAGGAGGAGG/GAGGAGGAGGAGGAGGAGG	GAGGAGGAGGAGGAGGAGG/GAGGAGGAGGAGGAGGAGG	GAGGAGGAGGAGGAGGAGG/GAGGAGGAGGAGGAGGAGG	GAGGAGGAGGAGGAGG/GAGGAGGAGGAGGAGGAGG	GAGGAGGAGGAGGAGGAGG/GAGGAGGAGGAGGAGGAGG	GAGGAGGAGGAGGAGGAGG/GAGGAGGAGGAGGAGGAGG	GAGGAGGAGGAGGAGGAGG/GAGGAGGAGGAGGAGGAGG	GAGGAGGAGGAGGAGG/GAGGAGGAGGAGGAGGAGG	GAGGAGGAGGAGGAGGAGG/GAGGAGGAGGAGGAGGAGG	GAGGAGGAGGAGGAGGAGG/GAGGAGGAGGAGGAGGAGG	GAGGAGGAGGAGGAGGAGG/GAGGAGGAGGAGGAGGAGG	GAGGAGGAGGAGGAGGAGG/GAGGAGGAGGAGGAGGAGG	GAGGAGGAGGAGGAGG/GAGGAGGAGGAGGAGG	GAGGAGGAGGAGGAGGAGG/GAGGAGGAGGAGGAGGAGG	GAGGAGGAGGAGGAGGAGGAGG/GAGGAGGAGGAGGAGGAGGAGGAGG	GAGGAGGAGGAGGAGGAGG/GAGGAGGAGGAGGAGGAGG	GAGGAGGAGGAGGAGGAGG/GAGGAGGAGGAGGAGGAGG	GAGGAGGAGGAGG/GAGGAGGAGGAGGAGG	GAGGAGGAGGAGGAGG/GAGGAGGAGGAGGAGGAGG	GAGGAGGAGGAGGAGGAGG/GAGGAGGAGGAGGAGGAGG	GAGGAGGAGGAGGAGGAGG/GAGGAGGAGGAGGAGGAGG	GAGGAGGAGGAGGAGGAGG/GAGGAGGAGGAGGAGGAGG
Xunr27	2	4889269	AAAGAAAAACCGGGAAAACACGCCGGCTCCGCCTCACTCG	61.381	GCAGGAGCGCGTGAAGCGGAGGAAGTGTGGCGGTCGGAAG	64.504	GCCGCCTGCCGCCGCCTGCCGCCG	GCCGCCTGCCGCCGCCTGCC;GCCGCCTGCCGCCGCCTGCCGC;GCCGCCTGCCGCCGCCTGCCGCC;GCCGCCTGCCGCCGCCTGCCGCCGGCCGCCGCC;GCCGCCTGCCGCCGCCTGCCGCCGGCCGCCGCCG;GCCGCCTGCCGCCGCCTGCCGCCGGCCGCCGCCGC;GCCGCCTGCCGCCGCCTGCCGCCGGCCGCCGCCGCC;GCCGCCTGCCGCCGCCTGCCGCCGGCCGCCGCCGCCG;GCCGCCTGCCGCCGCCTGCCGCCGGCCGCCGCCGCCGCCGCCGC;GCCGCCTGCCGCCGCCTGCCGCCGGCCGCCGCCGCCGCCGCCGCCGCCGC;GCCGCCTGCCGCCGCCTGCCGCCGGCCGCCGCCGCCGCCGCCGCCGCCGCC	GCCGCCTGCCGCCGCCTGCCGCCGGCCGCCGCCGCCG/GCCGCCTGCCGCCGCCTGCCGCCGGCCGCCGCCGCCG	GCCGCCTGCCGCCGCCTGCCGCCG/GCCGCCTGCCGCCGCCTGCCGCCGGCCGCCGCCGCCGCCGCCGC	GCCGCCTGCCGCCGCCTGCCGCCG/GCCGCCTGCCGCCGCCTGCCGCCG	GCCGCCTGCCGCCGCCTGCCGCCGGCCGCCGCCG/GCCGCCTGCCGCCGCCTGCCGCCGGCCGCCGCCG	GCCGCCTGCCGCCGCCTGCCGCCGGCCGCCGCCGCCGCCGCCGC/GCCGCCTGCCGCCGCCTGCCGCCGGCCGCCGCCGCCGCCGCCGC	GCCGCCTGCCGCCGCCTGCCGCCGGCCGCCGCCG/GCCGCCTGCCGCCGCCTGCCGCCGGCCGCCGCCG	./.	./.	GCCGCCTGCCGCCGCCTGCCGCCG/GCCGCCTGCCGCCGCCTGCCGCCG	GCCGCCTGCCGCCGCCTGCCGCCGGCCGCCGCCGCCGCCGCCGC/GCCGCCTGCCGCCGCCTGCCGCCGGCCGCCGCCGCCGCCGCCGC	GCCGCCTGCCGCCGCCTGCCGCCGGCCGCCGCCGCCGCCGCCGCCGCCGC/GCCGCCTGCCGCCGCCTGCCGCCGGCCGCCGCCGCCGCCGCCGCCGCCGC	GCCGCCTGCCGCCGCCTGCCGCCG/GCCGCCTGCCGCCGCCTGCCGCCGGCCGCCGCCGCCGCCGCCGCCGCCGC	GCCGCCTGCCGCCGCCTGCCGCCGGCCGCCGCCGCC/GCCGCCTGCCGCCGCCTGCCGCCGGCCGCCGCCGCC	GCCGCCTGCCGCCGCCTGCCGCCG/GCCGCCTGCCGCCGCCTGCCGCCGGCCGCCGCCGCCGCCGCCGCCGCCGCC	GCCGCCTGCCGCCGCCTGCCGCCG/GCCGCCTGCCGCCGCCTGCCGCCG	./.	GCCGCCTGCCGCCGCCTGCCGCCGGCCGCCGCCGCCGCCGCCGC/GCCGCCTGCCGCCGCCTGCCGCCGGCCGCCGCCGCCGCCGCCGC	./.	GCCGCCTGCCGCCGCCTGCCGCCG/GCCGCCTGCCGCCGCCTGCCGCCG	GCCGCCTGCCGCCGCCTGCCGCCGGCCGCCGCCGCCG/GCCGCCTGCCGCCGCCTGCCGCCGGCCGCCGCCGCCG	GCCGCCTGCCGCCGCCTGCCGCCG/GCCGCCTGCCGCCGCCTGCCGCCG	GCCGCCTGCCGCCGCCTGCCGCCG/GCCGCCTGCCGCCGCCTGCCGCCG	GCCGCCTGCCGCCGCCTGCCGCCG/GCCGCCTGCCGCCGCCTGCCGCCG	GCCGCCTGCCGCCGCCTGCCGCCG/GCCGCCTGCCGCCGCCTGCCGCCG	GCCGCCTGCCGCCGCCTGCCGCCG/GCCGCCTGCCGCCGCCTGCCGCCG	./.	./.	./.	GCCGCCTGCCGCCGCCTGCCGCCG/GCCGCCTGCCGCCGCCTGCCGCCG	./.	./.	GCCGCCTGCCGCCGCCTGCCGCCGGCCGCCGCCGCC/GCCGCCTGCCGCCGCCTGCCGCCGGCCGCCGCCGCC	GCCGCCTGCCGCCGCCTGCCGCCG/GCCGCCTGCCGCCGCCTGCCGCCG	GCCGCCTGCCGCCGCCTGCCGCCG/GCCGCCTGCCGCCGCCTGCCGCCG	GCCGCCTGCCGCCGCCTGCCGCCGGCCGCCGCCGCCG/GCCGCCTGCCGCCGCCTGCCGCCGGCCGCCGCCGCCG	GCCGCCTGCCGCCGCCTGCCGCCG/GCCGCCTGCCGCCGCCTGCCGCCG	GCCGCCTGCCGCCGCCTGCCGCCGGCCGCCGCCGCCG/GCCGCCTGCCGCCGCCTGCCGCCGGCCGCCGCCGCCG	GCCGCCTGCCGCCGCCTGCCGCCGGCCGCCGCCGCCGCCGCCGCCGCCGCC/GCCGCCTGCCGCCGCCTGCCGCCGGCCGCCGCCGCCGCCGCCGCCGCCGCC	./.	GCCGCCTGCCGCCGCCTGCCGCCGGCCGCCGCCGCCGCCGCCGC/GCCGCCTGCCGCCGCCTGCCGCCGGCCGCCGCCGCCGCCGCCGC	GCCGCCTGCCGCCGCCTGCCGCCG/GCCGCCTGCCGCCGCCTGCCGCCG
Xunr28	2	5969172	GTCTAGATTCGGTAGAAGGCGGTGGTGGCGGCGAGGAAGG	61.116	ACATCTACTAGCTCTAGAGTCCCACCACCTACAAATCTGC	54.017	TCTCTCTCTCTCTCTC	TCTCTCTCTC;TCTCTCTCTCTC;TCTCTCTCTCTCTC;TCTCTCTCTCTCTCTCTC;TCTCTCTCTCTCTCTCTCTC;TCTCTCTCTCTCTCTCTCTCTC;TCTCTCTCTCTCTCTCTCTCTCTCTC;TCTCTCTCTCTCTCTCTCTCTCTCTCTC	TCTCTCTCTCTC/TCTCTCTCTCTCTC	TCTCTCTCTCTCTC/TCTCTCTCTCTCTCTC	TCTCTCTCTCTCTC/TCTCTCTCTCTCTCTC	TCTCTCTCTCTC/TCTCTCTCTCTC	TCTCTCTCTCTCTC/TCTCTCTCTCTCTCTC	TCTCTCTCTCTCTC/TCTCTCTCTCTCTCTC	TCTCTCTCTCTCTC/TCTCTCTCTCTCTCTC	TCTCTCTCTCTCTCTCTCTCTCTCTC/TCTCTCTCTCTCTCTCTCTCTCTCTCTC	TCTCTCTCTCTCTC/TCTCTCTCTCTCTCTC	TCTCTCTCTCTCTC/TCTCTCTCTCTCTCTC	TCTCTCTCTCTCTC/TCTCTCTCTCTCTCTC	TCTCTCTCTCTCTC/TCTCTCTCTCTCTCTC	TCTCTCTCTCTCTC/TCTCTCTCTCTCTCTCTCTCTCTCTCTC	TCTCTCTCTC/TCTCTCTCTCTCTCTC	TCTCTCTCTCTCTCTC/TCTCTCTCTCTCTCTC	TCTCTCTCTCTCTC/TCTCTCTCTCTCTCTC	TCTCTCTCTCTCTC/TCTCTCTCTCTCTCTC	TCTCTCTCTCTCTC/TCTCTCTCTCTCTCTC	TCTCTCTCTCTCTC/TCTCTCTCTCTCTCTC	TCTCTCTCTCTCTCTCTC/TCTCTCTCTCTCTCTCTCTC	TCTCTCTCTCTCTC/TCTCTCTCTCTCTCTC	TCTCTCTCTCTCTC/TCTCTCTCTCTCTCTC	TCTCTCTCTCTCTC/TCTCTCTCTCTCTCTC	TCTCTCTCTCTCTC/TCTCTCTCTCTCTCTC	TCTCTCTCTCTCTC/TCTCTCTCTCTCTCTC	TCTCTCTCTCTCTC/TCTCTCTCTCTCTCTC	TCTCTCTCTCTCTC/TCTCTCTCTCTCTCTC	TCTCTCTCTCTCTC/TCTCTCTCTCTCTCTC	TCTCTCTCTCTCTC/TCTCTCTCTCTCTCTC	TCTCTCTCTCTC/TCTCTCTCTCTC	TCTCTCTCTCTCTC/TCTCTCTCTCTCTCTC	TCTCTCTCTCTCTCTCTC/TCTCTCTCTCTCTCTCTC	TCTCTCTCTCTCTC/TCTCTCTCTCTCTCTC	TCTCTCTCTCTCTC/TCTCTCTCTCTCTCTC	TCTCTCTCTCTCTC/TCTCTCTCTCTCTCTC	TCTCTCTCTCTCTC/TCTCTCTCTCTCTCTC	TCTCTCTCTCTCTC/TCTCTCTCTCTCTC	TCTCTCTCTCTC/TCTCTCTCTCTCTC	TCTCTCTCTCTCTC/TCTCTCTCTCTCTCTC	TCTCTCTCTCTCTC/TCTCTCTCTCTCTCTC	TCTCTCTCTCTCTC/TCTCTCTCTCTCTCTC
Xunr29	2	8042846	GGGAGAGAGGAGAAGGAGATGGCGCAGGGAGAGAGGAGAG	59.466	AATACAGAGGCACATCTGAATCAAGAAAGAACAGCCTAAG	52.075	AGAGAGAGAGAGAGAGAGAGAGAGAGAGAGAGAGAGAGAGAG	AGAGAGA;AGAGAGAGAGAGAG;AGAGAGAGAGAGAGAGAGAG;AGAGAGAGAGAGAGAGAGAGAG;AGAGAGAGAGAGAGAGAGAGAGAGAG;AGAGAGAGAGAGAGAGAGAGAGAGAGA;AGAGAGAGAGAGAGAGAGAGAGAGAGAG;AGAGAGAGAGAGAGAGAGAGAGAGAGAGA;AGAGAGAGAGAGAGAGAGAGAGAGAGAGAG;AGAGAGAGAGAGAGAGAGAGAGAGAGAGAGAG;AGAGAGAGAGAGAGAGAGAGAGAGAGAGAGAGAG;AGAGAGAGAGAGAGAGAGAGAGAGAGAGAGAGAGAG;AGAGAGAGAGAGAGAGAGAGAGAGAGAGAGAGAGAGAG;AGAGAGAGAGAGAGAGAGAGAGAGAGAGAGAGAGAGAGA;AGA…	AGAGAGAGAGAGAGAGAGAGAGAGAGA/AGAGAGAGAGAGAGAGAGAGAGAGAGAGA	AGAGAGAGAGAGAGAGAGAGAGAGAGAGAGAGAGAGAGAG/AGAGAGAGAGAGAGAGAGAGAGAGAGAGAGAGAGAGAGAG	AGAGAGAGAGAGAGAGAGAGAGAGAGAGAGAG/AGAGAGAGAGAGAGAGAGAGAGAGAGAGAGAGAGAGAGAGAGAG	AGAGAGAGAGAGAGAGAGAGAGAGAGAGAGAGAG/AGAGAGAGAGAGAGAGAGAGAGAGAGAGAGAGAGAGAGAG	AGAGAGAGAGAGAGAGAGAGAGAGAGAGAGAGAGAGAG/AGAGAGAGAGAGAGAGAGAGAGAGAGAGAGAGAGAGAGAG	AGAGAGAGAGAGAGAGAGAGAGAGAGAGAGAGAGAGAGAG/AGAGAGAGAGAGAGAGAGAGAGAGAGAGAGAGAGAGAGAGAG	./.	AGAGAGAGAGAGAGAGAGAGAGAGAGAGAGAGAGAGAGAGAG/AGAGAGAGAGAGAGAGAGAGAGAGAGAGAGAGAGAGAGAGAG	AGAGAGAGAGAGAGAGAGAGAGAGAGAGAGAGAGAGAG/AGAGAGAGAGAGAGAGAGAGAGAGAGAGAGAGAGAGAGAG	AGAGAGAGAGAGAGAGAGAGAGAGAGAGAG/AGAGAGAGAGAGAGAGAGAGAGAGAGAGAGAG	AGAGAGAGAGAGAGAGAGAGAGAGAGAGAGAGAGAGAGAGAG/AGAGAGAGAGAGAGAGAGAGAGAGAGAGAGAGAGAGAGAGAG	AGAGAGAGAGAGAGAGAGAGAGAGAGAGAGAGAGAGAG/AGAGAGAGAGAGAGAGAGAGAGAGAGAGAGAGAGAGAGAGAG	AGAGAGAGAGAGAGAGAGAGAGAGAGAGAGAGAGAGAGA/AGAGAGAGAGAGAGAGAGAGAGAGAGAGAGAGAGAGAGAGA	AGAGAGAGAGAGAGAGAGAGAGAGAGAGAGAGAGAG/AGAGAGAGAGAGAGAGAGAGAGAGAGAGAGAGAGAGAG	./.	AGAGAGAGAGAGAGAGAGAGAGAGAGAGAGAGAG/AGAGAGAGAGAGAGAGAGAGAGAGAGAGAGAGAGAGAG	./.	AGAGAGAGAGAGAGAGAGAGAGAGAGAGAGAGAGAGAGAG/AGAGAGAGAGAGAGAGAGAGAGAGAGAGAGAGAGAGAGAG	AGAGAGAGAGAGAGAGAGAGAGAGAGAGAGAG/AGAGAGAGAGAGAGAGAGAGAGAGAGAGAGAG	./.	AGAGAGAGAGAGAGAGAGAGAGAGAGAGAGAGAGAG/AGAGAGAGAGAGAGAGAGAGAGAGAGAGAGAGAGAGAGAGAG	AGAGAGAGAGAGAGAGAGAGAGAGAGAGAGAGAGAGAGAG/AGAGAGAGAGAGAGAGAGAGAGAGAGAGAGAGAGAGAGAG	AGAGAGAGAGAGAGAGAGAGAGAGAGAGAGAGAGAGAGAG/AGAGAGAGAGAGAGAGAGAGAGAGAGAGAGAGAGAGAGAGAG	AGAGAGAGAGAGAGAGAGAGAGAGAGAGAGAGAG/AGAGAGAGAGAGAGAGAGAGAGAGAGAGAGAGAGAGAGAG	AGAGAGAGAGAGAGAGAGAGAGAGAGAGAGAGAGAGAGAG/AGAGAGAGAGAGAGAGAGAGAGAGAGAGAGAGAGAGAGAG	./.	./.	AGAGAGAGAGAGAGAGAGAGAGAGAGAG/AGAGAGAGAGAGAGAGAGAGAGAGAGAGAGAGAGAGAG	AGAGAGAGAGAGAGAGAGAGAGAGAGAGAGAGAGAGAG/AGAGAGAGAGAGAGAGAGAGAGAGAGAGAGAGAGAGAGAGAG	./.	./.	AGAGAGAGAGAGAGAGAGAGAGAGAGAGAGAGAGAGAGA/AGAGAGAGAGAGAGAGAGAGAGAGAGAGAGAGAGAGAGAGA	AGAGAGAGAGAGAGAGAGAGAGAGAGAGAGAGAGAG/AGAGAGAGAGAGAGAGAGAGAGAGAGAGAGAGAGAGAG	AGAGAGAGAGAGAGAGAGAGAGAGAGAGAGAGAG/AGAGAGAGAGAGAGAGAGAGAGAGAGAGAGAGAGAGAG	./.	AGAGAGAGAGAGAGAGAGAGAGAGAGAGAGAGAGAGAGAG/AGAGAGAGAGAGAGAGAGAGAGAGAGAGAGAGAGAGAGAGAG	AGAGAGAGAGAGAGAGAGAGAGAGAGA/AGAGAGAGAGAGAGAGAGAGAGAGAGAGA	AGAGAGAGAGAGAGAGAGAGAGAGAG/AGAGAGAGAGAGAGAGAGAGAGAGAG	AGAGAGAGAGAGAGAGAGAGAGAGAGAGAG/AGAGAGAGAGAGAGAGAGAGAGAGAGAGAGAG	./.	AGAGAGAGAGAGAGAGAGAGAGAGAGAGAG/AGAGAGAGAGAGAGAGAGAGAGAGAGAGAGAGAGAGAGAG
Xunr30	2	8089739	GGGAGGGACCGGGACAGAGAGAGGAAGGGGAGGGATAAAC	59.528	GCAGCGACGACCACGAGCAGGGGCGTGGCGGCGGCGACGG	70.424	GAGGAGGAGGAGGAGGAGGAGGAGGAGGAGGAGGAGG	GAGG;GAGGAGGAGGAGGAGG;GAGGAGGAGGAGGAGGAGG;GAGGAGGAGGAGGAGGAGGAGG;GAGGAGGAGGAGGAGGAGGAGGAGG;GAGGAGGAGGAGGAGGAGGAGGAGGAGG;GAGGAGGAGGAGGAGGAGGAGGAGGAGGAGG;GAGGAGGAGGAGGAGGAGGAGGAGGAGGAGGAG;GAGGAGGAGGAGGAGGAGGAGGAGGAGGAGGAGG;GAGGAGGAGGAGGAGGAGGAGGAGGAGGAGGAGGAGGAGG	GAGGAGGAGGAGGAGGAGGAGGAGG/GAGGAGGAGGAGGAGGAGGAGGAGG	GAGGAGGAGGAGGAGGAGGAGG/GAGGAGGAGGAGGAGGAGGAGGAGG	GAGGAGGAGGAGGAGGAGGAGG/GAGGAGGAGGAGGAGGAGGAGGAGG	./.	GAGGAGGAGGAGGAGGAGGAGG/GAGGAGGAGGAGGAGGAGGAGGAGG	GAGGAGGAGGAGGAGGAGGAGGAGGAGG/GAGGAGGAGGAGGAGGAGGAGGAGGAGGAGG	GAGGAGGAGGAGGAGGAGG/GAGGAGGAGGAGGAGGAGG	./.	GAGGAGGAGGAGGAGGAGGAGGAGG/GAGGAGGAGGAGGAGGAGGAGGAGG	GAGGAGGAGGAGGAGGAGGAGGAGG/GAGGAGGAGGAGGAGGAGGAGGAGG	GAGGAGGAGGAGGAGGAGGAGGAGG/GAGGAGGAGGAGGAGGAGGAGGAGG	GAGGAGGAGGAGGAGGAGGAGGAGG/GAGGAGGAGGAGGAGGAGGAGGAGG	./.	GAGGAGGAGGAGGAGGAGGAGGAGG/GAGGAGGAGGAGGAGGAGGAGGAGGAGGAGGAGGAGG	./.	GAGGAGGAGGAGGAGGAGGAGGAGG/GAGGAGGAGGAGGAGGAGGAGGAGG	GAGGAGGAGGAGGAGGAGGAGGAGG/GAGGAGGAGGAGGAGGAGGAGGAGG	GAGGAGGAGGAGGAGGAGGAGGAGG/GAGGAGGAGGAGGAGGAGGAGGAGG	GAGGAGGAGGAGGAGGAGGAGG/GAGGAGGAGGAGGAGGAGGAGGAGG	GAGGAGGAGGAGGAGGAGGAGGAGG/GAGGAGGAGGAGGAGGAGGAGGAGGAGG	GAGGAGGAGGAGGAGGAGGAGGAGGAGGAGGAGG/GAGGAGGAGGAGGAGGAGGAGGAGGAGGAGGAGGAGG	GAGGAGGAGGAGGAGGAGGAGGAGGAGGAGGAGG/GAGGAGGAGGAGGAGGAGGAGGAGGAGGAGGAGGAGG	GAGGAGGAGGAGGAGGAGGAGGAGG/GAGGAGGAGGAGGAGGAGGAGGAGG	GAGGAGGAGGAGGAGGAGGAGG/GAGGAGGAGGAGGAGGAGGAGGAGG	GAGGAGGAGGAGGAGGAGGAGGAGGAGGAGGAGG/GAGGAGGAGGAGGAGGAGGAGGAGGAGGAGGAGG	GAGGAGGAGGAGGAGGAGGAGG/GAGGAGGAGGAGGAGGAGGAGGAGG	GAGGAGGAGGAGGAGGAGGAGG/GAGGAGGAGGAGGAGGAGGAGGAGG	GAGGAGGAGGAGGAGGAGGAGGAGG/GAGGAGGAGGAGGAGGAGGAGGAGG	GAGGAGGAGGAGGAGGAGGAGG/GAGGAGGAGGAGGAGGAGGAGGAGGAGG	GAGGAGGAGGAGGAGGAGG/GAGGAGGAGGAGGAGGAGG	GAGGAGGAGGAGGAGGAGGAGGAGG/GAGGAGGAGGAGGAGGAGGAGGAGG	GAGGAGGAGGAGGAGGAGGAGG/GAGGAGGAGGAGGAGGAGGAGG	GAGGAGGAGGAGGAGGAGGAGG/GAGGAGGAGGAGGAGGAGGAGGAGG	GAGGAGGAGGAGGAGGAGGAGG/GAGGAGGAGGAGGAGGAGGAGGAGG	GAGGAGGAGGAGGAGGAGGAGGAGG/GAGGAGGAGGAGGAGGAGGAGGAGG	GAGGAGGAGGAGGAGGAGGAGGAGG/GAGGAGGAGGAGGAGGAGGAGGAGG	GAGGAGGAGGAGGAGG/GAGGAGGAGGAGGAGG	GAGGAGGAGGAGGAGGAGG/GAGGAGGAGGAGGAGGAGG	GAGGAGGAGGAGGAGGAGGAGGAGGAGGAGGAGGAGG/GAGGAGGAGGAGGAGGAGGAGGAGGAGGAGGAGGAGG	GAGGAGGAGGAGGAGGAGGAGGAGG/GAGGAGGAGGAGGAGGAGGAGGAGG	GAGGAGGAGGAGGAGGAGGAGGAGGAGGAGG/GAGGAGGAGGAGGAGGAGGAGGAGGAGGAGGAGGAGG
Xunr31	2	8414025	ACAGCAAGAGAATTTATTTCTGAGAACGTGTATTAGTTGG	50.199	GGCTGAGCGATCTCTTTACAGAAGATACATGCTACCAGAG	54.092	AGAGAGAGAGAGAGAGA	AGAGAGAGAGA;AGAGAGAGAGAGA;AGAGAGAGAGAGAGA;AGAGAGAGAGAGAGAGAGA;AGAGAGAGAGAGAGAGAGAGA;AGAGAGAGAGAGAGAGAGAGAGA;AGAGAGAGAGAGAGAGAGAGAGAGA;AGAGAGAGAGAGAGAGAGAGAGAGAG;AGAGAGAGAGAGAGAGAGAGAGAGAGA;AGAGAGAGAGAGAGAGAGAGAGAGAGAGA;AGAGAGAGAGAGAGAGAGAGAGAGAGAGAGA;AGAGAGAGAGAGAGAGAGAGAGAGAGAGAGAGA;AGAGAGAGAGAGAGAGAGAGAGAGAGAGAGAGAGA;AGAGAGAGAGAGAGAGAGAGAGAGAGAGAGAGAGAGA;AGAGAGAGAGAGAGAGAGAGAGAGAGAGAGAGAGAGAGA;…	AGAGAGAGAGAGAGAGAGAGAGAGAGAGA/AGAGAGAGAGAGAGAGAGAGAGAGAGAGA	AGAGAGAGAGAGAGAGA/AGAGAGAGAGAGAGAGAGAGAGAGAGAGAGAGAGAGA	AGAGAGAGAGAGAGA/AGAGAGAGAGAGAGAGAGAGAGAGAGAGAGAGA	AGAGAGAGAGAGAGA/AGAGAGAGAGAGAGAGA	./.	AGAGAGAGAGAGAGA/AGAGAGAGAGAGAGAGA	AGAGAGAGAGAGAGAGAGAGAGAGAGAGAGAGAGAGAGA/AGAGAGAGAGAGAGAGAGAGAGAGAGAGAGAGAGAGAGA	AGAGAGAGAGAGAGAGAGAGAGAGAG/AGAGAGAGAGAGAGAGAGAGAGAGAGA	AGAGAGAGAGAGAGA/AGAGAGAGAGAGAGAGA	AGAGAGAGAGAGAGA/AGAGAGAGAGAGAGAGA	AGAGAGAGAGAGAGAGAGA/AGAGAGAGAGAGAGAGAGAGAGAGAGAGAGAGA	AGAGAGAGAGAGAGAGAGAGAGAGAGAGA/AGAGAGAGAGAGAGAGAGAGAGAGAGAGAGA	AGAGAGAGAGAGAGAGAGAGAGAGA/AGAGAGAGAGAGAGAGAGAGAGAGAGAGA	AGAGAGAGAGAGA/AGAGAGAGAGAGAGAGAGAGAGAGAGAGAGAGA	./.	AGAGAGAGAGAGAGA/AGAGAGAGAGAGAGAGA	AGAGAGAGAGAGAGAGA/AGAGAGAGAGAGAGAGA	AGAGAGAGAGAGAGAGAGAGAGAGAGAGAGAGA/AGAGAGAGAGAGAGAGAGAGAGAGAGAGAGAGAGA	AGAGAGAGAGAGAGAGA/AGAGAGAGAGAGAGAGAGAGAGAGAGAGAGAGA	AGAGAGAGAGAGAGAGAGAGAGAGA/AGAGAGAGAGAGAGAGAGAGAGAGAGAGAGAGAGA	AGAGAGAGAGAGAGAGAGA/AGAGAGAGAGAGAGAGAGAGAGAGAGAGAGAGA	AGAGAGAGAGAGAGAGA/AGAGAGAGAGAGAGAGA	AGAGAGAGAGAGAGAGAGAGAGAGAGAGA/AGAGAGAGAGAGAGAGAGAGAGAGAGAGAGAGAGA	AGAGAGAGAGAGAGAGA/AGAGAGAGAGAGAGAGAGAGAGAGAGAGAGAGAGA	AGAGAGAGAGAGAGA/AGAGAGAGAGAGAGAGAGAGAGAGAGAGA	./.	./.	AGAGAGAGAGAGAGAGAGAGAGAGAGAGAGA/AGAGAGAGAGAGAGAGAGAGAGAGAGAGAGAGA	./.	AGAGAGAGAGAGAGAGAGAGA/AGAGAGAGAGAGAGAGAGAGAGAGAGAGAGAGAGAGAGA	AGAGAGAGAGAGAGAGAGAGAGAGAGAGAGAGAGAGAGA/AGAGAGAGAGAGAGAGAGAGAGAGAGAGAGAGAGAGAGA	AGAGAGAGAGAGAGAGAGAGAGAGAGA/AGAGAGAGAGAGAGAGAGAGAGAGAGAGAGA	AGAGAGAGAGAGAGAGAGAGAGAGAGAGAGA/AGAGAGAGAGAGAGAGAGAGAGAGAGAGAGAGA	AGAGAGAGAGAGAGAGAGAGAGAGAGA/AGAGAGAGAGAGAGAGAGAGAGAGAGAGA	AGAGAGAGAGAGAGAGAGAGAGAGAGAGA/AGAGAGAGAGAGAGAGAGAGAGAGAGAGAGAGA	AGAGAGAGAGAGAGAGA/AGAGAGAGAGAGAGAGAGAGAGAGAGAGAGA	AGAGAGAGAGAGAGAGAGAGAGAGAGA/AGAGAGAGAGAGAGAGAGAGAGAGAGAGA	AGAGAGAGAGAGAGAGAGAGAGAGAGAGAGAGAGA/AGAGAGAGAGAGAGAGAGAGAGAGAGAGAGAGAGAGA	AGAGAGAGAGAGAGAGAGAGAGAGAGAGAGAGA/AGAGAGAGAGAGAGAGAGAGAGAGAGAGAGAGA	AGAGAGAGAGAGAGAGA/AGAGAGAGAGAGAGAGAGAGAGAGAGAGAGAGA	AGAGAGAGAGAGAGA/AGAGAGAGAGAGAGAGA
Xunr32	2	13553642	AAGCTATCGGATATATTCTATTTTCTAAAAAGTTACTCAC	45.933	TATAATGATACAGATGGACAATTTAGATACAAACTTAGAG	45.394	ATATATATATATATA	ATATATATATA;ATATATATATATA;ATATATATATATAT;ATATATATATATATATA;ATATATATATATATATATAT;ATATATATATATATATATATA;ATATATATATATATATATATATATATAT;ATATATATATATATATATATATATATATA;ATATATATATATATATATATATATATATATATATATATAT;ATATATATATATATATATATATATATATATATATATATATAT;ATATATATATATATATATATATATATATATATATATATATATAT;ATATATATATATATATATATATATATATATATATATATATATATAT	./.	ATATATATATATATATATATATATATATA/ATATATATATATATATATATATATATATA	ATATATATATATATA/ATATATATATATATA	ATATATATATATATA/ATATATATATATATA	ATATATATATATA/ATATATATATATATA	ATATATATATATA/ATATATATATATATA	ATATATATATATATA/ATATATATATATATA	./.	ATATATATATATATA/ATATATATATATATA	ATATATATATATA/ATATATATATATA	./.	ATATATATATATATA/ATATATATATATATA	ATATATATATATATATATATATATATATA/ATATATATATATATATATATATATATATA	ATATATATATATATA/ATATATATATATATA	ATATATATATATATA/ATATATATATATATA	ATATATATATATATA/ATATATATATATATA	./.	ATATATATATATA/ATATATATATATATA	ATATATATATATATA/ATATATATATATATA	ATATATATATATATA/ATATATATATATATA	ATATATATATATATA/ATATATATATATATA	ATATATATATATATA/ATATATATATATATA	ATATATATATATA/ATATATATATATA	./.	./.	ATATATATATATATA/ATATATATATATATA	./.	ATATATATATATATA/ATATATATATATATA	ATATATATATATATA/ATATATATATATATA	ATATATATATATATA/ATATATATATATATA	./.	./.	ATATATATATATATA/ATATATATATATATA	./.	ATATATATATATATA/ATATATATATATATA	ATATATATATATATA/ATATATATATATATA	./.	ATATATATATATA/ATATATATATATATA	ATATATATATATATA/ATATATATATATATA	ATATATATATATATA/ATATATATATATATA	ATATATATATATATA/ATATATATATATATA
Xunr33	2	16196849	GCTTCTACACCTGACCACTGATTACTTGTAGATAAACTTG	50.959	CTAAAGTACATCGAGTGACTTCACTATAACTTCTTATGAC	48.281	ATATATATATATATATATATA	ATATATATATATATA;ATATATATATATATATA;ATATATATATATATATATA;ATATATATATATATATATATATA	./.	ATATATATATATATATATATA/ATATATATATATATATATATA	./.	ATATATATATATATATATA/ATATATATATATATATATATA	./.	./.	ATATATATATATATATATA/ATATATATATATATATATATA	./.	./.	./.	./.	./.	./.	ATATATATATATATATATA/ATATATATATATATATATATA	./.	ATATATATATATATATA/ATATATATATATATATATATA	ATATATATATATATATA/ATATATATATATATATA	./.	./.	./.	./.	ATATATATATATATATATATA/ATATATATATATATATATATATA	./.	./.	./.	./.	./.	./.	./.	./.	./.	./.	./.	ATATATATATATATATATATA/ATATATATATATATATATATA	./.	./.	ATATATATATATATATA/ATATATATATATATATATA	./.	ATATATATATATATATA/ATATATATATATATATATA	ATATATATATATATATA/ATATATATATATATATATA	ATATATATATATATATATA/ATATATATATATATATATATA
Xunr34	2	19847938	ATCTTTGTCAGATGGAAATTAGTTGGTGATAAATTACTTG	47.86	GATCCAAGCATGCCCATCGGAGATTCGTCTGCTTCTCTGC	58.529	TTATTTTATTTTATTTTATTTTATTTTATTTTATTTTATTTT	TTATTTTATTTTATTTT;TTATTTTATTTTATTTTATTTT;TTATTTTATTTTATTTTATTTTATTT;TTATTTTATTTTATTTTATTTTATTTT;TTATTTTATTTTATTTTATTTTATTTTATTT;TTATTTTATTTTATTTTATTTTATTTTATTTT;TTATTTTATTTTATTTTATTTTATTTTATTTTATTTT;TTATTTTATTTTATTTTATTTTATTTTATTTTATTTTATTT;TTATTTTATTTTATTTTATTTTATTTTATTTTATTTTATTTTATTTT;TTATTTTATTTTATTTTATTTTATTTTATTTTATTTTATTTTATTTTATTTTATTTTATTTTATT;TTATTTTATTTTATTTTATTTTATTTTATTTTATTTTATTTTAT…	TTATTTTATTTTATTTTATTTTATTTTATTTTATTTT/TTATTTTATTTTATTTTATTTTATTTTATTTTATTTTATTTT	TTATTTTATTTTATTTTATTTTATTTTATTTTATTTT/TTATTTTATTTTATTTTATTTTATTTTATTTTATTTT	TTATTTTATTTTATTTTATTTTATTTTATTTT/TTATTTTATTTTATTTTATTTTATTTTATTTT	TTATTTTATTTTATTTTATTTTATTTTATTTT/TTATTTTATTTTATTTTATTTTATTTTATTTT	TTATTTTATTTTATTTTATTTTATTTTATTTTATTTT/TTATTTTATTTTATTTTATTTTATTTTATTTTATTTT	TTATTTTATTTTATTTTATTTTATTTTATTTTATTTT/TTATTTTATTTTATTTTATTTTATTTTATTTTATTTT	TTATTTTATTTTATTTTATTTTATTTTATTTT/TTATTTTATTTTATTTTATTTTATTTTATTTT	TTATTTTATTTTATTTTATTTTATTTTATTTTATTTT/TTATTTTATTTTATTTTATTTTATTTTATTTTATTTT	TTATTTTATTTTATTTTATTTTATTTTATTTTATTTT/TTATTTTATTTTATTTTATTTTATTTTATTTTATTTT	TTATTTTATTTTATTTTATTTTATTTTATTTTATTTTATTTT/TTATTTTATTTTATTTTATTTTATTTTATTTTATTTTATTTT	TTATTTTATTTTATTTTATTTTATTTTATTTT/TTATTTTATTTTATTTTATTTTATTTTATTTT	TTATTTTATTTTATTTTATTTTATTTTATTTT/TTATTTTATTTTATTTTATTTTATTTTATTTT	TTATTTTATTTTATTTTATTTTATTTTATTTTATTTT/TTATTTTATTTTATTTTATTTTATTTTATTTTATTTTATTTT	TTATTTTATTTTATTTTATTTTATTTT/TTATTTTATTTTATTTTATTTTATTTTATTTTATTTTATTTTATTTT	TTATTTTATTTTATTTTATTTT/TTATTTTATTTTATTTTATTTT	TTATTTTATTTTATTTTATTTT/TTATTTTATTTTATTTTATTTTATTTTATTTTATTTTATTTT	TTATTTTATTTTATTTTATTTT/TTATTTTATTTTATTTTATTTT	TTATTTTATTTTATTTTATTTT/TTATTTTATTTTATTTTATTTT	TTATTTTATTTTATTTTATTTTATTTTATTTT/TTATTTTATTTTATTTTATTTTATTTTATTTT	TTATTTTATTTTATTTTATTTT/TTATTTTATTTTATTTTATTTT	TTATTTTATTTTATTTTATTTT/TTATTTTATTTTATTTTATTTT	TTATTTTATTTTATTTTATTTTATTTTATTTTATTTTATTTT/TTATTTTATTTTATTTTATTTTATTTTATTTTATTTTATTTT	TTATTTTATTTTATTTTATTTTATTTTATTTTATTTTATTTT/TTATTTTATTTTATTTTATTTTATTTTATTTTATTTTATTTT	TTATTTTATTTTATTTTATTTT/TTATTTTATTTTATTTTATTTT	TTATTTTATTTTATTTTATTTTATTTTATTTTATTTTATTTT/TTATTTTATTTTATTTTATTTTATTTTATTTTATTTTATTTT	TTATTTTATTTTATTTTATTTT/TTATTTTATTTTATTTTATTTT	TTATTTTATTTTATTTTATTTTATTTTATTTTATTTT/TTATTTTATTTTATTTTATTTTATTTTATTTTATTTT	TTATTTTATTTTATTTT/TTATTTTATTTTATTTT	TTATTTTATTTTATTTTATTTTATTTTATTTTATTTT/TTATTTTATTTTATTTTATTTTATTTTATTTTATTTT	TTATTTTATTTTATTTTATTTT/TTATTTTATTTTATTTTATTTTATTTTATTTTATTTT	TTATTTTATTTTATTTTATTTT/TTATTTTATTTTATTTTATTTT	TTATTTTATTTTATTTTATTTTATTTTATTTTATTTTATTT/TTATTTTATTTTATTTTATTTTATTTTATTTTATTTTATTTT	TTATTTTATTTTATTTTATTTTATTTTATTTT/TTATTTTATTTTATTTTATTTTATTTTATTTT	TTATTTTATTTTATTTTATTTTATTTTATTTTATTTT/TTATTTTATTTTATTTTATTTTATTTTATTTTATTTT	TTATTTTATTTTATTTTATTTTATTTTATTTT/TTATTTTATTTTATTTTATTTTATTTTATTTTATTTTATTTT	TTATTTTATTTTATTTTATTTTATTTTATTTT/TTATTTTATTTTATTTTATTTTATTTTATTTT	TTATTTTATTTTATTTTATTTTATTTTATTTTATTTT/TTATTTTATTTTATTTTATTTTATTTTATTTTATTTT	TTATTTTATTTTATTTTATTTTATTTTATTTT/TTATTTTATTTTATTTTATTTTATTTTATTTT	TTATTTTATTTTATTTTATTTTATTTTATTTT/TTATTTTATTTTATTTTATTTTATTTTATTTTATTTTATTTT	TTATTTTATTTTATTTTATTTTATTTTATTTT/TTATTTTATTTTATTTTATTTTATTTTATTTT	TTATTTTATTTTATTTTATTTTATTTTATTTTATTTTATTTT/TTATTTTATTTTATTTTATTTTATTTTATTTTATTTTATTTT
Xunr35	2	23282313	ACTTCCTCACACCTGAAACTAGCCATTGCACACTTCTATC	54.273	GGCAGTGGGTTAAGGGAAACAACGGTGGTGCTTGGAGATG	58.718	TCTCTCTCTCTCTCTCTCTCTCTCTCTCTCTCTCTCTCTCT	TCTCTCTCTCTCTCTCTCTCTCTCTCTCTCTCTCTCTCTCT;TCTCTCTCTCT;TCTCTCTCTCTCT;TCTCTCTCTCTCTCT;TCTCTCTCTCTCTCTCT;TCTCTCTCTCTCTCTCTCT;TCTCTCTCTCTCTCTCTCTCT;TCTCTCTCTCTCTCTCTCTCTCT;TCTCTCTCTCTCTCTCTCTCTCTCT;TCTCTCTCTCTCTCTCTCTCTCTCTCT;TCTCTCTCTCTCTCTCTCTCTCTCTCTCT;TCTCTCTCTCTCTCTCTCTCTCTCTCTCTCT;TCTCTCTCTCTCTCTCTCTCTCTCTCTCTCTCT;TCTCTCTCTCTCTCTCTCTCTCTCTCTCTCTCTCT;TCTCTCTCTCTCTCTCTCTCTCTCTCTCTCTCTCTCT;TCTCTCT…	TCTCTCTCTCTCTCTCTCTCTCT/TCTCTCTCTCTCTCTCTCTCTCTCT	TCTCTCTCTCTCTCTCTCTCTCTCTCTCTCTCTCTCTCTCT/TCTCTCTCTCTCTCTCTCTCTCTCTCTCTCTCTCTCTCTCTCT	TCTCTCTCTCTCTCTCTCTCTCTCTCTCTCTCTCTCT/TCTCTCTCTCTCTCTCTCTCTCTCTCTCTCTCTCTCTCT	TCTCTCTCTCTCTCTCTCTCTCTCTCTCTCTCTCTCTCT/TCTCTCTCTCTCTCTCTCTCTCTCTCTCTCTCTCTCTCTCT	TCTCTCTCTCTCTCTCTCTCTCT/TCTCTCTCTCTCTCTCTCTCTCTCTCTCTCTCTCTCT	TCTCTCTCTCTCTCTCTCTCTCTCTCTCTCTCT/TCTCTCTCTCTCTCTCTCTCTCTCTCTCTCTCTCT	TCTCTCTCTCTCTCTCTCTCTCTCTCTCTCTCTCTCTCTCT/TCTCTCTCTCTCTCTCTCTCTCTCTCTCTCTCTCTCTCTCTCT	TCTCTCTCTCTCTCTCTCTCTCTCTCTCTCTCT/TCTCTCTCTCTCTCTCTCTCTCTCTCTCTCTCTCTCT	TCTCTCTCTCTCTCTCTCTCTCTCTCTCTCTCT/TCTCTCTCTCTCTCTCTCTCTCTCTCTCTCTCTCT	TCTCTCTCTCTCTCTCTCTCTCTCTCTCTCTCTCT/TCTCTCTCTCTCTCTCTCTCTCTCTCTCTCTCTCTCTCTCTCTCT	TCTCTCTCTCTCTCTCTCTCTCTCT/TCTCTCTCTCTCTCTCTCTCTCTCT	TCTCTCTCTCTCTCTCTCTCTCTCTCTCTCTCT/TCTCTCTCTCTCTCTCTCTCTCTCTCTCTCTCTCT	TCTCTCTCTCTCTCTCTCTCTCTCTCTCTCTCTCTCTCTCTCT/TCTCTCTCTCTCTCTCTCTCTCTCTCTCTCTCTCTCTCTCTCT	TCTCTCTCTCTCTCTCTCTCTCTCTCT/TCTCTCTCTCTCTCTCTCTCTCTCTCTCTCTCTCTCTCTCT	TCTCTCTCTCTCTCTCTCTCTCTCT/TCTCTCTCTCTCTCTCTCTCTCTCTCT	TCTCTCTCTCTCTCTCTCTCTCTCTCT/TCTCTCTCTCTCTCTCTCTCTCTCTCTCTCTCTCTCTCTCT	./.	TCTCTCTCTCTCTCTCTCTCTCTCTCTCTCTCTCTCTCTCTCT/TCTCTCTCTCTCTCTCTCTCTCTCTCTCTCTCTCTCTCTCTCT	TCTCTCTCTCTCTCTCTCTCTCTCTCTCTCTCTCT/TCTCTCTCTCTCTCTCTCTCTCTCTCTCTCTCTCTCTCT	TCTCTCTCTCTCTCTCTCTCTCTCTCTCTCTCTCTCTCTCTCT/TCTCTCTCTCTCTCTCTCTCTCTCTCTCTCTCTCTCTCTCTCTCT	./.	TCTCTCTCTCTCTCTCTCTCTCTCTCTCTCTCTCT/TCTCTCTCTCTCTCTCTCTCTCTCTCTCTCTCTCTCTCT	TCTCTCTCTCTCTCTCTCTCTCTCTCTCTCTCTCTCTCT/TCTCTCTCTCTCTCTCTCTCTCTCTCTCTCTCTCTCTCTCTCT	TCTCTCTCTCTCTCTCTCTCTCTCTCT/TCTCTCTCTCTCTCTCTCTCTCTCTCTCTCTCTCTCTCTCT	TCTCTCTCTCTCTCTCTCTCTCTCTCTCT/TCTCTCTCTCTCTCTCTCTCTCTCTCTCTCTCTCTCTCTCT	TCTCTCTCTCTCTCTCTCTCTCTCTCTCTCT/TCTCTCTCTCTCTCTCTCTCTCTCTCTCTCTCTCTCTCTCT	TCTCTCTCTCTCTCTCTCTCTCTCTCTCTCT/TCTCTCTCTCTCTCTCTCTCTCTCTCTCTCTCTCT	TCTCTCTCTCTCTCTCTCTCTCTCTCTCTCTCTCT/TCTCTCTCTCTCTCTCTCTCTCTCTCTCTCTCTCTCTCTCTCT	TCTCTCTCTCTCTCTCTCTCTCTCTCTCTCTCTCTCT/TCTCTCTCTCTCTCTCTCTCTCTCTCTCTCTCTCTCTCT	./.	TCTCTCTCTCTCTCTCTCTCTCTCTCTCTCTCTCTCTCTCT/TCTCTCTCTCTCTCTCTCTCTCTCTCTCTCTCTCTCTCTCT	TCTCTCTCTCTCTCTCTCTCTCTCTCTCTCT/TCTCTCTCTCTCTCTCTCTCTCTCTCTCTCTCT	TCTCTCTCTCTCTCTCTCTCTCTCTCTCTCT/TCTCTCTCTCTCTCTCTCTCTCTCTCTCTCTCT	TCTCTCTCTCTCTCTCTCTCTCTCTCTCTCTCTCTCTCT/TCTCTCTCTCTCTCTCTCTCTCTCTCTCTCTCTCTCTCTCT	TCTCTCTCTCTCTCTCTCTCTCT/TCTCTCTCTCTCTCTCTCTCTCTCTCTCTCTCTCTCTCTCTCT	TCTCTCTCTCTCTCTCTCTCTCTCTCT/TCTCTCTCTCTCTCTCTCTCTCTCTCTCTCTCTCTCT	TCTCTCTCTCTCTCTCTCTCT/TCTCTCTCTCTCTCTCTCTCTCT	TCTCTCTCTCTCTCTCTCTCTCTCTCTCTCTCTCT/TCTCTCTCTCTCTCTCTCTCTCTCTCTCTCTCTCTCTCT	TCTCTCTCTCTCTCTCTCTCTCTCTCTCTCT/TCTCTCTCTCTCTCTCTCTCTCTCTCTCTCTCTCTCTCT	TCTCTCTCTCTCT/TCTCTCTCTCTCTCTCTCTCT	TCTCTCTCTCTCTCTCTCTCTCTCTCTCTCTCTCTCTCT/TCTCTCTCTCTCTCTCTCTCTCTCTCTCTCTCTCTCTCTCT
Xunr36	2	56015261	ATTTGTAGACAATGGACATATCCCCCACATATGAAAATGG	50.847	GTTTCTCATGTAGATAGAACCTTTATATTTCCTCAAAAAC	46.781	AGAGAGAGAGAGAGAGA	AGAGAGAGAGAGAGAGA;AGAGAGAGAGAGA;AGAGAGAGAGAGAGA;AGAGAGAGAGAGAGAG;AGAGAGAGAGAGAGAGAGA;AGAGAGAGAGAGAGAGAGAGA;AGAGAGAGAGAGAGAGAGAGAGA;AGAGAGAGAGAGAGAGAGAGAGAGA;AGAGAGAGAGAGAGAGAGAGAGAGAGA;AGAGAGAGAGAGAGAGAGAGAGAGAGAGA;AGAGAGAGAGAGAGAGAGAGAGAGAGAGAGA;AGAGAGAGAGAGAGAGAGAGAGAGAGAGAGAGA;AGAGAGAGAGAGAGAGAGAGAGAGAGAGAGAGAGA;AGAGAGAGAGAGAGAGAGAGAGAGAGAGAGAGAGAGA;AGAGAGAGAGAGAGAGAGAGAGAGAGAGAGAGAGAGAGA	AGAGAGAGAGAGAGAGAGA/AGAGAGAGAGAGAGAGAGAGAGAGAGAGA	AGAGAGAGAGAGAGAGAGAGAGA/AGAGAGAGAGAGAGAGAGAGAGAGAGA	AGAGAGAGAGAGAGA/AGAGAGAGAGAGAGAGA	AGAGAGAGAGAGAGA/AGAGAGAGAGAGAGAGA	AGAGAGAGAGAGAGAGAGAGAGAGA/AGAGAGAGAGAGAGAGAGAGAGAGAGA	AGAGAGAGAGAGAGAGAGAGAGA/AGAGAGAGAGAGAGAGAGAGAGAGAGA	AGAGAGAGAGAGAGAGA/AGAGAGAGAGAGAGAGA	AGAGAGAGAGAGAGAGAGA/AGAGAGAGAGAGAGAGAGAGA	AGAGAGAGAGAGAGA/AGAGAGAGAGAGAGAGAGA	AGAGAGAGAGAGAGAGAGAGA/AGAGAGAGAGAGAGAGAGAGAGA	AGAGAGAGAGAGAGAGA/AGAGAGAGAGAGAGAGAGAGAGAGAGAGAGAGA	AGAGAGAGAGAGAGA/AGAGAGAGAGAGAGAGA	AGAGAGAGAGAGAGAGAGAGA/AGAGAGAGAGAGAGAGAGAGAGA	AGAGAGAGAGAGAGAGAGA/AGAGAGAGAGAGAGAGAGAGAGAGAGA	AGAGAGAGAGAGAGAGAGAGAGA/AGAGAGAGAGAGAGAGAGAGAGAGA	AGAGAGAGAGAGAGA/AGAGAGAGAGAGAGAGA	AGAGAGAGAGAGAGAGAGAGAGAGA/AGAGAGAGAGAGAGAGAGAGAGAGAGAGAGAGAGAGAGA	AGAGAGAGAGAGAGAGAGAGAGAGA/AGAGAGAGAGAGAGAGAGAGAGAGAGA	AGAGAGAGAGAGAGA/AGAGAGAGAGAGAGAGA	AGAGAGAGAGAGAGAGAGAGAGA/AGAGAGAGAGAGAGAGAGAGAGAGA	AGAGAGAGAGAGA/AGAGAGAGAGAGAGAGAGAGAGAGAGA	AGAGAGAGAGAGAGA/AGAGAGAGAGAGAGAGA	AGAGAGAGAGAGAGAGAGAGAGA/AGAGAGAGAGAGAGAGAGAGAGAGAGA	AGAGAGAGAGAGAGAGA/AGAGAGAGAGAGAGAGAGAGAGAGA	AGAGAGAGAGAGAGA/AGAGAGAGAGAGAGAGA	AGAGAGAGAGAGAGA/AGAGAGAGAGAGAGAGA	AGAGAGAGAGAGAGA/AGAGAGAGAGAGAGAGA	AGAGAGAGAGAGAGAGA/AGAGAGAGAGAGAGAGA	AGAGAGAGAGAGAGAGAGAGA/AGAGAGAGAGAGAGAGAGAGAGAGAGAGAGAGAGA	AGAGAGAGAGAGAGAGAGAGAGAGA/AGAGAGAGAGAGAGAGAGAGAGAGAGAGAGA	AGAGAGAGAGAGAGAGA/AGAGAGAGAGAGAGAGAGAGAGAGAGA	AGAGAGAGAGAGAGAGAGAGA/AGAGAGAGAGAGAGAGAGAGAGA	AGAGAGAGAGAGAGA/AGAGAGAGAGAGAGAGA	AGAGAGAGAGAGAGAGA/AGAGAGAGAGAGAGAGA	AGAGAGAGAGAGAGAGAGAGAGA/AGAGAGAGAGAGAGAGAGAGAGAGA	AGAGAGAGAGAGAGA/AGAGAGAGAGAGAGAGA	AGAGAGAGAGAGAGAGAGAGAGAGAGAGAGA/AGAGAGAGAGAGAGAGAGAGAGAGAGAGAGAGA	AGAGAGAGAGAGAGAGA/AGAGAGAGAGAGAGAGAGAGAGAGAGAGA	AGAGAGAGAGAGAGAGA/AGAGAGAGAGAGAGAGA	AGAGAGAGAGAGAGAGAGA/AGAGAGAGAGAGAGAGAGAGA	AGAGAGAGAGAGAGA/AGAGAGAGAGAGAGAGA
Xunr37	2	56191787	GCGAGCGAGCGTCCGTCTCCATGCATATGGCTGCACCAAG	62.472	CGTCGGCGACGGCCGCCGTCGTCGTCCCTGACGCCACGAG	68.699	CTGTTGCTGCTGCTGCTGCT	CTGTTGCTGCT;CTGTTGCTGCTGCTGCTGCTGCT;CTGTTGCTGCTGCTGCTGCTGCTGCT	CTGTTGCTGCTGCTGCTGCT/CTGTTGCTGCTGCTGCTGCT	CTGTTGCTGCTGCTGCTGCT/CTGTTGCTGCTGCTGCTGCT	CTGTTGCTGCT/CTGTTGCTGCT	CTGTTGCTGCTGCTGCTGCT/CTGTTGCTGCTGCTGCTGCT	./.	CTGTTGCTGCTGCTGCTGCT/CTGTTGCTGCTGCTGCTGCT	CTGTTGCTGCTGCTGCTGCT/CTGTTGCTGCTGCTGCTGCT	./.	CTGTTGCTGCTGCTGCTGCT/CTGTTGCTGCTGCTGCTGCT	CTGTTGCTGCTGCTGCTGCT/CTGTTGCTGCTGCTGCTGCTGCTGCT	CTGTTGCTGCTGCTGCTGCT/CTGTTGCTGCTGCTGCTGCT	CTGTTGCTGCT/CTGTTGCTGCT	CTGTTGCTGCTGCTGCTGCT/CTGTTGCTGCTGCTGCTGCT	CTGTTGCTGCTGCTGCTGCT/CTGTTGCTGCTGCTGCTGCT	CTGTTGCTGCTGCTGCTGCT/CTGTTGCTGCTGCTGCTGCT	CTGTTGCTGCTGCTGCTGCT/CTGTTGCTGCTGCTGCTGCT	CTGTTGCTGCTGCTGCTGCT/CTGTTGCTGCTGCTGCTGCT	CTGTTGCTGCTGCTGCTGCT/CTGTTGCTGCTGCTGCTGCT	CTGTTGCTGCTGCTGCTGCT/CTGTTGCTGCTGCTGCTGCT	CTGTTGCTGCTGCTGCTGCT/CTGTTGCTGCTGCTGCTGCT	CTGTTGCTGCT/CTGTTGCTGCTGCTGCTGCT	CTGTTGCTGCTGCTGCTGCT/CTGTTGCTGCTGCTGCTGCT	CTGTTGCTGCT/CTGTTGCTGCTGCTGCTGCTGCT	CTGTTGCTGCTGCTGCTGCT/CTGTTGCTGCTGCTGCTGCT	CTGTTGCTGCTGCTGCTGCT/CTGTTGCTGCTGCTGCTGCT	CTGTTGCTGCT/CTGTTGCTGCT	CTGTTGCTGCT/CTGTTGCTGCT	CTGTTGCTGCTGCTGCTGCT/CTGTTGCTGCTGCTGCTGCT	CTGTTGCTGCTGCTGCTGCT/CTGTTGCTGCTGCTGCTGCT	CTGTTGCTGCT/CTGTTGCTGCT	CTGTTGCTGCTGCTGCTGCT/CTGTTGCTGCTGCTGCTGCT	CTGTTGCTGCTGCTGCTGCTGCT/CTGTTGCTGCTGCTGCTGCTGCT	CTGTTGCTGCTGCTGCTGCT/CTGTTGCTGCTGCTGCTGCT	CTGTTGCTGCTGCTGCTGCT/CTGTTGCTGCTGCTGCTGCT	CTGTTGCTGCT/CTGTTGCTGCT	CTGTTGCTGCT/CTGTTGCTGCT	CTGTTGCTGCTGCTGCTGCT/CTGTTGCTGCTGCTGCTGCT	CTGTTGCTGCTGCTGCTGCT/CTGTTGCTGCTGCTGCTGCT	CTGTTGCTGCTGCTGCTGCT/CTGTTGCTGCTGCTGCTGCT	CTGTTGCTGCTGCTGCTGCTGCT/CTGTTGCTGCTGCTGCTGCTGCT	CTGTTGCTGCTGCTGCTGCT/CTGTTGCTGCTGCTGCTGCT
Xunr38	2	56247582	TCATTTGTTCGCCATAGCCGAGAGTATAGAGTATTGAAAG	51.831	AATAAAATGATATTTCTTGCCCCGCACCGCAATCCTTTTC	53.688	TATTTATTTATTTATTTAT	TATTTATTTAT;TATTTATTTATTT;TATTTATTTATTTA;TATTTATTTATTTATTTATTTA;TATTTATTTATTTATTTATTTAT;TATTTATTTATTTATTTATTTATTTAT;TATTTATTTATTTATTTATTTATTTATTTAT	TATTTATTTAT/TATTTATTTAT	TATTTATTTATTTATTTAT/TATTTATTTATTTATTTAT	TATTTATTTATTTATTTAT/TATTTATTTATTTATTTAT	TATTTATTTATTTATTTAT/TATTTATTTATTTATTTAT	TATTTATTTATTTATTTATTTATTTAT/TATTTATTTATTTATTTATTTATTTAT	TATTTATTTATTTATTTAT/TATTTATTTATTTATTTAT	TATTTATTTATTTATTTAT/TATTTATTTATTTATTTATTTATTTAT	TATTTATTTATTTATTTAT/TATTTATTTATTTATTTAT	TATTTATTTATTTATTTAT/TATTTATTTATTTATTTAT	./.	TATTTATTTATTTATTTAT/TATTTATTTATTTATTTAT	TATTTATTTATTTATTTAT/TATTTATTTATTTATTTAT	TATTTATTTATTTATTTATTTA/TATTTATTTATTTATTTATTTA	TATTTATTTATTTATTTAT/TATTTATTTATTTATTTATTTATTTAT	TATTTATTTATTTATTTAT/TATTTATTTATTTATTTATTTATTTAT	./.	TATTTATTTATTTATTTAT/TATTTATTTATTTATTTATTTATTTAT	TATTTATTTATTTATTTAT/TATTTATTTATTTATTTAT	TATTTATTTATTTATTTAT/TATTTATTTATTTATTTAT	TATTTATTTATTTATTTAT/TATTTATTTATTTATTTAT	TATTTATTTATTTATTTAT/TATTTATTTATTTATTTATTTATTTAT	TATTTATTTATTTATTTAT/TATTTATTTATTTATTTAT	TATTTATTTATTTATTTATTTAT/TATTTATTTATTTATTTATTTATTTAT	TATTTATTTATTTATTTATTTATTTAT/TATTTATTTATTTATTTATTTATTTAT	TATTTATTTATTTATTTAT/TATTTATTTATTTATTTAT	TATTTATTTATTTATTTAT/TATTTATTTATTTATTTAT	TATTTATTTATTTATTTAT/TATTTATTTATTTATTTAT	TATTTATTTATTTATTTAT/TATTTATTTATTTATTTATTTATTTAT	TATTTATTTATTTATTTAT/TATTTATTTATTTATTTAT	TATTTATTTATTTATTTAT/TATTTATTTATTTATTTAT	TATTTATTTATTTATTTAT/TATTTATTTATTTATTTAT	./.	TATTTATTTATTTATTTAT/TATTTATTTATTTATTTAT	TATTTATTTATTTATTTAT/TATTTATTTATTTATTTAT	TATTTATTTAT/TATTTATTTAT	TATTTATTTATTTATTTAT/TATTTATTTATTTATTTAT	TATTTATTTAT/TATTTATTTAT	TATTTATTTATTTATTTAT/TATTTATTTATTTATTTAT	TATTTATTTATTTATTTAT/TATTTATTTATTTATTTAT	TATTTATTTATTTATTTAT/TATTTATTTATTTATTTATTTATTTATTTAT	TATTTATTTATTTATTTAT/TATTTATTTATTTATTTAT
Xunr39	2	57836825	ATTTTCCACTTTACATTTTGTTTCTTTAATTTACTATGAC	45.301	AGTTGGAGGGAGATGGACAAAAAAATTCTGAAATTTAGCC	51.642	TATATATATATATATATATATAT	TATATATATATAT;TATATATATATATAT;TATATATATATATATAT	./.	./.	./.	./.	./.	./.	./.	./.	./.	./.	./.	TATATATATATATAT/TATATATATATATAT	./.	./.	./.	./.	./.	./.	./.	./.	./.	./.	./.	./.	./.	./.	./.	./.	./.	TATATATATATATAT/TATATATATATATAT	./.	./.	./.	./.	./.	./.	./.	./.	./.	./.	./.
Xunr40	2	60825060	GAGAAAATCACCCCTCAATCCCTCAAACATAGGGAACAAG	53.359	TGGTGGCCAAGGTTCGATGGGGGCATGACATAGTGGGTTC	60.093	CTCTCTCTCTCTCTCTCTCTCTCTCTCTCTC	CTCTCTCTCTCTCTCTCTCTCTCTCTCTCTC;CTCTCTCTCTC;CTCTCTCTCTCTC;CTCTCTCTCTCTCTC;CTCTCTCTCTCTCTCTC;CTCTCTCTCTCTCTCTCTC;CTCTCTCTCTCTCTCTCTCTC;CTCTCTCTCTCTCTCTCTCTCTC;CTCTCTCTCTCTCTCTCTCTCTCT;CTCTCTCTCTCTCTCTCTCTCTCTC;CTCTCTCTCTCTCTCTCTCTCTCTCTC;CTCTCTCTCTCTCTCTCTCTCTCTCTCTC;CTCTCTCTCTCTCTCTCTCTCTCTCTCTCTCTC;CTCTCTCTCTCTCTCTCTCTCTCTCTCTCTCTCTCTCTCTCTCTCTC	CTCTCTCTCTCTCTCTC/CTCTCTCTCTCTCTCTC	CTCTCTCTCTCTCTCTC/CTCTCTCTCTCTCTCTC	CTCTCTCTCTCTCTCTC/CTCTCTCTCTCTCTCTCTCTCTCTCTC	CTCTCTCTCTCTCTC/CTCTCTCTCTCTCTC	CTCTCTCTCTCTCTCTCTCTCTCTC/CTCTCTCTCTCTCTCTCTCTCTCTCTC	CTCTCTCTCTCTCTCTCTCTC/CTCTCTCTCTCTCTCTCTCTCTCTCTCTCTC	CTCTCTCTCTCTCTC/CTCTCTCTCTCTCTC	CTCTCTCTCTCTCTC/CTCTCTCTCTCTCTC	CTCTCTCTCTCTCTC/CTCTCTCTCTCTCTCTC	CTCTCTCTCTCTCTCTCTCTCTCTCTCTC/CTCTCTCTCTCTCTCTCTCTCTCTCTCTCTC	CTCTCTCTCTCTCTCTCTCTCTCTCTC/CTCTCTCTCTCTCTCTCTCTCTCTCTCTCTC	CTCTCTCTCTCTCTCTCTCTC/CTCTCTCTCTCTCTCTCTCTCTCTCTCTCTCTC	CTCTCTCTCTCTC/CTCTCTCTCTCTC	CTCTCTCTCTCTCTCTCTC/CTCTCTCTCTCTCTCTCTCTCTCTCTCTC	CTCTCTCTCTCTCTC/CTCTCTCTCTCTCTCTCTCTCTCTCTCTCTC	CTCTCTCTCTCTCTC/CTCTCTCTCTCTCTCTC	CTCTCTCTCTCTCTC/CTCTCTCTCTCTCTC	CTCTCTCTCTCTCTCTC/CTCTCTCTCTCTCTCTC	CTCTCTCTCTCTCTCTCTCTCTCTCTC/CTCTCTCTCTCTCTCTCTCTCTCTCTCTC	CTCTCTCTCTCTCTC/CTCTCTCTCTCTCTCTC	CTCTCTCTCTCTCTC/CTCTCTCTCTCTCTCTC	CTCTCTCTCTCTC/CTCTCTCTCTCTCTC	CTCTCTCTCTCTCTC/CTCTCTCTCTCTCTC	CTCTCTCTCTCTCTC/CTCTCTCTCTCTCTCTCTCTCTCTCTC	CTCTCTCTCTCTCTCTC/CTCTCTCTCTCTCTCTCTCTCTCTCTCTCTC	CTCTCTCTCTCTCTC/CTCTCTCTCTCTCTCTC	CTCTCTCTCTCTCTCTCTCTCTCTCTCTC/CTCTCTCTCTCTCTCTCTCTCTCTCTCTCTC	CTCTCTCTCTCTCTCTCTCTCTCTC/CTCTCTCTCTCTCTCTCTCTCTCTCTC	CTCTCTCTCTCTCTCTC/CTCTCTCTCTCTCTCTC	CTCTCTCTCTCTCTC/CTCTCTCTCTCTCTCTC	CTCTCTCTCTCTCTCTC/CTCTCTCTCTCTCTCTCTCTCTCTCTCTCTCTC	CTCTCTCTCTCTC/CTCTCTCTCTCTCTC	CTCTCTCTCTCTCTCTCTCTCTCTCTC/CTCTCTCTCTCTCTCTCTCTCTCTCTCTC	CTCTCTCTCTCTCTCTCTC/CTCTCTCTCTCTCTCTCTCTCTCTCTC	CTCTCTCTCTCTCTCTCTC/CTCTCTCTCTCTCTCTCTCTCTCTCTCTC	CTCTCTCTCTCTCTCTC/CTCTCTCTCTCTCTCTCTCTCTCTCTC	CTCTCTCTCTCTCTC/CTCTCTCTCTCTCTCTC	CTCTCTCTCTCTCTC/CTCTCTCTCTCTCTCTC	CTCTCTCTCTCTC/CTCTCTCTCTCTCTC	CTCTCTCTCTCTCTC/CTCTCTCTCTCTCTCTC	CTCTCTCTCTCTCTC/CTCTCTCTCTCTCTC
Xunr41	2	61348512	TTGTGATCATTTTATGCCTTAATTTTAAATACTTTGAAGC	46.76	TCTTCATCTGCCAATGATGACAATTTGATTAAATCAAGAG	49.448	GAGAGAGAGAGAGAGAGAGAGAGAGAGAGAGAGAGAGAGAGAG	GAGAGAGAGAGAGAGAGAGAGAGAGAGAGAGAGAGAGAGAGAG;GAGAGAGAGAG;GAGAGAGAGAGAG;GAGAGAGAGAGAGAG;GAGAGAGAGAGAGAGAG;GAGAGAGAGAGAGAGAGAG;GAGAGAGAGAGAGAGAGAGAG;GAGAGAGAGAGAGAGAGAGAGAG;GAGAGAGAGAGAGAGAGAGAGAGAG;GAGAGAGAGAGAGAGAGAGAGAGAGAG;GAGAGAGAGAGAGAGAGAGAGAGAGAGAG;GAGAGAGAGAGAGAGAGAGAGAGAGAGAGAG;GAGAGAGAGAGAGAGAGAGAGAGAGAGAGAGAG;GAGAGAGAGAGAGAGAGAGAGAGAGAGAGAGAGAG;GAGAGAGAGAGAGAGAGAGAGAGAGAGAGAGAGAGAG;GAGAG…	GAGAGAGAGAGAGAGAGAGAGAG/GAGAGAGAGAGAGAGAGAGAGAGAG	GAGAGAGAGAGAGAGAGAGAGAGAGAGAGAGAG/GAGAGAGAGAGAGAGAGAGAGAGAGAGAGAGAGAGAG	GAGAGAGAGAGAGAGAGAGAGAGAGAGAG/GAGAGAGAGAGAGAGAGAGAGAGAGAGAGAG	GAGAGAGAGAGAGAGAGAGAGAGAGAGAGAG/GAGAGAGAGAGAGAGAGAGAGAGAGAGAGAGAGAG	GAGAGAGAGAGAGAGAGAGAGAGAGAGAGAGAG/GAGAGAGAGAGAGAGAGAGAGAGAGAGAGAGAGAGAG	GAGAGAGAGAGAG/GAGAGAGAGAGAGAGAGAGAGAGAGAGAGAGAGAG	GAGAGAGAGAGAGAGAGAGAG/GAGAGAGAGAGAGAGAGAGAGAG	GAGAGAGAGAGAGAGAGAGAGAGAGAGAGAGAGAGAG/GAGAGAGAGAGAGAGAGAGAGAGAGAGAGAGAGAGAG	GAGAGAGAGAGAGAGAGAGAGAGAG/GAGAGAGAGAGAGAGAGAGAGAGAGAGAGAGAGAGAGAGAG	GAGAGAGAGAGAGAGAGAGAGAGAGAGAGAGAGAGAG/GAGAGAGAGAGAGAGAGAGAGAGAGAGAGAGAGAGAGAG	GAGAGAGAGAGAGAGAGAGAGAGAGAGAGAGAGAG/GAGAGAGAGAGAGAGAGAGAGAGAGAGAGAGAGAGAGAGAG	GAGAGAGAGAGAGAGAGAGAGAGAGAGAG/GAGAGAGAGAGAGAGAGAGAGAGAGAGAGAGAG	GAGAGAGAGAGAGAGAGAGAGAGAGAGAGAG/GAGAGAGAGAGAGAGAGAGAGAGAGAGAGAGAGAG	GAGAGAGAGAGAGAGAGAGAGAGAGAGAGAGAG/GAGAGAGAGAGAGAGAGAGAGAGAGAGAGAGAGAG	GAGAGAGAGAGAGAGAGAGAGAGAG/GAGAGAGAGAGAGAGAGAGAGAGAGAG	GAGAGAGAGAGAGAGAGAGAGAG/GAGAGAGAGAGAGAGAGAGAGAGAGAG	GAGAGAGAGAGAGAGAGAGAGAG/GAGAGAGAGAGAGAGAGAGAGAGAGAG	GAGAGAGAGAGAGAGAGAGAGAGAGAGAGAGAGAG/GAGAGAGAGAGAGAGAGAGAGAGAGAGAGAGAGAGAG	GAGAGAGAGAGAGAGAGAGAGAGAG/GAGAGAGAGAGAGAGAGAGAGAGAGAG	GAGAGAGAGAG/GAGAGAGAGAGAGAGAGAGAGAGAGAGAGAGAG	GAGAGAGAGAGAGAGAGAGAGAGAGAG/GAGAGAGAGAGAGAGAGAGAGAGAGAGAG	GAGAGAGAGAGAGAGAGAGAG/GAGAGAGAGAGAGAGAGAGAGAG	GAGAGAGAGAGAGAGAGAGAG/GAGAGAGAGAGAGAGAGAGAGAG	GAGAGAGAGAGAGAGAGAGAGAGAGAG/GAGAGAGAGAGAGAGAGAGAGAGAGAGAGAGAGAGAG	GAGAGAGAGAGAGAGAGAG/GAGAGAGAGAGAGAGAGAGAGAGAGAGAGAGAGAGAGAGAG	GAGAGAGAGAGAGAGAGAGAGAGAGAGAGAGAGAG/GAGAGAGAGAGAGAGAGAGAGAGAGAGAGAGAGAGAGAGAGAG	GAGAGAGAGAGAGAGAGAGAGAGAGAGAGAGAG/GAGAGAGAGAGAGAGAGAGAGAGAGAGAGAGAGAG	GAGAGAGAGAGAGAGAGAGAGAGAGAGAG/GAGAGAGAGAGAGAGAGAGAGAGAGAGAGAG	GAGAGAGAGAGAGAGAGAGAGAG/GAGAGAGAGAGAGAGAGAGAGAGAGAGAGAGAGAGAGAGAG	GAGAGAGAGAGAGAGAGAGAGAGAG/GAGAGAGAGAGAGAGAGAGAGAGAGAGAGAGAGAGAG	GAGAGAGAGAGAGAGAGAGAGAGAGAGAGAGAG/GAGAGAGAGAGAGAGAGAGAGAGAGAGAGAGAGAG	GAGAGAGAGAGAGAGAGAGAGAGAGAGAGAG/GAGAGAGAGAGAGAGAGAGAGAGAGAGAGAGAG	GAGAGAGAGAGAGAGAGAGAGAGAGAGAGAGAGAGAGAG/GAGAGAGAGAGAGAGAGAGAGAGAGAGAGAGAGAGAGAGAG	GAGAGAGAGAGAGAGAGAGAGAGAGAG/GAGAGAGAGAGAGAGAGAGAGAGAGAGAGAGAGAGAGAGAGAG	GAGAGAGAGAGAGAGAGAG/GAGAGAGAGAGAGAGAGAGAGAGAGAGAGAGAGAG	GAGAGAGAGAGAGAGAGAGAGAGAGAGAG/GAGAGAGAGAGAGAGAGAGAGAGAGAGAGAG	GAGAGAGAGAGAGAGAGAGAGAGAGAGAGAGAG/GAGAGAGAGAGAGAGAGAGAGAGAGAGAGAGAG	GAGAGAGAGAGAGAGAGAGAGAGAGAGAGAGAGAGAGAG/GAGAGAGAGAGAGAGAGAGAGAGAGAGAGAGAGAGAGAGAGAG	GAGAGAGAGAGAGAGAGAGAG/GAGAGAGAGAGAGAGAGAGAGAG	GAGAGAGAGAGAGAGAGAGAGAGAGAGAGAG/GAGAGAGAGAGAGAGAGAGAGAGAGAGAGAGAGAGAG	GAGAGAGAGAGAGAGAGAG/GAGAGAGAGAGAGAGAGAGAG
Xunr42	2	63105527	TCGAGGTTTCCCGGCTGAGGGCATTTCCATTTCTGCAGTC	59.371	CTGCCTCTTCTATGTGGTCGGTAAGCAATGGAGGTCATAG	55.193	TCTCTCTCTCTCTCTCTCTCTCTCTCTCTCTCTCTCTCTCTC	TCTCTCTCTCTCTC;TCTCTCTCTCTCTCTC;TCTCTCTCTCTCTCTCTC;TCTCTCTCTCTCTCTCTCTC;TCTCTCTCTCTCTCTCTCTCTC;TCTCTCTCTCTCTCTCTCTCTCT;TCTCTCTCTCTCTCTCTCTCTCTC;TCTCTCTCTCTCTCTCTCTCTCTCTC;TCTCTCTCTCTCTCTCTCTCTCTCTCTC;TCTCTCTCTCTCTCTCTCTCTCTCTCTCTC;TCTCTCTCTCTCTCTCTCTCTCTCTCTCTCTC;TCTCTCTCTCTCTCTCTCTCTCTCTCTCTCTCTC;TCTCTCTCTCTCTCTCTCTCTCTCTCTCTCTCTCTC;TCTCTCTCTCTCTCTCTCTCTCTCTCTCTCTCTCTCTC;TCTCTCTCTCTCTCTCTCTCTCTC…	TCTCTCTCTCTCTCTCTCTCTCTCTCTCTC/TCTCTCTCTCTCTCTCTCTCTCTCTCTCTCTC	TCTCTCTCTCTCTCTCTCTCTCTCTCTCTCTCTC/TCTCTCTCTCTCTCTCTCTCTCTCTCTCTCTCTCTCTC	TCTCTCTCTCTCTCTCTCTCTCTCTCTCTC/TCTCTCTCTCTCTCTCTCTCTCTCTCTCTCTC	TCTCTCTCTCTCTCTCTC/TCTCTCTCTCTCTCTCTCTC	TCTCTCTCTCTCTCTCTCTCTCTCTCTCTCTC/TCTCTCTCTCTCTCTCTCTCTCTCTCTCTCTCTC	TCTCTCTCTCTCTCTCTCTCTCTCTCTCTC/TCTCTCTCTCTCTCTCTCTCTCTCTCTCTCTCTCTCTCTCTCTC	TCTCTCTCTCTCTCTCTCTCTCTCTCTCTCTCTCTCTC/TCTCTCTCTCTCTCTCTCTCTCTCTCTCTCTCTCTCTCTCTC	TCTCTCTCTCTCTCTCTCTCTCTCTCTCTCTCTC/TCTCTCTCTCTCTCTCTCTCTCTCTCTCTCTCTCTC	TCTCTCTCTCTCTCTCTCTCTCTCTCTCTCTC/TCTCTCTCTCTCTCTCTCTCTCTCTCTCTCTCTC	TCTCTCTCTCTCTCTCTCTC/TCTCTCTCTCTCTCTCTCTCTCTCTCTCTCTCTC	TCTCTCTCTCTCTCTCTCTCTCTCTCTCTCTCTCTCTCTC/TCTCTCTCTCTCTCTCTCTCTCTCTCTCTCTCTCTCTCTCTC	TCTCTCTCTCTCTCTCTCTCTCTCTCTCTC/TCTCTCTCTCTCTCTCTCTCTCTCTCTCTCTCTC	TCTCTCTCTCTCTCTCTCTCTCTCTCTCTC/TCTCTCTCTCTCTCTCTCTCTCTCTCTCTCTC	TCTCTCTCTCTCTC/TCTCTCTCTCTCTCTCTCTCTCTCTC	TCTCTCTCTCTCTCTCTCTCTCTCTCTC/TCTCTCTCTCTCTCTCTCTCTCTCTCTCTCTC	TCTCTCTCTCTCTCTCTCTCTCTCTCTCTCTC/TCTCTCTCTCTCTCTCTCTCTCTCTCTCTCTCTC	TCTCTCTCTCTCTCTCTCTCTCTCTCTCTCTCTCTC/TCTCTCTCTCTCTCTCTCTCTCTCTCTCTCTCTCTCTCTC	TCTCTCTCTCTCTCTCTCTCTCTCTCTCTCTCTC/TCTCTCTCTCTCTCTCTCTCTCTCTCTCTCTCTCTC	TCTCTCTCTCTCTCTCTCTCTCTCTC/TCTCTCTCTCTCTCTCTCTCTCTCTCTCTCTC	./.	TCTCTCTCTCTCTCTCTCTCTCTCTCTCTC/TCTCTCTCTCTCTCTCTCTCTCTCTCTCTCTCTC	./.	TCTCTCTCTCTCTCTCTCTCTCTCTCTCTCTCTCTCTCTCTCTCTC/TCTCTCTCTCTCTCTCTCTCTCTCTCTCTCTCTCTCTCTCTCTCTCTC	TCTCTCTCTCTCTCTCTCTCTCTCTCTCTCTCTCTCTC/TCTCTCTCTCTCTCTCTCTCTCTCTCTCTCTCTCTCTCTCTC	TCTCTCTCTCTCTCTCTCTC/TCTCTCTCTCTCTCTCTCTCTCTCTCTCTCTCTCTCTCTCTC	TCTCTCTCTCTCTCTCTCTCTCTC/TCTCTCTCTCTCTCTCTCTCTCTCTCTCTCTCTCTCTCTC	TCTCTCTCTCTCTCTCTCTCTCTCTCTCTC/TCTCTCTCTCTCTCTCTCTCTCTCTCTCTCTC	TCTCTCTCTCTCTCTCTCTCTCTCTCTCTCTCTC/TCTCTCTCTCTCTCTCTCTCTCTCTCTCTCTCTCTCTCTCTCTC	TCTCTCTCTCTCTCTCTCTCTCTCTCTC/TCTCTCTCTCTCTCTCTCTCTCTCTCTCTCTCTC	TCTCTCTCTCTCTCTCTCTCTCTCTC/TCTCTCTCTCTCTCTCTCTCTCTCTCTCTCTC	TCTCTCTCTCTCTCTCTCTCTCTCTCTCTCTCTCTCTCTCTCTC/TCTCTCTCTCTCTCTCTCTCTCTCTCTCTCTCTCTCTCTCTCTC	TCTCTCTCTCTCTCTCTCTCTCTCTCTCTCTCTC/TCTCTCTCTCTCTCTCTCTCTCTCTCTCTCTCTCTC	TCTCTCTCTCTCTCTCTCTCTCTCTCTCTC/TCTCTCTCTCTCTCTCTCTCTCTCTCTCTCTC	TCTCTCTCTCTCTCTCTCTCTCTCTCTCTCTCTCTCTC/TCTCTCTCTCTCTCTCTCTCTCTCTCTCTCTCTCTCTCTCTC	./.	TCTCTCTCTCTCTCTCTCTCTCTCTCTCTCTC/TCTCTCTCTCTCTCTCTCTCTCTCTCTCTCTCTC	TCTCTCTCTCTCTCTCTCTCTC/TCTCTCTCTCTCTCTCTCTCTCTC	TCTCTCTCTCTCTCTCTCTCTCTCTCTCTCTC/TCTCTCTCTCTCTCTCTCTCTCTCTCTCTCTCTC	TCTCTCTCTCTCTCTCTCTCTCTCTCTCTCTCTC/TCTCTCTCTCTCTCTCTCTCTCTCTCTCTCTCTCTC	TCTCTCTCTCTCTCTCTCTCTCTCTCTCTC/TCTCTCTCTCTCTCTCTCTCTCTCTCTCTCTC	TCTCTCTCTCTCTCTCTCTCTCTCTCTCTCTCTCTCTCTC/TCTCTCTCTCTCTCTCTCTCTCTCTCTCTCTCTCTCTCTCTC
Xunr43	2	64528234	TGCTTGACCTTATAATAAAATTTGATCAGGATGTACTGTG	48.822	TAGATCTTTCTATTAAATTATCACTGACTGAAGGAATATC	45.228	TATTATATATATATATATATATATATATATAT	TATTATATATAT;TATTATATATATAT;TATTATATATATATAT	./.	./.	./.	./.	./.	./.	./.	./.	./.	./.	./.	./.	./.	./.	./.	./.	./.	./.	./.	./.	./.	./.	./.	./.	./.	./.	./.	./.	./.	./.	./.	./.	./.	./.	./.	./.	./.	./.	./.	./.	./.
Xunr44	2	66520128	CTAAACCAATACATGTTCTTCTATAGTTGAGGCCCATCAC	50.969	CTATTGTAGAGATATTTCATATTTGACATATAGGCATGTG	46.239	CACACACACACACACACACACACAC	CACACACACAC;CACACACACACACAC;CACACACACACACACAC;CACACACACACACACACAC;CACACACACACACACACACAC;CACACACACACACACACACACAC;CACACACACACACACACACACACACAC;CACACACACACACACACACACACACACAC;CACACACACACACACACACACACACACACACAC;CACACACACACACACACACACACACACACACACAC;CACACACACACACACACACACACACACACACACACACAC	CACACACACACACACACAC/CACACACACACACACACAC	CACACACACACACACACACACAC/CACACACACACACACACACACACAC	./.	./.	./.	CACACACACACACACACACACAC/CACACACACACACACACACACACAC	./.	CACACACACACACACACACACACACACACACAC/CACACACACACACACACACACACACACACACAC	CACACACACACACACACACACAC/CACACACACACACACACACACACAC	CACACACACACACACACACACAC/CACACACACACACACACACACACAC	./.	CACACACACACACACACACACAC/CACACACACACACACACACACACAC	CACACACACACACACACACACACACACACACAC/CACACACACACACACACACACACACACACACAC	CACACACACACACACACACACACAC/CACACACACACACACACACACACAC	CACACACACACACACACACACAC/CACACACACACACACACACACACAC	CACACACACACACACACACACAC/CACACACACACACACACACACACAC	./.	CACACACACACACACACACACAC/CACACACACACACACACACACACAC	CACACACACACACAC/CACACACACACACACACACACACACAC	CACACACACACACACACACACAC/CACACACACACACACACACACACAC	CACACACACACACACACAC/CACACACACACACACACACACAC	./.	CACACACACACACACACACACACACACAC/CACACACACACACACACACACACACACAC	CACACACACACACACACACACAC/CACACACACACACACACACACACAC	CACACACACACACACACACACAC/CACACACACACACACACACACACAC	CACACACACACACACACACAC/CACACACACACACACACACACACAC	CACACACACACACACACACACACAC/CACACACACACACACACACACACAC	CACACACACACACACACACACAC/CACACACACACACACACACACAC	CACACACACACACACACACACACACACACACAC/CACACACACACACACACACACACACACACACACAC	CACACACACACACACACACACACAC/CACACACACACACACACACACACACAC	CACACACACACACACACACACAC/CACACACACACACACACACACACAC	CACACACACACACACACACACACACACAC/CACACACACACACACACACACACACACAC	CACACACACACACACACACACAC/CACACACACACACACACACACACAC	CACACACACACACACACACACAC/CACACACACACACACACACACACAC	CACACACACACACACACACACAC/CACACACACACACACACACACACACACACACACACACAC	./.	CACACACACACACACACACAC/CACACACACACACACACACACAC	CACACACACACACACACACACAC/CACACACACACACACACACACACAC	CACACACACACACACACAC/CACACACACACACACACACACAC	CACACACACACACACACACAC/CACACACACACACACACACACAC	./.
Xunr45	2	67396640	TCTGACAGCTGAGACACTAGCACCAACCAACAGGGGCAAC	58.955	AGGATCCGGAGGTGGTCGCCGTCGAGGATCCGGAGGAAGG	63.335	AGAGAGAGAGAGAGAG	AGAGAGAGAGAGAGAG;AGAGAGAGAG;AGAGAGAGAGAG;AGAGAGAGAGAGAG;AGAGAGAGAGAGAGA;AGAGAGAGAGAGAGAGAG;AGAGAGAGAGAGAGAGAGAG;AGAGAGAGAGAGAGAGAGAGAG;AGAGAGAGAGAGAGAGAGAGAGAG;AGAGAGAGAGAGAGAGAGAGAGAGAG;AGAGAGAGAGAGAGAGAGAGAGAGAGAG;AGAGAGAGAGAGAGAGAGAGAGAGAGAGAG;AGAGAGAGAGAGAGAGAGAGAGAGAGAGAGAG;AGAGAGAGAGAGAGAGAGAGAGAGAGAGAGAGAG;AGAGAGAGAGAGAGAGAGAGAGAGAGAGAGAGAGAG;AGAGAGAGAGAGAGAGAGAGAGAGAGAGAGAGAGAGAG	AGAGAGAGAGAG/AGAGAGAGAGAG	AGAGAGAGAG/AGAGAGAGAG	AGAGAGAGAGAG/AGAGAGAGAGAGAG	AGAGAGAGAGAGAGAGAG/AGAGAGAGAGAGAGAGAGAGAGAGAGAGAG	AGAGAGAGAGAGAG/AGAGAGAGAGAGAGAG	AGAGAGAGAGAGAG/AGAGAGAGAGAGAGAG	AGAGAGAGAGAGAG/AGAGAGAGAGAGAGAG	AGAGAGAGAGAGAGAG/AGAGAGAGAGAGAGAG	AGAGAGAGAGAGAGAG/AGAGAGAGAGAGAGAG	AGAGAGAGAGAGAGAGAGAGAG/AGAGAGAGAGAGAGAGAGAGAGAGAGAG	AGAGAGAGAGAGAG/AGAGAGAGAGAGAG	AGAGAGAGAGAGAG/AGAGAGAGAGAGAGAG	AGAGAGAGAG/AGAGAGAGAG	AGAGAGAGAGAGAGAGAG/AGAGAGAGAGAGAGAGAGAGAGAGAGAGAGAG	AGAGAGAGAG/AGAGAGAGAGAGAGAG	AGAGAGAGAGAGAG/AGAGAGAGAGAGAGAGAG	AGAGAGAGAGAGAG/AGAGAGAGAGAGAGAG	AGAGAGAGAG/AGAGAGAGAG	AGAGAGAGAGAGAG/AGAGAGAGAGAGAGAG	AGAGAGAGAG/AGAGAGAGAG	AGAGAGAGAGAG/AGAGAGAGAGAG	AGAGAGAGAGAGAG/AGAGAGAGAGAGAGAG	AGAGAGAGAGAGAG/AGAGAGAGAGAGAGAG	AGAGAGAGAGAGAGAG/AGAGAGAGAGAGAGAGAG	AGAGAGAGAGAGAG/AGAGAGAGAGAGAGAG	AGAGAGAGAGAGAG/AGAGAGAGAGAGAG	AGAGAGAGAG/AGAGAGAGAG	AGAGAGAGAGAGAG/AGAGAGAGAGAGAG	AGAGAGAGAG/AGAGAGAGAG	AGAGAGAGAGAGAGAGAGAGAGAGAGAGAG/AGAGAGAGAGAGAGAGAGAGAGAGAGAGAGAGAGAG	AGAGAGAGAGAGAGAG/AGAGAGAGAGAGAGAGAG	AGAGAGAGAG/AGAGAGAGAG	AGAGAGAGAGAGAGAGAGAGAGAGAGAGAGAGAG/AGAGAGAGAGAGAGAGAGAGAGAGAGAGAGAGAGAG	AGAGAGAGAGAGAG/AGAGAGAGAGAGAGAG	AGAGAGAGAGAGAG/AGAGAGAGAGAGAGAGAGAGAGAG	AGAGAGAGAGAGAG/AGAGAGAGAGAGAG	AGAGAGAGAG/AGAGAGAGAGAG	AGAGAGAGAGAGAGAG/AGAGAGAGAGAGAGAG	AGAGAGAGAGAGAG/AGAGAGAGAGAGAG	AGAGAGAGAGAG/AGAGAGAGAGAG	AGAGAGAGAGAGAG/AGAGAGAGAGAGAGAG
Xunr46	2	67797708	AGCGCGCGGATCAGGTCGACGGCGGCGGAGCGGGGGAACC	69.602	CCTCCTCCTGGCAGCCGCAACCGCCGGCTCGTGGGAGGAC	67.193	GAGGAGGAGGAGGAGGAGGAGGGGAGGCGGAGGA	GAGGAGGAGGAGGAGGAGG;GAGGAGGAGGAGGAGGAGGAGG;GAGGAGGAGGAGGAGGAGGAGGGGA;GAGGAGGAGGAGGAGGAGGAGGGGAGGC;GAGGAGGAGGAGGAGGAGGAGGGGAGGCGGA;GAGGAGGAGGAGGAGGAGGAGGGGAGGCGGAGGAAG;GAGGAGGAGGAGGAGGAGGAGGGGAGGCGGAGGAAGG;GAGGAGGAGGAGGAGGAGGAGGGGAGGCGGAGGAAGGA;GAGGAGGAGGAGGAGGAGGAGGGGAGGCGGAGGAAGGAGG	GAGGAGGAGGAGGAGGAGGAGGGGAGGCGGAGGA/GAGGAGGAGGAGGAGGAGGAGGGGAGGCGGAGGA	GAGGAGGAGGAGGAGGAGGAGGGGAGGCGGAGGA/GAGGAGGAGGAGGAGGAGGAGGGGAGGCGGAGGA	GAGGAGGAGGAGGAGGAGGAGGGGAGGCGGAGGA/GAGGAGGAGGAGGAGGAGGAGGGGAGGCGGAGGA	GAGGAGGAGGAGGAGGAGGAGGGGAGGCGGAGGA/GAGGAGGAGGAGGAGGAGGAGGGGAGGCGGAGGA	GAGGAGGAGGAGGAGGAGGAGGGGAGGC/GAGGAGGAGGAGGAGGAGGAGGGGAGGC	GAGGAGGAGGAGGAGGAGGAGGGGAGGC/GAGGAGGAGGAGGAGGAGGAGGGGAGGC	GAGGAGGAGGAGGAGGAGGAGG/GAGGAGGAGGAGGAGGAGGAGG	GAGGAGGAGGAGGAGGAGGAGGGGAGGCGGA/GAGGAGGAGGAGGAGGAGGAGGGGAGGCGGAGGA	GAGGAGGAGGAGGAGGAGGAGGGGAGGCGGAGGA/GAGGAGGAGGAGGAGGAGGAGGGGAGGCGGAGGA	GAGGAGGAGGAGGAGGAGGAGGGGAGGC/GAGGAGGAGGAGGAGGAGGAGGGGAGGC	GAGGAGGAGGAGGAGGAGGAGGGGAGGCGGAGGA/GAGGAGGAGGAGGAGGAGGAGGGGAGGCGGAGGA	GAGGAGGAGGAGGAGGAGGAGGGGAGGCGGAGGA/GAGGAGGAGGAGGAGGAGGAGGGGAGGCGGAGGA	GAGGAGGAGGAGGAGGAGGAGGGGAGGCGGAGGAAGGA/GAGGAGGAGGAGGAGGAGGAGGGGAGGCGGAGGAAGGAGG	GAGGAGGAGGAGGAGGAGGAGGGGAGGCGGAGGA/GAGGAGGAGGAGGAGGAGGAGGGGAGGCGGAGGA	GAGGAGGAGGAGGAGGAGGAGGGGAGGCGGAGGA/GAGGAGGAGGAGGAGGAGGAGGGGAGGCGGAGGA	GAGGAGGAGGAGGAGGAGGAGGGGAGGCGGAGGA/GAGGAGGAGGAGGAGGAGGAGGGGAGGCGGAGGA	GAGGAGGAGGAGGAGGAGG/GAGGAGGAGGAGGAGGAGGAGGGGA	GAGGAGGAGGAGGAGGAGGAGGGGAGGC/GAGGAGGAGGAGGAGGAGGAGGGGAGGCGGA	GAGGAGGAGGAGGAGGAGGAGGGGAGGCGGAGGA/GAGGAGGAGGAGGAGGAGGAGGGGAGGCGGAGGA	GAGGAGGAGGAGGAGGAGGAGGGGAGGCGGA/GAGGAGGAGGAGGAGGAGGAGGGGAGGCGGAGGA	GAGGAGGAGGAGGAGGAGGAGGGGAGGCGGAGGA/GAGGAGGAGGAGGAGGAGGAGGGGAGGCGGAGGA	GAGGAGGAGGAGGAGGAGGAGG/GAGGAGGAGGAGGAGGAGGAGG	GAGGAGGAGGAGGAGGAGG/GAGGAGGAGGAGGAGGAGGAGGGGA	GAGGAGGAGGAGGAGGAGGAGGGGAGGCGGA/GAGGAGGAGGAGGAGGAGGAGGGGAGGCGGAGGA	GAGGAGGAGGAGGAGGAGGAGGGGAGGCGGAGGA/GAGGAGGAGGAGGAGGAGGAGGGGAGGCGGAGGA	GAGGAGGAGGAGGAGGAGGAGGGGAGGCGGAGGA/GAGGAGGAGGAGGAGGAGGAGGGGAGGCGGAGGA	GAGGAGGAGGAGGAGGAGGAGGGGAGGCGGA/GAGGAGGAGGAGGAGGAGGAGGGGAGGCGGAGGA	GAGGAGGAGGAGGAGGAGGAGGGGAGGCGGAGGA/GAGGAGGAGGAGGAGGAGGAGGGGAGGCGGAGGA	GAGGAGGAGGAGGAGGAGGAGG/GAGGAGGAGGAGGAGGAGGAGG	GAGGAGGAGGAGGAGGAGGAGGGGAGGCGGA/GAGGAGGAGGAGGAGGAGGAGGGGAGGCGGA	GAGGAGGAGGAGGAGGAGGAGGGGAGGCGGAGGA/GAGGAGGAGGAGGAGGAGGAGGGGAGGCGGAGGA	GAGGAGGAGGAGGAGGAGGAGGGGAGGCGGAGGA/GAGGAGGAGGAGGAGGAGGAGGGGAGGCGGAGGA	GAGGAGGAGGAGGAGGAGGAGGGGAGGCGGAGGA/GAGGAGGAGGAGGAGGAGGAGGGGAGGCGGAGGA	GAGGAGGAGGAGGAGGAGGAGGGGAGGCGGAGGA/GAGGAGGAGGAGGAGGAGGAGGGGAGGCGGAGGA	GAGGAGGAGGAGGAGGAGGAGG/GAGGAGGAGGAGGAGGAGGAGG	GAGGAGGAGGAGGAGGAGGAGGGGAGGCGGAGGA/GAGGAGGAGGAGGAGGAGGAGGGGAGGCGGAGGA	GAGGAGGAGGAGGAGGAGGAGGGGAGGCGGA/GAGGAGGAGGAGGAGGAGGAGGGGAGGCGGAGGA	GAGGAGGAGGAGGAGGAGGAGGGGAGGCGGAGGA/GAGGAGGAGGAGGAGGAGGAGGGGAGGCGGAGGA	GAGGAGGAGGAGGAGGAGGAGGGGAGGCGGAGGA/GAGGAGGAGGAGGAGGAGGAGGGGAGGCGGAGGA	GAGGAGGAGGAGGAGGAGGAGGGGAGGCGGAGGA/GAGGAGGAGGAGGAGGAGGAGGGGAGGCGGAGGA	GAGGAGGAGGAGGAGGAGGAGG/GAGGAGGAGGAGGAGGAGGAGG
Xunr47	2	68760919	TATATGAATTGTTTCTATATACTATTAAGCAGCATAGAGC	45.583	AATCAACAGTAGTAACTGGTCACAGGGAGAACAAGATTAG	51.381	ATATATATATATATATATATATATATATATATAT	ATATATATATATATATATATATATATATATATAT;ATATATATATATAT;ATATATATATATATATATATA;ATATATATATATATATATATATA;ATATATATATATATATATATATATATATATATA;ATATATATATATATATATATATATATATATATATATATATATATATATATATATA;ATATATATATATATATATATATATATATATATATATATATATATATATATATATATATATATA;ATATATATATATATATATATATATATATATATATATATATATATATATATATATATATATATATATATATATATA;ATATATATATATATATATATATATATATATATATATATATATATATATATATATATATATATATATATATATA…	ATATATATATATATATATATATATATATATATA/ATATATATATATATATATATATATATATATATA	./.	./.	./.	./.	./.	./.	./.	./.	ATATATATATATATATATATATA/ATATATATATATATATATATATA	./.	./.	./.	./.	./.	./.	./.	./.	./.	ATATATATATATATATATATATA/ATATATATATATATATATATATA	./.	./.	./.	./.	./.	./.	./.	./.	./.	./.	./.	./.	./.	./.	ATATATATATATATATATATATA/ATATATATATATATATATATATA	./.	ATATATATATATATATATATATATATATATATA/ATATATATATATATATATATATATATATATATA	ATATATATATATATATATATATA/ATATATATATATATATATATATA	./.	./.	./.
Xunr48	2	72378982	GCACAGGCCCATGGACACGGACAAGAGACCTTCTGACATC	59.237	GATCGGCATTCGGCAACAAACCAAACCAAAACAAAAGGTG	56.095	GGCCTGGGCCTGGGCCTG	GGCCTGGGCCTG;GGCCTGGGCCTGGGCCTGG;GGCCTGGGCCTGGGCCTGGGCCTG;GGCCTGGGCCTGGGCCTGGGCCTGGGCCTG;GGCCTGGGCCTGGGCCTGGGCCTGGGCCTGGGCCTG	GGCCTGGGCCTGGGCCTG/GGCCTGGGCCTGGGCCTG	GGCCTGGGCCTGGGCCTG/GGCCTGGGCCTGGGCCTGGGCCTGGGCCTG	GGCCTGGGCCTGGGCCTG/GGCCTGGGCCTGGGCCTG	GGCCTGGGCCTGGGCCTG/GGCCTGGGCCTGGGCCTG	GGCCTGGGCCTGGGCCTG/GGCCTGGGCCTGGGCCTG	GGCCTGGGCCTG/GGCCTGGGCCTG	GGCCTGGGCCTGGGCCTGGGCCTGGGCCTGGGCCTG/GGCCTGGGCCTGGGCCTGGGCCTGGGCCTGGGCCTG	GGCCTGGGCCTG/GGCCTGGGCCTG	GGCCTGGGCCTGGGCCTG/GGCCTGGGCCTGGGCCTG	GGCCTGGGCCTG/GGCCTGGGCCTG	GGCCTGGGCCTGGGCCTG/GGCCTGGGCCTGGGCCTG	GGCCTGGGCCTGGGCCTG/GGCCTGGGCCTGGGCCTG	GGCCTGGGCCTG/GGCCTGGGCCTG	GGCCTGGGCCTGGGCCTG/GGCCTGGGCCTGGGCCTG	GGCCTGGGCCTGGGCCTG/GGCCTGGGCCTGGGCCTG	GGCCTGGGCCTGGGCCTG/GGCCTGGGCCTGGGCCTG	GGCCTGGGCCTGGGCCTG/GGCCTGGGCCTGGGCCTG	GGCCTGGGCCTG/GGCCTGGGCCTG	GGCCTGGGCCTG/GGCCTGGGCCTG	GGCCTGGGCCTGGGCCTG/GGCCTGGGCCTGGGCCTG	GGCCTGGGCCTGGGCCTG/GGCCTGGGCCTGGGCCTGGGCCTGGGCCTGGGCCTG	GGCCTGGGCCTGGGCCTGGGCCTGGGCCTGGGCCTG/GGCCTGGGCCTGGGCCTGGGCCTGGGCCTGGGCCTG	GGCCTGGGCCTGGGCCTG/GGCCTGGGCCTGGGCCTG	GGCCTGGGCCTGGGCCTG/GGCCTGGGCCTGGGCCTGGGCCTGGGCCTGGGCCTG	GGCCTGGGCCTGGGCCTG/GGCCTGGGCCTGGGCCTG	GGCCTGGGCCTGGGCCTG/GGCCTGGGCCTGGGCCTG	GGCCTGGGCCTGGGCCTG/GGCCTGGGCCTGGGCCTG	GGCCTGGGCCTGGGCCTG/GGCCTGGGCCTGGGCCTG	GGCCTGGGCCTG/GGCCTGGGCCTG	GGCCTGGGCCTGGGCCTG/GGCCTGGGCCTGGGCCTG	GGCCTGGGCCTGGGCCTG/GGCCTGGGCCTGGGCCTG	GGCCTGGGCCTG/GGCCTGGGCCTG	GGCCTGGGCCTGGGCCTG/GGCCTGGGCCTGGGCCTG	GGCCTGGGCCTGGGCCTG/GGCCTGGGCCTGGGCCTG	GGCCTGGGCCTGGGCCTG/GGCCTGGGCCTGGGCCTG	GGCCTGGGCCTGGGCCTG/GGCCTGGGCCTGGGCCTG	GGCCTGGGCCTG/GGCCTGGGCCTG	GGCCTGGGCCTGGGCCTGGGCCTGGGCCTG/GGCCTGGGCCTGGGCCTGGGCCTGGGCCTG	GGCCTGGGCCTGGGCCTG/GGCCTGGGCCTGGGCCTG	GGCCTGGGCCTG/GGCCTGGGCCTG	GGCCTGGGCCTGGGCCTGGGCCTGGGCCTGGGCCTG/GGCCTGGGCCTGGGCCTGGGCCTGGGCCTGGGCCTG
Xunr49	2	73164066	CAGATCATTAACTGGATGCAGAATCGCTTCAATGGTAAAC	52.154	GAGGTAAACAACAACCACCGTGCTACGAAAGGAATCACTC	55.262	CGCCGCCGCCGCCGCCGCCGCC	CGCCGCCGCCGCC;CGCCGCCGCCGCCGCC;CGCCGCCGCCGCCGCCGCC;CGCCGCCGCCGCCGCCGCCGCCGCCG;CGCCGCCGCCGCCGCCGCCGCCGCCGCCGCCGCC;CGCCGCCGCCGCCGCCGCCGCCGCCGCCGCCGCCGCCGCCGCCGCCGCCGCC	CGCCGCCGCCGCCGCCGCCGCC/CGCCGCCGCCGCCGCCGCCGCC	CGCCGCCGCCGCCGCC/CGCCGCCGCCGCCGCCGCCGCC	CGCCGCCGCCGCCGCCGCCGCC/CGCCGCCGCCGCCGCCGCCGCC	CGCCGCCGCCGCCGCCGCCGCC/CGCCGCCGCCGCCGCCGCCGCC	CGCCGCCGCCGCCGCCGCCGCC/CGCCGCCGCCGCCGCCGCCGCC	CGCCGCCGCCGCCGCCGCCGCC/CGCCGCCGCCGCCGCCGCCGCC	CGCCGCCGCCGCCGCCGCCGCC/CGCCGCCGCCGCCGCCGCCGCC	CGCCGCCGCCGCCGCCGCC/CGCCGCCGCCGCCGCCGCCGCC	CGCCGCCGCCGCCGCCGCCGCC/CGCCGCCGCCGCCGCCGCCGCC	CGCCGCCGCCGCCGCCGCCGCC/CGCCGCCGCCGCCGCCGCCGCC	CGCCGCCGCCGCCGCCGCCGCC/CGCCGCCGCCGCCGCCGCCGCC	CGCCGCCGCCGCCGCCGCCGCC/CGCCGCCGCCGCCGCCGCCGCC	./.	CGCCGCCGCCGCCGCCGCCGCC/CGCCGCCGCCGCCGCCGCCGCC	CGCCGCCGCCGCCGCCGCCGCC/CGCCGCCGCCGCCGCCGCCGCC	CGCCGCCGCCGCCGCCGCCGCC/CGCCGCCGCCGCCGCCGCCGCC	CGCCGCCGCCGCCGCCGCCGCC/CGCCGCCGCCGCCGCCGCCGCC	CGCCGCCGCCGCCGCCGCCGCC/CGCCGCCGCCGCCGCCGCCGCC	CGCCGCCGCCGCCGCCGCCGCC/CGCCGCCGCCGCCGCCGCCGCC	CGCCGCCGCCGCCGCCGCCGCC/CGCCGCCGCCGCCGCCGCCGCC	CGCCGCCGCCGCCGCCGCCGCC/CGCCGCCGCCGCCGCCGCCGCC	CGCCGCCGCCGCCGCCGCCGCC/CGCCGCCGCCGCCGCCGCCGCC	CGCCGCCGCCGCCGCCGCCGCC/CGCCGCCGCCGCCGCCGCCGCC	CGCCGCCGCCGCCGCCGCCGCC/CGCCGCCGCCGCCGCCGCCGCC	CGCCGCCGCCGCCGCCGCCGCC/CGCCGCCGCCGCCGCCGCCGCC	CGCCGCCGCCGCCGCCGCCGCC/CGCCGCCGCCGCCGCCGCCGCC	CGCCGCCGCCGCCGCCGCCGCC/CGCCGCCGCCGCCGCCGCCGCC	CGCCGCCGCCGCCGCCGCCGCC/CGCCGCCGCCGCCGCCGCCGCC	CGCCGCCGCCGCCGCCGCCGCC/CGCCGCCGCCGCCGCCGCCGCC	CGCCGCCGCCGCCGCCGCCGCC/CGCCGCCGCCGCCGCCGCCGCC	CGCCGCCGCCGCCGCCGCCGCC/CGCCGCCGCCGCCGCCGCCGCC	./.	CGCCGCCGCCGCCGCCGCCGCC/CGCCGCCGCCGCCGCCGCCGCC	CGCCGCCGCCGCCGCCGCCGCC/CGCCGCCGCCGCCGCCGCCGCC	CGCCGCCGCCGCCGCCGCCGCC/CGCCGCCGCCGCCGCCGCCGCC	CGCCGCCGCCGCCGCCGCCGCC/CGCCGCCGCCGCCGCCGCCGCC	CGCCGCCGCCGCCGCCGCC/CGCCGCCGCCGCCGCCGCCGCC	CGCCGCCGCCGCCGCCGCCGCC/CGCCGCCGCCGCCGCCGCCGCC	CGCCGCCGCCGCCGCCGCCGCC/CGCCGCCGCCGCCGCCGCCGCC	CGCCGCCGCCGCCGCCGCCGCC/CGCCGCCGCCGCCGCCGCCGCC	CGCCGCCGCCGCCGCCGCCGCC/CGCCGCCGCCGCCGCCGCCGCC
Xunr50	2	73734692	ACATGTATACAGAAATAAAACCAGCGGTGTTGAAGGCTAC	52.578	CGAGAATTTTTCTATGATCGTAACTGCCTCCGTGTTTCTC	52.935	AATAATAAATAAATAAATAAATAAATAAATAAATAAAT	AATAATAAATAAAT;AATAATAAATAAATAAAT;AATAATAAATAAATAAATAAAT;AATAATAAATAAATAAATAAATAAAT;AATAATAAATAAATAAATAAATAAATAAAT;AATAATAAATAAATAAATAAATAAATAAATAAA;AATAATAAATAAATAAATAAATAAATAAATAAAT;AATAATAAATAAATAAATAAATAAATAAATAAATAAATTAAA;AATAATAAATAAATAAATAAATAAATAAATAAATAAATTAAATAAA	AATAATAAATAAATAAATAAATAAATAAATAAATAAAT/AATAATAAATAAATAAATAAATAAATAAATAAATAAAT	AATAATAAATAAATAAATAAATAAATAAATAAAT/AATAATAAATAAATAAATAAATAAATAAATAAATAAATTAAATAAA	AATAATAAATAAATAAATAAATAAATAAATAAATAAAT/AATAATAAATAAATAAATAAATAAATAAATAAATAAAT	AATAATAAATAAATAAATAAATAAATAAAT/AATAATAAATAAATAAATAAATAAATAAAT	AATAATAAATAAATAAATAAATAAATAAAT/AATAATAAATAAATAAATAAATAAATAAAT	AATAATAAATAAATAAATAAATAAATAAAT/AATAATAAATAAATAAATAAATAAATAAAT	AATAATAAATAAATAAATAAATAAATAAATAAATAAATTAAA/AATAATAAATAAATAAATAAATAAATAAATAAATAAATTAAA	AATAATAAATAAATAAATAAATAAATAAATAAATAAATTAAATAAA/AATAATAAATAAATAAATAAATAAATAAATAAATAAATTAAATAAA	AATAATAAATAAATAAATAAATAAATAAATAAATAAAT/AATAATAAATAAATAAATAAATAAATAAATAAATAAAT	AATAATAAATAAATAAATAAATAAATAAATAAATAAATTAAA/AATAATAAATAAATAAATAAATAAATAAATAAATAAATTAAA	AATAATAAATAAATAAATAAATAAATAAATAAA/AATAATAAATAAATAAATAAATAAATAAATAAAT	AATAATAAATAAATAAATAAATAAATAAATAAATAAAT/AATAATAAATAAATAAATAAATAAATAAATAAATAAAT	AATAATAAATAAATAAATAAATAAATAAATAAAT/AATAATAAATAAATAAATAAATAAATAAATAAAT	AATAATAAATAAATAAATAAATAAATAAAT/AATAATAAATAAATAAATAAATAAATAAAT	AATAATAAATAAATAAATAAATAAATAAATAAAT/AATAATAAATAAATAAATAAATAAATAAATAAATAAAT	AATAATAAATAAATAAATAAATAAATAAATAAATAAAT/AATAATAAATAAATAAATAAATAAATAAATAAATAAAT	AATAATAAATAAATAAATAAATAAATAAAT/AATAATAAATAAATAAATAAATAAATAAAT	AATAATAAATAAATAAATAAATAAATAAAT/AATAATAAATAAATAAATAAATAAATAAAT	AATAATAAATAAATAAATAAATAAATAAAT/AATAATAAATAAATAAATAAATAAATAAAT	AATAATAAATAAATAAATAAATAAATAAAT/AATAATAAATAAATAAATAAATAAATAAAT	AATAATAAATAAATAAATAAATAAATAAATAAATAAAT/AATAATAAATAAATAAATAAATAAATAAATAAATAAATTAAA	AATAATAAATAAATAAATAAATAAATAAATAAATAAATTAAA/AATAATAAATAAATAAATAAATAAATAAATAAATAAATTAAA	AATAATAAATAAATAAATAAATAAATAAATAAATAAATTAAA/AATAATAAATAAATAAATAAATAAATAAATAAATAAATTAAA	AATAATAAATAAATAAATAAATAAATAAAT/AATAATAAATAAATAAATAAATAAATAAAT	AATAATAAATAAATAAATAAATAAATAAATAAATAAAT/AATAATAAATAAATAAATAAATAAATAAATAAATAAAT	AATAATAAATAAATAAATAAATAAATAAATAAATAAAT/AATAATAAATAAATAAATAAATAAATAAATAAATAAAT	AATAATAAATAAATAAATAAATAAATAAATAAAT/AATAATAAATAAATAAATAAATAAATAAATAAAT	AATAATAAATAAATAAATAAATAAATAAATAAATAAAT/AATAATAAATAAATAAATAAATAAATAAATAAATAAAT	AATAATAAATAAATAAATAAATAAATAAAT/AATAATAAATAAATAAATAAATAAATAAAT	AATAATAAATAAATAAATAAATAAATAAATAAATAAATTAAA/AATAATAAATAAATAAATAAATAAATAAATAAATAAATTAAA	AATAATAAATAAATAAATAAATAAATAAAT/AATAATAAATAAATAAATAAATAAATAAAT	./.	AATAATAAATAAATAAATAAATAAATAAATAAATAAAT/AATAATAAATAAATAAATAAATAAATAAATAAATAAAT	AATAATAAATAAATAAATAAATAAATAAATAAATAAAT/AATAATAAATAAATAAATAAATAAATAAATAAATAAAT	AATAATAAATAAATAAATAAATAAATAAAT/AATAATAAATAAATAAATAAATAAATAAAT	AATAATAAATAAATAAATAAATAAATAAATAAATAAAT/AATAATAAATAAATAAATAAATAAATAAATAAATAAAT	AATAATAAATAAATAAATAAAT/AATAATAAATAAATAAATAAAT	AATAATAAATAAATAAATAAATAAATAAAT/AATAATAAATAAATAAATAAATAAATAAAT	AATAATAAATAAATAAATAAATAAATAAATAAATAAAT/AATAATAAATAAATAAATAAATAAATAAATAAATAAAT	AATAATAAATAAATAAATAAATAAATAAAT/AATAATAAATAAATAAATAAATAAATAAAT	AATAATAAATAAATAAATAAATAAATAAATAAATAAATTAAA/AATAATAAATAAATAAATAAATAAATAAATAAATAAATTAAA
Xunr51	2	74272983	ACCTCCGGTCCGGACAAGCTAGCGCATGGTAACGTGGTTG	61.457	ACGGCGCTGGCTGATGCGCCTCGCTGACGGACGGATTCAC	65.563	ATCTCATCTCATCTCATCTCATCTCATCTCATCTCATCTCATCTCATC	ATCTCATCTCATCTCATCTCATC;ATCTCATCTCATCTCATCTCATCTCATC;ATCTCATCTCATCTCATCTCATCTCATCTCATC;ATCTCATCTCATCTCATCTCATCTCATCTCATCTCATC;ATCTCATCTCATCTCATCTCATCTCATCTCATCTCATCTCATC;ATCTCATCTCATCTCATCTCATCTCATCTCATCTCATCTCATCTCATCTCATC;ATCTCATCTCATCTCATCTCATCTCATCTCATCTCATCTCATCTCATCTCATCTCATCTCATCTCATCTCATC;ATCTCATCTCATCTCATCTCATCTCATCTCATCTCATCTCATCTCATCTCATCTCATCTCATCTCATCTCATCTCAT	ATCTCATCTCATCTCATCTCATCTCATCTCATCTCATCTCATC/ATCTCATCTCATCTCATCTCATCTCATCTCATCTCATCTCATC	ATCTCATCTCATCTCATCTCATCTCATCTCATCTCATCTCATC/ATCTCATCTCATCTCATCTCATCTCATCTCATCTCATCTCATC	ATCTCATCTCATCTCATCTCATCTCATCTCATCTCATCTCATC/ATCTCATCTCATCTCATCTCATCTCATCTCATCTCATCTCATC	./.	ATCTCATCTCATCTCATCTCATCTCATCTCATCTCATCTCATC/ATCTCATCTCATCTCATCTCATCTCATCTCATCTCATCTCATC	ATCTCATCTCATCTCATCTCATCTCATCTCATCTCATCTCATC/ATCTCATCTCATCTCATCTCATCTCATCTCATCTCATCTCATC	ATCTCATCTCATCTCATCTCATCTCATCTCATCTCATCTCATC/ATCTCATCTCATCTCATCTCATCTCATCTCATCTCATCTCATC	ATCTCATCTCATCTCATCTCATCTCATC/ATCTCATCTCATCTCATCTCATCTCATC	ATCTCATCTCATCTCATCTCATCTCATCTCATCTCATCTCATC/ATCTCATCTCATCTCATCTCATCTCATCTCATCTCATCTCATC	ATCTCATCTCATCTCATCTCATCTCATCTCATCTCATCTCATC/ATCTCATCTCATCTCATCTCATCTCATCTCATCTCATCTCATC	ATCTCATCTCATCTCATCTCATCTCATCTCATCTCATCTCATCTCATC/ATCTCATCTCATCTCATCTCATCTCATCTCATCTCATCTCATCTCATC	ATCTCATCTCATCTCATCTCATCTCATCTCATCTCATCTCATCTCATC/ATCTCATCTCATCTCATCTCATCTCATCTCATCTCATCTCATCTCATC	ATCTCATCTCATCTCATCTCATCTCATC/ATCTCATCTCATCTCATCTCATCTCATCTCATC	ATCTCATCTCATCTCATCTCATCTCATCTCATCTCATCTCATC/ATCTCATCTCATCTCATCTCATCTCATCTCATCTCATCTCATC	ATCTCATCTCATCTCATCTCATCTCATCTCATCTCATCTCATC/ATCTCATCTCATCTCATCTCATCTCATCTCATCTCATCTCATC	ATCTCATCTCATCTCATCTCATCTCATCTCATCTCATCTCATC/ATCTCATCTCATCTCATCTCATCTCATCTCATCTCATCTCATC	ATCTCATCTCATCTCATCTCATCTCATC/ATCTCATCTCATCTCATCTCATCTCATC	ATCTCATCTCATCTCATCTCATCTCATC/ATCTCATCTCATCTCATCTCATCTCATC	ATCTCATCTCATCTCATCTCATCTCATCTCATC/ATCTCATCTCATCTCATCTCATCTCATCTCATC	ATCTCATCTCATCTCATCTCATCTCATC/ATCTCATCTCATCTCATCTCATCTCATC	ATCTCATCTCATCTCATCTCATCTCATCTCATCTCATC/ATCTCATCTCATCTCATCTCATCTCATCTCATCTCATC	ATCTCATCTCATCTCATCTCATCTCATCTCATCTCATCTCATCTCATC/ATCTCATCTCATCTCATCTCATCTCATCTCATCTCATCTCATCTCATC	ATCTCATCTCATCTCATCTCATCTCATCTCATCTCATCTCATCTCATC/ATCTCATCTCATCTCATCTCATCTCATCTCATCTCATCTCATCTCATC	ATCTCATCTCATCTCATCTCATCTCATCTCATCTCATCTCATC/ATCTCATCTCATCTCATCTCATCTCATCTCATCTCATCTCATC	ATCTCATCTCATCTCATCTCATCTCATCTCATCTCATCTCATCTCATC/ATCTCATCTCATCTCATCTCATCTCATCTCATCTCATCTCATCTCATC	ATCTCATCTCATCTCATCTCATCTCATCTCATCTCATCTCATC/ATCTCATCTCATCTCATCTCATCTCATCTCATCTCATCTCATC	ATCTCATCTCATCTCATCTCATCTCATCTCATCTCATCTCATC/ATCTCATCTCATCTCATCTCATCTCATCTCATCTCATCTCATC	ATCTCATCTCATCTCATCTCATCTCATCTCATCTCATCTCATC/ATCTCATCTCATCTCATCTCATCTCATCTCATCTCATCTCATC	ATCTCATCTCATCTCATCTCATCTCATCTCATCTCATCTCATC/ATCTCATCTCATCTCATCTCATCTCATCTCATCTCATCTCATC	ATCTCATCTCATCTCATCTCATCTCATCTCATCTCATCTCATCTCATC/ATCTCATCTCATCTCATCTCATCTCATCTCATCTCATCTCATCTCATC	ATCTCATCTCATCTCATCTCATCTCATCTCATCTCATCTCATC/ATCTCATCTCATCTCATCTCATCTCATCTCATCTCATCTCATC	ATCTCATCTCATCTCATCTCATCTCATC/ATCTCATCTCATCTCATCTCATCTCATC	ATCTCATCTCATCTCATCTCATCTCATCTCATCTCATC/ATCTCATCTCATCTCATCTCATCTCATCTCATCTCATC	ATCTCATCTCATCTCATCTCATCTCATCTCATCTCATCTCATC/ATCTCATCTCATCTCATCTCATCTCATCTCATCTCATCTCATC	ATCTCATCTCATCTCATCTCATCTCATCTCATCTCATCTCATC/ATCTCATCTCATCTCATCTCATCTCATCTCATCTCATCTCATC	ATCTCATCTCATCTCATCTCATCTCATCTCATCTCATCTCATC/ATCTCATCTCATCTCATCTCATCTCATCTCATCTCATCTCATC	ATCTCATCTCATCTCATCTCATCTCATCTCATCTCATCTCATCTCATC/ATCTCATCTCATCTCATCTCATCTCATCTCATCTCATCTCATCTCATC	ATCTCATCTCATCTCATCTCATCTCATCTCATCTCATCTCATC/ATCTCATCTCATCTCATCTCATCTCATCTCATCTCATCTCATC	ATCTCATCTCATCTCATCTCATCTCATCTCATCTCATCTCATC/ATCTCATCTCATCTCATCTCATCTCATCTCATCTCATCTCATC	ATCTCATCTCATCTCATCTCATCTCATCTCATCTCATCTCATCTCATC/ATCTCATCTCATCTCATCTCATCTCATCTCATCTCATCTCATCTCATC	ATCTCATCTCATCTCATCTCATCTCATCTCATCTCATC/ATCTCATCTCATCTCATCTCATCTCATCTCATCTCATC
Xunr52	2	74477577	ATCATTTATGTAGTAGTGAATGGCATGCAAGACTATTCAC	49.971	GATATATTGTATCCAAGCTGCATTTTTATAATGATACAAC	46.125	AGAGAGAGAGAGAGAGAGAGAGAGAGAGAGAGA	AGAGAGAGAGAGAGAGAGAGAGAGAGAGAGAGA;AGAGAGAGAGA;AGAGAGAGAGAGA;AGAGAGAGAGAGAGA;AGAGAGAGAGAGAGAGA;AGAGAGAGAGAGAGAGAGAGA;AGAGAGAGAGAGAGAGAGAGAGA;AGAGAGAGAGAGAGAGAGAGAGAGA;AGAGAGAGAGAGAGAGAGAGAGAGAGA;AGAGAGAGAGAGAGAGAGAGAGAGAGAGA;AGAGAGAGAGAGAGAGAGAGAGAGAGAGAGA;AGAGAGAGAGAGAGAGAGAGAGAGAGAGAGAGAGA;AGAGAGAGAGAGAGAGAGAGAGAGAGAGAGAGAGAGA;AGAGAGAGAGAGAGAGAGAGAGAGAGAGAGAGAGAGAGA;AGAGAGAGAGAGAGAGAGAGAGAGAGAGA…	AGAGAGAGAGAGAGAGAGAGAGAGA/AGAGAGAGAGAGAGAGAGAGAGAGAGAGAGAGA	AGAGAGAGAGAGAGAGAGAGAGAGAGAGAGAGAGAGA/AGAGAGAGAGAGAGAGAGAGAGAGAGAGAGAGAGAGAGA	AGAGAGAGAGAGAGAGAGAGAGAGAGAGA/AGAGAGAGAGAGAGAGAGAGAGAGAGAGAGAGAGAGAGAGAGAGAGAGA	AGAGAGAGAGAGAGAGAGAGAGAGAGAGA/AGAGAGAGAGAGAGAGAGAGAGAGAGAGAGAGA	AGAGAGAGAGAGAGAGAGAGAGAGAGA/AGAGAGAGAGAGAGAGAGAGAGAGAGAGAGA	AGAGAGAGAGAGAGAGAGAGAGA/AGAGAGAGAGAGAGAGAGAGAGAGAGA	AGAGAGAGAGAGAGAGAGAGAGAGAGAGAGA/AGAGAGAGAGAGAGAGAGAGAGAGAGAGAGAGA	AGAGAGAGAGAGAGAGAGAGA/AGAGAGAGAGAGAGAGAGAGAGA	AGAGAGAGAGAGAGAGAGAGAGAGAGAGA/AGAGAGAGAGAGAGAGAGAGAGAGAGAGAGA	AGAGAGAGAGAGAGA/AGAGAGAGAGAGAGAGA	AGAGAGAGAGAGAGAGAGAGAGAGAGAGA/AGAGAGAGAGAGAGAGAGAGAGAGAGAGAGA	AGAGAGAGAGAGAGAGAGAGAGA/AGAGAGAGAGAGAGAGAGAGAGAGA	AGAGAGAGAGAGAGAGAGAGA/AGAGAGAGAGAGAGAGAGAGAGA	AGAGAGAGAGAGAGAGAGAGAGAGAGAGAGA/AGAGAGAGAGAGAGAGAGAGAGAGAGAGAGAGAGAGAGAGA	AGAGAGAGAGAGAGAGAGAGAGAGAGA/AGAGAGAGAGAGAGAGAGAGAGAGAGAGA	AGAGAGAGAGAGAGAGAGAGAGA/AGAGAGAGAGAGAGAGAGAGAGAGA	AGAGAGAGAGAGAGAGAGAGAGAGA/AGAGAGAGAGAGAGAGAGAGAGAGA	AGAGAGAGAGAGAGAGAGAGAGAGAGAGAGAGAGAGAGAGAGA/AGAGAGAGAGAGAGAGAGAGAGAGAGAGAGAGAGAGAGAGAGA	AGAGAGAGAGAGAGAGAGAGAGAGA/AGAGAGAGAGAGAGAGAGAGAGAGAGAGAGA	AGAGAGAGAGAGAGAGAGAGAGAGAGAGAGAGAGA/AGAGAGAGAGAGAGAGAGAGAGAGAGAGAGAGAGAGA	AGAGAGAGAGAGAGAGAGAGAGAGAGAGA/AGAGAGAGAGAGAGAGAGAGAGAGAGAGAGAGA	AGAGAGAGAGAGAGAGA/AGAGAGAGAGAGAGAGAGAGAGAGAGAGAGAGA	AGAGAGAGAGAGAGAGAGAGAGAGAGA/AGAGAGAGAGAGAGAGAGAGAGAGAGAGAGA	AGAGAGAGAGAGAGAGAGAGAGAGA/AGAGAGAGAGAGAGAGAGAGAGAGAGAGAGAGA	AGAGAGAGAGAGAGAGAGAGAGAGAGAGAGA/AGAGAGAGAGAGAGAGAGAGAGAGAGAGAGAGA	AGAGAGAGAGAGAGAGAGAGAGA/AGAGAGAGAGAGAGAGAGAGAGAGA	AGAGAGAGAGAGAGAGAGAGAGAGAGA/AGAGAGAGAGAGAGAGAGAGAGAGAGAGA	AGAGAGAGAGA/AGAGAGAGAGAGAGAGAGAGAGA	AGAGAGAGAGAGAGAGAGAGAGAGAGA/AGAGAGAGAGAGAGAGAGAGAGAGAGAGA	AGAGAGAGAGAGAGAGAGAGAGA/AGAGAGAGAGAGAGAGAGAGAGAGA	AGAGAGAGAGAGAGAGAGAGAGA/AGAGAGAGAGAGAGAGAGAGAGAGAGAGAGAGAGA	AGAGAGAGAGAGAGAGAGAGAGA/AGAGAGAGAGAGAGAGAGAGAGAGA	./.	AGAGAGAGAGAGAGAGAGAGAGA/AGAGAGAGAGAGAGAGAGAGAGAGA	AGAGAGAGAGAGAGAGAGAGAGAGAGAGAGAGAGAGAGA/AGAGAGAGAGAGAGAGAGAGAGAGAGAGAGAGAGAGAGAGA	AGAGAGAGAGAGAGAGAGAGAGAGAGAGAGAGAGAGAGAGAGA/AGAGAGAGAGAGAGAGAGAGAGAGAGAGAGAGAGAGAGAGAGA	AGAGAGAGAGAGAGAGAGAGAGAGAGAGAGA/AGAGAGAGAGAGAGAGAGAGAGAGAGAGAGAGA	AGAGAGAGAGAGAGAGAGAGAGAGAGAGA/AGAGAGAGAGAGAGAGAGAGAGAGAGAGAGA	AGAGAGAGAGAGAGAGAGAGAGAGAGAGAGAGA/AGAGAGAGAGAGAGAGAGAGAGAGAGAGAGAGAGA	AGAGAGAGAGAGAGAGAGAGAGAGAGAGAGA/AGAGAGAGAGAGAGAGAGAGAGAGAGAGAGAGA	AGAGAGAGAGAGAGAGAGAGAGAGAGAGAGA/AGAGAGAGAGAGAGAGAGAGAGAGAGAGAGAGA
Xunr53	2	74603748	GAGCTCTTTTCTTTTTCTCCAGTTTCTTTTGGTCGTCTCC	53.105	TGTGCTGTGCTGTGCCACCCCAACCCCACCAGGCCATTCC	64.163	TGTGTGTGTTGTGCTGTGCTGTGCTGTGCT	TGTGTGTGTTGTGCTGTGCT;TGTGTGTGTTGTGCTGTGCTGTGCTGTG;TGTGTGTGTTGTGCTGTGCTGTGCTGTGCTTG;TGTGTGTGTTGTGCTGTGCTGTGCTGTGCTTGTGT	TGTGTGTGTTGTGCTGTGCTGTGCTGTGCT/TGTGTGTGTTGTGCTGTGCTGTGCTGTGCT	TGTGTGTGTTGTGCTGTGCTGTGCTGTGCT/TGTGTGTGTTGTGCTGTGCTGTGCTGTGCT	TGTGTGTGTTGTGCTGTGCTGTGCTGTGCT/TGTGTGTGTTGTGCTGTGCTGTGCTGTGCT	./.	TGTGTGTGTTGTGCTGTGCTGTGCTGTGCT/TGTGTGTGTTGTGCTGTGCTGTGCTGTGCT	TGTGTGTGTTGTGCTGTGCTGTGCTGTGCT/TGTGTGTGTTGTGCTGTGCTGTGCTGTGCT	TGTGTGTGTTGTGCTGTGCTGTGCTGTGCT/TGTGTGTGTTGTGCTGTGCTGTGCTGTGCT	./.	TGTGTGTGTTGTGCTGTGCTGTGCTGTGCT/TGTGTGTGTTGTGCTGTGCTGTGCTGTGCT	./.	TGTGTGTGTTGTGCTGTGCTGTGCTGTGCT/TGTGTGTGTTGTGCTGTGCTGTGCTGTGCT	TGTGTGTGTTGTGCTGTGCTGTGCTGTGCT/TGTGTGTGTTGTGCTGTGCTGTGCTGTGCT	TGTGTGTGTTGTGCTGTGCTGTGCTGTGCT/TGTGTGTGTTGTGCTGTGCTGTGCTGTGCT	TGTGTGTGTTGTGCTGTGCTGTGCTGTGCTTGTGT/TGTGTGTGTTGTGCTGTGCTGTGCTGTGCTTGTGT	TGTGTGTGTTGTGCTGTGCTGTGCTGTGCT/TGTGTGTGTTGTGCTGTGCTGTGCTGTGCT	./.	TGTGTGTGTTGTGCTGTGCTGTGCTGTGCT/TGTGTGTGTTGTGCTGTGCTGTGCTGTGCT	TGTGTGTGTTGTGCTGTGCTGTGCTGTGCT/TGTGTGTGTTGTGCTGTGCTGTGCTGTGCT	TGTGTGTGTTGTGCTGTGCTGTGCTGTGCT/TGTGTGTGTTGTGCTGTGCTGTGCTGTGCT	TGTGTGTGTTGTGCTGTGCTGTGCTGTGCT/TGTGTGTGTTGTGCTGTGCTGTGCTGTGCT	TGTGTGTGTTGTGCTGTGCTGTGCTGTGCT/TGTGTGTGTTGTGCTGTGCTGTGCTGTGCT	TGTGTGTGTTGTGCTGTGCTGTGCTGTGCT/TGTGTGTGTTGTGCTGTGCTGTGCTGTGCT	TGTGTGTGTTGTGCTGTGCTGTGCTGTGCT/TGTGTGTGTTGTGCTGTGCTGTGCTGTGCT	TGTGTGTGTTGTGCTGTGCTGTGCTGTGCT/TGTGTGTGTTGTGCTGTGCTGTGCTGTGCT	TGTGTGTGTTGTGCTGTGCTGTGCTGTGCT/TGTGTGTGTTGTGCTGTGCTGTGCTGTGCT	TGTGTGTGTTGTGCTGTGCTGTGCTGTGCT/TGTGTGTGTTGTGCTGTGCTGTGCTGTGCT	TGTGTGTGTTGTGCTGTGCTGTGCTGTGCT/TGTGTGTGTTGTGCTGTGCTGTGCTGTGCT	TGTGTGTGTTGTGCTGTGCTGTGCTGTGCT/TGTGTGTGTTGTGCTGTGCTGTGCTGTGCT	TGTGTGTGTTGTGCTGTGCTGTGCTGTGCT/TGTGTGTGTTGTGCTGTGCTGTGCTGTGCT	TGTGTGTGTTGTGCTGTGCTGTGCTGTGCT/TGTGTGTGTTGTGCTGTGCTGTGCTGTGCT	TGTGTGTGTTGTGCTGTGCTGTGCTGTGCT/TGTGTGTGTTGTGCTGTGCTGTGCTGTGCT	TGTGTGTGTTGTGCTGTGCTGTGCTGTGCT/TGTGTGTGTTGTGCTGTGCTGTGCTGTGCT	TGTGTGTGTTGTGCTGTGCTGTGCTGTGCT/TGTGTGTGTTGTGCTGTGCTGTGCTGTGCT	TGTGTGTGTTGTGCTGTGCTGTGCTGTGCT/TGTGTGTGTTGTGCTGTGCTGTGCTGTGCT	TGTGTGTGTTGTGCTGTGCTGTGCTGTGCT/TGTGTGTGTTGTGCTGTGCTGTGCTGTGCT	TGTGTGTGTTGTGCTGTGCTGTGCTGTGCT/TGTGTGTGTTGTGCTGTGCTGTGCTGTGCT	./.	TGTGTGTGTTGTGCTGTGCTGTGCTGTGCT/TGTGTGTGTTGTGCTGTGCTGTGCTGTGCTTG	TGTGTGTGTTGTGCTGTGCTGTGCTGTGCT/TGTGTGTGTTGTGCTGTGCTGTGCTGTGCT	TGTGTGTGTTGTGCTGTGCT/TGTGTGTGTTGTGCTGTGCTGTGCTGTGCT	TGTGTGTGTTGTGCTGTGCTGTGCTGTGCT/TGTGTGTGTTGTGCTGTGCTGTGCTGTGCT
Xunr54	3	1971075	GCGGCGGACGTGGCGACAGATCCATCGGATCTAGTGGCAG	62.783	TGGGGAAGATAGGGGAGAGCTCGTTTGAATCCCATAAAGC	55.961	CTTCTTCTTCTTCTTCTTCTTCTTCTTCTTCTTCT	CTTCTTCTTCTTCTTCTTCTTCTTCTTCTTCTTCT;CTTCTTCTTCTTCTTCTTCTTCTTCTTCTTCT;CTTCTTCTTCTTCTTCTTCTTCTTCTTCTTCTTCTTCT;CTTCTTCTTCTTCTTCTTCTTCTTCTTCTTCTTCTTCTTC;CTTCTTCTTCTTCTTCTTCTTCTTCTTCTTCTTCTTCTTCT;CTTCTTCTTCTTCTTCTTCTTCTTCTTCTTCTTCTTCTTCTT;CTTCTTCTTCTTCTTCTTCTTCTTCTTCTTCTTCTTCTTCTTC;CTTCTTCTTCTTCTTCTTCTTCTTCTTCTTCTTCTTCTTCTTCT;CTTCTTCTTCTTCTTCTTCTTCTTCTTCTTCTTCTTCTTCTTCTT;CTTCTTCTTCTTCTTCTTCTTCTTCTTCTT…	./.	CTTCTTCTTCTTCTTCTTCTTCTTCTTCTTCTTCTTCTTCTTCTTCTTCTTCTTCTTCTTCT/CTTCTTCTTCTTCTTCTTCTTCTTCTTCTTCTTCTTCTTCTTCTTCTTCTTCTTCTTCTTCTTCT	CTTCTTCTTCTTCTTCTTCTTCTTCTTCTTCTTCTTCTTCTTCTTCTTCTTCT/CTTCTTCTTCTTCTTCTTCTTCTTCTTCTTCTTCTTCTTCTTCTTCTTCTTCTTCT	CTTCTTCTTCTTCTTCTTCTTCTTCTTCTTCTTCTTCT/CTTCTTCTTCTTCTTCTTCTTCTTCTTCTTCTTCTTCTTCT	CTTCTTCTTCTTCTTCTTCTTCTTCTTCTTCTTCTTCTTCTTCT/CTTCTTCTTCTTCTTCTTCTTCTTCTTCTTCTTCTTCTTCTTCTTCT	CTTCTTCTTCTTCTTCTTCTTCTTCTTCTTCTTCTTCTTCTTCTTCTTCTTCTTCTTCT/CTTCTTCTTCTTCTTCTTCTTCTTCTTCTTCTTCTTCTTCTTCTTCTTCTTCTTCTTCTTCTTCTTCTTCT	CTTCTTCTTCTTCTTCTTCTTCTTCTTCTTCTTCTTCTTCTTCTTCT/CTTCTTCTTCTTCTTCTTCTTCTTCTTCTTCTTCTTCTTCTTCTTCTTCT	CTTCTTCTTCTTCTTCTTCTTCTTCTTCTTCTTCTTCTTCTTCTTCTTCTTCT/CTTCTTCTTCTTCTTCTTCTTCTTCTTCTTCTTCTTCTTCTTCTTCTTCTTCT	CTTCTTCTTCTTCTTCTTCTTCTTCTTCTTCTTCTTCTTCTTCTTCTTCT/CTTCTTCTTCTTCTTCTTCTTCTTCTTCTTCTTCTTCTTCTTCTTCTTCTTCTTCTTCTTCTTCTTCTTCTTCT	CTTCTTCTTCTTCTTCTTCTTCTTCTTCTTCTTCTTCTTCTTCTTCTTCT/CTTCTTCTTCTTCTTCTTCTTCTTCTTCTTCTTCTTCTTCTTCTTCTTCTTCT	CTTCTTCTTCTTCTTCTTCTTCTTCTTCTTCTTCTTCTTCTTCTTCTTCTTCTTCTTCTTCT/CTTCTTCTTCTTCTTCTTCTTCTTCTTCTTCTTCTTCTTCTTCTTCTTCTTCTTCTTCTTCTTCTTCT	CTTCTTCTTCTTCTTCTTCTTCTTCTTCTTCTTCTTCT/CTTCTTCTTCTTCTTCTTCTTCTTCTTCTTCTTCTTCTTCTTCTTCTTCTTCTTCTTCT	CTTCTTCTTCTTCTTCTTCTTCTTCTTCTTCTTCTTCTTCTTCTTCTTCT/CTTCTTCTTCTTCTTCTTCTTCTTCTTCTTCTTCTTCTTCTTCTTCTTCTTCT	CTTCTTCTTCTTCTTCTTCTTCTTCTTCTTCTTCTTCTTCTTCT/CTTCTTCTTCTTCTTCTTCTTCTTCTTCTTCTTCTTCTTCTTCTTCT	CTTCTTCTTCTTCTTCTTCTTCTTCTTCTTCTTCTTCTTCTTCTTCT/CTTCTTCTTCTTCTTCTTCTTCTTCTTCTTCTTCTTCTTCTTCTTCTTCT	CTTCTTCTTCTTCTTCTTCTTCTTCTTCTTCTTCTTCTTCTTCTTCTTCTTCTTCT/CTTCTTCTTCTTCTTCTTCTTCTTCTTCTTCTTCTTCTTCTTCTTCTTCTTCTTCTTCTTCT	CTTCTTCTTCTTCTTCTTCTTCTTCTTCTTCTTCTTCTTCTTCTTCT/CTTCTTCTTCTTCTTCTTCTTCTTCTTCTTCTTCTTCTTCTTCTTCTTCT	CTTCTTCTTCTTCTTCTTCTTCTTCTTCTTCTTCT/CTTCTTCTTCTTCTTCTTCTTCTTCTTCTTCTTCT	CTTCTTCTTCTTCTTCTTCTTCTTCTTCTTCTTCTTCTTCTTCT/CTTCTTCTTCTTCTTCTTCTTCTTCTTCTTCTTCTTCTTCTTCTTCT	CTTCTTCTTCTTCTTCTTCTTCTTCTTCTTCTTCTTCTTCTTCTTCT/CTTCTTCTTCTTCTTCTTCTTCTTCTTCTTCTTCTTCTTCTTCTTCTTCTTCTTCTTCTTCTTCTTCTTCTTCT	CTTCTTCTTCTTCTTCTTCTTCTTCTTCTTCTTCTTCTTCTTCT/CTTCTTCTTCTTCTTCTTCTTCTTCTTCTTCTTCTTCTTCTTCTTCTTCTTCT	CTTCTTCTTCTTCTTCTTCTTCTTCTTCTTCTTCT/CTTCTTCTTCTTCTTCTTCTTCTTCTTCTTCTTCT	CTTCTTCTTCTTCTTCTTCTTCTTCTTCTTCTTCT/CTTCTTCTTCTTCTTCTTCTTCTTCTTCTTCTTCTTCTTCTTCTTCTTCTTCTTCTTCTTCT	CTTCTTCTTCTTCTTCTTCTTCTTCTTCTTCTTCTTCTTCTTCTTCTTCT/CTTCTTCTTCTTCTTCTTCTTCTTCTTCTTCTTCTTCTTCTTCTTCTTCTTCT	CTTCTTCTTCTTCTTCTTCTTCTTCTTCTTCT/CTTCTTCTTCTTCTTCTTCTTCTTCTTCTTCTTCTTCTTCTTCTTCTTCTTCTTCTTCTTCT	CTTCTTCTTCTTCTTCTTCTTCTTCTTCTTCTTCTTCTTCTTCTTCTTCT/CTTCTTCTTCTTCTTCTTCTTCTTCTTCTTCTTCTTCTTCTTCTTCTTCTTCT	CTTCTTCTTCTTCTTCTTCTTCTTCTTCTTCTTCTTCTTCTTCTTCT/CTTCTTCTTCTTCTTCTTCTTCTTCTTCTTCTTCTTCTTCTTCTTCTTCTTCT	CTTCTTCTTCTTCTTCTTCTTCTTCTTCTTCTTCTTCTTCTTCTTCTTCTTCT/CTTCTTCTTCTTCTTCTTCTTCTTCTTCTTCTTCTTCTTCTTCTTCTTCTTCTTCT	CTTCTTCTTCTTCTTCTTCTTCTTCTTCTTCTTCTTCTTCTTCTTCTTCTTCTTCTTCT/CTTCTTCTTCTTCTTCTTCTTCTTCTTCTTCTTCTTCTTCTTCTTCTTCTTCTTCTTCTTCT	CTTCTTCTTCTTCTTCTTCTTCTTCTTCTTCTTCTTCTTCTTCTTCT/CTTCTTCTTCTTCTTCTTCTTCTTCTTCTTCTTCTTCTTCTTCTTCTTCT	CTTCTTCTTCTTCTTCTTCTTCTTCTTCTTCTTCTTCTTCTTCTTCTTCTTCTTCTTCT/CTTCTTCTTCTTCTTCTTCTTCTTCTTCTTCTTCTTCTTCTTCTTCTTCTTCTTCTTCTTCT	CTTCTTCTTCTTCTTCTTCTTCTTCTTCTTCTTCTTCTTCTTCT/CTTCTTCTTCTTCTTCTTCTTCTTCTTCTTCTTCTTCTTCTTCTTCT	CTTCTTCTTCTTCTTCTTCTTCTTCTTCTTCTTCT/CTTCTTCTTCTTCTTCTTCTTCTTCTTCTTCTTCTTCTTCTTCTTCTTCTTCTTCTTCT	CTTCTTCTTCTTCTTCTTCTTCTTCTTCTTCTTCT/CTTCTTCTTCTTCTTCTTCTTCTTCTTCTTCTTCT	CTTCTTCTTCTTCTTCTTCTTCTTCTTCTTCTTCTTCTTCTTCT/CTTCTTCTTCTTCTTCTTCTTCTTCTTCTTCTTCTTCTTCTTCTTCT	CTTCTTCTTCTTCTTCTTCTTCTTCTTCTTCTTCT/CTTCTTCTTCTTCTTCTTCTTCTTCTTCTTCTTCTTCTTCTTCTTCTTCTTCT	CTTCTTCTTCTTCTTCTTCTTCTTCTTCTTCTTCTTCTTCTTCTTCTTCTTCTTCTTCTTCTTCTTCTTCTTCT/CTTCTTCTTCTTCTTCTTCTTCTTCTTCTTCTTCTTCTTCTTCTTCTTCTTCTTCTTCTTCTTCTTCTTCTTCT	CTTCTTCTTCTTCTTCTTCTTCTTCTTCTTCTTCTTCTTCTTCTTCTTCTTCTTCT/CTTCTTCTTCTTCTTCTTCTTCTTCTTCTTCTTCTTCTTCTTCTTCTTCTTCTTCTTCT	CTTCTTCTTCTTCTTCTTCTTCTTCTTCTTCTTCTTCTTCTTCTTCTTCT/CTTCTTCTTCTTCTTCTTCTTCTTCTTCTTCTTCTTCTTCTTCTTCTTCTTCT	CTTCTTCTTCTTCTTCTTCTTCTTCTTCTTCTTCTTCTTCTTCTTCT/CTTCTTCTTCTTCTTCTTCTTCTTCTTCTTCTTCTTCTTCTTCTTCTTCT	CTTCTTCTTCTTCTTCTTCTTCTTCTTCTTCT/CTTCTTCTTCTTCTTCTTCTTCTTCTTCTTCTTCT
Xunr55	3	3456860	ATGCCATTGCCATGCCATGCCGCGCCCTGCAGATCTCGCG	65.251	ATGACCAGACGGCGCTGCTGATGCGGTCCCGCGGAAGAAT	63.864	ACCGCACCGCACCGCACCGCACCGCAC	ACCGCACCGCACCGCACCGC;ACCGCACCGCACCGCACCGCACCGCA;ACCGCACCGCACCGCACCGCACCGCACCGC;ACCGCACCGCACCGCACCGCACCGCACCGCA;ACCGCACCGCACCGCACCGCACCGCACCGCACCGC;ACCGCACCGCACCGCACCGCACCGCACCGCACCGCA;ACCGCACCGCACCGCACCGCACCGCACCGCACCGCACCGC;ACCGCACCGCACCGCACCGCACCGCACCGCACCGCACCGCA;ACCGCACCGCACCGCACCGCACCGCACCGCACCGCACCGCACC;ACCGCACCGCACCGCACCGCACCGCACCGCACCGCACCGCACCGC;ACCGCACCGCACCGCACCGCACCGCACCGCACCGCACCGCAC…	ACCGCACCGCACCGCACCGCACCGCAC/ACCGCACCGCACCGCACCGCACCGCAC	ACCGCACCGCACCGCACCGCACCGCACCGCACCGC/ACCGCACCGCACCGCACCGCACCGCACCGCACCGC	ACCGCACCGCACCGCACCGCACCGCACCGCACCGCACCGCACCGC/ACCGCACCGCACCGCACCGCACCGCACCGCACCGCACCGCACCGC	ACCGCACCGCACCGCACCGCACCGCACCGCACCGCACCGCACC/ACCGCACCGCACCGCACCGCACCGCACCGCACCGCACCGCACCGC	ACCGCACCGCACCGCACCGCACCGCACCGC/ACCGCACCGCACCGCACCGCACCGCACCGC	ACCGCACCGCACCGCACCGCACCGCAC/ACCGCACCGCACCGCACCGCACCGCAC	ACCGCACCGCACCGCACCGCACCGCACCGCACCGCACCGCACCGC/ACCGCACCGCACCGCACCGCACCGCACCGCACCGCACCGCACCGC	./.	ACCGCACCGCACCGCACCGCACCGCACCGCACCGCACCGC/ACCGCACCGCACCGCACCGCACCGCACCGCACCGCACCGC	./.	./.	ACCGCACCGCACCGCACCGCACCGCACCGCACCGCACCGCACCGC/ACCGCACCGCACCGCACCGCACCGCACCGCACCGCACCGCACCGC	ACCGCACCGCACCGCACCGCACCGCACCGCACCGC/ACCGCACCGCACCGCACCGCACCGCACCGCACCGC	ACCGCACCGCACCGCACCGCACCGCACCGCACCGCACCGCACCGC/ACCGCACCGCACCGCACCGCACCGCACCGCACCGCACCGCACCGC	./.	ACCGCACCGCACCGCACCGCACCGCACCGCACCGCACCGCACCGC/ACCGCACCGCACCGCACCGCACCGCACCGCACCGCACCGCACCGC	./.	ACCGCACCGCACCGCACCGCACCGCACCGCACCGCACCGCACCGC/ACCGCACCGCACCGCACCGCACCGCACCGCACCGCACCGCACCGC	ACCGCACCGCACCGCACCGCACCGCACCGCACCGCACCGCACCGC/ACCGCACCGCACCGCACCGCACCGCACCGCACCGCACCGCACCGC	./.	ACCGCACCGCACCGCACCGCACCGCACCGCACCGC/ACCGCACCGCACCGCACCGCACCGCACCGCACCGC	./.	ACCGCACCGCACCGCACCGCACCGCACCGCACCGCACCGCACCGC/ACCGCACCGCACCGCACCGCACCGCACCGCACCGCACCGCACCGC	ACCGCACCGCACCGCACCGCACCGCACCGCACCGCACCGCA/ACCGCACCGCACCGCACCGCACCGCACCGCACCGCACCGCACCGCA	./.	ACCGCACCGCACCGCACCGCACCGCACCGCACCGCACCGC/ACCGCACCGCACCGCACCGCACCGCACCGCACCGCACCGC	./.	ACCGCACCGCACCGCACCGCACCGCAC/ACCGCACCGCACCGCACCGCACCGCAC	ACCGCACCGCACCGCACCGCACCGCACCGCACCGCACCGCACCGC/ACCGCACCGCACCGCACCGCACCGCACCGCACCGCACCGCACCGC	./.	ACCGCACCGCACCGCACCGCACCGCACCGCACCGCACCGCACCGC/ACCGCACCGCACCGCACCGCACCGCACCGCACCGCACCGCACCGC	ACCGCACCGCACCGCACCGCACCGCACCGCACCGC/ACCGCACCGCACCGCACCGCACCGCACCGCACCGC	ACCGCACCGCACCGCACCGCACCGCACCGCACCGCACCGCACCGC/ACCGCACCGCACCGCACCGCACCGCACCGCACCGCACCGCACCGC	./.	./.	ACCGCACCGCACCGCACCGCACCGCACCGCACCGCACCGCACCGC/ACCGCACCGCACCGCACCGCACCGCACCGCACCGCACCGCACCGC	ACCGCACCGCACCGCACCGCACCGCAC/ACCGCACCGCACCGCACCGCACCGCAC	ACCGCACCGCACCGCACCGCACCGCACCGCACCGCACCGCACCGCACCGC/ACCGCACCGCACCGCACCGCACCGCACCGCACCGCACCGCACCGCACCGC	./.	ACCGCACCGCACCGCACCGCACCGCACCGCACCGCACCGCACCGCA/ACCGCACCGCACCGCACCGCACCGCACCGCACCGCACCGCACCGCA	ACCGCACCGCACCGCACCGCACCGCACCGCACCGCACCGCACCGC/ACCGCACCGCACCGCACCGCACCGCACCGCACCGCACCGCACCGC
Xunr56	3	6498063	GAGAGAGAGAGAGAGAGGAGGGGGAGGCTGGCCGTACCTG	60.338	CAGTGCCGGCCGCAGATTCTCCCGTCGCTTCGCCGTCCTC	65.432	GGCGAGGGCGAGGGCGAGGGCGAGGGCG	GGCGAGGGCG;GGCGAGGGCGAGGGCG;GGCGAGGGCGAGGGCGAGGGCG;GGCGAGGGCGAGGGCGAGGGCGAGGGCGAGGGCGAGGGCG;GGCGAGGGCGAGGGCGAGGGCGAGGGCGAGGGCGAGGGCGAGGGCG;GGCGAGGGCGAGGGCGAGGGCGAGGGCGAGGGCGAGGGCGAGGGCGAGGGCG	GGCGAGGGCGAGGGCGAGGGCGAGGGCGAGGGCGAGGGCGAGGGCGAGGGCG/GGCGAGGGCGAGGGCGAGGGCGAGGGCGAGGGCGAGGGCGAGGGCGAGGGCG	GGCGAGGGCGAGGGCGAGGGCGAGGGCG/GGCGAGGGCGAGGGCGAGGGCGAGGGCG	GGCGAGGGCGAGGGCGAGGGCGAGGGCGAGGGCGAGGGCG/GGCGAGGGCGAGGGCGAGGGCGAGGGCGAGGGCGAGGGCG	GGCGAGGGCGAGGGCGAGGGCGAGGGCG/GGCGAGGGCGAGGGCGAGGGCGAGGGCG	GGCGAGGGCGAGGGCGAGGGCGAGGGCG/GGCGAGGGCGAGGGCGAGGGCGAGGGCG	GGCGAGGGCGAGGGCGAGGGCGAGGGCG/GGCGAGGGCGAGGGCGAGGGCGAGGGCG	GGCGAGGGCGAGGGCGAGGGCG/GGCGAGGGCGAGGGCGAGGGCG	GGCGAGGGCGAGGGCG/GGCGAGGGCGAGGGCG	GGCGAGGGCGAGGGCGAGGGCGAGGGCG/GGCGAGGGCGAGGGCGAGGGCGAGGGCG	GGCGAGGGCGAGGGCGAGGGCGAGGGCG/GGCGAGGGCGAGGGCGAGGGCGAGGGCG	GGCGAGGGCGAGGGCGAGGGCGAGGGCG/GGCGAGGGCGAGGGCGAGGGCGAGGGCG	GGCGAGGGCGAGGGCGAGGGCGAGGGCG/GGCGAGGGCGAGGGCGAGGGCGAGGGCG	GGCGAGGGCGAGGGCGAGGGCG/GGCGAGGGCGAGGGCGAGGGCG	GGCGAGGGCGAGGGCGAGGGCGAGGGCG/GGCGAGGGCGAGGGCGAGGGCGAGGGCG	GGCGAGGGCGAGGGCGAGGGCGAGGGCG/GGCGAGGGCGAGGGCGAGGGCGAGGGCG	GGCGAGGGCGAGGGCGAGGGCGAGGGCG/GGCGAGGGCGAGGGCGAGGGCGAGGGCG	GGCGAGGGCGAGGGCGAGGGCGAGGGCG/GGCGAGGGCGAGGGCGAGGGCGAGGGCG	GGCGAGGGCGAGGGCGAGGGCGAGGGCG/GGCGAGGGCGAGGGCGAGGGCGAGGGCG	GGCGAGGGCG/GGCGAGGGCG	GGCGAGGGCGAGGGCGAGGGCGAGGGCG/GGCGAGGGCGAGGGCGAGGGCGAGGGCG	GGCGAGGGCGAGGGCGAGGGCGAGGGCG/GGCGAGGGCGAGGGCGAGGGCGAGGGCG	GGCGAGGGCGAGGGCGAGGGCGAGGGCG/GGCGAGGGCGAGGGCGAGGGCGAGGGCG	GGCGAGGGCGAGGGCGAGGGCGAGGGCG/GGCGAGGGCGAGGGCGAGGGCGAGGGCG	GGCGAGGGCGAGGGCGAGGGCG/GGCGAGGGCGAGGGCGAGGGCGAGGGCG	GGCGAGGGCGAGGGCGAGGGCGAGGGCG/GGCGAGGGCGAGGGCGAGGGCGAGGGCG	GGCGAGGGCGAGGGCG/GGCGAGGGCGAGGGCG	GGCGAGGGCGAGGGCGAGGGCGAGGGCG/GGCGAGGGCGAGGGCGAGGGCGAGGGCG	GGCGAGGGCGAGGGCGAGGGCGAGGGCG/GGCGAGGGCGAGGGCGAGGGCGAGGGCG	GGCGAGGGCGAGGGCGAGGGCGAGGGCG/GGCGAGGGCGAGGGCGAGGGCGAGGGCG	GGCGAGGGCGAGGGCGAGGGCGAGGGCG/GGCGAGGGCGAGGGCGAGGGCGAGGGCG	GGCGAGGGCGAGGGCGAGGGCGAGGGCG/GGCGAGGGCGAGGGCGAGGGCGAGGGCG	GGCGAGGGCGAGGGCGAGGGCG/GGCGAGGGCGAGGGCGAGGGCG	GGCGAGGGCGAGGGCGAGGGCGAGGGCG/GGCGAGGGCGAGGGCGAGGGCGAGGGCG	GGCGAGGGCGAGGGCGAGGGCGAGGGCG/GGCGAGGGCGAGGGCGAGGGCGAGGGCG	GGCGAGGGCGAGGGCGAGGGCGAGGGCG/GGCGAGGGCGAGGGCGAGGGCGAGGGCG	GGCGAGGGCGAGGGCGAGGGCGAGGGCG/GGCGAGGGCGAGGGCGAGGGCGAGGGCG	GGCGAGGGCGAGGGCGAGGGCGAGGGCGAGGGCGAGGGCGAGGGCGAGGGCG/GGCGAGGGCGAGGGCGAGGGCGAGGGCGAGGGCGAGGGCGAGGGCGAGGGCG	GGCGAGGGCGAGGGCGAGGGCGAGGGCG/GGCGAGGGCGAGGGCGAGGGCGAGGGCG	GGCGAGGGCGAGGGCGAGGGCGAGGGCG/GGCGAGGGCGAGGGCGAGGGCGAGGGCG	GGCGAGGGCGAGGGCGAGGGCGAGGGCG/GGCGAGGGCGAGGGCGAGGGCGAGGGCG	GGCGAGGGCGAGGGCGAGGGCGAGGGCG/GGCGAGGGCGAGGGCGAGGGCGAGGGCG
Xunr57	3	7049909	GCACAATGTGGGGATCCTCCAACGATGAAGGTTGGCAAGC	59.1	TTCTGGTGTTGTCTGCTCTCCATGCCAACGCTCGGACCAA	60.163	CACACACACACACACAC	CACACACACAC;CACACACACACAC;CACACACACACACAC;CACACACACACACACACAC;CACACACACACACACACACAC;CACACACACACACACACACACACAC	CACACACACACACAC/CACACACACACACACAC	CACACACACACACACAC/CACACACACACACACACACACACAC	./.	./.	./.	./.	./.	./.	CACACACACACACAC/CACACACACACACACAC	CACACACACACACAC/CACACACACACACACAC	CACACACACACACAC/CACACACACACACACAC	CACACACACACACAC/CACACACACACACACAC	CACACACACACACACACACACACAC/CACACACACACACACACACACACAC	CACACACACACACAC/CACACACACACACACAC	CACACACACACACACAC/CACACACACACACACAC	CACACACACACACACACAC/CACACACACACACACACAC	CACACACACACACACAC/CACACACACACACACACAC	./.	CACACACACACACACACACACACAC/CACACACACACACACACACACACAC	./.	CACACACACACACACACAC/CACACACACACACACACACACACAC	./.	CACACACACACACACAC/CACACACACACACACAC	CACACACACACACACAC/CACACACACACACACACAC	CACACACACACACACAC/CACACACACACACACAC	./.	CACACACACACACAC/CACACACACACACACAC	./.	CACACACACACACACAC/CACACACACACACACAC	CACACACACACACACAC/CACACACACACACACACAC	./.	./.	./.	CACACACACACACAC/CACACACACACACACAC	CACACACACACACAC/CACACACACACACACAC	CACACACACACACACAC/CACACACACACACACACAC	CACACACACACACAC/CACACACACACACACAC	CACACACACACACAC/CACACACACACACACAC	CACACACACACACAC/CACACACACACACACAC	CACACACACACACACAC/CACACACACACACACAC	CACACACACACACACAC/CACACACACACACACACAC
Xunr58	3	11473463	CCGCGGCGAGGGACGTCGGCAGCGCCGCGCGGTGGAATGG	70.608	CGGGCGCTTCCCTCTGCTCCACTCCCGTCCCCGTGCCTGC	67.193	GCGGCGGCGGCGGCGGCGGCGGC	GCGGCGGC;GCGGCGGCGG;GCGGCGGCGGC;GCGGCGGCGGCGGCGGC;GCGGCGGCGGCGGCGGCGG;GCGGCGGCGGCGGCGGCGGC;GCGGCGGCGGCGGCGGCGGCGG;GCGGCGGCGGCGGCGGCGGCGGCGGC;GCGGCGGCGGCGGCGGCGGCGGCGGCGGCGGCGGCGGCGGCGGCGGCGG	GCGGCGGCGGCGGCGGC/GCGGCGGCGGCGGCGGCGGCGGCGGC	GCGGCGGCGGCGGCGGCGGC/GCGGCGGCGGCGGCGGCGGC	GCGGCGGCGGC/GCGGCGGCGGC	GCGGCGGCGGC/GCGGCGGCGGC	GCGGCGGCGGC/GCGGCGGCGGC	GCGGCGGCGGC/GCGGCGGCGGC	GCGGCGGCGGCGGCGGCGGCGGC/GCGGCGGCGGCGGCGGCGGCGGC	GCGGCGGCGGCGGCGGCGGCGGC/GCGGCGGCGGCGGCGGCGGCGGC	GCGGCGGCGGCGGCGGCGGCGGC/GCGGCGGCGGCGGCGGCGGCGGC	GCGGCGGCGGC/GCGGCGGCGGC	GCGGCGGCGGCGGCGGCGGCGGC/GCGGCGGCGGCGGCGGCGGCGGC	GCGGCGGCGGCGGCGGCGGCGGC/GCGGCGGCGGCGGCGGCGGCGGC	GCGGCGGCGGCGGCGGCGGCGGC/GCGGCGGCGGCGGCGGCGGCGGC	GCGGCGGC/GCGGCGGCGGCGGCGGCGGCGGC	GCGGCGGCGGC/GCGGCGGCGGCGGCGGCGGCGGC	GCGGCGGCGGCGGCGGCGGCGGCGGC/GCGGCGGCGGCGGCGGCGGCGGCGGC	GCGGCGGCGGC/GCGGCGGCGGC	GCGGCGGCGGC/GCGGCGGCGGC	GCGGCGGC/GCGGCGGCGGC	GCGGCGGCGGCGGCGGCGGCGGC/GCGGCGGCGGCGGCGGCGGCGGC	GCGGCGGCGGC/GCGGCGGCGGC	GCGGCGGCGGC/GCGGCGGCGGC	GCGGCGGCGGC/GCGGCGGCGGC	GCGGCGGCGGCGGCGGCGGC/GCGGCGGCGGCGGCGGCGGC	GCGGCGGCGGCGGCGGCGGCGG/GCGGCGGCGGCGGCGGCGGCGGC	GCGGCGGCGGCGGCGGCGGC/GCGGCGGCGGCGGCGGCGGC	GCGGCGGCGGCGGCGGCGGCGGCGGC/GCGGCGGCGGCGGCGGCGGCGGCGGC	GCGGCGGCGGCGGCGGCGGC/GCGGCGGCGGCGGCGGCGGC	GCGGCGGCGGCGGCGGCGGCGGC/GCGGCGGCGGCGGCGGCGGCGGC	GCGGCGGCGGCGGCGGCGGCGGC/GCGGCGGCGGCGGCGGCGGCGGC	GCGGCGGCGGC/GCGGCGGCGGC	GCGGCGGCGGCGGCGGCGGC/GCGGCGGCGGCGGCGGCGGCGGC	GCGGCGGCGGCGGCGGCGGCGGCGGC/GCGGCGGCGGCGGCGGCGGCGGCGGC	GCGGCGGCGGCGGCGGCGGCGGC/GCGGCGGCGGCGGCGGCGGCGGC	GCGGCGGCGGCGGCGGC/GCGGCGGCGGCGGCGGCGGC	GCGGCGGCGGC/GCGGCGGCGGC	GCGGCGGCGGCGGCGGCGGCGGC/GCGGCGGCGGCGGCGGCGGCGGCGGC	GCGGCGGCGGCGGCGGCGGC/GCGGCGGCGGCGGCGGCGGC	GCGGCGGCGGCGGCGGCGGCGGCGGC/GCGGCGGCGGCGGCGGCGGCGGCGGC	GCGGCGGCGGC/GCGGCGGCGGC	GCGGCGGCGGC/GCGGCGGCGGCGGCGGCGGCGGC
Xunr59	3	12537512	GACGACGACGACGCCCTCCAGCAGGCAGACGCCGGGATCG	66.139	CCTGGCCCTGATCACCCTCCATGACCTGGCCCTGATCACC	61.811	GAGGAGGAGGAGGAGGAGGAGG	GAGGAGGAGGAGGAGG;GAGGAGGAGGAGGAGGAGG;GAGGAGGAGGAGGAGGAGGAGGAGG;GAGGAGGAGGAGGAGGAGGAGGAGGAG;GAGGAGGAGGAGGAGGAGGAGGAGGAGG;GAGGAGGAGGAGGAGGAGGAGGAGGAGGAGG;GAGGAGGAGGAGGAGGAGGAGGAGGAGGAGGAGG;GAGGAGGAGGAGGAGGAGGAGGAGGAGGAGGAGGAGG;GAGGAGGAGGAGGAGGAGGAGGAGGAGGAGGAGGAGGAGG;GAGGAGGAGGAGGAGGAGGAGGAGGAGGAGGAGGAGGAGGAGG	GAGGAGGAGGAGGAGGAGGAGGAGGAGGAGGAGG/GAGGAGGAGGAGGAGGAGGAGGAGGAGGAGGAGG	GAGGAGGAGGAGGAGGAGGAGG/GAGGAGGAGGAGGAGGAGGAGG	GAGGAGGAGGAGGAGGAGGAGG/GAGGAGGAGGAGGAGGAGGAGG	GAGGAGGAGGAGGAGGAGG/GAGGAGGAGGAGGAGGAGGAGGAGGAGGAGGAGGAGG	./.	GAGGAGGAGGAGGAGGAGG/GAGGAGGAGGAGGAGGAGGAGG	GAGGAGGAGGAGGAGGAGGAGGAGGAGGAGG/GAGGAGGAGGAGGAGGAGGAGGAGGAGGAGGAGGAGG	GAGGAGGAGGAGGAGGAGGAGG/GAGGAGGAGGAGGAGGAGGAGG	GAGGAGGAGGAGGAGGAGGAGG/GAGGAGGAGGAGGAGGAGGAGG	GAGGAGGAGGAGGAGGAGG/GAGGAGGAGGAGGAGGAGGAGG	GAGGAGGAGGAGGAGGAGGAGG/GAGGAGGAGGAGGAGGAGGAGG	GAGGAGGAGGAGGAGGAGGAGG/GAGGAGGAGGAGGAGGAGGAGGAGGAGG	./.	GAGGAGGAGGAGGAGGAGGAGG/GAGGAGGAGGAGGAGGAGGAGGAGGAGGAGGAGGAGG	GAGGAGGAGGAGGAGGAGG/GAGGAGGAGGAGGAGGAGG	GAGGAGGAGGAGGAGGAGGAGG/GAGGAGGAGGAGGAGGAGGAGG	./.	./.	GAGGAGGAGGAGGAGGAGGAGG/GAGGAGGAGGAGGAGGAGGAGG	GAGGAGGAGGAGGAGGAGGAGG/GAGGAGGAGGAGGAGGAGGAGG	GAGGAGGAGGAGGAGGAGGAGG/GAGGAGGAGGAGGAGGAGGAGGAGGAGG	GAGGAGGAGGAGGAGGAGGAGG/GAGGAGGAGGAGGAGGAGGAGG	GAGGAGGAGGAGGAGGAGGAGG/GAGGAGGAGGAGGAGGAGGAGG	GAGGAGGAGGAGGAGGAGG/GAGGAGGAGGAGGAGGAGGAGGAGGAGGAGGAGGAGGAGG	GAGGAGGAGGAGGAGGAGGAGG/GAGGAGGAGGAGGAGGAGGAGG	GAGGAGGAGGAGGAGGAGGAGG/GAGGAGGAGGAGGAGGAGGAGG	GAGGAGGAGGAGGAGGAGGAGG/GAGGAGGAGGAGGAGGAGGAGG	GAGGAGGAGGAGGAGGAGGAGG/GAGGAGGAGGAGGAGGAGGAGG	GAGGAGGAGGAGGAGGAGGAGG/GAGGAGGAGGAGGAGGAGGAGG	GAGGAGGAGGAGGAGGAGGAGGAGGAGGAGG/GAGGAGGAGGAGGAGGAGGAGGAGGAGGAGGAGGAGG	GAGGAGGAGGAGGAGGAGGAGG/GAGGAGGAGGAGGAGGAGGAGG	./.	GAGGAGGAGGAGGAGGAGGAGG/GAGGAGGAGGAGGAGGAGGAGG	GAGGAGGAGGAGGAGGAGGAGG/GAGGAGGAGGAGGAGGAGGAGGAGG	GAGGAGGAGGAGGAGGAGGAGG/GAGGAGGAGGAGGAGGAGGAGG	GAGGAGGAGGAGGAGGAGGAGG/GAGGAGGAGGAGGAGGAGGAGG	./.	GAGGAGGAGGAGGAGGAGGAGG/GAGGAGGAGGAGGAGGAGGAGG	GAGGAGGAGGAGGAGGAGGAGG/GAGGAGGAGGAGGAGGAGGAGG	GAGGAGGAGGAGGAGGAGGAGG/GAGGAGGAGGAGGAGGAGGAGGAGGAGGAGGAGGAGGAGG	GAGGAGGAGGAGGAGGAGGAGG/GAGGAGGAGGAGGAGGAGGAGG
Xunr60	3	14962243	GGGGTGGAAGCCCGCGCTCGTGTTCCGCTTCGTGGAGACC	65.376	CCCGCTCGGCGGCCGCCGTGGCGGCGCGGAGCTCCTCCAG	72.267	GGGACTGGGACTGGGACTGGGAC	GGGACTGGGAC;GGGACTGGGACTGGGAC;GGGACTGGGACTGGGACTGGGA;GGGACTGGGACTGGGACTGGGACTGGGAC	./.	GGGACTGGGAC/GGGACTGGGAC	GGGACTGGGACTGGGACTGGGAC/GGGACTGGGACTGGGACTGGGAC	GGGACTGGGACTGGGACTGGGA/GGGACTGGGACTGGGACTGGGAC	GGGACTGGGACTGGGACTGGGAC/GGGACTGGGACTGGGACTGGGAC	GGGACTGGGACTGGGACTGGGAC/GGGACTGGGACTGGGACTGGGAC	GGGACTGGGACTGGGACTGGGAC/GGGACTGGGACTGGGACTGGGAC	GGGACTGGGACTGGGACTGGGAC/GGGACTGGGACTGGGACTGGGAC	GGGACTGGGACTGGGACTGGGAC/GGGACTGGGACTGGGACTGGGAC	./.	GGGACTGGGACTGGGACTGGGAC/GGGACTGGGACTGGGACTGGGAC	GGGACTGGGACTGGGACTGGGAC/GGGACTGGGACTGGGACTGGGAC	GGGACTGGGACTGGGACTGGGAC/GGGACTGGGACTGGGACTGGGAC	GGGACTGGGACTGGGACTGGGAC/GGGACTGGGACTGGGACTGGGAC	GGGACTGGGACTGGGACTGGGAC/GGGACTGGGACTGGGACTGGGAC	GGGACTGGGACTGGGACTGGGAC/GGGACTGGGACTGGGACTGGGAC	GGGACTGGGACTGGGACTGGGAC/GGGACTGGGACTGGGACTGGGAC	GGGACTGGGACTGGGACTGGGAC/GGGACTGGGACTGGGACTGGGAC	GGGACTGGGACTGGGACTGGGAC/GGGACTGGGACTGGGACTGGGAC	GGGACTGGGACTGGGACTGGGAC/GGGACTGGGACTGGGACTGGGAC	GGGACTGGGACTGGGACTGGGAC/GGGACTGGGACTGGGACTGGGAC	GGGACTGGGACTGGGACTGGGAC/GGGACTGGGACTGGGACTGGGAC	GGGACTGGGACTGGGACTGGGACTGGGAC/GGGACTGGGACTGGGACTGGGACTGGGAC	./.	GGGACTGGGACTGGGACTGGGAC/GGGACTGGGACTGGGACTGGGAC	GGGACTGGGACTGGGACTGGGAC/GGGACTGGGACTGGGACTGGGAC	GGGACTGGGACTGGGACTGGGAC/GGGACTGGGACTGGGACTGGGAC	GGGACTGGGACTGGGACTGGGAC/GGGACTGGGACTGGGACTGGGAC	GGGACTGGGACTGGGACTGGGAC/GGGACTGGGACTGGGACTGGGAC	GGGACTGGGACTGGGACTGGGAC/GGGACTGGGACTGGGACTGGGAC	GGGACTGGGACTGGGACTGGGAC/GGGACTGGGACTGGGACTGGGAC	./.	GGGACTGGGACTGGGACTGGGAC/GGGACTGGGACTGGGACTGGGAC	GGGACTGGGACTGGGACTGGGAC/GGGACTGGGACTGGGACTGGGAC	GGGACTGGGACTGGGACTGGGAC/GGGACTGGGACTGGGACTGGGAC	./.	./.	GGGACTGGGACTGGGACTGGGAC/GGGACTGGGACTGGGACTGGGAC	GGGACTGGGACTGGGACTGGGAC/GGGACTGGGACTGGGACTGGGAC	GGGACTGGGACTGGGACTGGGAC/GGGACTGGGACTGGGACTGGGACTGGGAC	GGGACTGGGACTGGGACTGGGAC/GGGACTGGGACTGGGACTGGGAC
Xunr61	3	16853093	TCGTCACTTCATGATATGAACGAATGCAGCTAAGACTTTC	52.588	AAACCCAGTAATGTTGATGCACGTGTTCACTTAGATATAG	51.118	TATATATATATATATATA	TATATATA;TATATATATATATATA	./.	./.	./.	./.	./.	./.	TATATATATATATATA/TATATATATATATATATA	./.	./.	./.	./.	./.	./.	./.	./.	./.	./.	./.	./.	./.	TATATATATATATATATA/TATATATATATATATATA	TATATATATATATATATA/TATATATATATATATATA	./.	./.	./.	TATATATATATATATA/TATATATATATATATATA	./.	./.	./.	TATATATATATATATATA/TATATATATATATATATA	./.	./.	./.	./.	./.	./.	./.	./.	./.	./.	./.
Xunr62	3	46961434	ACACCCCCCTTTCTCTTGGCGTTCTTTCTTGGAATCCTTC	56.71	GGCGTTGCTAGTTTCGCCGAATCAGTTAGGGTGTTAAAGC	56.99	TCTTTTCTTTTCTTTTCTTTTCTTTT	TCTTTTCTTTTCTTTTCTT;TCTTTTCTTTTCTTTTCTTTTCTT;TCTTTTCTTTTCTTTTCTTTTCTTT;TCTTTTCTTTTCTTTTCTTTTCTTTTCTT;TCTTTTCTTTTCTTTTCTTTTCTTTTCTTT;TCTTTTCTTTTCTTTTCTTTTCTTTTCTTTT;TCTTTTCTTTTCTTTTCTTTTCTTTTCTTTTCTTTT;TCTTTTCTTTTCTTTTCTTTTCTTTTCTTTTCTTTTCT;TCTTTTCTTTTCTTTTCTTTTCTTTTCTTTTCTTTTCTTTT;TCTTTTCTTTTCTTTTCTTTTCTTTTCTTTTCTTTTCTTTTC;TCTTTTCTTTTCTTTTCTTTTCTTTTCTTTTCTTTTCTTTTCT;TCTTTTCTTTTCTTTTCTTTTCTTTTCTTT…	TCTTTTCTTTTCTTTTCTTTTCTTTT/TCTTTTCTTTTCTTTTCTTTTCTTTT	TCTTTTCTTTTCTTTTCTTTTCTTTT/TCTTTTCTTTTCTTTTCTTTTCTTTT	TCTTTTCTTTTCTTTTCTTTTCTT/TCTTTTCTTTTCTTTTCTTTTCTT	TCTTTTCTTTTCTTTTCTTTTCTTTT/TCTTTTCTTTTCTTTTCTTTTCTTTT	TCTTTTCTTTTCTTTTCTTTTCTTTTCTTTTCTTTT/TCTTTTCTTTTCTTTTCTTTTCTTTTCTTTTCTTTT	TCTTTTCTTTTCTTTTCTTTTCTTTTCTTTTCTTTT/TCTTTTCTTTTCTTTTCTTTTCTTTTCTTTTCTTTT	TCTTTTCTTTTCTTTTCTTTTCTTTT/TCTTTTCTTTTCTTTTCTTTTCTTTT	TCTTTTCTTTTCTTTTCTTTTCTTTT/TCTTTTCTTTTCTTTTCTTTTCTTTT	TCTTTTCTTTTCTTTTCTTTTCTT/TCTTTTCTTTTCTTTTCTTTTCTT	TCTTTTCTTTTCTTTTCTTTTCTTTT/TCTTTTCTTTTCTTTTCTTTTCTTTT	TCTTTTCTTTTCTTTTCTTTTCTT/TCTTTTCTTTTCTTTTCTTTTCTT	TCTTTTCTTTTCTTTTCTTTTCTT/TCTTTTCTTTTCTTTTCTTTTCTT	TCTTTTCTTTTCTTTTCTTTTCTTTT/TCTTTTCTTTTCTTTTCTTTTCTTTT	TCTTTTCTTTTCTTTTCTTTTCTTTT/TCTTTTCTTTTCTTTTCTTTTCTTTT	TCTTTTCTTTTCTTTTCTTTTCTT/TCTTTTCTTTTCTTTTCTTTTCTT	TCTTTTCTTTTCTTTTCTTTTCTT/TCTTTTCTTTTCTTTTCTTTTCTT	TCTTTTCTTTTCTTTTCTTTTCTTTT/TCTTTTCTTTTCTTTTCTTTTCTTTT	TCTTTTCTTTTCTTTTCTTTTCTTTTCTTTTCTTTT/TCTTTTCTTTTCTTTTCTTTTCTTTTCTTTTCTTTT	TCTTTTCTTTTCTTTTCTTTTCTTTT/TCTTTTCTTTTCTTTTCTTTTCTTTT	TCTTTTCTTTTCTTTTCTTTTCTTTTCTTTTCTTTTCTTTT/TCTTTTCTTTTCTTTTCTTTTCTTTTCTTTTCTTTTCTTTT	TCTTTTCTTTTCTTTTCTTTTCTTTT/TCTTTTCTTTTCTTTTCTTTTCTTTT	TCTTTTCTTTTCTTTTCTTTTCTTTT/TCTTTTCTTTTCTTTTCTTTTCTTTT	TCTTTTCTTTTCTTTTCTTTTCTTTTCTTTTCTTTT/TCTTTTCTTTTCTTTTCTTTTCTTTTCTTTTCTTTT	TCTTTTCTTTTCTTTTCTTTTCTTTTCTTTTCTTTT/TCTTTTCTTTTCTTTTCTTTTCTTTTCTTTTCTTTT	TCTTTTCTTTTCTTTTCTTTTCTTTT/TCTTTTCTTTTCTTTTCTTTTCTTTT	TCTTTTCTTTTCTTTTCTTTTCTTTT/TCTTTTCTTTTCTTTTCTTTTCTTTT	TCTTTTCTTTTCTTTTCTTTTCTT/TCTTTTCTTTTCTTTTCTTTTCTTTT	TCTTTTCTTTTCTTTTCTTTTCTTTT/TCTTTTCTTTTCTTTTCTTTTCTTTT	TCTTTTCTTTTCTTTTCTTTTCTT/TCTTTTCTTTTCTTTTCTTTTCTT	TCTTTTCTTTTCTTTTCTTTTCTTTT/TCTTTTCTTTTCTTTTCTTTTCTTTT	TCTTTTCTTTTCTTTTCTTTTCTTTTCTTTTCTTTT/TCTTTTCTTTTCTTTTCTTTTCTTTTCTTTTCTTTT	TCTTTTCTTTTCTTTTCTTTTCTTTT/TCTTTTCTTTTCTTTTCTTTTCTTTT	TCTTTTCTTTTCTTTTCTTTTCTT/TCTTTTCTTTTCTTTTCTTTTCTT	TCTTTTCTTTTCTTTTCTTTTCTT/TCTTTTCTTTTCTTTTCTTTTCTT	TCTTTTCTTTTCTTTTCTT/TCTTTTCTTTTCTTTTCTTTTCTTTTCTTTTCTTTTCTTTT	TCTTTTCTTTTCTTTTCTTTTCTTTT/TCTTTTCTTTTCTTTTCTTTTCTTTT	TCTTTTCTTTTCTTTTCTTTTCTTTTCTTTT/TCTTTTCTTTTCTTTTCTTTTCTTTTCTTTT	TCTTTTCTTTTCTTTTCTTTTCTT/TCTTTTCTTTTCTTTTCTTTTCTT	TCTTTTCTTTTCTTTTCTTTTCTT/TCTTTTCTTTTCTTTTCTTTTCTT	TCTTTTCTTTTCTTTTCTT/TCTTTTCTTTTCTTTTCTTTTCTTTTCTTTTCTTTTCTTTT	TCTTTTCTTTTCTTTTCTTTTCTTTTCTTTTCTTTTCTTTT/TCTTTTCTTTTCTTTTCTTTTCTTTTCTTTTCTTTTCTTTT
Xunr63	3	50415852	CAGCCGCAGCAGTTGGCGGGAGGGGATTGGTGCTTCTTTG	62.617	CACCGCCGTCTGCTGCCTCGCCTGCGCCTTCTGGGTCTTC	65.538	GAGGAGGAGGAGGAGGAGGAAGAGGAG	GAGGAGGAGGAGGAGGAGGAAGAGGAG;GAGGAGGAGGAGGAGGAGGAA;GAGGAGGAGGAGGAGGAGGAAGAG;GAGGAGGAGGAGGAGGAGGAAGAGGAGGAG;GAGGAGGAGGAGGAGGAGGAAGAGGAGGAGGAG;GAGGAGGAGGAGGAGGAGGAAGAGGAGGAGGAGGAG;GAGGAGGAGGAGGAGGAGGAAGAGGAGGAGGAGGAGGAG;GAGGAGGAGGAGGAGGAGGAAGAGGAGGAGGAGGAGGAGGAG;GAGGAGGAGGAGGAGGAGGAAGAGGAGGAGGAGGAGGAGGAGGAG;GAGGAGGAGGAGGAGGAGGAAGAGGAGGAGGAGGAGGAGGAGGAGGAG	GAGGAGGAGGAGGAGGAGGAAGAG/GAGGAGGAGGAGGAGGAGGAAGAG	GAGGAGGAGGAGGAGGAGGAAGAGGAG/GAGGAGGAGGAGGAGGAGGAAGAGGAG	./.	./.	GAGGAGGAGGAGGAGGAGGAAGAGGAG/GAGGAGGAGGAGGAGGAGGAAGAGGAG	./.	GAGGAGGAGGAGGAGGAGGAAGAGGAG/GAGGAGGAGGAGGAGGAGGAAGAGGAG	GAGGAGGAGGAGGAGGAGGAAGAGGAGGAGGAGGAGGAGGAG/GAGGAGGAGGAGGAGGAGGAAGAGGAGGAGGAGGAGGAGGAG	./.	./.	./.	GAGGAGGAGGAGGAGGAGGAAGAGGAG/GAGGAGGAGGAGGAGGAGGAAGAGGAG	./.	GAGGAGGAGGAGGAGGAGGAAGAG/GAGGAGGAGGAGGAGGAGGAAGAGGAG	GAGGAGGAGGAGGAGGAGGAAGAGGAG/GAGGAGGAGGAGGAGGAGGAAGAGGAG	GAGGAGGAGGAGGAGGAGGAAGAG/GAGGAGGAGGAGGAGGAGGAAGAGGAG	GAGGAGGAGGAGGAGGAGGAAGAGGAG/GAGGAGGAGGAGGAGGAGGAAGAGGAGGAGGAG	GAGGAGGAGGAGGAGGAGGAAGAGGAG/GAGGAGGAGGAGGAGGAGGAAGAGGAG	./.	GAGGAGGAGGAGGAGGAGGAAGAG/GAGGAGGAGGAGGAGGAGGAAGAG	GAGGAGGAGGAGGAGGAGGAAGAGGAG/GAGGAGGAGGAGGAGGAGGAAGAGGAG	GAGGAGGAGGAGGAGGAGGAAGAGGAG/GAGGAGGAGGAGGAGGAGGAAGAGGAG	GAGGAGGAGGAGGAGGAGGAAGAGGAGGAGGAGGAGGAGGAGGAGGAG/GAGGAGGAGGAGGAGGAGGAAGAGGAGGAGGAGGAGGAGGAGGAGGAG	GAGGAGGAGGAGGAGGAGGAAGAGGAG/GAGGAGGAGGAGGAGGAGGAAGAGGAG	GAGGAGGAGGAGGAGGAGGAAGAGGAG/GAGGAGGAGGAGGAGGAGGAAGAGGAG	GAGGAGGAGGAGGAGGAGGAAGAGGAG/GAGGAGGAGGAGGAGGAGGAAGAGGAG	./.	GAGGAGGAGGAGGAGGAGGAAGAGGAG/GAGGAGGAGGAGGAGGAGGAAGAGGAG	GAGGAGGAGGAGGAGGAGGAAGAG/GAGGAGGAGGAGGAGGAGGAAGAG	GAGGAGGAGGAGGAGGAGGAAGAGGAG/GAGGAGGAGGAGGAGGAGGAAGAGGAG	GAGGAGGAGGAGGAGGAGGAAGAGGAG/GAGGAGGAGGAGGAGGAGGAAGAGGAG	GAGGAGGAGGAGGAGGAGGAAGAGGAGGAGGAGGAGGAG/GAGGAGGAGGAGGAGGAGGAAGAGGAGGAGGAGGAGGAGGAG	./.	./.	GAGGAGGAGGAGGAGGAGGAA/GAGGAGGAGGAGGAGGAGGAAGAG	GAGGAGGAGGAGGAGGAGGAAGAGGAG/GAGGAGGAGGAGGAGGAGGAAGAGGAG	GAGGAGGAGGAGGAGGAGGAAGAGGAGGAGGAGGAG/GAGGAGGAGGAGGAGGAGGAAGAGGAGGAGGAGGAGGAG	./.	GAGGAGGAGGAGGAGGAGGAA/GAGGAGGAGGAGGAGGAGGAAGAG	GAGGAGGAGGAGGAGGAGGAAGAG/GAGGAGGAGGAGGAGGAGGAAGAG	GAGGAGGAGGAGGAGGAGGAAGAGGAGGAG/GAGGAGGAGGAGGAGGAGGAAGAGGAGGAGGAG
Xunr64	3	51299520	TTGATTAAGGTGAAATTAAGTTAAAGTTAGTTATAATTTG	43.501	CCATGCATGCAAATGCATTGCGAATCATATACAGATACAG	52.771	ATATATATATATATATATATATATATATATATATATAT	ATATATATATATAT;ATATATATATATATAT;ATATATATATATATATATAT	./.	./.	./.	./.	./.	./.	./.	./.	./.	./.	./.	./.	./.	./.	./.	./.	ATATATATATATAT/ATATATATATATATAT	./.	./.	./.	./.	./.	./.	./.	./.	./.	./.	./.	./.	./.	./.	./.	./.	./.	./.	./.	./.	./.	./.	./.	ATATATATATATAT/ATATATATATATATAT
Xunr65	3	52422715	CCGTGCAGGGGCACACCCAGTGCATCTCCGAGGCCGTGAG	65.125	AATTGCAGAGATGAACAGTAAATTGCATAATACAGTGAGG	50.366	TCTCTCTCTCTCTCTCT	TCTCTCTCTCTCTCTCT;TCTCTCTCTCT;TCTCTCTCTCTCT;TCTCTCTCTCTCTCT;TCTCTCTCTCTCTCTCTCT;TCTCTCTCTCTCTCTCTCTCT;TCTCTCTCTCTCTCTCTCTCTCT;TCTCTCTCTCTCTCTCTCTCTCTCT;TCTCTCTCTCTCTCTCTCTCTCTCTCT;TCTCTCTCTCTCTCTCTCTCTCTCTCTCT;TCTCTCTCTCTCTCTCTCTCTCTCTCTCTCT;TCTCTCTCTCTCTCTCTCTCTCTCTCTCTCTCT;TCTCTCTCTCTCTCTCTCTCTCTCTCTCTCTCTCT;TCTCTCTCTCTCTCTCTCTCTCTCTCTCTCTCTCTCT;TCTCTCTCTCTCTCTCTCTCTCTCTCTCTCTCTCTCTCTCT	TCTCTCTCTCTCTCTCTCTCTCTCTCTCTCTCTCTCT/TCTCTCTCTCTCTCTCTCTCTCTCTCTCTCTCTCTCTCTCT	TCTCTCTCTCTCTCTCTCT/TCTCTCTCTCTCTCTCTCTCTCTCTCTCT	TCTCTCTCTCTCTCTCTCTCTCTCTCTCTCTCT/TCTCTCTCTCTCTCTCTCTCTCTCTCTCTCTCTCT	TCTCTCTCTCTCTCTCTCTCTCTCTCTCT/TCTCTCTCTCTCTCTCTCTCTCTCTCTCTCT	TCTCTCTCTCTCTCTCTCTCTCTCTCTCT/TCTCTCTCTCTCTCTCTCTCTCTCTCTCTCT	TCTCTCTCTCTCTCTCTCTCTCTCTCTCTCT/TCTCTCTCTCTCTCTCTCTCTCTCTCTCTCTCTCT	TCTCTCTCTCTCTCTCTCTCTCT/TCTCTCTCTCTCTCTCTCTCTCTCTCT	./.	TCTCTCTCTCTCTCTCTCTCTCTCTCT/TCTCTCTCTCTCTCTCTCTCTCTCTCTCT	TCTCTCTCTCTCTCTCTCTCTCTCTCTCTCT/TCTCTCTCTCTCTCTCTCTCTCTCTCTCTCTCTCT	TCTCTCTCTCTCTCTCT/TCTCTCTCTCTCTCTCTCTCTCTCTCTCTCT	TCTCTCTCTCTCTCTCTCTCTCT/TCTCTCTCTCTCTCTCTCTCTCTCTCTCTCTCTCTCT	TCTCTCTCTCTCTCTCTCTCTCTCTCTCT/TCTCTCTCTCTCTCTCTCTCTCTCTCTCTCT	TCTCTCTCTCTCTCTCT/TCTCTCTCTCTCTCTCTCTCTCTCTCTCTCT	TCTCTCTCTCTCTCTCTCTCTCTCTCTCT/TCTCTCTCTCTCTCTCTCTCTCTCTCTCTCTCTCT	TCTCTCTCTCTCTCTCTCTCTCTCTCTCTCTCT/TCTCTCTCTCTCTCTCTCTCTCTCTCTCTCTCTCT	TCTCTCTCTCTCTCTCTCTCTCT/TCTCTCTCTCTCTCTCTCTCTCTCTCTCT	TCTCTCTCTCTCTCTCTCTCTCTCTCTCT/TCTCTCTCTCTCTCTCTCTCTCTCTCTCTCT	TCTCTCTCTCTCTCTCTCTCTCTCTCTCTCTCTCT/TCTCTCTCTCTCTCTCTCTCTCTCTCTCTCTCTCTCT	TCTCTCTCTCTCTCTCTCTCTCTCTCT/TCTCTCTCTCTCTCTCTCTCTCTCTCTCTCTCT	TCTCTCTCTCTCTCTCTCT/TCTCTCTCTCTCTCTCTCTCTCTCTCTCTCTCTCT	TCTCTCTCTCTCTCT/TCTCTCTCTCTCTCTCT	TCTCTCTCTCTCTCTCTCTCTCTCTCTCTCT/TCTCTCTCTCTCTCTCTCTCTCTCTCTCTCT	TCTCTCTCTCTCTCTCT/TCTCTCTCTCTCTCTCTCTCTCTCTCTCTCT	TCTCTCTCTCTCTCT/TCTCTCTCTCTCTCTCT	TCTCTCTCTCTCTCT/TCTCTCTCTCTCTCTCT	TCTCTCTCTCTCTCTCTCTCTCTCTCTCTCT/TCTCTCTCTCTCTCTCTCTCTCTCTCTCTCTCTCTCT	TCTCTCTCTCTCTCTCTCT/TCTCTCTCTCTCTCTCTCTCTCTCTCTCTCTCT	TCTCTCTCTCTCTCTCTCTCTCTCTCTCT/TCTCTCTCTCTCTCTCTCTCTCTCTCTCTCT	TCTCTCTCTCTCTCT/TCTCTCTCTCTCTCTCT	TCTCTCTCTCTCTCTCTCTCTCTCTCTCTCTCTCT/TCTCTCTCTCTCTCTCTCTCTCTCTCTCTCTCTCTCT	TCTCTCTCTCTCTCTCT/TCTCTCTCTCTCTCTCTCTCTCTCTCT	TCTCTCTCTCTCTCTCTCTCTCTCTCTCTCT/TCTCTCTCTCTCTCTCTCTCTCTCTCTCTCTCTCTCT	TCTCTCTCTCTCTCTCTCTCTCTCTCTCTCT/TCTCTCTCTCTCTCTCTCTCTCTCTCTCTCTCTCT	TCTCTCTCTCTCTCTCT/TCTCTCTCTCTCTCTCTCTCTCTCTCT	TCTCTCTCTCTCTCTCTCT/TCTCTCTCTCTCTCTCTCTCTCTCTCTCTCT	TCTCTCTCTCTCTCTCTCTCTCTCT/TCTCTCTCTCTCTCTCTCTCTCTCTCT	TCTCTCTCTCTCTCTCT/TCTCTCTCTCTCTCTCT	TCTCTCTCTCTCTCTCTCTCTCTCTCTCTCT/TCTCTCTCTCTCTCTCTCTCTCTCTCTCTCTCT	TCTCTCTCTCTCTCTCT/TCTCTCTCTCTCTCTCTCTCTCTCTCTCTCTCT	TCTCTCTCTCTCTCTCT/TCTCTCTCTCTCTCTCTCTCTCTCTCT
Xunr66	3	53608222	TAAATTGATTTCAAGAGAAGATTGCAAAAAACAAGCACAC	49.694	TTTATCACTTATAGCAGTAGTGAACTACACCAACATCATC	49.304	TCTCTCTCTCTCTCTCTCTCTCTC	TCTCTCTCTCTCTC;TCTCTCTCTCTCTCTC;TCTCTCTCTCTCTCTCTC;TCTCTCTCTCTCTCTCTCTC;TCTCTCTCTCTCTCTCTCTCT;TCTCTCTCTCTCTCTCTCTCTC;TCTCTCTCTCTCTCTCTCTCTCTCTC;TCTCTCTCTCTCTCTCTCTCTCTCTCTC;TCTCTCTCTCTCTCTCTCTCTCTCTCTCTC;TCTCTCTCTCTCTCTCTCTCTCTCTCTCTCTC;TCTCTCTCTCTCTCTCTCTCTCTCTCTCTCTCT;TCTCTCTCTCTCTCTCTCTCTCTCTCTCTCTCTC;TCTCTCTCTCTCTCTCTCTCTCTCTCTCTCTCTCTC;TCTCTCTCTCTCTCTCTCTCTCTCTCTCTCTCTCTCTCTC;TCTCTCTCTCTCTCT…	TCTCTCTCTCTCTCTCTCTCTCTC/TCTCTCTCTCTCTCTCTCTCTCTCTC	TCTCTCTCTCTCTCTCTCTC/TCTCTCTCTCTCTCTCTCTCTC	TCTCTCTCTCTCTCTCTCTC/TCTCTCTCTCTCTCTCTCTCTC	TCTCTCTCTCTCTCTCTCTC/TCTCTCTCTCTCTCTCTCTCTC	TCTCTCTCTCTCTCTCTCTC/TCTCTCTCTCTCTCTCTCTCTC	TCTCTCTCTCTCTCTCTCTC/TCTCTCTCTCTCTCTCTCTCTC	TCTCTCTCTCTCTCTCTCTC/TCTCTCTCTCTCTCTCTCTCTC	TCTCTCTCTCTCTCTCTCTC/TCTCTCTCTCTCTCTCTCTCTC	TCTCTCTCTCTCTCTCTCTCT/TCTCTCTCTCTCTCTCTCTCT	TCTCTCTCTCTCTCTCTCTC/TCTCTCTCTCTCTCTCTCTCTC	TCTCTCTCTCTCTCTCTCTCTC/TCTCTCTCTCTCTCTCTCTCTCTC	TCTCTCTCTCTCTCTCTC/TCTCTCTCTCTCTCTCTCTC	TCTCTCTCTCTCTCTCTCTC/TCTCTCTCTCTCTCTCTCTCTC	TCTCTCTCTCTCTCTCTCTC/TCTCTCTCTCTCTCTCTCTCTC	TCTCTCTCTCTCTC/TCTCTCTCTCTCTCTCTC	TCTCTCTCTCTCTCTCTCTCTC/TCTCTCTCTCTCTCTCTCTCTCTC	TCTCTCTCTCTCTCTCTC/TCTCTCTCTCTCTCTCTC	TCTCTCTCTCTCTCTCTCTC/TCTCTCTCTCTCTCTCTCTCTC	TCTCTCTCTCTCTCTC/TCTCTCTCTCTCTCTCTC	TCTCTCTCTCTCTCTCTCTCTC/TCTCTCTCTCTCTCTCTCTCTCTCTCTCTCTCTCTCTCTCTC	TCTCTCTCTCTCTCTCTCTCTC/TCTCTCTCTCTCTCTCTCTCTCTC	TCTCTCTCTCTCTCTCTCTCTC/TCTCTCTCTCTCTCTCTCTCTCTC	TCTCTCTCTCTCTCTCTCTC/TCTCTCTCTCTCTCTCTCTCTC	TCTCTCTCTCTCTCTCTCTCTC/TCTCTCTCTCTCTCTCTCTCTCTC	TCTCTCTCTCTCTCTCTCTCTC/TCTCTCTCTCTCTCTCTCTCTCTC	TCTCTCTCTCTCTCTCTCTCTCTC/TCTCTCTCTCTCTCTCTCTCTCTCTC	TCTCTCTCTCTCTCTCTCTCTC/TCTCTCTCTCTCTCTCTCTCTCTC	TCTCTCTCTCTCTCTCTCTCTCTC/TCTCTCTCTCTCTCTCTCTCTCTCTC	TCTCTCTCTCTCTCTCTCTCT/TCTCTCTCTCTCTCTCTCTCT	TCTCTCTCTCTCTCTCTCTC/TCTCTCTCTCTCTCTCTCTCTC	TCTCTCTCTCTCTCTCTC/TCTCTCTCTCTCTCTCTCTC	TCTCTCTCTCTCTCTCTCTCTC/TCTCTCTCTCTCTCTCTCTCTCTC	TCTCTCTCTCTCTCTCTCTCTC/TCTCTCTCTCTCTCTCTCTCTCTC	TCTCTCTCTCTCTCTCTCTCTC/TCTCTCTCTCTCTCTCTCTCTCTCTC	TCTCTCTCTCTCTCTCTCTCTCTCTCTCTC/TCTCTCTCTCTCTCTCTCTCTCTCTCTCTCTC	TCTCTCTCTCTCTCTCTCTCTCTC/TCTCTCTCTCTCTCTCTCTCTCTC	TCTCTCTCTCTCTCTCTCTCTCTC/TCTCTCTCTCTCTCTCTCTCTCTCTCTCTCTC	TCTCTCTCTCTCTCTCTCTC/TCTCTCTCTCTCTCTCTCTCTC	TCTCTCTCTCTCTCTCTCTCTCTCTC/TCTCTCTCTCTCTCTCTCTCTCTCTCTC	TCTCTCTCTCTCTCTCTCTCTCTCTC/TCTCTCTCTCTCTCTCTCTCTCTCTCTC	TCTCTCTCTCTCTCTCTCTCTCTCTCTCTCTCTCTC/TCTCTCTCTCTCTCTCTCTCTCTCTCTCTCTCTCTCTCTCTCTC
Xunr67	3	55189242	ATCGGTGAAAAGACTGATTGTTCTTGTTTTCTACTGTTCG	51.818	CATATCACTTCATTAAGAGATAAGAGAATACACAAAGGAC	47.305	GTGTGTGTGTGTGTGTGTGTGT	GTGTGTGT;GTGTGTGTGT;GTGTGTGTGTGT;GTGTGTGTGTGTGT;GTGTGTGTGTGTGTGT;GTGTGTGTGTGTGTGTGT;GTGTGTGTGTGTGTGTGTGT;GTGTGTGTGTGTGTGTGTGTG;GTGTGTGTGTGTGTGTGTGTGTGT;GTGTGTGTGTGTGTGTGTGTGTGTGT;GTGTGTGTGTGTGTGTGTGTGTGTGTGT;GTGTGTGTGTGTGTGTGTGTGTGTGTGTGT;GTGTGTGTGTGTGTGTGTGTGTGTGTGTGTGT;GTGTGTGTGTGTGTGTGTGTGTGTGTGTGTGTGT;GTGTGTGTGTGTGTGTGTGTGTGTGTGTGTGTGTGT	GTGTGTGTGTGTGTGTGTGTGT/GTGTGTGTGTGTGTGTGTGTGTGT	GTGTGTGTGTGTGTGTGTGTGT/GTGTGTGTGTGTGTGTGTGTGTGT	GTGTGTGTGTGTGTGTGTGTGTGTGTGTGTGT/GTGTGTGTGTGTGTGTGTGTGTGTGTGTGTGTGT	GTGTGTGTGTGTGTGTGTGT/GTGTGTGTGTGTGTGTGTGTGT	GTGTGTGTGTGTGTGTGTGTGTGTGTGT/GTGTGTGTGTGTGTGTGTGTGTGTGTGTGT	GTGTGTGTGTGTGTGTGTGTGTGTGTGT/GTGTGTGTGTGTGTGTGTGTGTGTGTGTGT	GTGTGTGTGTGTGTGTGTGT/GTGTGTGTGTGTGTGTGTGTGT	GTGTGTGTGTGTGTGTGTGTGTGTGT/GTGTGTGTGTGTGTGTGTGTGTGTGTGT	GTGTGTGTGTGTGTGTGTGT/GTGTGTGTGTGTGTGTGTGTGT	GTGTGTGTGTGTGTGTGTGTGTGTGTGT/GTGTGTGTGTGTGTGTGTGTGTGTGTGTGT	GTGTGTGTGTGTGTGTGTGTGTGTGTGTGTGT/GTGTGTGTGTGTGTGTGTGTGTGTGTGTGTGTGT	GTGTGTGT/GTGTGTGTGTGTGTGTGTGTGT	GTGTGTGTGTGTGTGTGTGTGTGTGT/GTGTGTGTGTGTGTGTGTGTGTGTGTGT	GTGTGTGTGTGTGTGTGTGTG/GTGTGTGTGTGTGTGTGTGTGTGTGTGT	GTGTGTGTGT/GTGTGTGTGTGTGTGTGTGTGTGTGTGTGTGT	GTGTGTGTGTGTGTGTGTGT/GTGTGTGTGTGTGTGTGTGTGT	GTGTGTGTGTGTGT/GTGTGTGTGTGTGTGTGTGTGTGTGTGTGT	GTGTGTGTGTGTGTGTGTGTGTGTGTGT/GTGTGTGTGTGTGTGTGTGTGTGTGTGTGT	GTGTGTGTGTGTGTGTGTGT/GTGTGTGTGTGTGTGTGTGTGT	GTGTGTGTGTGTGTGTGTGTGTGTGTGT/GTGTGTGTGTGTGTGTGTGTGTGTGTGTGT	GTGTGTGTGT/GTGTGTGTGTGTGTGTGT	GTGTGTGTGTGTGTGTGTGT/GTGTGTGTGTGTGTGTGTGTGT	GTGTGTGTGTGTGTGTGTGTGTGTGTGTGTGTGT/GTGTGTGTGTGTGTGTGTGTGTGTGTGTGTGTGTGT	GTGTGTGTGT/GTGTGTGTGTGTGTGTGTGTGTGT	GTGTGTGTGTGTGTGTGTGT/GTGTGTGTGTGTGTGTGTGTGT	GTGTGTGTGTGTGTGTGTGT/GTGTGTGTGTGTGTGTGTGTGT	GTGTGTGTGTGTGTGTGTGTGTGTGTGT/GTGTGTGTGTGTGTGTGTGTGTGTGTGTGTGT	GTGTGTGTGTGTGTGTGTGT/GTGTGTGTGTGTGTGTGTGTGT	GTGTGTGTGTGTGT/GTGTGTGTGTGTGT	GTGTGTGTGTGTGTGTGTGTGTGTGTGT/GTGTGTGTGTGTGTGTGTGTGTGTGTGTGT	GTGTGTGTGTGTGTGTGTGTGTGTGTGT/GTGTGTGTGTGTGTGTGTGTGTGTGTGTGT	GTGTGTGTGTGTGTGTGTGTGTGTGTGT/GTGTGTGTGTGTGTGTGTGTGTGTGTGT	GTGTGTGTGT/GTGTGTGTGT	GTGTGTGTGTGTGTGTGTGT/GTGTGTGTGTGTGTGTGTGTGT	GTGTGTGTGTGTGTGTGTGTGTGTGTGT/GTGTGTGTGTGTGTGTGTGTGTGTGTGTGT	GTGTGTGTGTGTGTGTGTGT/GTGTGTGTGTGTGTGTGTGTGT	GTGTGTGTGTGT/GTGTGTGTGTGT	GTGTGTGTGTGTGTGTGTGTGTGTGTGTGT/GTGTGTGTGTGTGTGTGTGTGTGTGTGTGTGTGT	GTGTGTGTGT/GTGTGTGTGT	GTGTGTGTGT/GTGTGTGTGT	GTGTGTGTGTGTGTGT/GTGTGTGTGTGTGTGTGT
Xunr68	3	55883011	GCACGCAGAGCAGCGGCGGCGCAGCCACGCCGAGGGCAAG	70.017	TGGGGAGCTAGCCCCGGCCGCGCCAGGTGGTGCCCTGCAT	69.069	CCATGCCATGCCATGCCATGCCA	CCATGCCA;CCATGCCATG;CCATGCCATGCCA;CCATGCCATGCCATGC;CCATGCCATGCCATGCCA	CCATGCCATGCCATGCCATGCCA/CCATGCCATGCCATGCCATGCCA	CCATGCCATGCCA/CCATGCCATGCCA	CCATGCCATGCCA/CCATGCCATGCCA	CCATGCCATGCCATGCCATGCCA/CCATGCCATGCCATGCCATGCCA	CCATGCCATGCCATGCCATGCCA/CCATGCCATGCCATGCCATGCCA	CCATGCCATGCCATGCCATGCCA/CCATGCCATGCCATGCCATGCCA	CCATGCCATGCCATGCCATGCCA/CCATGCCATGCCATGCCATGCCA	CCATGCCATGCCATGCCATGCCA/CCATGCCATGCCATGCCATGCCA	CCATGCCATGCCATGCCA/CCATGCCATGCCATGCCA	CCATGCCATGCCATGCCATGCCA/CCATGCCATGCCATGCCATGCCA	CCATGCCATGCCATGCCATGCCA/CCATGCCATGCCATGCCATGCCA	CCATGCCATGCCATGCCATGCCA/CCATGCCATGCCATGCCATGCCA	CCATGCCATGCCATGCCATGCCA/CCATGCCATGCCATGCCATGCCA	CCATGCCATGCCATGCCATGCCA/CCATGCCATGCCATGCCATGCCA	CCATGCCATGCCATGCCATGCCA/CCATGCCATGCCATGCCATGCCA	CCATGCCATGCCATGCCATGCCA/CCATGCCATGCCATGCCATGCCA	CCATGCCATGCCATGCCATGCCA/CCATGCCATGCCATGCCATGCCA	CCATGCCATGCCATGCCATGCCA/CCATGCCATGCCATGCCATGCCA	./.	CCATGCCATGCCA/CCATGCCATGCCATGCCATGCCA	CCATGCCATGCCATGCCATGCCA/CCATGCCATGCCATGCCATGCCA	CCATGCCATGCCATGCCATGCCA/CCATGCCATGCCATGCCATGCCA	CCATGCCATGCCATGCCATGCCA/CCATGCCATGCCATGCCATGCCA	CCATGCCATGCCATGCCATGCCA/CCATGCCATGCCATGCCATGCCA	CCATGCCATGCCATGCCATGCCA/CCATGCCATGCCATGCCATGCCA	CCATGCCATGCCATGCCATGCCA/CCATGCCATGCCATGCCATGCCA	CCATGCCATGCCATGCCATGCCA/CCATGCCATGCCATGCCATGCCA	CCATGCCATGCCATGCCATGCCA/CCATGCCATGCCATGCCATGCCA	CCATGCCATGCCATGCCATGCCA/CCATGCCATGCCATGCCATGCCA	CCATGCCATGCCATGCCATGCCA/CCATGCCATGCCATGCCATGCCA	CCATGCCATGCCATGCCATGCCA/CCATGCCATGCCATGCCATGCCA	./.	CCATGCCATGCCATGCCATGCCA/CCATGCCATGCCATGCCATGCCA	CCATGCCATGCCATGCCATGCCA/CCATGCCATGCCATGCCATGCCA	CCATGCCATGCCATGCCATGCCA/CCATGCCATGCCATGCCATGCCA	CCATGCCATGCCATGCCATGCCA/CCATGCCATGCCATGCCATGCCA	CCATGCCATGCCA/CCATGCCATGCCA	CCATGCCATGCCATGCCATGCCA/CCATGCCATGCCATGCCATGCCA	CCATGCCATGCCATGCCATGCCA/CCATGCCATGCCATGCCATGCCA	CCATGCCATGCCATGCCATGCCA/CCATGCCATGCCATGCCATGCCA	CCATGCCATGCCATGCCATGCCA/CCATGCCATGCCATGCCATGCCA
Xunr69	3	57295064	TTCTTTCAGCGCTGCGGCGGGCGGCGCCGTGCAAGCCTAC	67.493	TCCAACTCTCCAATAATGCCCCACGCTGCCGATAGAACTC	57.68	GGCATCGGCATCGGCATCGGCATCGGCAT	GGCATCGGCAT;GGCATCGGCATCGGCAT;GGCATCGGCATCGGCATCGGCAT;GGCATCGGCATCGGCATCGGCATCGGCATC;GGCATCGGCATCGGCATCGGCATCGGCATCGG	./.	GGCATCGGCATCGGCATCGGCAT/GGCATCGGCATCGGCATCGGCAT	GGCATCGGCATCGGCATCGGCAT/GGCATCGGCATCGGCATCGGCAT	./.	GGCATCGGCATCGGCATCGGCAT/GGCATCGGCATCGGCATCGGCAT	GGCATCGGCATCGGCATCGGCAT/GGCATCGGCATCGGCATCGGCAT	GGCATCGGCATCGGCATCGGCATCGGCAT/GGCATCGGCATCGGCATCGGCATCGGCAT	GGCATCGGCATCGGCATCGGCAT/GGCATCGGCATCGGCATCGGCAT	GGCATCGGCATCGGCATCGGCAT/GGCATCGGCATCGGCATCGGCAT	./.	GGCATCGGCATCGGCATCGGCAT/GGCATCGGCATCGGCATCGGCAT	GGCATCGGCATCGGCATCGGCAT/GGCATCGGCATCGGCATCGGCAT	GGCATCGGCATCGGCATCGGCAT/GGCATCGGCATCGGCATCGGCAT	GGCATCGGCATCGGCAT/GGCATCGGCATCGGCATCGGCAT	GGCATCGGCATCGGCATCGGCAT/GGCATCGGCATCGGCATCGGCAT	GGCATCGGCATCGGCATCGGCAT/GGCATCGGCATCGGCATCGGCAT	GGCATCGGCATCGGCATCGGCAT/GGCATCGGCATCGGCATCGGCAT	GGCATCGGCATCGGCATCGGCAT/GGCATCGGCATCGGCATCGGCAT	GGCATCGGCATCGGCATCGGCAT/GGCATCGGCATCGGCATCGGCAT	GGCATCGGCATCGGCATCGGCAT/GGCATCGGCATCGGCATCGGCAT	GGCATCGGCATCGGCATCGGCATCGGCAT/GGCATCGGCATCGGCATCGGCATCGGCAT	GGCATCGGCATCGGCATCGGCATCGGCAT/GGCATCGGCATCGGCATCGGCATCGGCAT	GGCATCGGCAT/GGCATCGGCAT	GGCATCGGCATCGGCATCGGCATCGGCAT/GGCATCGGCATCGGCATCGGCATCGGCAT	GGCATCGGCATCGGCATCGGCATCGGCAT/GGCATCGGCATCGGCATCGGCATCGGCAT	GGCATCGGCATCGGCATCGGCAT/GGCATCGGCATCGGCATCGGCAT	GGCATCGGCATCGGCATCGGCAT/GGCATCGGCATCGGCATCGGCAT	GGCATCGGCATCGGCATCGGCAT/GGCATCGGCATCGGCATCGGCAT	GGCATCGGCATCGGCATCGGCAT/GGCATCGGCATCGGCATCGGCAT	GGCATCGGCATCGGCATCGGCAT/GGCATCGGCATCGGCATCGGCAT	GGCATCGGCATCGGCATCGGCAT/GGCATCGGCATCGGCATCGGCAT	GGCATCGGCATCGGCATCGGCAT/GGCATCGGCATCGGCATCGGCAT	./.	GGCATCGGCATCGGCATCGGCAT/GGCATCGGCATCGGCATCGGCAT	GGCATCGGCATCGGCATCGGCAT/GGCATCGGCATCGGCATCGGCAT	GGCATCGGCATCGGCATCGGCAT/GGCATCGGCATCGGCATCGGCAT	GGCATCGGCAT/GGCATCGGCAT	GGCATCGGCATCGGCATCGGCAT/GGCATCGGCATCGGCATCGGCAT	GGCATCGGCATCGGCATCGGCATCGGCAT/GGCATCGGCATCGGCATCGGCATCGGCAT	GGCATCGGCATCGGCATCGGCAT/GGCATCGGCATCGGCATCGGCAT	GGCATCGGCATCGGCATCGGCAT/GGCATCGGCATCGGCATCGGCAT
Xunr70	3	60405068	GCGGCCGGTTCTGCCGACAAGACGCCGGCACTGCCGGAAG	67.207	ATGCTGGTGGCGAAGTCGCCGCCAACACCGGCGCCGGACG	68.209	CGCCGCCGCCACCGCCACCGCCACCGCC	CGCCGCCGCCACCGCC;CGCCGCCGCCACCGCCACCGCC;CGCCGCCGCCACCGCCACCGCCACC;CGCCGCCGCCACCGCCACCGCCACCGCCGCC;CGCCGCCGCCACCGCCACCGCCACCGCCGCCGCC	CGCCGCCGCCACCGCCACCGCCACCGCC/CGCCGCCGCCACCGCCACCGCCACCGCCGCCGCC	CGCCGCCGCCACCGCCACCGCCACCGCCGCCGCC/CGCCGCCGCCACCGCCACCGCCACCGCCGCCGCC	CGCCGCCGCCACCGCCACCGCCACCGCCGCC/CGCCGCCGCCACCGCCACCGCCACCGCCGCCGCC	CGCCGCCGCCACCGCCACCGCCACCGCC/CGCCGCCGCCACCGCCACCGCCACCGCC	CGCCGCCGCCACCGCCACCGCCACCGCC/CGCCGCCGCCACCGCCACCGCCACCGCC	CGCCGCCGCCACCGCCACCGCCACCGCC/CGCCGCCGCCACCGCCACCGCCACCGCC	CGCCGCCGCCACCGCCACCGCCACCGCC/CGCCGCCGCCACCGCCACCGCCACCGCC	CGCCGCCGCCACCGCCACCGCCACCGCC/CGCCGCCGCCACCGCCACCGCCACCGCC	CGCCGCCGCCACCGCCACCGCCACCGCC/CGCCGCCGCCACCGCCACCGCCACCGCC	CGCCGCCGCCACCGCCACCGCCACCGCC/CGCCGCCGCCACCGCCACCGCCACCGCC	CGCCGCCGCCACCGCCACCGCCACCGCC/CGCCGCCGCCACCGCCACCGCCACCGCC	CGCCGCCGCCACCGCCACCGCCACCGCC/CGCCGCCGCCACCGCCACCGCCACCGCC	CGCCGCCGCCACCGCCACCGCCACCGCC/CGCCGCCGCCACCGCCACCGCCACCGCC	CGCCGCCGCCACCGCCACCGCCACCGCC/CGCCGCCGCCACCGCCACCGCCACCGCC	CGCCGCCGCCACCGCCACCGCCACCGCC/CGCCGCCGCCACCGCCACCGCCACCGCC	CGCCGCCGCCACCGCCACCGCCACCGCC/CGCCGCCGCCACCGCCACCGCCACCGCC	CGCCGCCGCCACCGCCACCGCCACCGCC/CGCCGCCGCCACCGCCACCGCCACCGCCGCCGCC	CGCCGCCGCCACCGCCACCGCCACCGCC/CGCCGCCGCCACCGCCACCGCCACCGCCGCCGCC	CGCCGCCGCCACCGCCACCGCCACCGCC/CGCCGCCGCCACCGCCACCGCCACCGCC	CGCCGCCGCCACCGCCACCGCCACCGCC/CGCCGCCGCCACCGCCACCGCCACCGCC	CGCCGCCGCCACCGCCACCGCC/CGCCGCCGCCACCGCCACCGCCACCGCCGCCGCC	CGCCGCCGCCACCGCCACCGCCACCGCC/CGCCGCCGCCACCGCCACCGCCACCGCC	CGCCGCCGCCACCGCCACCGCCACCGCCGCCGCC/CGCCGCCGCCACCGCCACCGCCACCGCCGCCGCC	CGCCGCCGCCACCGCCACCGCCACCGCCGCCGCC/CGCCGCCGCCACCGCCACCGCCACCGCCGCCGCC	CGCCGCCGCCACCGCCACCGCCACCGCC/CGCCGCCGCCACCGCCACCGCCACCGCC	CGCCGCCGCCACCGCCACCGCCACCGCC/CGCCGCCGCCACCGCCACCGCCACCGCC	CGCCGCCGCCACCGCCACCGCCACCGCC/CGCCGCCGCCACCGCCACCGCCACCGCC	CGCCGCCGCCACCGCCACCGCCACCGCC/CGCCGCCGCCACCGCCACCGCCACCGCC	CGCCGCCGCCACCGCCACCGCCACCGCC/CGCCGCCGCCACCGCCACCGCCACCGCC	CGCCGCCGCCACCGCCACCGCCACCGCCGCCGCC/CGCCGCCGCCACCGCCACCGCCACCGCCGCCGCC	CGCCGCCGCCACCGCCACCGCCACCGCC/CGCCGCCGCCACCGCCACCGCCACCGCC	CGCCGCCGCCACCGCCACCGCC/CGCCGCCGCCACCGCCACCGCC	CGCCGCCGCCACCGCCACCGCCACCGCC/CGCCGCCGCCACCGCCACCGCCACCGCC	CGCCGCCGCCACCGCCACCGCCACCGCC/CGCCGCCGCCACCGCCACCGCCACCGCC	CGCCGCCGCCACCGCCACCGCCACCGCC/CGCCGCCGCCACCGCCACCGCCACCGCCGCCGCC	CGCCGCCGCCACCGCCACCGCCACCGCC/CGCCGCCGCCACCGCCACCGCCACCGCC	CGCCGCCGCCACCGCC/CGCCGCCGCCACCGCC	CGCCGCCGCCACCGCCACCGCCACCGCC/CGCCGCCGCCACCGCCACCGCCACCGCC	CGCCGCCGCCACCGCCACCGCCACCGCC/CGCCGCCGCCACCGCCACCGCCACCGCCGCCGCC	CGCCGCCGCCACCGCCACCGCCACCGCC/CGCCGCCGCCACCGCCACCGCCACCGCC	CGCCGCCGCCACCGCCACCGCCACCGCC/CGCCGCCGCCACCGCCACCGCCACCGCC
Xunr71	3	61837903	TGGCGACTTGGCGTGTAGCCCACCTTCCCTTCCCCCGTTG	63.608	ACCAGATTGATCCCCCGATTCAACCTGGATTGGATTGCTC	56.561	CTCTCTCTCTCTCTCTCTCTCTCTC	CTCTCTCTCTCTCTC;CTCTCTCTCTCTCTCTC;CTCTCTCTCTCTCTCTCTC;CTCTCTCTCTCTCTCTCTCTC;CTCTCTCTCTCTCTCTCTCTCTC;CTCTCTCTCTCTCTCTCTCTCTCTCTC;CTCTCTCTCTCTCTCTCTCTCTCTCTCTC;CTCTCTCTCTCTCTCTCTCTCTCTCTCTCTC;CTCTCTCTCTCTCTCTCTCTCTCTCTCTCTCTCTC;CTCTCTCTCTCTCTCTCTCTCTCTCTCTCTCTCTCTC;CTCTCTCTCTCTCTCTCTCTCTCTCTCTCTCTCTCTCTC;CTCTCTCTCTCTCTCTCTCTCTCTCTCTCTCTCTCTCTCTC	CTCTCTCTCTCTCTCTCTC/CTCTCTCTCTCTCTCTCTCTC	CTCTCTCTCTCTCTCTCTCTCTCTCTCTCTC/CTCTCTCTCTCTCTCTCTCTCTCTCTCTCTCTCTCTCTC	CTCTCTCTCTCTCTCTCTC/CTCTCTCTCTCTCTCTCTCTC	CTCTCTCTCTCTCTCTC/CTCTCTCTCTCTCTCTCTC	CTCTCTCTCTCTCTCTC/CTCTCTCTCTCTCTCTCTC	CTCTCTCTCTCTCTCTC/CTCTCTCTCTCTCTCTCTC	CTCTCTCTCTCTCTCTCTCTCTCTC/CTCTCTCTCTCTCTCTCTCTCTCTCTC	CTCTCTCTCTCTCTCTCTC/CTCTCTCTCTCTCTCTCTC	CTCTCTCTCTCTCTCTCTC/CTCTCTCTCTCTCTCTCTCTC	CTCTCTCTCTCTCTCTCTCTC/CTCTCTCTCTCTCTCTCTCTCTCTCTCTCTCTCTCTCTC	CTCTCTCTCTCTCTCTC/CTCTCTCTCTCTCTCTCTCTC	CTCTCTCTCTCTCTCTCTC/CTCTCTCTCTCTCTCTCTCTC	CTCTCTCTCTCTCTC/CTCTCTCTCTCTCTCTC	CTCTCTCTCTCTCTCTCTCTC/CTCTCTCTCTCTCTCTCTCTCTC	CTCTCTCTCTCTCTCTCTCTC/CTCTCTCTCTCTCTCTCTCTCTC	CTCTCTCTCTCTCTCTCTCTCTC/CTCTCTCTCTCTCTCTCTCTCTCTC	CTCTCTCTCTCTCTCTCTCTCTC/CTCTCTCTCTCTCTCTCTCTCTCTC	CTCTCTCTCTCTCTCTCTC/CTCTCTCTCTCTCTCTCTCTC	CTCTCTCTCTCTCTCTCTCTCTCTC/CTCTCTCTCTCTCTCTCTCTCTCTCTC	CTCTCTCTCTCTCTCTCTCTCTCTC/CTCTCTCTCTCTCTCTCTCTCTCTCTCTCTCTCTCTCTCTC	CTCTCTCTCTCTCTCTCTCTCTCTC/CTCTCTCTCTCTCTCTCTCTCTCTCTC	CTCTCTCTCTCTCTCTCTCTCTCTC/CTCTCTCTCTCTCTCTCTCTCTCTCTC	CTCTCTCTCTCTCTCTCTCTC/CTCTCTCTCTCTCTCTCTCTC	CTCTCTCTCTCTCTCTCTCTCTCTC/CTCTCTCTCTCTCTCTCTCTCTCTCTC	CTCTCTCTCTCTCTCTCTCTCTC/CTCTCTCTCTCTCTCTCTCTCTCTC	CTCTCTCTCTCTCTCTCTC/CTCTCTCTCTCTCTCTCTCTC	CTCTCTCTCTCTCTCTCTCTC/CTCTCTCTCTCTCTCTCTCTC	CTCTCTCTCTCTCTCTCTCTCTCTC/CTCTCTCTCTCTCTCTCTCTCTCTCTC	CTCTCTCTCTCTCTCTCTCTCTCTCTCTCTCTCTC/CTCTCTCTCTCTCTCTCTCTCTCTCTCTCTCTCTCTC	CTCTCTCTCTCTCTCTCTC/CTCTCTCTCTCTCTCTCTCTC	CTCTCTCTCTCTCTCTCTCTCTCTC/CTCTCTCTCTCTCTCTCTCTCTCTCTC	CTCTCTCTCTCTCTCTCTC/CTCTCTCTCTCTCTCTCTCTCTC	CTCTCTCTCTCTCTCTCTC/CTCTCTCTCTCTCTCTCTCTC	CTCTCTCTCTCTCTCTCTC/CTCTCTCTCTCTCTCTCTCTC	CTCTCTCTCTCTCTCTCTCTC/CTCTCTCTCTCTCTCTCTCTCTC	CTCTCTCTCTCTCTCTCTCTCTCTCTC/CTCTCTCTCTCTCTCTCTCTCTCTCTCTC	CTCTCTCTCTCTCTCTCTCTCTC/CTCTCTCTCTCTCTCTCTCTCTCTC	CTCTCTCTCTCTCTCTCTC/CTCTCTCTCTCTCTCTCTCTC	CTCTCTCTCTCTCTCTCTC/CTCTCTCTCTCTCTCTCTCTC	CTCTCTCTCTCTCTCTCTCTCTCTCTCTC/CTCTCTCTCTCTCTCTCTCTCTCTCTCTCTC	CTCTCTCTCTCTCTCTCTCTCTC/CTCTCTCTCTCTCTCTCTCTCTCTC
Xunr72	3	66653483	TCGTCTCCAGGCTGGGGTGTGGTCGATGCCGAGCGGTGAG	64.253	TTCACTGTGCCCGCCCGGCGGAGCCCCAAATTATTAACCG	62.08	CGGTGCGGTGCGGTGCGGTGCGGTG	CGGTGCGGTG;CGGTGCGGTGCGGTG;CGGTGCGGTGCGGTGC;CGGTGCGGTGCGGTGCG;CGGTGCGGTGCGGTGCGGTG;CGGTGCGGTGCGGTGCGGTGC;CGGTGCGGTGCGGTGCGGTGCGGTGC	CGGTGCGGTGCGGTGCGGTGCGGTG/CGGTGCGGTGCGGTGCGGTGCGGTG	CGGTGCGGTGCGGTGCGGTGC/CGGTGCGGTGCGGTGCGGTGC	CGGTGCGGTGCGGTGCGGTGCGGTG/CGGTGCGGTGCGGTGCGGTGCGGTG	CGGTGCGGTGCGGTGCGGTGCGGTG/CGGTGCGGTGCGGTGCGGTGCGGTG	CGGTGCGGTGCGGTGCGGTGCGGTG/CGGTGCGGTGCGGTGCGGTGCGGTG	CGGTGCGGTGCGGTGCGGTGCGGTG/CGGTGCGGTGCGGTGCGGTGCGGTG	CGGTGCGGTGCGGTGCGGTGCGGTG/CGGTGCGGTGCGGTGCGGTGCGGTG	./.	CGGTGCGGTGCGGTGCGGTGCGGTG/CGGTGCGGTGCGGTGCGGTGCGGTG	CGGTGCGGTGCGGTGCGGTGCGGTG/CGGTGCGGTGCGGTGCGGTGCGGTG	CGGTGCGGTGCGGTGCGGTGCGGTG/CGGTGCGGTGCGGTGCGGTGCGGTG	CGGTGCGGTGCGGTGCGGTGCGGTG/CGGTGCGGTGCGGTGCGGTGCGGTG	CGGTGCGGTGCGGTGCGGTGCGGTG/CGGTGCGGTGCGGTGCGGTGCGGTG	CGGTGCGGTGCGGTGCGGTGCGGTG/CGGTGCGGTGCGGTGCGGTGCGGTG	CGGTGCGGTGCGGTGCGGTGCGGTG/CGGTGCGGTGCGGTGCGGTGCGGTG	CGGTGCGGTGCGGTGCGGTGCGGTG/CGGTGCGGTGCGGTGCGGTGCGGTG	CGGTGCGGTGCGGTGCGGTGCGGTG/CGGTGCGGTGCGGTGCGGTGCGGTG	CGGTGCGGTGCGGTGCGGTGC/CGGTGCGGTGCGGTGCGGTGC	CGGTGCGGTGCGGTGCGGTGCGGTG/CGGTGCGGTGCGGTGCGGTGCGGTG	CGGTGCGGTGCGGTGCGGTGC/CGGTGCGGTGCGGTGCGGTGC	CGGTGCGGTGCGGTGCGGTGCGGTG/CGGTGCGGTGCGGTGCGGTGCGGTG	CGGTGCGGTGCGGTGCGGTGCGGTG/CGGTGCGGTGCGGTGCGGTGCGGTG	CGGTGCGGTGCGGTGCGGTGCGGTG/CGGTGCGGTGCGGTGCGGTGCGGTG	CGGTGCGGTGCGGTGCGGTGCGGTG/CGGTGCGGTGCGGTGCGGTGCGGTG	CGGTGCGGTGCGGTGCGGTGCGGTG/CGGTGCGGTGCGGTGCGGTGCGGTG	CGGTGCGGTGCGGTGCGGTGCGGTG/CGGTGCGGTGCGGTGCGGTGCGGTG	CGGTGCGGTGCGGTGCGGTGCGGTG/CGGTGCGGTGCGGTGCGGTGCGGTG	CGGTGCGGTGCGGTGCGGTGCGGTG/CGGTGCGGTGCGGTGCGGTGCGGTG	CGGTGCGGTGCGGTGCGGTGCGGTG/CGGTGCGGTGCGGTGCGGTGCGGTG	CGGTGCGGTGCGGTGCGGTGCGGTG/CGGTGCGGTGCGGTGCGGTGCGGTG	CGGTGCGGTGCGGTGCGGTGC/CGGTGCGGTGCGGTGCGGTGC	CGGTGCGGTGCGGTGCGGTGC/CGGTGCGGTGCGGTGCGGTGC	CGGTGCGGTG/CGGTGCGGTG	CGGTGCGGTGCGGTGCGGTGCGGTG/CGGTGCGGTGCGGTGCGGTGCGGTG	CGGTGCGGTGCGGTGCGGTGC/CGGTGCGGTGCGGTGCGGTGC	CGGTGCGGTGCGGTGCGGTGCGGTG/CGGTGCGGTGCGGTGCGGTGCGGTG	./.	CGGTGCGGTGCGGTGCGGTGCGGTG/CGGTGCGGTGCGGTGCGGTGCGGTG	CGGTGCGGTGCGGTGCGGTGCGGTG/CGGTGCGGTGCGGTGCGGTGCGGTG	CGGTGCGGTG/CGGTGCGGTG	CGGTGCGGTGCGGTGCGGTGCGGTG/CGGTGCGGTGCGGTGCGGTGCGGTG
Xunr73	3	70646249	GAAACGAATGAGTGGTGTTCCAAGTGAGCTGAGCGAGGAT	57.016	CAAACGATTCCTTTCTTGCCCCACTTTCCCTCCAAAATTC	54.709	AGAAGAAGAAGAAGAAGAAGAAGAAG	AGAAGAAGAAG;AGAAGAAGAAGAAG;AGAAGAAGAAGAAGAAG;AGAAGAAGAAGAAGAAGAAG;AGAAGAAGAAGAAGAAGAAGAAG;AGAAGAAGAAGAAGAAGAAGAAGAAGAAG;AGAAGAAGAAGAAGAAGAAGAAGAAGAAGAAG;AGAAGAAGAAGAAGAAGAAGAAGAAGAAGAAGAAGAAGAAGAAG	AGAAGAAGAAGAAGAAGAAGAAGAAG/AGAAGAAGAAGAAGAAGAAGAAGAAGAAGAAG	AGAAGAAGAAGAAGAAGAAGAAG/AGAAGAAGAAGAAGAAGAAGAAG	AGAAGAAGAAGAAGAAGAAGAAGAAG/AGAAGAAGAAGAAGAAGAAGAAGAAGAAG	AGAAGAAGAAGAAGAAGAAGAAGAAG/AGAAGAAGAAGAAGAAGAAGAAGAAG	AGAAGAAGAAGAAGAAGAAGAAGAAG/AGAAGAAGAAGAAGAAGAAGAAGAAG	AGAAGAAGAAGAAGAAGAAGAAG/AGAAGAAGAAGAAGAAGAAGAAG	AGAAGAAGAAGAAGAAGAAGAAGAAG/AGAAGAAGAAGAAGAAGAAGAAGAAGAAG	AGAAGAAGAAGAAGAAGAAGAAG/AGAAGAAGAAGAAGAAGAAGAAG	AGAAGAAGAAGAAGAAGAAGAAGAAGAAG/AGAAGAAGAAGAAGAAGAAGAAGAAGAAG	AGAAGAAGAAGAAGAAGAAGAAGAAG/AGAAGAAGAAGAAGAAGAAGAAGAAG	AGAAGAAGAAGAAGAAGAAGAAGAAG/AGAAGAAGAAGAAGAAGAAGAAGAAG	AGAAGAAGAAGAAGAAGAAGAAGAAG/AGAAGAAGAAGAAGAAGAAGAAGAAGAAG	AGAAGAAGAAGAAGAAGAAGAAG/AGAAGAAGAAGAAGAAGAAGAAG	AGAAGAAGAAGAAGAAGAAGAAGAAG/AGAAGAAGAAGAAGAAGAAGAAGAAG	AGAAGAAGAAGAAG/AGAAGAAGAAGAAGAAGAAGAAGAAG	AGAAGAAGAAG/AGAAGAAGAAGAAGAAGAAGAAGAAGAAG	AGAAGAAGAAGAAGAAGAAGAAGAAG/AGAAGAAGAAGAAGAAGAAGAAGAAG	AGAAGAAGAAGAAGAAGAAGAAGAAG/AGAAGAAGAAGAAGAAGAAGAAGAAG	AGAAGAAGAAG/AGAAGAAGAAGAAGAAG	AGAAGAAGAAGAAGAAGAAGAAGAAG/AGAAGAAGAAGAAGAAGAAGAAGAAG	AGAAGAAGAAGAAGAAGAAGAAGAAG/AGAAGAAGAAGAAGAAGAAGAAGAAG	AGAAGAAGAAGAAGAAGAAGAAGAAG/AGAAGAAGAAGAAGAAGAAGAAGAAG	AGAAGAAGAAGAAGAAGAAGAAG/AGAAGAAGAAGAAGAAGAAGAAGAAGAAG	AGAAGAAGAAGAAGAAGAAGAAG/AGAAGAAGAAGAAGAAGAAGAAGAAGAAG	AGAAGAAGAAGAAGAAGAAGAAGAAG/AGAAGAAGAAGAAGAAGAAGAAGAAG	AGAAGAAGAAGAAGAAGAAGAAG/AGAAGAAGAAGAAGAAGAAGAAGAAG	AGAAGAAGAAGAAG/AGAAGAAGAAGAAG	AGAAGAAGAAGAAG/AGAAGAAGAAGAAGAAGAAGAAGAAG	AGAAGAAGAAGAAGAAGAAGAAGAAG/AGAAGAAGAAGAAGAAGAAGAAGAAGAAG	AGAAGAAGAAGAAGAAGAAGAAG/AGAAGAAGAAGAAGAAGAAGAAG	AGAAGAAGAAGAAGAAGAAGAAGAAG/AGAAGAAGAAGAAGAAGAAGAAGAAG	AGAAGAAGAAGAAGAAGAAGAAG/AGAAGAAGAAGAAGAAGAAGAAG	AGAAGAAGAAGAAGAAGAAGAAGAAG/AGAAGAAGAAGAAGAAGAAGAAGAAGAAG	AGAAGAAGAAGAAGAAGAAGAAGAAG/AGAAGAAGAAGAAGAAGAAGAAGAAG	AGAAGAAGAAGAAGAAGAAGAAGAAG/AGAAGAAGAAGAAGAAGAAGAAGAAG	AGAAGAAGAAGAAGAAGAAGAAGAAG/AGAAGAAGAAGAAGAAGAAGAAGAAGAAGAAG	AGAAGAAGAAGAAGAAGAAGAAGAAGAAGAAG/AGAAGAAGAAGAAGAAGAAGAAGAAGAAGAAG	AGAAGAAGAAGAAGAAGAAGAAGAAG/AGAAGAAGAAGAAGAAGAAGAAGAAGAAGAAG	AGAAGAAGAAGAAGAAGAAGAAGAAG/AGAAGAAGAAGAAGAAGAAGAAGAAGAAG	AGAAGAAGAAGAAGAAGAAGAAGAAG/AGAAGAAGAAGAAGAAGAAGAAGAAG	AGAAGAAGAAGAAGAAGAAGAAG/AGAAGAAGAAGAAGAAGAAGAAGAAGAAGAAGAAGAAGAAGAAG
Xunr74	3	70848976	TCGAGGAAAAGCGAGCGCCCAAAGCAGCAGCTAGCGTTCA	62.021	CCCTGCACACCATGCACGGCGCATGAGTGACTGTGGGGTG	63.621	GCAGGCAGGCAGGCAGGCAGGCA	GCAGGCAGGCA;GCAGGCAGGCAGGCA;GCAGGCAGGCAGGCAGGCA;GCAGGCAGGCAGGCAGGCAGGCAGGCA;GCAGGCAGGCAGGCAGGCAGGCAGGCAGGCAGGCAGGCAGGCAGGCAGGCAGGCAGGCAGG;GCAGGCAGGCAGGCAGGCAGGCAGGCAGGCAGGCAGGCAGGCAGGCAGGCAGGCAGGCAGGCA	GCAGGCAGGCAGGCAGGCAGGCA/GCAGGCAGGCAGGCAGGCAGGCA	GCAGGCAGGCAGGCAGGCAGGCA/GCAGGCAGGCAGGCAGGCAGGCA	GCAGGCAGGCAGGCAGGCAGGCA/GCAGGCAGGCAGGCAGGCAGGCA	GCAGGCAGGCAGGCAGGCAGGCA/GCAGGCAGGCAGGCAGGCAGGCA	GCAGGCAGGCAGGCAGGCAGGCA/GCAGGCAGGCAGGCAGGCAGGCA	GCAGGCAGGCAGGCAGGCAGGCA/GCAGGCAGGCAGGCAGGCAGGCA	GCAGGCAGGCAGGCAGGCAGGCA/GCAGGCAGGCAGGCAGGCAGGCA	GCAGGCAGGCA/GCAGGCAGGCA	GCAGGCAGGCAGGCAGGCAGGCA/GCAGGCAGGCAGGCAGGCAGGCA	GCAGGCAGGCAGGCAGGCAGGCA/GCAGGCAGGCAGGCAGGCAGGCA	GCAGGCAGGCAGGCAGGCAGGCA/GCAGGCAGGCAGGCAGGCAGGCA	GCAGGCAGGCAGGCAGGCAGGCA/GCAGGCAGGCAGGCAGGCAGGCA	GCAGGCAGGCA/GCAGGCAGGCA	GCAGGCAGGCAGGCAGGCAGGCA/GCAGGCAGGCAGGCAGGCAGGCA	GCAGGCAGGCAGGCAGGCAGGCA/GCAGGCAGGCAGGCAGGCAGGCA	GCAGGCAGGCAGGCAGGCAGGCA/GCAGGCAGGCAGGCAGGCAGGCA	GCAGGCAGGCAGGCAGGCAGGCA/GCAGGCAGGCAGGCAGGCAGGCA	GCAGGCAGGCAGGCAGGCAGGCA/GCAGGCAGGCAGGCAGGCAGGCA	GCAGGCAGGCAGGCAGGCAGGCA/GCAGGCAGGCAGGCAGGCAGGCA	GCAGGCAGGCAGGCAGGCAGGCA/GCAGGCAGGCAGGCAGGCAGGCA	GCAGGCAGGCAGGCAGGCAGGCA/GCAGGCAGGCAGGCAGGCAGGCA	GCAGGCAGGCAGGCAGGCAGGCA/GCAGGCAGGCAGGCAGGCAGGCA	GCAGGCAGGCAGGCAGGCAGGCA/GCAGGCAGGCAGGCAGGCAGGCA	GCAGGCAGGCAGGCAGGCAGGCA/GCAGGCAGGCAGGCAGGCAGGCA	GCAGGCAGGCAGGCAGGCAGGCA/GCAGGCAGGCAGGCAGGCAGGCA	GCAGGCAGGCAGGCAGGCAGGCA/GCAGGCAGGCAGGCAGGCAGGCA	GCAGGCAGGCAGGCAGGCAGGCA/GCAGGCAGGCAGGCAGGCAGGCA	GCAGGCAGGCAGGCAGGCAGGCA/GCAGGCAGGCAGGCAGGCAGGCA	GCAGGCAGGCAGGCAGGCAGGCA/GCAGGCAGGCAGGCAGGCAGGCA	GCAGGCAGGCAGGCAGGCAGGCA/GCAGGCAGGCAGGCAGGCAGGCA	GCAGGCAGGCAGGCAGGCAGGCA/GCAGGCAGGCAGGCAGGCAGGCA	GCAGGCAGGCA/GCAGGCAGGCAGGCAGGCAGGCA	GCAGGCAGGCAGGCAGGCAGGCA/GCAGGCAGGCAGGCAGGCAGGCA	GCAGGCAGGCAGGCAGGCAGGCA/GCAGGCAGGCAGGCAGGCAGGCA	GCAGGCAGGCAGGCAGGCAGGCA/GCAGGCAGGCAGGCAGGCAGGCA	GCAGGCAGGCAGGCAGGCAGGCA/GCAGGCAGGCAGGCAGGCAGGCA	GCAGGCAGGCAGGCAGGCAGGCAGGCA/GCAGGCAGGCAGGCAGGCAGGCAGGCA	GCAGGCAGGCAGGCAGGCAGGCA/GCAGGCAGGCAGGCAGGCAGGCA	GCAGGCAGGCAGGCAGGCAGGCA/GCAGGCAGGCAGGCAGGCAGGCA	GCAGGCAGGCAGGCAGGCAGGCA/GCAGGCAGGCAGGCAGGCAGGCA	GCAGGCAGGCAGGCAGGCAGGCA/GCAGGCAGGCAGGCAGGCAGGCA
Xunr75	3	71504132	CCATCAGGCACGCAGACGCAGGGGAGGAGGAAACCTAAAC	60.438	GATTAAACAAGCACACAGCAGTGGTGCAAGCTGCGCTAGG	58.544	ATATATATATATATTATAT	ATATATATATATA;ATATATATATATATT;ATATATATATATATTA;ATATATATATATATTAT;ATATATATATATATTATATTA;ATATATATATATATTATATTATATATATA;ATATATATATATATTATATTATATATATATATATATATATATATATATA	./.	ATATATATATATATTATAT/ATATATATATATATTATATTA	ATATATATATATATTATAT/ATATATATATATATTATAT	./.	./.	./.	ATATATATATATATTATAT/ATATATATATATATTATAT	./.	ATATATATATATATTATAT/ATATATATATATATTATAT	./.	ATATATATATATATTATAT/ATATATATATATATTATAT	ATATATATATATATTAT/ATATATATATATATTATAT	./.	ATATATATATATATTATAT/ATATATATATATATTATAT	./.	ATATATATATATATTAT/ATATATATATATATTATAT	./.	./.	ATATATATATATATT/ATATATATATATATTATAT	./.	./.	ATATATATATATATTATAT/ATATATATATATATTATAT	./.	ATATATATATATATTATAT/ATATATATATATATTATAT	ATATATATATATATTATAT/ATATATATATATATTATAT	ATATATATATATATTATAT/ATATATATATATATTATAT	./.	ATATATATATATATTATAT/ATATATATATATATTATAT	./.	ATATATATATATATTATAT/ATATATATATATATTATATTA	./.	ATATATATATATATTATATTA/ATATATATATATATTATATTA	ATATATATATATATTATAT/ATATATATATATATTATAT	ATATATATATATATT/ATATATATATATATTATAT	ATATATATATATATTATAT/ATATATATATATATTATAT	ATATATATATATATTATAT/ATATATATATATATTATAT	ATATATATATATATTATAT/ATATATATATATATTATAT	ATATATATATATATTATAT/ATATATATATATATTATAT	./.	./.	ATATATATATATATTATAT/ATATATATATATATTATAT
Xunr76	3	72557267	CCACCCCCTCCACCACCTACGGCCGCGCGAGACGCAAAAG	65.39	CCCCCTAACGCTGCCGCTGCCGGTGGGCGTGCGCGTGTCG	69.478	AGGAGGAGGAGGAGGAGGAGGAGGAGGAG	AGGAGGAGGAG;AGGAGGAGGAGGAG;AGGAGGAGGAGGAGGAG;AGGAGGAGGAGGAGGAGGAG;AGGAGGAGGAGGAGGAGGAGGA;AGGAGGAGGAGGAGGAGGAGGAG;AGGAGGAGGAGGAGGAGGAGGAGGAG;AGGAGGAGGAGGAGGAGGAGGAGGAGGAGGAG;AGGAGGAGGAGGAGGAGGAGGAGGAGGAGGAGGAG;AGGAGGAGGAGGAGGAGGAGGAGGAGGAGGAGGAGGAG;AGGAGGAGGAGGAGGAGGAGGAGGAGGAGGAGGAGGAGGAG	AGGAGGAGGAGGAGGAG/AGGAGGAGGAGGAGGAGGAG	AGGAGGAGGAGGAGGAGGAGGAGGAGGAG/AGGAGGAGGAGGAGGAGGAGGAGGAGGAG	AGGAGGAGGAGGAGGAGGAGGAGGAGGAG/AGGAGGAGGAGGAGGAGGAGGAGGAGGAGGAGGAGGAG	AGGAGGAGGAGGAGGAGGAGGAGGAGGAG/AGGAGGAGGAGGAGGAGGAGGAGGAGGAG	AGGAGGAGGAGGAGGAGGAGGAGGAGGAG/AGGAGGAGGAGGAGGAGGAGGAGGAGGAG	./.	AGGAGGAGGAGGAGGAGGAGGAGGAG/AGGAGGAGGAGGAGGAGGAGGAGGAGGAG	AGGAGGAGGAGGAGGAGGAGGAGGAGGAGGAG/AGGAGGAGGAGGAGGAGGAGGAGGAGGAGGAG	AGGAGGAGGAGGAGGAGGAGGAGGAGGAG/AGGAGGAGGAGGAGGAGGAGGAGGAGGAG	AGGAGGAGGAGGAGGAGGAGGAG/AGGAGGAGGAGGAGGAGGAGGAG	AGGAGGAGGAGGAGGAGGAGGAGGAGGAG/AGGAGGAGGAGGAGGAGGAGGAGGAGGAG	AGGAGGAGGAGGAGGAGGAGGAGGAGGAGGAGGAG/AGGAGGAGGAGGAGGAGGAGGAGGAGGAGGAGGAGGAG	AGGAGGAGGAGGAGGAGGAGGAG/AGGAGGAGGAGGAGGAGGAGGAG	AGGAGGAGGAGGAGGAGGAGGAGGAGGAG/AGGAGGAGGAGGAGGAGGAGGAGGAGGAG	AGGAGGAGGAGGAGGAGGAGGAGGAG/AGGAGGAGGAGGAGGAGGAGGAGGAG	AGGAGGAGGAGGAGGAGGAGGAGGAGGAG/AGGAGGAGGAGGAGGAGGAGGAGGAGGAG	AGGAGGAGGAGGAGGAGGAG/AGGAGGAGGAGGAGGAGGAG	AGGAGGAGGAGGAGGAGGAGGAGGAGGAGGAG/AGGAGGAGGAGGAGGAGGAGGAGGAGGAGGAGGAGGAG	AGGAGGAGGAGGAGGAGGAG/AGGAGGAGGAGGAGGAGGAG	AGGAGGAGGAGGAGGAGGAGGAGGAGGAG/AGGAGGAGGAGGAGGAGGAGGAGGAGGAG	AGGAGGAGGAGGAGGAGGAGGAGGAGGAG/AGGAGGAGGAGGAGGAGGAGGAGGAGGAG	AGGAGGAGGAGGAGGAGGAGGAGGAG/AGGAGGAGGAGGAGGAGGAGGAGGAGGAG	AGGAGGAGGAGGAGGAGGAGGAGGAG/AGGAGGAGGAGGAGGAGGAGGAGGAGGAG	AGGAGGAGGAGGAGGAGGAG/AGGAGGAGGAGGAGGAGGAG	AGGAGGAGGAGGAGGAGGAGGAGGAGGAG/AGGAGGAGGAGGAGGAGGAGGAGGAGGAG	AGGAGGAGGAGGAGGAGGAGGAGGAG/AGGAGGAGGAGGAGGAGGAGGAGGAGGAG	./.	AGGAGGAGGAGGAGGAGGAGGAGGAG/AGGAGGAGGAGGAGGAGGAGGAGGAGGAG	AGGAGGAGGAGGAGGAGGAGGAGGAG/AGGAGGAGGAGGAGGAGGAGGAGGAG	AGGAGGAGGAGGAGGAGGAGGAGGAG/AGGAGGAGGAGGAGGAGGAGGAGGAGGAG	./.	AGGAGGAGGAGGAGGAGGAGGAGGAGGAGGAG/AGGAGGAGGAGGAGGAGGAGGAGGAGGAGGAG	AGGAGGAGGAGGAGGAGGAGGAG/AGGAGGAGGAGGAGGAGGAGGAG	AGGAGGAGGAGGAGGAGGAGGAGGAGGAG/AGGAGGAGGAGGAGGAGGAGGAGGAGGAG	AGGAGGAGGAGGAGGAGGAGGAGGAGGAGGAGGAG/AGGAGGAGGAGGAGGAGGAGGAGGAGGAGGAGGAGGAG	AGGAGGAGGAGGAGGAGGAGGAGGAGGAGGAGGAG/AGGAGGAGGAGGAGGAGGAGGAGGAGGAGGAGGAGGAG	AGGAGGAGGAGGAGGAGGAG/AGGAGGAGGAGGAGGAGGAG	AGGAGGAGGAGGAGGAGGAGGAGGAG/AGGAGGAGGAGGAGGAGGAGGAGGAGGAG	AGGAGGAGGAGGAGGAGGAGGAGGAG/AGGAGGAGGAGGAGGAGGAGGAGGAGGAG	AGGAGGAGGAGGAGGAGGAGGAGGAG/AGGAGGAGGAGGAGGAGGAGGAGGAGGAG	AGGAGGAGGAGGAGGAGGAGGAGGAG/AGGAGGAGGAGGAGGAGGAGGAGGAGGAG
Xunr77	3	72618238	TGCACCTCAAGAAACTCGCCCGCCACCACGCACCAGGAAC	63.255	CAGGTTGGCGCTGGGCAGTTGGGAAGCTTGGAATAAGAAG	58.927	TCTTCTCTCTCTCTCT	TCTTCTCTCTCT;TCTTCTCTCTCTCT;TCTTCTCTCTCTCTCTTC;TCTTCTCTCTCTCTCTTCTC;TCTTCTCTCTCTCTCTTCTCTCTCTCTCTC;TCTTCTCTCTCTCTCTTCTCTCTCTCTCTCTC;TCTTCTCTCTCTCTCTTCTCTCTCTCTCTCTCTC;TCTTCTCTCTCTCTCTTCTCTCTCTCTCTCTCTCTC;TCTTCTCTCTCTCTCTTCTCTCTCTCTCTCTCTCTCTC;TCTTCTCTCTCTCTCTTCTCTCTCTCTCTCTCTCTCTCTC;TCTTCTCTCTCTCTCTTCTCTCTCTCTCTCTCTCTCTCTCTC;TCTTCTCTCTCTCTCTTCTCTCTCTCTCTCTCTCTCTCTCTCTC;TCTTCTCTCTCTCTCTTCTCTCTCTCT…	TCTTCTCTCTCTCTCT/TCTTCTCTCTCTCTCTTCTCTCTCTCTCTCTCTCTCTC	TCTTCTCTCTCTCTCT/TCTTCTCTCTCTCTCT	TCTTCTCTCTCTCTCT/TCTTCTCTCTCTCTCT	TCTTCTCTCTCTCTCT/TCTTCTCTCTCTCTCT	TCTTCTCTCTCTCTCT/TCTTCTCTCTCTCTCT	TCTTCTCTCTCTCTCTTCTCTCTCTCTCTCTCTCTC/TCTTCTCTCTCTCTCTTCTCTCTCTCTCTCTCTCTCTCTCTCTC	TCTTCTCTCTCTCTCT/TCTTCTCTCTCTCTCT	TCTTCTCTCTCTCTCTTC/TCTTCTCTCTCTCTCTTC	TCTTCTCTCTCTCTCTTC/TCTTCTCTCTCTCTCTTCTC	TCTTCTCTCTCTCTCTTCTCTCTCTCTCTCTCTCTCTCTCTC/TCTTCTCTCTCTCTCTTCTCTCTCTCTCTCTCTCTCTCTCTCTC	TCTTCTCTCTCTCTCTTC/TCTTCTCTCTCTCTCTTCTC	TCTTCTCTCTCTCTCT/TCTTCTCTCTCTCTCT	./.	TCTTCTCTCTCTCTCT/TCTTCTCTCTCTCTCT	TCTTCTCTCTCTCTCTTC/TCTTCTCTCTCTCTCTTCTC	TCTTCTCTCTCTCTCT/TCTTCTCTCTCTCTCTTCTC	TCTTCTCTCTCTCTCTTCTCTCTCTCTCTCTCTCTCTC/TCTTCTCTCTCTCTCTTCTCTCTCTCTCTCTCTCTCTC	TCTTCTCTCTCTCTCT/TCTTCTCTCTCTCTCTTCTCTCTCTCTCTCTCTCTCTCTC	TCTTCTCTCTCTCTCT/TCTTCTCTCTCTCTCT	TCTTCTCTCTCTCTCT/TCTTCTCTCTCTCTCT	TCTTCTCTCTCTCTCT/TCTTCTCTCTCTCTCTTCTCTCTCTCTCTCTCTCTCTCTCTCTCTCTC	TCTTCTCTCTCTCTCT/TCTTCTCTCTCTCTCT	TCTTCTCTCTCTCTCT/TCTTCTCTCTCTCTCT	TCTTCTCTCTCTCTCT/TCTTCTCTCTCTCTCTTCTCTCTCTCTCTCTCTCTC	TCTTCTCTCTCTCTCT/TCTTCTCTCTCTCTCT	TCTTCTCTCTCTCTCTTCTC/TCTTCTCTCTCTCTCTTCTC	TCTTCTCTCTCTCTCT/TCTTCTCTCTCTCTCT	TCTTCTCTCTCTCTCTTC/TCTTCTCTCTCTCTCTTCTC	TCTTCTCTCTCTCTCTTC/TCTTCTCTCTCTCTCTTCTC	TCTTCTCTCTCTCTCTTC/TCTTCTCTCTCTCTCTTCTC	TCTTCTCTCTCTCTCT/TCTTCTCTCTCTCTCTTCTCTCTCTCTCTCTCTCTCTCTCTCTC	TCTTCTCTCTCTCTCT/TCTTCTCTCTCTCTCTTC	TCTTCTCTCTCTCTCTTCTCTCTCTCTCTCTCTCTCTC/TCTTCTCTCTCTCTCTTCTCTCTCTCTCTCTCTCTCTCTCTC	TCTTCTCTCTCTCTCT/TCTTCTCTCTCTCTCT	TCTTCTCTCTCTCT/TCTTCTCTCTCTCTCTTCTCTCTCTCTCTCTCTCTCTCTCTC	TCTTCTCTCTCTCTCT/TCTTCTCTCTCTCTCT	TCTTCTCTCTCTCTCTTCTCTCTCTCTCTC/TCTTCTCTCTCTCTCTTCTCTCTCTCTCTCTCTCTC	TCTTCTCTCTCTCTCTTC/TCTTCTCTCTCTCTCTTCTC	TCTTCTCTCTCTCTCT/TCTTCTCTCTCTCTCTTCTC	TCTTCTCTCTCTCTCT/TCTTCTCTCTCTCTCT	TCTTCTCTCTCTCTCT/TCTTCTCTCTCTCTCT
Xunr78	3	73230724	CGGCGATCGGTCCGACATGGCCGGCGAGGAGGCGTCCGGC	68.629	GGACCCCAGCGGCCGCCCGCGCGGCTTCCTCGCCGTCACG	71.367	CCGGCGCCGGCGCCGGCGCGGGCGC	CCGGCGCCGGCGC	CCGGCGCCGGCGC/CCGGCGCCGGCGC	CCGGCGCCGGCGCCGGCGCGGGCGC/CCGGCGCCGGCGCCGGCGCGGGCGC	CCGGCGCCGGCGC/CCGGCGCCGGCGC	CCGGCGCCGGCGC/CCGGCGCCGGCGC	./.	./.	CCGGCGCCGGCGCCGGCGCGGGCGC/CCGGCGCCGGCGCCGGCGCGGGCGC	CCGGCGCCGGCGCCGGCGCGGGCGC/CCGGCGCCGGCGCCGGCGCGGGCGC	CCGGCGCCGGCGC/CCGGCGCCGGCGC	./.	CCGGCGCCGGCGC/CCGGCGCCGGCGC	CCGGCGCCGGCGC/CCGGCGCCGGCGC	CCGGCGCCGGCGCCGGCGCGGGCGC/CCGGCGCCGGCGCCGGCGCGGGCGC	CCGGCGCCGGCGC/CCGGCGCCGGCGC	CCGGCGCCGGCGC/CCGGCGCCGGCGC	CCGGCGCCGGCGC/CCGGCGCCGGCGC	CCGGCGCCGGCGC/CCGGCGCCGGCGC	CCGGCGCCGGCGC/CCGGCGCCGGCGC	./.	CCGGCGCCGGCGC/CCGGCGCCGGCGC	CCGGCGCCGGCGC/CCGGCGCCGGCGC	./.	./.	CCGGCGCCGGCGC/CCGGCGCCGGCGC	CCGGCGCCGGCGCCGGCGCGGGCGC/CCGGCGCCGGCGCCGGCGCGGGCGC	CCGGCGCCGGCGC/CCGGCGCCGGCGC	CCGGCGCCGGCGC/CCGGCGCCGGCGC	./.	CCGGCGCCGGCGC/CCGGCGCCGGCGC	CCGGCGCCGGCGC/CCGGCGCCGGCGC	CCGGCGCCGGCGC/CCGGCGCCGGCGC	./.	CCGGCGCCGGCGC/CCGGCGCCGGCGC	./.	CCGGCGCCGGCGC/CCGGCGCCGGCGC	CCGGCGCCGGCGC/CCGGCGCCGGCGC	CCGGCGCCGGCGC/CCGGCGCCGGCGC	CCGGCGCCGGCGC/CCGGCGCCGGCGC	CCGGCGCCGGCGC/CCGGCGCCGGCGC	CCGGCGCCGGCGCCGGCGCGGGCGC/CCGGCGCCGGCGCCGGCGCGGGCGC	CCGGCGCCGGCGCCGGCGCGGGCGC/CCGGCGCCGGCGCCGGCGCGGGCGC
Xunr79	4	2049113	GCCCTACATGTCATACCAAGTTTCCTTTACCTCACTAGAC	52.843	TGAAGAAGGGAGCAAGATTGAGGTGAGTGATAGAATGTTG	52.929	TCTCTCTCTCTCTCTCTCTCACACACACACACACACACACACA	TCTCTCTCTCTCTCTCTCTCACACACACACACACACACACACA;TCTCTCTCTCTCTCTCTCTCACA;TCTCTCTCTCTCTCTCTCTCACACACACACA;TCTCTCTCTCTCTCTCTCTCACACACACACACA;TCTCTCTCTCTCTCTCTCTCACACACACACACAC;TCTCTCTCTCTCTCTCTCTCACACACACACACACA;TCTCTCTCTCTCTCTCTCTCACACACACACACACACA;TCTCTCTCTCTCTCTCTCTCACACACACACACACACAC;TCTCTCTCTCTCTCTCTCTCACACACACACACACACACA;TCTCTCTCTCTCTCTCTCTCACACACACACACACACACAC;TCTCTCTCTCTCTCTCTCTCACACACACACACACAC…	TCTCTCTCTCTCTCTCTCTCACACACACACACACACACA/TCTCTCTCTCTCTCTCTCTCACACACACACACACACACA	TCTCTCTCTCTCTCTCTCTCACACACACACACACA/TCTCTCTCTCTCTCTCTCTCACACACACACACACACA	TCTCTCTCTCTCTCTCTCTCACACACACACACACACACACACACTCTCTCTCTCT/TCTCTCTCTCTCTCTCTCTCACACACACACACACACACACACACTCTCTCTCTCT	./.	TCTCTCTCTCTCTCTCTCTCACACACACACACACA/TCTCTCTCTCTCTCTCTCTCACACACACACACACACA	TCTCTCTCTCTCTCTCTCTCACACACACACACACACACA/TCTCTCTCTCTCTCTCTCTCACACACACACACACACACACA	TCTCTCTCTCTCTCTCTCTCACACACACACACACACACACACACTCTCTCTCTCTCT/TCTCTCTCTCTCTCTCTCTCACACACACACACACACACACACACTCTCTCTCTCTCT	TCTCTCTCTCTCTCTCTCTCACACACACACACACA/TCTCTCTCTCTCTCTCTCTCACACACACACACACACA	TCTCTCTCTCTCTCTCTCTCACACACACACACACACACA/TCTCTCTCTCTCTCTCTCTCACACACACACACACACACACA	TCTCTCTCTCTCTCTCTCTCACACACACACACACACACA/TCTCTCTCTCTCTCTCTCTCACACACACACACACACACACA	./.	TCTCTCTCTCTCTCTCTCTCACACACACACACACACACACACACTCTCTCTCTCTCT/TCTCTCTCTCTCTCTCTCTCACACACACACACACACACACACACTCTCTCTCTCTCTCT	TCTCTCTCTCTCTCTCTCTCACACACACACACACACA/TCTCTCTCTCTCTCTCTCTCACACACACACACACACACA	TCTCTCTCTCTCTCTCTCTCACACACACACACACA/TCTCTCTCTCTCTCTCTCTCACACACACACACACACACACACACTCTCTCTCTCT	TCTCTCTCTCTCTCTCTCTCACACACACACACACACACA/TCTCTCTCTCTCTCTCTCTCACACACACACACACACACACACA	TCTCTCTCTCTCTCTCTCTCACACACACACACACA/TCTCTCTCTCTCTCTCTCTCACACACACACACACA	TCTCTCTCTCTCTCTCTCTCACACACACACACACACACACACA/TCTCTCTCTCTCTCTCTCTCACACACACACACACACACACACACT	TCTCTCTCTCTCTCTCTCTCACACACACACACACACACACACA/TCTCTCTCTCTCTCTCTCTCACACACACACACACACACACACACT	TCTCTCTCTCTCTCTCTCTCACACACACACACACACACA/TCTCTCTCTCTCTCTCTCTCACACACACACACACACACACA	TCTCTCTCTCTCTCTCTCTCACACACACACACACA/TCTCTCTCTCTCTCTCTCTCACACACACACACACACA	TCTCTCTCTCTCTCTCTCTCACACACACACACACACACACACACTCTCTCTCTCTCTC/TCTCTCTCTCTCTCTCTCTCACACACACACACACACACACACACTCTCTCTCTCTCTC	./.	TCTCTCTCTCTCTCTCTCTCACACACACACACACACA/TCTCTCTCTCTCTCTCTCTCACACACACACACACACACACACACTCTCTCTCTCTCTCTCTCT	TCTCTCTCTCTCTCTCTCTCACACACACACACACACACA/TCTCTCTCTCTCTCTCTCTCACACACACACACACACACACACACTCTCTCTCTCTCT	TCTCTCTCTCTCTCTCTCTCACACACACACACACACACACA/TCTCTCTCTCTCTCTCTCTCACACACACACACACACACACACA	TCTCTCTCTCTCTCTCTCTCACACACACACACACACACACACACTCTCTCTCTCTCTCTCTCT/TCTCTCTCTCTCTCTCTCTCACACACACACACACACACACACACTCTCTCTCTCTCTCTCTCT	./.	TCTCTCTCTCTCTCTCTCTCACACACACACACACACACACACACTCTCTCTCTCTCT/TCTCTCTCTCTCTCTCTCTCACACACACACACACACACACACACTCTCTCTCTCTCT	TCTCTCTCTCTCTCTCTCTCACACACACACACACACACACA/TCTCTCTCTCTCTCTCTCTCACACACACACACACACACACACACTCTCTCTCTCTCTCTCT	TCTCTCTCTCTCTCTCTCTCACACACACACACACACACACACACTCTCTCTCTCT/TCTCTCTCTCTCTCTCTCTCACACACACACACACACACACACACTCTCTCTCTCTCT	TCTCTCTCTCTCTCTCTCTCACACACACACACACACACA/TCTCTCTCTCTCTCTCTCTCACACACACACACACACACACA	TCTCTCTCTCTCTCTCTCTCACACACACACACACACACA/TCTCTCTCTCTCTCTCTCTCACACACACACACACACACACA	TCTCTCTCTCTCTCTCTCTCACACACACACACACACACACACACTCTCTCTCTCTCTCTCTCT/TCTCTCTCTCTCTCTCTCTCACACACACACACACACACACACACTCTCTCTCTCTCTCTCTCT	TCTCTCTCTCTCTCTCTCTCACACACACACACACACACACACACTCTCTCTCTCTCTCTCTCT/TCTCTCTCTCTCTCTCTCTCACACACACACACACACACACACACTCTCTCTCTCTCTCTCTCT	TCTCTCTCTCTCTCTCTCTCACACACACACACACACACACA/TCTCTCTCTCTCTCTCTCTCACACACACACACACACACACACACTCT	TCTCTCTCTCTCTCTCTCTCACACACACACACACACACACA/TCTCTCTCTCTCTCTCTCTCACACACACACACACACACACACACTCTCTCTCTCT	./.	TCTCTCTCTCTCTCTCTCTCACACACACACACACACACACACACTCTCTCTCTCT/TCTCTCTCTCTCTCTCTCTCACACACACACACACACACACACACTCTCTCTCTCTCT	./.	TCTCTCTCTCTCTCTCTCTCACACACACACACACACACACACACT/TCTCTCTCTCTCTCTCTCTCACACACACACACACACACACACACTCTCTCTCTCT	TCTCTCTCTCTCTCTCTCTCACACACACACACACA/TCTCTCTCTCTCTCTCTCTCACACACACACACACA
Xunr80	4	2499499	TAACTGTCCAAACAGGATAAAAATTTTGGTCTTCTTGGTG	50.562	TTATATAATAAACTAGATTTTGATTGTCTTTATGAAATAG	41.498	ATATATATATATATATATATATATAT	ATATATAT;ATATATATAT;ATATATATATAT;ATATATATATATAT;ATATATATATATATAT;ATATATATATATATATAT;ATATATATATATATATATAT;ATATATATATATATATATATAT;ATATATATATATATATATATATAT	ATATATATATATATATATAT/ATATATATATATATATATAT	./.	./.	./.	./.	ATATATATATATATATATATAT/ATATATATATATATATATATAT	./.	./.	ATATATATATATATATATAT/ATATATATATATATATATAT	./.	./.	ATATATATATATATAT/ATATATATATATATATAT	ATATATATATAT/ATATATATATATAT	./.	ATATATATATATATATATAT/ATATATATATATATATATAT	./.	./.	./.	./.	./.	./.	./.	./.	./.	./.	./.	./.	./.	ATATATATATATATATATAT/ATATATATATATATATATAT	./.	./.	./.	./.	./.	./.	./.	ATATATATATATATATATAT/ATATATATATATATATATAT	./.	./.	./.	./.
Xunr81	4	3626855	GGCTCCCATGACGTGCGCGCGCGCCGAGGACGCCATCTCG	68.256	GTCCCACTCACACTGGGGCAGCCGCCACATCGTCGTCGTC	64.067	CGCCGCCGCCGCCGCCGCCGCCGCCGCCGCCGC	CGCCGCCGCCGCCGC;CGCCGCCGCCGCCGCCG;CGCCGCCGCCGCCGCCGC;CGCCGCCGCCGCCGCCGCCGC;CGCCGCCGCCGCCGCCGCCGCCG;CGCCGCCGCCGCCGCCGCCGCCGC;CGCCGCCGCCGCCGCCGCCGCCGCCGC;CGCCGCCGCCGCCGCCGCCGCCGCCGCCG;CGCCGCCGCCGCCGCCGCCGCCGCCGCCGC	CGCCGCCGCCGCCGCCGCCGCCGC/CGCCGCCGCCGCCGCCGCCGCCGC	CGCCGCCGCCGCCGCCGCCGCCGCCGCCGC/CGCCGCCGCCGCCGCCGCCGCCGCCGCCGCCGC	CGCCGCCGCCGCCGCCGC/CGCCGCCGCCGCCGCCGCCGC	CGCCGCCGCCGCCGCCGCCGCCGCCGCCGCCGC/CGCCGCCGCCGCCGCCGCCGCCGCCGCCGCCGC	./.	CGCCGCCGCCGCCGCCGC/CGCCGCCGCCGCCGCCGCCGCCGCCGCCG	./.	CGCCGCCGCCGCCGCCGC/CGCCGCCGCCGCCGCCGC	./.	./.	CGCCGCCGCCGCCGCCGCCGC/CGCCGCCGCCGCCGCCGCCGC	CGCCGCCGCCGCCGCCGC/CGCCGCCGCCGCCGCCGC	CGCCGCCGCCGCCGCCGC/CGCCGCCGCCGCCGCCGC	CGCCGCCGCCGCCGCCGCCGCCGCCGC/CGCCGCCGCCGCCGCCGCCGCCGCCGCCGCCGC	CGCCGCCGCCGCCGCCGCCGCCGC/CGCCGCCGCCGCCGCCGCCGCCGC	./.	CGCCGCCGCCGCCGCCGCCGCCGC/CGCCGCCGCCGCCGCCGCCGCCGC	./.	CGCCGCCGCCGCCGCCGCCGCCGC/CGCCGCCGCCGCCGCCGCCGCCGC	./.	CGCCGCCGCCGCCGCCGCCGCCGCCGCCGCCGC/CGCCGCCGCCGCCGCCGCCGCCGCCGCCGCCGC	CGCCGCCGCCGCCGCCGCCGCCGCCGCCGCCGC/CGCCGCCGCCGCCGCCGCCGCCGCCGCCGCCGC	./.	CGCCGCCGCCGCCGCCGC/CGCCGCCGCCGCCGCCGCCGC	./.	CGCCGCCGCCGCCGCCGCCGCCGC/CGCCGCCGCCGCCGCCGCCGCCGC	./.	CGCCGCCGCCGCCGCCGCCGCCGCCGCCGCCGC/CGCCGCCGCCGCCGCCGCCGCCGCCGCCGCCGC	CGCCGCCGCCGCCGCCGC/CGCCGCCGCCGCCGCCGC	./.	CGCCGCCGCCGCCGCCGCCGCCGC/CGCCGCCGCCGCCGCCGCCGCCGC	./.	CGCCGCCGCCGCCGCCGCCGCCGCCGCCGCCGC/CGCCGCCGCCGCCGCCGCCGCCGCCGCCGCCGC	./.	CGCCGCCGCCGCCGCCGCCGCCGC/CGCCGCCGCCGCCGCCGCCGCCGC	CGCCGCCGCCGCCGCCGCCGC/CGCCGCCGCCGCCGCCGCCGC	./.	CGCCGCCGCCGCCGCCGCCGCCGCCGCCGCCGC/CGCCGCCGCCGCCGCCGCCGCCGCCGCCGCCGC	CGCCGCCGCCGCCGCCGCCGCCGCCGCCGCCGC/CGCCGCCGCCGCCGCCGCCGCCGCCGCCGCCGC	./.	CGCCGCCGCCGCCGCCGCCGCCGCCGCCGCCGC/CGCCGCCGCCGCCGCCGCCGCCGCCGCCGCCGC
Xunr82	4	3832552	TTCACATTATCACAAAGAGTATTACCGAATCTTGGCAGTG	51.261	TCTCCATAGAAATTGATAATTTTAATTTTTCTTTTTTTGG	44.356	GAGAGAGAGAGAGAGA	GAGAGAGAGAGAGAGA;GAGAGAGAGA;GAGAGAGAGAGA;GAGAGAGAGAGAGA;GAGAGAGAGAGAGAGAGA;GAGAGAGAGAGAGAGAGAGA;GAGAGAGAGAGAGAGAGAGAGA;GAGAGAGAGAGAGAGAGAGAGAGA;GAGAGAGAGAGAGAGAGAGAGAGAGA;GAGAGAGAGAGAGAGAGAGAGAGAGAGA;GAGAGAGAGAGAGAGAGAGAGAGAGAGAG;GAGAGAGAGAGAGAGAGAGAGAGAGAGAGA;GAGAGAGAGAGAGAGAGAGAGAGAGAGAGAGA;GAGAGAGAGAGAGAGAGAGAGAGAGAGAGAGAGAGA;GAGAGAGAGAGAGAGAGAGAGAGAGAGAGAGAGAGAGA;GAGAGAGAGAGAGAGAGAGAGAGAGAGAG…	GAGAGAGAGAGAGAGAGAGAGAGA/GAGAGAGAGAGAGAGAGAGAGAGAGA	GAGAGAGAGAGAGAGAGAGA/GAGAGAGAGAGAGAGAGAGAGA	GAGAGAGAGAGAGAGAGAGAGAGAGAGAGAGAGAGA/GAGAGAGAGAGAGAGAGAGAGAGAGAGAGAGAGAGAGA	GAGAGAGAGAGAGAGAGAGAGAGAGAGA/GAGAGAGAGAGAGAGAGAGAGAGAGAGAGA	GAGAGAGAGAGAGAGAGAGAGAGAGAGA/GAGAGAGAGAGAGAGAGAGAGAGAGAGAGA	GAGAGAGAGAGA/GAGAGAGAGAGA	GAGAGAGAGAGAGAGA/GAGAGAGAGAGAGAGA	GAGAGAGAGA/GAGAGAGAGA	GAGAGAGAGAGAGAGAGAGAGAGAGAGAGAGAGAGA/GAGAGAGAGAGAGAGAGAGAGAGAGAGAGAGAGAGAGAGA	GAGAGAGAGAGAGAGAGAGAGAGAGAGAG/GAGAGAGAGAGAGAGAGAGAGAGAGAGAGA	GAGAGAGAGAGAGAGAGAGA/GAGAGAGAGAGAGAGAGAGAGAGAGAGAGAGAGAGAGAGA	GAGAGAGAGAGAGAGAGAGAGAGAGAGAGAGAGAGAGA/GAGAGAGAGAGAGAGAGAGAGAGAGAGAGAGAGAGAGAGAGA	GAGAGAGAGAGAGAGAGA/GAGAGAGAGAGAGAGAGAGA	GAGAGAGAGAGAGAGA/GAGAGAGAGAGAGAGAGAGAGAGAGAGAGA	GAGAGAGAGAGAGAGAGAGAGAGAGAGAGAGAGAGAGAGAGAGA/GAGAGAGAGAGAGAGAGAGAGAGAGAGAGAGAGAGAGAGAGAGA	GAGAGAGAGAGAGAGAGAGAGAGAGAGA/GAGAGAGAGAGAGAGAGAGAGAGAGAGAGAGAGAGAGAGA	GAGAGAGAGAGAGAGAGAGA/GAGAGAGAGAGAGAGAGAGAGA	GAGAGAGAGAGAGAGA/GAGAGAGAGAGAGAGA	GAGAGAGAGAGAGAGAGAGAGAGAGAGAGAGAGAGA/GAGAGAGAGAGAGAGAGAGAGAGAGAGAGAGAGAGAGA	GAGAGAGAGAGAGAGAGAGAGA/GAGAGAGAGAGAGAGAGAGAGAGA	GAGAGAGAGAGAGA/GAGAGAGAGAGAGAGAGAGAGAGAGAGAGAGAGAGAGA	GAGAGAGAGAGAGAGA/GAGAGAGAGAGAGAGA	GAGAGAGAGAGAGAGA/GAGAGAGAGAGAGAGA	GAGAGAGAGAGAGAGA/GAGAGAGAGAGAGAGAGAGAGAGAGAGAGAGAGAGAGA	GAGAGAGAGAGAGA/GAGAGAGAGAGAGAGA	GAGAGAGAGAGAGAGAGAGAGAGAGAGAGAGAGAGAGA/GAGAGAGAGAGAGAGAGAGAGAGAGAGAGAGAGAGAGAGA	GAGAGAGAGAGAGAGAGAGAGAGAGAGAGAGAGAGAGAGAGA/GAGAGAGAGAGAGAGAGAGAGAGAGAGAGAGAGAGAGAGAGA	GAGAGAGAGAGAGAGAGAGAGAGAGAGA/GAGAGAGAGAGAGAGAGAGAGAGAGAGAGA	GAGAGAGAGAGAGAGAGAGAGAGAGAGA/GAGAGAGAGAGAGAGAGAGAGAGAGAGAGA	GAGAGAGAGAGAGAGAGAGAGAGAGAGAGAGAGAGAGAGAGA/GAGAGAGAGAGAGAGAGAGAGAGAGAGAGAGAGAGAGAGAGAGA	GAGAGAGAGAGAGAGAGAGAGA/GAGAGAGAGAGAGAGAGAGAGA	GAGAGAGAGA/GAGAGAGAGA	GAGAGAGAGAGAGAGAGAGAGAGAGAGAGAGAGAGAGA/GAGAGAGAGAGAGAGAGAGAGAGAGAGAGAGAGAGAGAGA	GAGAGAGAGAGAGAGAGAGAGAGAGAGAGAGAGAGAGA/GAGAGAGAGAGAGAGAGAGAGAGAGAGAGAGAGAGAGAGA	GAGAGAGAGA/GAGAGAGAGAGAGAGAGAGAGAGAGAGAGAGA	GAGAGAGAGAGAGAGA/GAGAGAGAGAGAGAGAGAGAGAGAGAGAGAGA	GAGAGAGAGAGAGAGAGAGAGAGA/GAGAGAGAGAGAGAGAGAGAGAGAGA	GAGAGAGAGAGAGAGAGAGAGA/GAGAGAGAGAGAGAGAGAGAGAGAGAGAGAGAGAGAGA	GAGAGAGAGAGAGA/GAGAGAGAGAGAGAGA	GAGAGAGAGAGAGAGA/GAGAGAGAGAGAGAGAGAGAGAGAGAGAGA	GAGAGAGAGAGAGA/GAGAGAGAGAGAGAGA
Xunr83	4	4207578	ACGGTTTGACCCACCACCCACTCTGCTCCGTCCGCCACAC	63.688	GGCGCCTCGGCTTTGAAAGGTGGACGGTCGCTGCGAGAGG	64.517	CTTCTTCTTCTTCTTCTTC	CTTCTTCTTC;CTTCTTCTTCTTC;CTTCTTCTTCTTCTTC;CTTCTTCTTCTTCTTCTTCTTC;CTTCTTCTTCTTCTTCTTCTTCTTC;CTTCTTCTTCTTCTTCTTCTTCTTCTTC;CTTCTTCTTCTTCTTCTTCTTCTTCTTCTTC	CTTCTTCTTC/CTTCTTCTTC	CTTCTTCTTC/CTTCTTCTTC	CTTCTTCTTC/CTTCTTCTTC	CTTCTTCTTC/CTTCTTCTTC	CTTCTTCTTCTTCTTCTTCTTCTTC/CTTCTTCTTCTTCTTCTTCTTCTTC	CTTCTTCTTCTTCTTCTTC/CTTCTTCTTCTTCTTCTTC	CTTCTTCTTCTTCTTCTTC/CTTCTTCTTCTTCTTCTTC	CTTCTTCTTCTTCTTC/CTTCTTCTTCTTCTTC	CTTCTTCTTC/CTTCTTCTTC	CTTCTTCTTCTTCTTCTTCTTCTTC/CTTCTTCTTCTTCTTCTTCTTCTTC	CTTCTTCTTC/CTTCTTCTTC	CTTCTTCTTC/CTTCTTCTTC	CTTCTTCTTCTTCTTCTTC/CTTCTTCTTCTTCTTCTTC	CTTCTTCTTC/CTTCTTCTTC	CTTCTTCTTC/CTTCTTCTTC	CTTCTTCTTC/CTTCTTCTTC	CTTCTTCTTCTTC/CTTCTTCTTCTTCTTCTTCTTC	CTTCTTCTTCTTCTTCTTC/CTTCTTCTTCTTCTTCTTC	CTTCTTCTTC/CTTCTTCTTC	CTTCTTCTTC/CTTCTTCTTC	CTTCTTCTTCTTCTTCTTC/CTTCTTCTTCTTCTTCTTC	CTTCTTCTTC/CTTCTTCTTC	CTTCTTCTTCTTCTTCTTC/CTTCTTCTTCTTCTTCTTC	CTTCTTCTTC/CTTCTTCTTC	CTTCTTCTTCTTCTTCTTC/CTTCTTCTTCTTCTTCTTC	CTTCTTCTTC/CTTCTTCTTC	CTTCTTCTTC/CTTCTTCTTC	CTTCTTCTTC/CTTCTTCTTC	CTTCTTCTTC/CTTCTTCTTC	CTTCTTCTTC/CTTCTTCTTC	CTTCTTCTTC/CTTCTTCTTC	CTTCTTCTTCTTCTTCTTC/CTTCTTCTTCTTCTTCTTC	CTTCTTCTTC/CTTCTTCTTC	CTTCTTCTTC/CTTCTTCTTC	CTTCTTCTTC/CTTCTTCTTC	CTTCTTCTTCTTC/CTTCTTCTTCTTCTTCTTCTTCTTC	CTTCTTCTTC/CTTCTTCTTC	CTTCTTCTTC/CTTCTTCTTC	CTTCTTCTTC/CTTCTTCTTC	CTTCTTCTTC/CTTCTTCTTC	CTTCTTCTTCTTCTTCTTC/CTTCTTCTTCTTCTTCTTC
Xunr84	4	9322419	GCACCTCGTTGCCGTTCCTTCGCGCGACGCGCGCGTCGAG	67.779	TCCTCCCGCGCGCCCCTCCTCCCCCGCCGCCGCTGCTGAC	71.44	GGCGTCGGCGTCGGCGTCGGCGGAGGCGGAGGCGGAGGCG	GGCGTCGGCGTCGGCG;GGCGTCGGCGTCGGCGTCGGCG;GGCGTCGGCGTCGGCGTCGGCGGAGGCG;GGCGTCGGCGTCGGCGTCGGCGGAGGCGGAGGCG;GGCGTCGGCGTCGGCGTCGGCGGAGGCGGAGGCGGAGGCGTCGGCG;GGCGTCGGCGTCGGCGTCGGCGGAGGCGGAGGCGGAGGCGTCGGCGTCGGCG;GGCGTCGGCGTCGGCGTCGGCGGAGGCGGAGGCGGAGGCGTCGGCGTCGGCGTCGGCGTCGGCG	./.	./.	./.	GGCGTCGGCGTCGGCGTCGGCGGAGGCGGAGGCG/GGCGTCGGCGTCGGCGTCGGCGGAGGCGGAGGCG	GGCGTCGGCGTCGGCGTCGGCGGAGGCGGAGGCGGAGGCGTCGGCGTCGGCG/GGCGTCGGCGTCGGCGTCGGCGGAGGCGGAGGCGGAGGCGTCGGCGTCGGCG	GGCGTCGGCGTCGGCGTCGGCGGAGGCGGAGGCGGAGGCGTCGGCGTCGGCG/GGCGTCGGCGTCGGCGTCGGCGGAGGCGGAGGCGGAGGCGTCGGCGTCGGCG	GGCGTCGGCGTCGGCGTCGGCGGAGGCGGAGGCGGAGGCG/GGCGTCGGCGTCGGCGTCGGCGGAGGCGGAGGCGGAGGCG	./.	./.	./.	./.	GGCGTCGGCGTCGGCGTCGGCGGAGGCGGAGGCGGAGGCGTCGGCG/GGCGTCGGCGTCGGCGTCGGCGGAGGCGGAGGCGGAGGCGTCGGCG	GGCGTCGGCGTCGGCGTCGGCGGAGGCGGAGGCGGAGGCGTCGGCG/GGCGTCGGCGTCGGCGTCGGCGGAGGCGGAGGCGGAGGCGTCGGCG	GGCGTCGGCGTCGGCGTCGGCG/GGCGTCGGCGTCGGCGTCGGCGGAGGCGGAGGCG	./.	./.	./.	./.	./.	./.	GGCGTCGGCGTCGGCGTCGGCGGAGGCGGAGGCGGAGGCG/GGCGTCGGCGTCGGCGTCGGCGGAGGCGGAGGCGGAGGCG	./.	GGCGTCGGCGTCGGCGTCGGCGGAGGCGGAGGCGGAGGCGTCGGCGTCGGCG/GGCGTCGGCGTCGGCGTCGGCGGAGGCGGAGGCGGAGGCGTCGGCGTCGGCG	GGCGTCGGCGTCGGCGTCGGCGGAGGCGGAGGCGGAGGCGTCGGCGTCGGCG/GGCGTCGGCGTCGGCGTCGGCGGAGGCGGAGGCGGAGGCGTCGGCGTCGGCG	./.	GGCGTCGGCGTCGGCGTCGGCGGAGGCGGAGGCGGAGGCGTCGGCGTCGGCG/GGCGTCGGCGTCGGCGTCGGCGGAGGCGGAGGCGGAGGCGTCGGCGTCGGCG	./.	./.	GGCGTCGGCGTCGGCGTCGGCGGAGGCGGAGGCGGAGGCG/GGCGTCGGCGTCGGCGTCGGCGGAGGCGGAGGCGGAGGCG	./.	./.	./.	./.	./.	./.	./.	GGCGTCGGCGTCGGCG/GGCGTCGGCGTCGGCG	./.	GGCGTCGGCGTCGGCGTCGGCGGAGGCGGAGGCGGAGGCG/GGCGTCGGCGTCGGCGTCGGCGGAGGCGGAGGCGGAGGCG	GGCGTCGGCGTCGGCGTCGGCGGAGGCGGAGGCGGAGGCG/GGCGTCGGCGTCGGCGTCGGCGGAGGCGGAGGCGGAGGCG	GGCGTCGGCGTCGGCGTCGGCGGAGGCGGAGGCGGAGGCG/GGCGTCGGCGTCGGCGTCGGCGGAGGCGGAGGCGGAGGCG
Xunr85	4	12412079	AACAAAAAGAGCTCTATACTCCACAGACCTGCTGTTTCTT	52.803	TTGGCCCTAGACCTGGTGCCTGGGCCGGGGAGGTGAACAG	63.948	AATAAATAAATAAATA	AATAAATAAATAAATAAA;AATAAATAAATAAATAAATA;AATAAATAAATAAATAAATAAA;AATAAATAAATAAATAAATAAAT;AATAAATAAATAAATAAATAAATA;AATAAATAAATAAATAAATAAATAAATA;AATAAATAAATAAATAAATAAATAAATAAATAAATA;AATAAATAAATAAATAAATAAATAAATAAATAAATAAATAAATAAATAAATA;AATAAATAAATAAATAAATAAATAAATAAATAAATAAATAAATAAATAAATAAATA;AATAAATAAATAAATAAATAAATAAATAAATAAATAAATAAATAAATAAATAAATAAATA	./.	AATAAATAAATAAATAAATAAATAAATA/AATAAATAAATAAATAAATAAATAAATA	AATAAATAAATAAATAAATAAATAAATAAATAAATA/AATAAATAAATAAATAAATAAATAAATAAATAAATA	AATAAATAAATAAATAAATAAATAAATAAATAAATA/AATAAATAAATAAATAAATAAATAAATAAATAAATA	AATAAATAAATAAATAAATAAATAAATA/AATAAATAAATAAATAAATAAATAAATA	AATAAATAAATAAATAAATAAATA/AATAAATAAATAAATAAATAAATA	AATAAATAAATAAATA/AATAAATAAATAAATA	AATAAATAAATAAATAAATAAATA/AATAAATAAATAAATAAATAAATA	AATAAATAAATAAATA/AATAAATAAATAAATAAATAAATA	AATAAATAAATAAATA/AATAAATAAATAAATA	./.	AATAAATAAATAAATA/AATAAATAAATAAATAAATAAATAAATAAATAAATA	AATAAATAAATAAATAAATAAATA/AATAAATAAATAAATAAATAAATA	AATAAATAAATAAATA/AATAAATAAATAAATAAATAAATAAATAAATAAATA	./.	./.	AATAAATAAATAAATA/AATAAATAAATAAATAAATAAATAAATAAATAAATA	AATAAATAAATAAATAAATAAATAAATAAATAAATA/AATAAATAAATAAATAAATAAATAAATAAATAAATA	./.	AATAAATAAATAAATAAATAAATA/AATAAATAAATAAATAAATAAATA	AATAAATAAATAAATA/AATAAATAAATAAATA	AATAAATAAATAAATA/AATAAATAAATAAATA	AATAAATAAATAAATA/AATAAATAAATAAATA	AATAAATAAATAAATA/AATAAATAAATAAATA	AATAAATAAATAAATA/AATAAATAAATAAATA	./.	./.	AATAAATAAATAAATA/AATAAATAAATAAATA	AATAAATAAATAAATA/AATAAATAAATAAATA	AATAAATAAATAAATAAATAAATAAATAAATAAATA/AATAAATAAATAAATAAATAAATAAATAAATAAATA	AATAAATAAATAAATAAATAAATAAATAAATAAATA/AATAAATAAATAAATAAATAAATAAATAAATAAATA	AATAAATAAATAAATAAATAAATA/AATAAATAAATAAATAAATAAATA	AATAAATAAATAAATA/AATAAATAAATAAATAAATAAATAAATAAATAAATA	AATAAATAAATAAATAAATAAATAAATAAATAAATA/AATAAATAAATAAATAAATAAATAAATAAATAAATA	AATAAATAAATAAATAAATAAATA/AATAAATAAATAAATAAATAAATA	AATAAATAAATAAATA/AATAAATAAATAAATAAATAAATAAATAAATAAATA	./.	AATAAATAAATAAATAAA/AATAAATAAATAAATAAATAAATAAATAAATAAATA	./.	AATAAATAAATAAATA/AATAAATAAATAAATA	AATAAATAAATAAATA/AATAAATAAATAAATA
Xunr86	4	14183995	CCTCCTCCCCACGTCGCTCACCTTCCTTCCTCCCCTACCC	62.222	GCAGCATGGGGAAGGGATTGGAGGGTTCGGGAATGAGGAC	60.163	CTCTCTCTCTCTCTCTCTCTCTCTCTCTCTCTCTCTCTCT	CTCTCTCTCTCTCTCTCTCTCTCTCTCTCTCTCTCTCTCT;CTCTCTCTCTCT;CTCTCTCTCTCTCT;CTCTCTCTCTCTCTCTCT;CTCTCTCTCTCTCTCTCTCT;CTCTCTCTCTCTCTCTCTCTCT;CTCTCTCTCTCTCTCTCTCTCTCT;CTCTCTCTCTCTCTCTCTCTCTCTCT;CTCTCTCTCTCTCTCTCTCTCTCTCTCT;CTCTCTCTCTCTCTCTCTCTCTCTCTCTCT;CTCTCTCTCTCTCTCTCTCTCTCTCTCTCTCT;CTCTCTCTCTCTCTCTCTCTCTCTCTCTCTCTCT;CTCTCTCTCTCTCTCTCTCTCTCTCTCTCTCTCTCT;CTCTCTCTCTCTCTCTCTCTCTCTCTCTCTCTCTCTCT;CTCTCTCTCTC…	CTCTCTCTCTCTCTCTCTCTCTCTCT/CTCTCTCTCTCTCTCTCTCTCTCTCTCTCT	CTCTCTCTCTCTCTCTCTCTCTCTCTCTCTCTCT/CTCTCTCTCTCTCTCTCTCTCTCTCTCTCTCTCTCT	./.	CTCTCTCTCTCTCTCTCTCTCTCTCTCTCT/CTCTCTCTCTCTCTCTCTCTCTCTCTCTCTCT	CTCTCTCTCTCTCTCTCTCTCTCTCTCT/CTCTCTCTCTCTCTCTCTCTCTCTCTCTCTCTCTCTCTCT	CTCTCTCTCTCTCTCTCTCTCTCTCTCTCTCTCT/CTCTCTCTCTCTCTCTCTCTCTCTCTCTCTCTCTCT	./.	./.	CTCTCTCTCTCTCTCTCTCTCTCTCTCTCTCTCTCTCT/CTCTCTCTCTCTCTCTCTCTCTCTCTCTCTCTCTCTCTCT	CTCTCTCTCTCTCTCTCTCTCTCTCTCT/CTCTCTCTCTCTCTCTCTCTCTCTCTCTCT	CTCTCTCTCTCTCTCTCTCTCTCTCTCTCTCTCT/CTCTCTCTCTCTCTCTCTCTCTCTCTCTCTCTCTCT	CTCTCTCTCTCTCTCTCTCTCTCTCTCT/CTCTCTCTCTCTCTCTCTCTCTCTCTCTCT	CTCTCTCTCTCTCTCTCTCTCT/CTCTCTCTCTCTCTCTCTCTCTCT	CTCTCTCTCTCTCTCTCTCTCTCTCT/CTCTCTCTCTCTCTCTCTCTCTCTCTCTCT	CTCTCTCTCTCTCTCTCTCTCTCTCTCT/CTCTCTCTCTCTCTCTCTCTCTCTCTCTCT	CTCTCTCTCTCTCTCTCTCTCT/CTCTCTCTCTCTCTCTCTCTCTCTCTCTCTCTCTCT	./.	CTCTCTCTCTCTCTCTCTCTCTCTCTCTCTCTCT/CTCTCTCTCTCTCTCTCTCTCTCTCTCTCTCTCTCTCTCTCT	CTCTCTCTCTCTCTCTCTCTCTCTCTCT/CTCTCTCTCTCTCTCTCTCTCTCTCTCTCT	CTCTCTCTCTCTCTCTCTCTCT/CTCTCTCTCTCTCTCTCTCTCT	CTCTCTCTCTCTCTCTCTCTCTCTCTCT/CTCTCTCTCTCTCTCTCTCTCTCTCTCTCTCTCTCTCTCTCT	CTCTCTCTCTCTCTCTCTCT/CTCTCTCTCTCTCTCTCTCTCT	CTCTCTCTCTCTCTCTCTCTCTCTCTCTCTCTCTCTCTCTCT/CTCTCTCTCTCTCTCTCTCTCTCTCTCTCTCTCTCTCTCTCTCT	CTCTCTCTCTCTCTCTCTCTCTCTCTCT/CTCTCTCTCTCTCTCTCTCTCTCTCTCTCTCTCTCTCTCTCTCT	CTCTCTCTCTCTCTCTCTCTCTCTCTCTCTCTCTCTCTCT/CTCTCTCTCTCTCTCTCTCTCTCTCTCTCTCTCTCTCTCT	CTCTCTCTCTCTCTCTCTCT/CTCTCTCTCTCTCTCTCTCTCTCTCTCTCTCTCTCT	CTCTCTCTCTCTCTCTCTCTCTCTCTCT/CTCTCTCTCTCTCTCTCTCTCTCTCTCTCT	CTCTCTCTCTCTCTCTCTCT/CTCTCTCTCTCTCTCTCTCTCT	CTCTCTCTCTCTCTCTCTCTCTCTCTCTCTCTCTCT/CTCTCTCTCTCTCTCTCTCTCTCTCTCTCTCTCTCTCT	CTCTCTCTCTCTCTCTCTCT/CTCTCTCTCTCTCTCTCTCTCT	CTCTCTCTCTCTCTCTCTCTCTCTCTCTCTCTCTCT/CTCTCTCTCTCTCTCTCTCTCTCTCTCTCTCTCTCTCTCTCT	CTCTCTCTCTCTCTCTCTCTCTCTCTCTCTCTCTCT/CTCTCTCTCTCTCTCTCTCTCTCTCTCTCTCTCTCT	CTCTCTCTCTCTCTCTCTCTCTCTCTCTCTCT/CTCTCTCTCTCTCTCTCTCTCTCTCTCTCTCTCT	CTCTCTCTCTCTCTCTCTCT/CTCTCTCTCTCTCTCTCTCTCT	CTCTCTCTCTCTCTCTCTCTCTCTCTCT/CTCTCTCTCTCTCTCTCTCTCTCTCTCTCT	./.	CTCTCTCTCTCTCTCTCTCTCTCTCTCTCTCTCTCT/CTCTCTCTCTCTCTCTCTCTCTCTCTCTCTCTCTCTCTCT	CTCTCTCTCTCTCTCTCTCT/CTCTCTCTCTCTCTCTCTCTCT	CTCTCTCTCTCTCTCTCTCT/CTCTCTCTCTCTCTCTCTCTCT	CTCTCTCTCTCTCTCTCTCTCTCTCTCTCTCTCT/CTCTCTCTCTCTCTCTCTCTCTCTCTCTCTCTCT	CTCTCTCTCTCTCTCTCTCTCTCTCTCTCTCTCTCT/CTCTCTCTCTCTCTCTCTCTCTCTCTCTCTCTCTCTCTCTCT
Xunr87	4	14920456	GCTGGAGTAGCCAGCGATGCAAAGCGCGCGCCGTCAAAAG	63.533	AATTTCAGAGACGATCAGGGCCGTTTCCCTTTTCCCACAG	56.943	AGAGAGAGAGAGAGAGAGAGAGAGAGAGAGAGAGAGAGAGAGAG	AGAGAGAGAGAGAGAGAGAGAGAGAGAGAGAGAGAGAGAGAGAG;AGAGAGAGAG;AGAGAGAGAGAG;AGAGAGAGAGAGAGAG;AGAGAGAGAGAGAGAGAG;AGAGAGAGAGAGAGAGAGAG;AGAGAGAGAGAGAGAGAGAGAG;AGAGAGAGAGAGAGAGAGAGAGAG;AGAGAGAGAGAGAGAGAGAGAGAGA;AGAGAGAGAGAGAGAGAGAGAGAGAG;AGAGAGAGAGAGAGAGAGAGAGAGAGA;AGAGAGAGAGAGAGAGAGAGAGAGAGAG;AGAGAGAGAGAGAGAGAGAGAGAGAGAGA;AGAGAGAGAGAGAGAGAGAGAGAGAGAGAG;AGAGAGAGAGAGAGAGAGAGAGAGAGAGAGAG;AGAGAGAGAGAGAGAGAGAGA…	AGAGAGAGAGAGAGAGAGAGAGAGAG/AGAGAGAGAGAGAGAGAGAGAGAGAGAG	AGAGAGAGAGAGAGAGAGAGAGAGAGAGAGAGAG/AGAGAGAGAGAGAGAGAGAGAGAGAGAGAGAGAGAGAG	AGAGAGAGAGAGAGAGAGAGAGAGAGAGAGAGAGAGAGAGAG/AGAGAGAGAGAGAGAGAGAGAGAGAGAGAGAGAGAGAGAGAGAG	AGAGAGAGAGAGAGAGAGAGAGAGAGAG/AGAGAGAGAGAGAGAGAGAGAGAGAGAGAG	AGAGAGAGAGAGAGAGAGAGAGAGAGAG/AGAGAGAGAGAGAGAGAGAGAGAGAGAGAG	AGAGAGAGAGAGAGAGAGAGAGAGAG/AGAGAGAGAGAGAGAGAGAGAGAGAGAG	AGAGAGAGAGAGAGAGAGAGAGAGAGAGAGAGAGAGAGAGAG/AGAGAGAGAGAGAGAGAGAGAGAGAGAGAGAGAGAGAGAGAGAG	AGAGAGAGAGAGAGAGAGAGAGAGAGAGAG/AGAGAGAGAGAGAGAGAGAGAGAGAGAGAGAG	AGAGAGAGAGAGAGAGAGAGAGAGAGAGAGAGAGAGAGAGAGAGAGAG/AGAGAGAGAGAGAGAGAGAGAGAGAGAGAGAGAGAGAGAGAGAGAGAG	AGAGAGAGAGAGAGAGAG/AGAGAGAGAGAGAGAGAGAGAGAGAGAG	AGAGAGAGAGAGAGAGAGAGAGAGAGAG/AGAGAGAGAGAGAGAGAGAGAGAGAGAGAG	AGAGAGAGAGAGAGAGAGAGAGAGAGAG/AGAGAGAGAGAGAGAGAGAGAGAGAGAGAG	AGAGAGAGAGAGAGAGAGAGAGAGAG/AGAGAGAGAGAGAGAGAGAGAGAGAGAG	AGAGAGAGAGAGAGAGAGAGAGAGAG/AGAGAGAGAGAGAGAGAGAGAGAGAGAGAG	AGAGAGAGAGAGAGAGAGAGAGAGAGAG/AGAGAGAGAGAGAGAGAGAGAGAGAGAGAG	AGAGAGAGAGAGAGAGAGAGAGAGAGAGAG/AGAGAGAGAGAGAGAGAGAGAGAGAGAGAGAGAGAGAGAGAG	AGAGAGAGAGAGAGAGAGAGAGAGAGAGAGAGAG/AGAGAGAGAGAGAGAGAGAGAGAGAGAGAGAGAGAGAGAGAG	AGAGAGAGAGAGAGAGAGAGAGAGAGAGAGAGAG/AGAGAGAGAGAGAGAGAGAGAGAGAGAGAGAGAGAGAGAGAG	AGAGAGAGAGAGAGAGAGAGAGAGAGAG/AGAGAGAGAGAGAGAGAGAGAGAGAGAGAG	AGAGAGAGAGAGAGAGAGAGAGAGAGAGAG/AGAGAGAGAGAGAGAGAGAGAGAGAGAGAGAGAGAGAGAGAGAG	AGAGAGAGAGAGAGAGAGAGAGAGAGAGAG/AGAGAGAGAGAGAGAGAGAGAGAGAGAGAGAGAGAGAGAGAG	AGAGAGAGAGAGAGAGAGAGAGAGAG/AGAGAGAGAGAGAGAGAGAGAGAGAGAGAG	AGAGAGAGAGAGAGAGAGAGAGAGAGAGAGAGAGAGAGAGAG/AGAGAGAGAGAGAGAGAGAGAGAGAGAGAGAGAGAGAGAGAGAG	AGAGAGAGAGAGAGAGAGAGAGAGAGAGAG/AGAGAGAGAGAGAGAGAGAGAGAGAGAGAGAGAGAGAG	AGAGAGAGAGAGAGAGAGAGAGAG/AGAGAGAGAGAGAGAGAGAGAGAGAGAGAGAGAGAGAGAG	AGAGAGAGAGAGAGAGAGAGAGAGAG/AGAGAGAGAGAGAGAGAGAGAGAGAGAGAG	AGAGAGAGAGAGAGAGAGAGAGAGAGAG/AGAGAGAGAGAGAGAGAGAGAGAGAGAGAG	AGAGAGAGAGAGAGAGAGAGAGAGAG/AGAGAGAGAGAGAGAGAGAGAGAGAGAG	AGAGAGAGAGAGAGAGAGAG/AGAGAGAGAGAGAGAGAGAGAGAGAG	AGAGAGAGAGAGAGAGAGAGAGAGAGAG/AGAGAGAGAGAGAGAGAGAGAGAGAGAGAG	AGAGAGAGAGAGAGAGAGAGAGAGAG/AGAGAGAGAGAGAGAGAGAGAGAGAGAGAGAGAGAGAGAGAG	AGAGAGAGAGAGAGAGAGAGAGAGAGAGAGAGAGAGAGAGAGAG/AGAGAGAGAGAGAGAGAGAGAGAGAGAGAGAGAGAGAGAGAGAG	AGAGAGAGAGAGAGAGAGAGAGAGAGAG/AGAGAGAGAGAGAGAGAGAGAGAGAGAGAG	AGAGAGAGAGAGAGAGAGAGAGAGAG/AGAGAGAGAGAGAGAGAGAGAGAGAGAG	AGAGAGAGAGAGAGAGAGAGAGAGAGAG/AGAGAGAGAGAGAGAGAGAGAGAGAGAGAG	AGAGAGAGAGAGAGAGAGAGAGAGAGAGAGAGAG/AGAGAGAGAGAGAGAGAGAGAGAGAGAGAGAGAGAGAGAGAGAGAG	AGAGAGAGAGAGAGAGAGAGAGAGAGAGAGAGAG/AGAGAGAGAGAGAGAGAGAGAGAGAGAGAGAGAGAG	AGAGAGAGAGAGAGAGAGAGAGAGAGAG/AGAGAGAGAGAGAGAGAGAGAGAGAGAGAG	AGAGAGAGAGAGAGAGAGAGAGAGAG/AGAGAGAGAGAGAGAGAGAGAGAGAGAG	AGAGAGAGAGAGAGAGAGAGAGAGAGAGAGAGAGAGAGAG/AGAGAGAGAGAGAGAGAGAGAGAGAGAGAGAGAGAGAGAGAG	AGAGAGAGAGAGAGAGAGAGAGAGAGAGAGAGAGAGAGAGAGAG/AGAGAGAGAGAGAGAGAGAGAGAGAGAGAGAGAGAGAGAGAGAGAGAGAG
Xunr88	4	18013486	CAACGAGCGCGGCTACAGCTCACCCGGCCACCGCTGCCTG	66.96	CGCAGCGGGAGGCGCGCCAGACGATGGGTGACGGGCGATG	68.015	CGCCCGCCGCGCCCGCCC	CGCCCGCCGCGCCCGCCCCCCG	./.	./.	./.	./.	./.	./.	./.	./.	./.	./.	./.	./.	./.	./.	./.	./.	./.	./.	./.	./.	./.	./.	./.	./.	./.	./.	./.	./.	./.	./.	./.	./.	./.	./.	./.	./.	./.	./.	./.	./.	./.
Xunr89	4	54347450	AAAACTTCTTCTTTCTCGATGGTGATCGGTCATGGTATCC	53.181	AAGGAAATGAGTGCAAGTGGAGTCGATGGACAAGGGGAAG	56.622	TCTCTCTCTCTCTCTCTCTCT	TCTCTCTCTCTCTCTCTCTCT;TCTCTCTCTCT;TCTCTCTCTCTCT;TCTCTCTCTCTCTCT;TCTCTCTCTCTCTCTCT;TCTCTCTCTCTCTCTCTCT;TCTCTCTCTCTCTCTCTCTCTCT;TCTCTCTCTCTCTCTCTCTCTCTCT;TCTCTCTCTCTCTCTCTCTCTCTCTCT;TCTCTCTCTCTCTCTCTCTCTCTCTCTC;TCTCTCTCTCTCTCTCTCTCTCTCTCTCT;TCTCTCTCTCTCTCTCTCTCTCTCTCTCTCT;TCTCTCTCTCTCTCTCTCTCTCTCTCTCTCTCT;TCTCTCTCTCTCTCTCTCTCTCTCTCTCTCTCTCT;TCTCTCTCTCTCTCTCTCTCTCTCTCTCTCTCTCTCT;TCTCTCTCTCTCTCTCTCTC…	TCTCTCTCTCTCTCT/TCTCTCTCTCTCTCTCT	TCTCTCTCTCTCTCTCTCT/TCTCTCTCTCTCTCTCTCTCT	TCTCTCTCTCTCTCTCTCT/TCTCTCTCTCTCTCTCTCTCT	TCTCTCTCTCTCTCT/TCTCTCTCTCTCTCTCT	TCTCTCTCTCTCTCTCT/TCTCTCTCTCTCTCTCTCT	TCTCTCTCTCT/TCTCTCTCTCT	TCTCTCTCTCTCTCT/TCTCTCTCTCTCTCTCT	TCTCTCTCTCTCTCTCTCT/TCTCTCTCTCTCTCTCTCTCT	TCTCTCTCTCTCTCT/TCTCTCTCTCTCTCTCT	TCTCTCTCTCTCTCTCT/TCTCTCTCTCTCTCTCTCT	TCTCTCTCTCTCTCTCTCT/TCTCTCTCTCTCTCTCTCTCT	TCTCTCTCTCTCTCTCTCTCT/TCTCTCTCTCTCTCTCTCTCTCTCTCT	TCTCTCTCTCTCTCT/TCTCTCTCTCTCTCTCT	TCTCTCTCTCTCTCTCTCTCT/TCTCTCTCTCTCTCTCTCTCTCTCTCTCT	TCTCTCTCTCTCTCT/TCTCTCTCTCTCTCTCT	TCTCTCTCTCTCTCTCTCT/TCTCTCTCTCTCTCTCTCTCTCTCTCTCT	TCTCTCTCTCTCTCTCTCTCTCTCTCTCTCT/TCTCTCTCTCTCTCTCTCTCTCTCTCTCTCTCTCT	TCTCTCTCTCTCTCTCTCTCTCTCTCTCTCTCTCTCTCT/TCTCTCTCTCTCTCTCTCTCTCTCTCTCTCTCTCTCTCTCT	TCTCTCTCTCTCTCTCTCTCTCTCTCT/TCTCTCTCTCTCTCTCTCTCTCTCTCTCT	TCTCTCTCTCTCTCTCT/TCTCTCTCTCTCTCTCTCT	TCTCTCTCTCTCTCT/TCTCTCTCTCTCTCTCTCTCTCT	TCTCTCTCTCTCTCT/TCTCTCTCTCTCTCTCT	TCTCTCTCTCTCTCT/TCTCTCTCTCTCTCTCT	TCTCTCTCTCTCTCTCTCTCT/TCTCTCTCTCTCTCTCTCTCTCTCTCTCTCTCTCTCTCTCT	TCTCTCTCTCTCTCTCTCT/TCTCTCTCTCTCTCTCTCTCT	TCTCTCTCTCTCTCTCTCT/TCTCTCTCTCTCTCTCTCTCT	TCTCTCTCTCTCTCTCTCTCTCTCTCT/TCTCTCTCTCTCTCTCTCTCTCTCTCTCT	TCTCTCTCTCTCTCTCTCT/TCTCTCTCTCTCTCTCTCTCT	TCTCTCTCTCTCTCTCTCTCTCTCTCT/TCTCTCTCTCTCTCTCTCTCTCTCTCTCT	TCTCTCTCTCTCTCTCTCT/TCTCTCTCTCTCTCTCTCTCT	TCTCTCTCTCTCTCTCTCTCTCTCTCTCT/TCTCTCTCTCTCTCTCTCTCTCTCTCTCT	TCTCTCTCTCTCTCTCTCT/TCTCTCTCTCTCTCTCTCTCT	TCTCTCTCTCTCTCTCTCTCTCTCT/TCTCTCTCTCTCTCTCTCTCTCTCTCTCT	TCTCTCTCTCTCTCTCTCT/TCTCTCTCTCTCTCTCTCTCT	TCTCTCTCTCTCTCTCT/TCTCTCTCTCTCTCTCTCT	TCTCTCTCTCTCTCTCTCT/TCTCTCTCTCTCTCTCTCTCTCT	TCTCTCTCTCTCTCT/TCTCTCTCTCTCTCTCT	TCTCTCTCTCTCTCTCTCT/TCTCTCTCTCTCTCTCTCTCT	TCTCTCTCTCTCTCTCTCT/TCTCTCTCTCTCTCTCTCTCT	TCTCTCTCTCTCTCT/TCTCTCTCTCTCTCTCT	TCTCTCTCTCTCTCT/TCTCTCTCTCTCTCTCT
Xunr90	4	58623160	CCTCCCGCGCCGACGGCCCGGCCGGTACGCGTCGGTGCGC	72.419	GACATCTCCTGGAACCCCAGGTCCTCCGCCCCCTCCTTCG	62.534	GGCGTCGGCGTCGGCGTCGGCGTCGGCTTCGGCG	GGCGTCGGCGTCGGCGTCGGCG;GGCGTCGGCGTCGGCGTCGGCGTCGGCT;GGCGTCGGCGTCGGCGTCGGCGTCGGCTTCGG;GGCGTCGGCGTCGGCGTCGGCGTCGGCTTCGGC;GGCGTCGGCGTCGGCGTCGGCGTCGGCTTCGGCGTCGGCG	./.	GGCGTCGGCGTCGGCGTCGGCG/GGCGTCGGCGTCGGCGTCGGCG	GGCGTCGGCGTCGGCGTCGGCGTCGGCTTCGGCG/GGCGTCGGCGTCGGCGTCGGCGTCGGCTTCGGCG	GGCGTCGGCGTCGGCGTCGGCG/GGCGTCGGCGTCGGCGTCGGCG	GGCGTCGGCGTCGGCGTCGGCGTCGGCTTCGGCG/GGCGTCGGCGTCGGCGTCGGCGTCGGCTTCGGCG	GGCGTCGGCGTCGGCGTCGGCGTCGGCTTCGGCG/GGCGTCGGCGTCGGCGTCGGCGTCGGCTTCGGCG	./.	GGCGTCGGCGTCGGCGTCGGCGTCGGCTTCGGCG/GGCGTCGGCGTCGGCGTCGGCGTCGGCTTCGGCG	GGCGTCGGCGTCGGCGTCGGCGTCGGCTTCGGCG/GGCGTCGGCGTCGGCGTCGGCGTCGGCTTCGGCG	./.	GGCGTCGGCGTCGGCGTCGGCGTCGGCTTCGGCG/GGCGTCGGCGTCGGCGTCGGCGTCGGCTTCGGCG	GGCGTCGGCGTCGGCGTCGGCGTCGGCTTCGGCG/GGCGTCGGCGTCGGCGTCGGCGTCGGCTTCGGCG	GGCGTCGGCGTCGGCGTCGGCGTCGGCTTCGGCG/GGCGTCGGCGTCGGCGTCGGCGTCGGCTTCGGCG	GGCGTCGGCGTCGGCGTCGGCG/GGCGTCGGCGTCGGCGTCGGCG	./.	./.	GGCGTCGGCGTCGGCGTCGGCGTCGGCTTCGGCG/GGCGTCGGCGTCGGCGTCGGCGTCGGCTTCGGCG	GGCGTCGGCGTCGGCGTCGGCGTCGGCTTCGGCG/GGCGTCGGCGTCGGCGTCGGCGTCGGCTTCGGCG	GGCGTCGGCGTCGGCGTCGGCGTCGGCTTCGGCG/GGCGTCGGCGTCGGCGTCGGCGTCGGCTTCGGCG	./.	GGCGTCGGCGTCGGCGTCGGCGTCGGCT/GGCGTCGGCGTCGGCGTCGGCGTCGGCT	GGCGTCGGCGTCGGCGTCGGCGTCGGCT/GGCGTCGGCGTCGGCGTCGGCGTCGGCT	GGCGTCGGCGTCGGCGTCGGCGTCGGCTTCGGCG/GGCGTCGGCGTCGGCGTCGGCGTCGGCTTCGGCG	GGCGTCGGCGTCGGCGTCGGCG/GGCGTCGGCGTCGGCGTCGGCG	./.	GGCGTCGGCGTCGGCGTCGGCGTCGGCTTCGGCG/GGCGTCGGCGTCGGCGTCGGCGTCGGCTTCGGCG	GGCGTCGGCGTCGGCGTCGGCGTCGGCTTCGGCG/GGCGTCGGCGTCGGCGTCGGCGTCGGCTTCGGCG	GGCGTCGGCGTCGGCGTCGGCGTCGGCTTCGGCG/GGCGTCGGCGTCGGCGTCGGCGTCGGCTTCGGCG	GGCGTCGGCGTCGGCGTCGGCG/GGCGTCGGCGTCGGCGTCGGCG	GGCGTCGGCGTCGGCGTCGGCGTCGGCTTCGGCG/GGCGTCGGCGTCGGCGTCGGCGTCGGCTTCGGCG	./.	GGCGTCGGCGTCGGCGTCGGCGTCGGCTTCGGCG/GGCGTCGGCGTCGGCGTCGGCGTCGGCTTCGGCG	GGCGTCGGCGTCGGCGTCGGCGTCGGCTTCGGCG/GGCGTCGGCGTCGGCGTCGGCGTCGGCTTCGGCG	GGCGTCGGCGTCGGCGTCGGCGTCGGCTTCGGCG/GGCGTCGGCGTCGGCGTCGGCGTCGGCTTCGGCG	GGCGTCGGCGTCGGCGTCGGCGTCGGCTTCGGCG/GGCGTCGGCGTCGGCGTCGGCGTCGGCTTCGGCG	GGCGTCGGCGTCGGCGTCGGCGTCGGCTTCGGCG/GGCGTCGGCGTCGGCGTCGGCGTCGGCTTCGGCG	./.	GGCGTCGGCGTCGGCGTCGGCGTCGGCTTCGGCG/GGCGTCGGCGTCGGCGTCGGCGTCGGCTTCGGCG	GGCGTCGGCGTCGGCGTCGGCGTCGGCTTCGGCG/GGCGTCGGCGTCGGCGTCGGCGTCGGCTTCGGCG	./.	GGCGTCGGCGTCGGCGTCGGCGTCGGCTTCGGCG/GGCGTCGGCGTCGGCGTCGGCGTCGGCTTCGGCG
Xunr91	4	60369074	TTGGGATCATGCACTAGTTTTGCTAATCACTACAGTAAAC	51.2	AAGAGAAAAAACCCTATAGTAAGATTTCACTTTATAAGAG	45.682	TCTTATCTTATCTTAT	TCTTATCTTATCTTA;TCTTATCTTATCTTATCTTAT;TCTTATCTTATCTTATCTTATCTTAT	TCTTATCTTATCTTAT/TCTTATCTTATCTTAT	TCTTATCTTATCTTAT/TCTTATCTTATCTTAT	TCTTATCTTATCTTAT/TCTTATCTTATCTTAT	TCTTATCTTATCTTAT/TCTTATCTTATCTTAT	TCTTATCTTATCTTAT/TCTTATCTTATCTTAT	TCTTATCTTATCTTAT/TCTTATCTTATCTTAT	TCTTATCTTATCTTAT/TCTTATCTTATCTTAT	TCTTATCTTATCTTATCTTATCTTAT/TCTTATCTTATCTTATCTTATCTTAT	TCTTATCTTATCTTAT/TCTTATCTTATCTTAT	TCTTATCTTATCTTAT/TCTTATCTTATCTTATCTTATCTTAT	TCTTATCTTATCTTAT/TCTTATCTTATCTTAT	TCTTATCTTATCTTAT/TCTTATCTTATCTTAT	./.	TCTTATCTTATCTTATCTTAT/TCTTATCTTATCTTATCTTATCTTAT	./.	TCTTATCTTATCTTAT/TCTTATCTTATCTTAT	TCTTATCTTATCTTAT/TCTTATCTTATCTTAT	TCTTATCTTATCTTAT/TCTTATCTTATCTTAT	./.	TCTTATCTTATCTTAT/TCTTATCTTATCTTAT	TCTTATCTTATCTTAT/TCTTATCTTATCTTATCTTATCTTAT	TCTTATCTTATCTTAT/TCTTATCTTATCTTAT	TCTTATCTTATCTTAT/TCTTATCTTATCTTAT	TCTTATCTTATCTTAT/TCTTATCTTATCTTAT	TCTTATCTTATCTTAT/TCTTATCTTATCTTAT	TCTTATCTTATCTTAT/TCTTATCTTATCTTAT	TCTTATCTTATCTTATCTTAT/TCTTATCTTATCTTATCTTAT	TCTTATCTTATCTTA/TCTTATCTTATCTTAT	TCTTATCTTATCTTAT/TCTTATCTTATCTTAT	TCTTATCTTATCTTAT/TCTTATCTTATCTTAT	TCTTATCTTATCTTAT/TCTTATCTTATCTTAT	./.	TCTTATCTTATCTTAT/TCTTATCTTATCTTAT	TCTTATCTTATCTTAT/TCTTATCTTATCTTAT	TCTTATCTTATCTTAT/TCTTATCTTATCTTAT	TCTTATCTTATCTTAT/TCTTATCTTATCTTAT	./.	TCTTATCTTATCTTAT/TCTTATCTTATCTTAT	TCTTATCTTATCTTATCTTAT/TCTTATCTTATCTTATCTTAT	TCTTATCTTATCTTATCTTAT/TCTTATCTTATCTTATCTTATCTTAT	TCTTATCTTATCTTAT/TCTTATCTTATCTTAT
Xunr92	4	62080009	CTATCGCAGTAGTCTTATGTAATCCCAATTCCCAGTCACC	52.825	GTTGTGTAAACAAAACAGAGCTTTGATGCGGGGAGAGCAG	55.979	AGAGAGAGAGAGAGAGAGAGAGAGAGAGAGAGAGAG	AGAGAGAGAGAGAGAGAGAGAGAGAGAGAGAGAGAG;AGAGAGAGAGAGAG;AGAGAGAGAGAGAGAG;AGAGAGAGAGAGAGAGAG;AGAGAGAGAGAGAGAGAGA;AGAGAGAGAGAGAGAGAGAG;AGAGAGAGAGAGAGAGAGAGAG;AGAGAGAGAGAGAGAGAGAGAGAG;AGAGAGAGAGAGAGAGAGAGAGAGAG;AGAGAGAGAGAGAGAGAGAGAGAGAGAG;AGAGAGAGAGAGAGAGAGAGAGAGAGAGAG;AGAGAGAGAGAGAGAGAGAGAGAGAGAGAGAG;AGAGAGAGAGAGAGAGAGAGAGAGAGAGAGAGA;AGAGAGAGAGAGAGAGAGAGAGAGAGAGAGAGAG;AGAGAGAGAGAGAGAGAGAGAGAGAGAGAGAGA…	AGAGAGAGAGAGAGAGAGAG/AGAGAGAGAGAGAGAGAGAGAGAGAGAGAGAGAGAG	AGAGAGAGAGAGAGAGAGAGAGAGAGAG/AGAGAGAGAGAGAGAGAGAGAGAGAGAGAGAGAG	AGAGAGAGAGAGAGAGAGAGAGAGAGAGAGAGAGAG/AGAGAGAGAGAGAGAGAGAGAGAGAGAGAGAGAGAGAG	AGAGAGAGAGAGAGAGAGAGAGAGAGAG/AGAGAGAGAGAGAGAGAGAGAGAGAGAGAG	AGAGAGAGAGAGAGAGAGAGAGAG/AGAGAGAGAGAGAGAGAGAGAGAGAGAGAGAGAGA	AGAGAGAGAGAGAGAGAGAGAGAGAG/AGAGAGAGAGAGAGAGAGAGAGAGAGAG	./.	AGAGAGAGAGAGAGAGAG/AGAGAGAGAGAGAGAGAGAG	AGAGAGAGAGAGAGAGAG/AGAGAGAGAGAGAGAGAGAGAGAGAGAGAGAGAGAGAGAGAGAGAGAG	AGAGAGAGAGAGAGAGAGAGAGAGAGAGAGAGAGAG/AGAGAGAGAGAGAGAGAGAGAGAGAGAGAGAGAGAGAG	AGAGAGAGAGAGAGAGAGAGAGAGAGAGAGAGAG/AGAGAGAGAGAGAGAGAGAGAGAGAGAGAGAGAGAG	AGAGAGAGAGAGAGAGAGAGAG/AGAGAGAGAGAGAGAGAGAGAGAGAGAGAGAGA	AGAGAGAGAGAGAGAGAG/AGAGAGAGAGAGAGAGAGAGAGAGAGAGAG	AGAGAGAGAGAGAGAGAGAGAG/AGAGAGAGAGAGAGAGAGAGAGAGAGAGAGAGAG	./.	AGAGAGAGAGAGAGAGAGAGAGAGAGAGAGAGAG/AGAGAGAGAGAGAGAGAGAGAGAGAGAGAGAGAGAGAG	AGAGAGAGAGAGAGAGAGAGAGAGAGAGAGAGAGAG/AGAGAGAGAGAGAGAGAGAGAGAGAGAGAGAGAGAGAGAG	AGAGAGAGAGAGAGAGAGAGAGAGAGAGAGAG/AGAGAGAGAGAGAGAGAGAGAGAGAGAGAGAGAGAGAGAG	AGAGAGAGAGAGAGAGAGAGAGAGAG/AGAGAGAGAGAGAGAGAGAGAGAGAGAG	AGAGAGAGAGAGAGAGAGAGAGAGAGAGAGAGAGAG/AGAGAGAGAGAGAGAGAGAGAGAGAGAGAGAGAGAGAG	AGAGAGAGAGAGAG/AGAGAGAGAGAGAGAGAG	AGAGAGAGAGAGAGAGAGAGAGAG/AGAGAGAGAGAGAGAGAGAGAGAGAGAGAGAGAG	AGAGAGAGAGAGAGAGAGAGAGAGAGAGAGAGAG/AGAGAGAGAGAGAGAGAGAGAGAGAGAGAGAGAGAGAG	AGAGAGAGAGAGAGAGAGAGAGAGAGAGAGAGAGAG/AGAGAGAGAGAGAGAGAGAGAGAGAGAGAGAGAGAG	AGAGAGAGAGAGAGAGAGAGAGAGAGAGAGAGAG/AGAGAGAGAGAGAGAGAGAGAGAGAGAGAGAGAGAG	AGAGAGAGAGAGAGAGAGAGAGAGAGAGAGAGAG/AGAGAGAGAGAGAGAGAGAGAGAGAGAGAGAGAGAGAG	AGAGAGAGAGAGAGAGAGAGAGAGAGAGAGAGAGAGAGAGAGAGAG/AGAGAGAGAGAGAGAGAGAGAGAGAGAGAGAGAGAGAGAGAGAGAGAG	AGAGAGAGAGAGAGAGAGAGAGAGAGAGAGAGAGAGAGAGAGAG/AGAGAGAGAGAGAGAGAGAGAGAGAGAGAGAGAGAGAGAGAGAG	AGAGAGAGAGAGAGAGAGAGAGAGAGAGAGAGAGAGAGAG/AGAGAGAGAGAGAGAGAGAGAGAGAGAGAGAGAGAGAGAGAGAGAGAGAGAGAG	AGAGAGAGAGAGAGAGAG/AGAGAGAGAGAGAGAGAGAGAGAGAGAGAGAGAGAGAGAGAGAGAGAGAGAGAGAGAGAGAGAGAGAGAGAG	AGAGAGAGAGAGAGAGAGAGAGAGAGAG/AGAGAGAGAGAGAGAGAGAGAGAGAGAGAGAGAGAGAGAGAG	AGAGAGAGAGAGAGAGAGAG/AGAGAGAGAGAGAGAGAGAG	AGAGAGAGAGAGAGAGAGAGAGAGAGAGAGAGAGAG/AGAGAGAGAGAGAGAGAGAGAGAGAGAGAGAGAGAGAG	AGAGAGAGAGAGAGAGAGAGAGAGAGAGAGAGAG/AGAGAGAGAGAGAGAGAGAGAGAGAGAGAGAGAGAGAG	AGAGAGAGAGAGAGAGAGAGAGAGAGAGAGAGAGAG/AGAGAGAGAGAGAGAGAGAGAGAGAGAGAGAGAGAG	AGAGAGAGAGAGAGAGAGAGAGAGAGAGAGAG/AGAGAGAGAGAGAGAGAGAGAGAGAGAGAGAGAGAGAG	AGAGAGAGAGAGAGAGAGAGAGAGAGAGAGAGAGAGAGAGAGAG/AGAGAGAGAGAGAGAGAGAGAGAGAGAGAGAGAGAGAGAGAGAGAG	AGAGAGAGAGAGAGAGAGAGAGAGAGAGAGAGAG/AGAGAGAGAGAGAGAGAGAGAGAGAGAGAGAGAGAG	./.	AGAGAGAGAGAGAGAGAGAGAGAGAG/AGAGAGAGAGAGAGAGAGAGAGAGAGAGAGAGAGAGAGAG	AGAGAGAGAGAGAGAGAGAGAGAGAGAGAGAGAGAG/AGAGAGAGAGAGAGAGAGAGAGAGAGAGAGAGAGAGAGAGAGAGAGAGAG
Xunr93	4	63422016	CCGTAGAGTCCCATGCGCCGCCAAAGGGGCCCGCGTCATC	65.494	ACATGCGGGCGCACGGCGTTACCGAAGTCGACGGGCTCAG	65.516	TCGTCGTCGTCGTCG	TCGTCGTCGTCGTCG;TCGTCGTCGTCG;TCGTCGTCGTCGTCGTCG;TCGTCGTCGTCGTCGTCGTCGTCG;TCGTCGTCGTCGTCGTCGTCGTCGTCG;TCGTCGTCGTCGTCGTCGTCGTCGTCGTCG;TCGTCGTCGTCGTCGTCGTCGTCGTCGTCGTCG;TCGTCGTCGTCGTCGTCGTCGTCGTCGTCGTCGTCG	TCGTCGTCGTCGTCG/TCGTCGTCGTCGTCG	TCGTCGTCGTCG/TCGTCGTCGTCG	TCGTCGTCGTCGTCG/TCGTCGTCGTCGTCG	TCGTCGTCGTCGTCGTCGTCGTCGTCGTCGTCG/TCGTCGTCGTCGTCGTCGTCGTCGTCGTCGTCG	TCGTCGTCGTCG/TCGTCGTCGTCG	TCGTCGTCGTCGTCG/TCGTCGTCGTCGTCG	TCGTCGTCGTCG/TCGTCGTCGTCGTCGTCGTCGTCGTCGTCGTCG	TCGTCGTCGTCGTCGTCGTCGTCGTCGTCGTCG/TCGTCGTCGTCGTCGTCGTCGTCGTCGTCGTCG	TCGTCGTCGTCGTCG/TCGTCGTCGTCGTCG	TCGTCGTCGTCG/TCGTCGTCGTCG	TCGTCGTCGTCGTCGTCGTCGTCG/TCGTCGTCGTCGTCGTCGTCGTCG	TCGTCGTCGTCGTCGTCGTCGTCG/TCGTCGTCGTCGTCGTCGTCGTCG	TCGTCGTCGTCGTCGTCGTCGTCGTCGTCGTCG/TCGTCGTCGTCGTCGTCGTCGTCGTCGTCGTCG	TCGTCGTCGTCGTCGTCGTCGTCG/TCGTCGTCGTCGTCGTCGTCGTCG	TCGTCGTCGTCGTCGTCGTCGTCG/TCGTCGTCGTCGTCGTCGTCGTCG	TCGTCGTCGTCG/TCGTCGTCGTCGTCGTCGTCGTCGTCGTCGTCG	TCGTCGTCGTCGTCGTCGTCGTCG/TCGTCGTCGTCGTCGTCGTCGTCG	TCGTCGTCGTCGTCGTCGTCGTCG/TCGTCGTCGTCGTCGTCGTCGTCG	TCGTCGTCGTCGTCGTCGTCGTCGTCGTCGTCG/TCGTCGTCGTCGTCGTCGTCGTCGTCGTCGTCG	TCGTCGTCGTCG/TCGTCGTCGTCGTCGTCGTCGTCGTCGTCGTCG	TCGTCGTCGTCG/TCGTCGTCGTCGTCGTCGTCGTCGTCG	TCGTCGTCGTCGTCG/TCGTCGTCGTCGTCG	TCGTCGTCGTCGTCG/TCGTCGTCGTCGTCG	TCGTCGTCGTCGTCG/TCGTCGTCGTCGTCGTCGTCGTCG	TCGTCGTCGTCG/TCGTCGTCGTCGTCG	TCGTCGTCGTCGTCGTCGTCGTCG/TCGTCGTCGTCGTCGTCGTCGTCG	TCGTCGTCGTCGTCGTCGTCGTCG/TCGTCGTCGTCGTCGTCGTCGTCG	TCGTCGTCGTCGTCG/TCGTCGTCGTCGTCG	TCGTCGTCGTCGTCG/TCGTCGTCGTCGTCG	TCGTCGTCGTCGTCGTCGTCGTCG/TCGTCGTCGTCGTCGTCGTCGTCG	TCGTCGTCGTCGTCGTCGTCGTCG/TCGTCGTCGTCGTCGTCGTCGTCG	TCGTCGTCGTCGTCGTCGTCGTCGTCGTCGTCG/TCGTCGTCGTCGTCGTCGTCGTCGTCGTCGTCG	TCGTCGTCGTCGTCGTCGTCGTCG/TCGTCGTCGTCGTCGTCGTCGTCG	TCGTCGTCGTCGTCGTCGTCGTCG/TCGTCGTCGTCGTCGTCGTCGTCG	TCGTCGTCGTCG/TCGTCGTCGTCGTCGTCGTCGTCGTCGTCGTCG	TCGTCGTCGTCGTCG/TCGTCGTCGTCGTCG	TCGTCGTCGTCGTCG/TCGTCGTCGTCGTCG	TCGTCGTCGTCGTCG/TCGTCGTCGTCGTCG	TCGTCGTCGTCGTCGTCGTCGTCGTCGTCGTCG/TCGTCGTCGTCGTCGTCGTCGTCGTCGTCGTCG	TCGTCGTCGTCGTCGTCGTCGTCGTCGTCGTCG/TCGTCGTCGTCGTCGTCGTCGTCGTCGTCGTCG	TCGTCGTCGTCGTCGTCGTCGTCG/TCGTCGTCGTCGTCGTCGTCGTCG
Xunr94	4	64023343	AAAGCAAGCGCAGCCGCCAGCAGCGGATAACGAGCGAATC	62.998	TGTTTGTGATCTTGGACTTGGTTTTGCCGGGATGGGAGGA	57.714	GAGAGAGAGAGAGAGAGAGAGAGAGAGAGAGAGAGAGAGAGA	GAGAGAGAGAGAGAGAGAGAGAGAGAGAGAGAGAGAGAGAGA;GAGAGAGA;GAGAGAGAGA;GAGAGAGAGAGA;GAGAGAGAGAGAGA;GAGAGAGAGAGAGAGA;GAGAGAGAGAGAGAGAGAGA;GAGAGAGAGAGAGAGAGAGAG;GAGAGAGAGAGAGAGAGAGAGA;GAGAGAGAGAGAGAGAGAGAGAG;GAGAGAGAGAGAGAGAGAGAGAGA;GAGAGAGAGAGAGAGAGAGAGAGAGA;GAGAGAGAGAGAGAGAGAGAGAGAGAG;GAGAGAGAGAGAGAGAGAGAGAGAGAGA;GAGAGAGAGAGAGAGAGAGAGAGAGAGAGA;GAGAGAGAGAGAGAGAGAGAGAGAGAGAGAGA;GAGAGAGAGAGAGAGAGAGAGAGAGAGA…	GAGAGAGAGAGAGAGAGAGAGAGAGAGAGAGA/GAGAGAGAGAGAGAGAGAGAGAGAGAGAGAGAGA	GAGAGAGAGAGAGAGAGAGAGAGAGA/GAGAGAGAGAGAGAGAGAGAGAGAGAGA	GAGAGAGAGAGAGAGAGAGAGAGAGAGAGAGAGAGAGAGAGAGAGAGA/GAGAGAGAGAGAGAGAGAGAGAGAGAGAGAGAGAGAGAGAGAGAGAGA	GAGAGAGAGAGAGAGAGAGAGAGAGAGAGAGAGAGAGAGAGAGAGA/GAGAGAGAGAGAGAGAGAGAGAGAGAGAGAGAGAGAGAGAGAGAGAGAGA	GAGAGAGAGAGAGAGAGAGAGA/GAGAGAGAGAGAGAGAGAGAGAGA	GAGAGAGAGAGAGAGAGAGA/GAGAGAGAGAGAGAGAGAGAGAGAGAGAGAGAGAGAGAGAGAGA	GAGAGAGAGAGAGAGAGAGAGAGAGAGA/GAGAGAGAGAGAGAGAGAGAGAGAGAGAGAGAGAGAGA	GAGAGAGAGAGAGAGAGAGAGAGAGAGA/GAGAGAGAGAGAGAGAGAGAGAGAGAGAGAGAGAGA	GAGAGAGAGAGAGAGAGAGAGAGAGAGAGAGAGAGAGAGA/GAGAGAGAGAGAGAGAGAGAGAGAGAGAGAGAGAGAGAGAGA	GAGAGAGAGAGAGAGAGAGAGA/GAGAGAGAGAGAGAGAGAGAGAGA	GAGAGAGAGAGAGAGAGAGAGAGAGAGAGAGAGAGAGAGAGA/GAGAGAGAGAGAGAGAGAGAGAGAGAGAGAGAGAGAGAGAGA	GAGAGAGAGAGAGAGAGAGAGAGAGAGAGAGAGA/GAGAGAGAGAGAGAGAGAGAGAGAGAGAGAGAGAGAGAGA	GAGAGAGAGAGAGAGAGAGAGAGAGAGAGAGA/GAGAGAGAGAGAGAGAGAGAGAGAGAGAGAGAGA	GAGAGAGAGAGAGAGAGAGA/GAGAGAGAGAGAGAGAGAGAGAGAGAGAGAGAGA	GAGAGAGAGAGAGAGAGAGAGAGAGAGAGAGAGAGAGA/GAGAGAGAGAGAGAGAGAGAGAGAGAGAGAGAGAGAGAGA	GAGAGAGAGAGAGAGAGAGAGAGAGAGAGAGAGAGAGAGA/GAGAGAGAGAGAGAGAGAGAGAGAGAGAGAGAGAGAGAGAGA	GAGAGAGAGAGAGAGAGAGAGAGAGAGAGAGAGAGA/GAGAGAGAGAGAGAGAGAGAGAGAGAGAGAGAGAGAGA	GAGAGAGAGAGAGAGAGAGAGAGAGAGAGAGAGAGAGA/GAGAGAGAGAGAGAGAGAGAGAGAGAGAGAGAGAGAGAGAGAGA	GAGAGAGAGAGAGAGAGAGAGAGAGAGAGA/GAGAGAGAGAGAGAGAGAGAGAGAGAGAGAGA	GAGAGAGAGAGAGAGAGAGAGAGA/GAGAGAGAGAGAGAGAGAGAGAGAGAGA	GAGAGAGAGAGAGAGAGAGAGA/GAGAGAGAGAGAGAGAGAGAGAGAGAGAGAGAGAGAGAGAGAGA	GAGAGAGAGAGAGAGAGAGAGAGA/GAGAGAGAGAGAGAGAGAGAGAGAGA	GAGAGAGAGAGAGAGAGAGAGAGA/GAGAGAGAGAGAGAGAGAGAGAGAGA	GAGAGAGAGAGAGAGAGAGAGAGAGA/GAGAGAGAGAGAGAGAGAGAGAGAGAGAGAGAGAGAGAGAGAGAGA	GAGAGAGAGAGAGAGAGAGAGAGAGAGAGAGAGAGAGA/GAGAGAGAGAGAGAGAGAGAGAGAGAGAGAGAGAGAGAGAGA	GAGAGAGAGAGAGAGAGAGAGAGAGAGAGAGAGAGAGAGA/GAGAGAGAGAGAGAGAGAGAGAGAGAGAGAGAGAGAGAGAGA	GAGAGAGAGAGAGAGAGAGA/GAGAGAGAGAGAGAGAGAGAGA	GAGAGAGAGAGAGAGAGAGAGAGAGAGAGAGAGAGAGAGA/GAGAGAGAGAGAGAGAGAGAGAGAGAGAGAGAGAGAGAGA	GAGAGAGAGAGAGAGAGAGAGAGAGAGAGAGAGAGAGA/GAGAGAGAGAGAGAGAGAGAGAGAGAGAGAGAGAGAGAGAGA	./.	GAGAGAGAGAGAGAGAGAGAGAGAGAGAGAGA/GAGAGAGAGAGAGAGAGAGAGAGAGAGAGAGAGAGA	GAGAGAGAGAGAGAGAGAGAGAGAGAGAGAGA/GAGAGAGAGAGAGAGAGAGAGAGAGAGAGAGAGA	GAGAGAGAGAGAGAGAGAGAGAGAGAGAGAGAGAGAGA/GAGAGAGAGAGAGAGAGAGAGAGAGAGAGAGAGAGAGAGAGA	GAGAGAGAGAGAGAGAGAGAGAGAGAGAGAGAGAGAGA/GAGAGAGAGAGAGAGAGAGAGAGAGAGAGAGAGAGAGAGAGA	GAGAGAGAGAGAGAGAGAGA/GAGAGAGAGAGAGAGAGAGAGAGAGAGAGAGAGAGAGA	GAGAGAGAGAGAGAGAGAGAGAGAGAGAGAGAGAGAGAGAGAGA/GAGAGAGAGAGAGAGAGAGAGAGAGAGAGAGAGAGAGAGAGAGAGAGAGA	GAGAGAGAGAGAGAGAGAGAGAGAGAGAGAGAGAGA/GAGAGAGAGAGAGAGAGAGAGAGAGAGAGAGAGAGAGA	GAGAGAGAGAGAGAGAGAGA/GAGAGAGAGAGAGAGAGAGAGAGAGAGAGAGAGAGAGAGAGAGAGA	GAGAGAGAGAGAGAGAGAGAGAGAGAGAGAGAGA/GAGAGAGAGAGAGAGAGAGAGAGAGAGAGAGAGAGAGA	GAGAGAGAGAGAGAGAGAGAGAGAGAGAGAGAGAGA/GAGAGAGAGAGAGAGAGAGAGAGAGAGAGAGAGAGAGA	GAGAGAGAGAGAGAGAGAGAGAGAGAGAGAGA/GAGAGAGAGAGAGAGAGAGAGAGAGAGAGAGAGAGA
Xunr95	4	64421529	GGATCGGGAGGTGTCCCAAGTCAGATTCTAACGTCTCTGC	57.381	CGCGAACCGGCCCGAGCCGTGTGGTGGTGTTGTGGTCCTC	65.598	CCGCACCCGCACCCGCACCCGCAC	CCGCACCCGCACCCGCA;CCGCACCCGCACCCGCAC;CCGCACCCGCACCCGCACC;CCGCACCCGCACCCGCACCCGCA;CCGCACCCGCACCCGCACCCGCACCCGCAC	CCGCACCCGCACCCGCACCCGCAC/CCGCACCCGCACCCGCACCCGCAC	CCGCACCCGCACCCGCACCCGCAC/CCGCACCCGCACCCGCACCCGCAC	CCGCACCCGCACCCGCACCCGCAC/CCGCACCCGCACCCGCACCCGCAC	CCGCACCCGCACCCGCACCCGCAC/CCGCACCCGCACCCGCACCCGCAC	CCGCACCCGCACCCGCACCCGCAC/CCGCACCCGCACCCGCACCCGCAC	CCGCACCCGCACCCGCACCCGCAC/CCGCACCCGCACCCGCACCCGCAC	CCGCACCCGCACCCGCACCCGCAC/CCGCACCCGCACCCGCACCCGCAC	CCGCACCCGCACCCGCACCCGCAC/CCGCACCCGCACCCGCACCCGCAC	CCGCACCCGCACCCGCACCCGCAC/CCGCACCCGCACCCGCACCCGCAC	CCGCACCCGCACCCGCACCCGCAC/CCGCACCCGCACCCGCACCCGCAC	CCGCACCCGCACCCGCACCCGCAC/CCGCACCCGCACCCGCACCCGCAC	CCGCACCCGCACCCGCACCCGCAC/CCGCACCCGCACCCGCACCCGCAC	CCGCACCCGCACCCGCACCCGCAC/CCGCACCCGCACCCGCACCCGCAC	CCGCACCCGCACCCGCACCCGCAC/CCGCACCCGCACCCGCACCCGCAC	CCGCACCCGCACCCGCACCCGCAC/CCGCACCCGCACCCGCACCCGCAC	CCGCACCCGCACCCGCACCCGCAC/CCGCACCCGCACCCGCACCCGCAC	CCGCACCCGCACCCGCACCCGCAC/CCGCACCCGCACCCGCACCCGCAC	CCGCACCCGCACCCGCACCCGCAC/CCGCACCCGCACCCGCACCCGCAC	CCGCACCCGCACCCGCACCCGCAC/CCGCACCCGCACCCGCACCCGCAC	CCGCACCCGCACCCGCACCCGCAC/CCGCACCCGCACCCGCACCCGCAC	CCGCACCCGCACCCGCACCCGCAC/CCGCACCCGCACCCGCACCCGCAC	CCGCACCCGCACCCGCACCCGCAC/CCGCACCCGCACCCGCACCCGCAC	CCGCACCCGCACCCGCACCCGCAC/CCGCACCCGCACCCGCACCCGCAC	CCGCACCCGCACCCGCACCCGCAC/CCGCACCCGCACCCGCACCCGCAC	CCGCACCCGCACCCGCACCCGCAC/CCGCACCCGCACCCGCACCCGCAC	CCGCACCCGCACCCGCACCCGCAC/CCGCACCCGCACCCGCACCCGCAC	CCGCACCCGCACCCGCACCCGCAC/CCGCACCCGCACCCGCACCCGCAC	CCGCACCCGCACCCGCACCCGCAC/CCGCACCCGCACCCGCACCCGCAC	CCGCACCCGCACCCGCACCCGCAC/CCGCACCCGCACCCGCACCCGCAC	CCGCACCCGCACCCGCACCCGCAC/CCGCACCCGCACCCGCACCCGCAC	CCGCACCCGCACCCGCACCCGCAC/CCGCACCCGCACCCGCACCCGCAC	CCGCACCCGCACCCGCACCCGCAC/CCGCACCCGCACCCGCACCCGCAC	CCGCACCCGCACCCGCACCCGCAC/CCGCACCCGCACCCGCACCCGCAC	CCGCACCCGCACCCGCACCCGCAC/CCGCACCCGCACCCGCACCCGCAC	CCGCACCCGCACCCGCACCCGCAC/CCGCACCCGCACCCGCACCCGCAC	CCGCACCCGCACCCGCACCCGCAC/CCGCACCCGCACCCGCACCCGCAC	CCGCACCCGCACCCGCACCCGCAC/CCGCACCCGCACCCGCACCCGCAC	CCGCACCCGCACCCGCACCCGCAC/CCGCACCCGCACCCGCACCCGCAC	CCGCACCCGCACCCGCACCCGCAC/CCGCACCCGCACCCGCACCCGCAC	CCGCACCCGCACCCGCACCCGCAC/CCGCACCCGCACCCGCACCCGCAC	CCGCACCCGCACCCGCACCCGCAC/CCGCACCCGCACCCGCACCCGCAC
Xunr96	4	64650481	ACTGTCTCTACAACTGTGGTTGGAGGATATCCCTTAATGC	53.519	CTACTTAAACTTTTTGCTTGTACAAATTAGAAGGCTTACG	48.955	TTCTTTCTTTCTTTCTTTC	TTCTTTCTTTC;TTCTTTCTTTCTTTC;TTCTTTCTTTCTTTCTTTCTTTC;TTCTTTCTTTCTTTCTTTCTTTCTTTC;TTCTTTCTTTCTTTCTTTCTTTCTTTCTTTC;TTCTTTCTTTCTTTCTTTCTTTCTTTCTTTCTTTC;TTCTTTCTTTCTTTCTTTCTTTCTTTCTTTCTTTCTTT;TTCTTTCTTTCTTTCTTTCTTTCTTTCTTTCTTTCTTTC;TTCTTTCTTTCTTTCTTTCTTTCTTTCTTTCTTTCTTTCTTT;TTCTTTCTTTCTTTCTTTCTTTCTTTCTTTCTTTCTTTCTTTC;TTCTTTCTTTCTTTCTTTCTTTCTTTCTTTCTTTCTTTCTTTCTTTC;TTCTTTCTTTCTTTCTTTCTTTCTTTCTTTCTTTCTT…	TTCTTTCTTTCTTTCTTTCTTTCTTTCTTTC/TTCTTTCTTTCTTTCTTTCTTTCTTTCTTTC	TTCTTTCTTTCTTTCTTTC/TTCTTTCTTTCTTTCTTTC	TTCTTTCTTTCTTTCTTTC/TTCTTTCTTTCTTTCTTTC	TTCTTTCTTTCTTTCTTTCTTTC/TTCTTTCTTTCTTTCTTTCTTTC	TTCTTTCTTTCTTTCTTTC/TTCTTTCTTTCTTTCTTTC	TTCTTTCTTTCTTTCTTTC/TTCTTTCTTTCTTTCTTTC	TTCTTTCTTTCTTTCTTTC/TTCTTTCTTTCTTTCTTTC	TTCTTTCTTTCTTTCTTTC/TTCTTTCTTTCTTTCTTTC	TTCTTTCTTTCTTTCTTTC/TTCTTTCTTTCTTTCTTTC	TTCTTTCTTTCTTTCTTTC/TTCTTTCTTTCTTTCTTTC	TTCTTTCTTTCTTTCTTTC/TTCTTTCTTTCTTTCTTTC	TTCTTTCTTTCTTTCTTTC/TTCTTTCTTTCTTTCTTTC	TTCTTTCTTTCTTTCTTTC/TTCTTTCTTTCTTTCTTTC	TTCTTTCTTTCTTTCTTTC/TTCTTTCTTTCTTTCTTTC	TTCTTTCTTTCTTTCTTTC/TTCTTTCTTTCTTTCTTTC	TTCTTTCTTTCTTTCTTTC/TTCTTTCTTTCTTTCTTTC	TTCTTTCTTTCTTTCTTTC/TTCTTTCTTTCTTTCTTTC	TTCTTTCTTTCTTTCTTTC/TTCTTTCTTTCTTTCTTTC	TTCTTTCTTTCTTTCTTTC/TTCTTTCTTTCTTTCTTTC	TTCTTTCTTTCTTTCTTTCTTTC/TTCTTTCTTTCTTTCTTTCTTTC	TTCTTTCTTTCTTTCTTTC/TTCTTTCTTTCTTTCTTTC	TTCTTTCTTTCTTTCTTTC/TTCTTTCTTTCTTTCTTTC	TTCTTTCTTTCTTTCTTTC/TTCTTTCTTTCTTTCTTTC	TTCTTTCTTTCTTTCTTTC/TTCTTTCTTTCTTTCTTTC	TTCTTTCTTTCTTTCTTTC/TTCTTTCTTTCTTTCTTTC	TTCTTTCTTTCTTTCTTTC/TTCTTTCTTTCTTTCTTTC	TTCTTTCTTTCTTTCTTTC/TTCTTTCTTTCTTTCTTTC	TTCTTTCTTTCTTTCTTTC/TTCTTTCTTTCTTTCTTTC	TTCTTTCTTTCTTTCTTTC/TTCTTTCTTTCTTTCTTTC	TTCTTTCTTTCTTTCTTTC/TTCTTTCTTTCTTTCTTTC	TTCTTTCTTTCTTTCTTTC/TTCTTTCTTTCTTTCTTTCTTTCTTTCTTTCTTTC	TTCTTTCTTTCTTTCTTTC/TTCTTTCTTTCTTTCTTTC	TTCTTTCTTTCTTTCTTTC/TTCTTTCTTTCTTTCTTTC	TTCTTTCTTTCTTTCTTTC/TTCTTTCTTTCTTTCTTTC	TTCTTTCTTTCTTTCTTTC/TTCTTTCTTTCTTTCTTTC	TTCTTTCTTTCTTTCTTTC/TTCTTTCTTTCTTTCTTTC	TTCTTTCTTTCTTTCTTTCTTTCTTTCTTTC/TTCTTTCTTTCTTTCTTTCTTTCTTTCTTTC	TTCTTTCTTTCTTTCTTTC/TTCTTTCTTTCTTTCTTTC	TTCTTTCTTTCTTTCTTTC/TTCTTTCTTTCTTTCTTTC	TTCTTTCTTTCTTTCTTTC/TTCTTTCTTTCTTTCTTTC	TTCTTTCTTTCTTTCTTTC/TTCTTTCTTTCTTTCTTTC
Xunr97	4	65750591	CGCAATCGGCTGCTCGTGCTCGCGTGGCCCCGGATCGCCG	68.407	GCAGAACAAAACGACCGATGAGAAGGAAACAAATTCAGAG	53.679	TCTCTCTCTCTCTCTCTCTCTCTCTCTCTCTCTCTCTCTCTCTCTCTC	TCTCTCTCTCTCTCTCTCTCTCTCTCTCTCTCTCTCTCTCTCTCTCTC;TCTCTCTCTCTCTC;TCTCTCTCTCTCTCTC;TCTCTCTCTCTCTCTCT;TCTCTCTCTCTCTCTCTC;TCTCTCTCTCTCTCTCTCTC;TCTCTCTCTCTCTCTCTCTCTC;TCTCTCTCTCTCTCTCTCTCTCTC;TCTCTCTCTCTCTCTCTCTCTCTCTC;TCTCTCTCTCTCTCTCTCTCTCTCTCTC;TCTCTCTCTCTCTCTCTCTCTCTCTCTCTC;TCTCTCTCTCTCTCTCTCTCTCTCTCTCTCTC;TCTCTCTCTCTCTCTCTCTCTCTCTCTCTCTCTC;TCTCTCTCTCTCTCTCTCTCTCTCTCTCTCTCTCTC;TCTCTCTCTCTCTCTCTCTC…	TCTCTCTCTCTCTCTCTCTC/TCTCTCTCTCTCTCTCTCTCTC	TCTCTCTCTCTCTCTCTCTCTCTCTCTC/TCTCTCTCTCTCTCTCTCTCTCTCTCTCTCTC	TCTCTCTCTCTCTCTCTCTC/TCTCTCTCTCTCTCTCTCTC	TCTCTCTCTCTCTCTCTCTCTCTC/TCTCTCTCTCTCTCTCTCTCTCTCTC	TCTCTCTCTCTCTCTCTCTCTCTCTCTC/TCTCTCTCTCTCTCTCTCTCTCTCTCTCTCTC	TCTCTCTCTCTCTCTCTCTC/TCTCTCTCTCTCTCTCTCTCTCTCTCTCTCTCTC	TCTCTCTCTCTCTCTCTCTCTCTCTCTCTC/TCTCTCTCTCTCTCTCTCTCTCTCTCTCTCTCTC	TCTCTCTCTCTCTCTC/TCTCTCTCTCTCTCTCTC	TCTCTCTCTCTCTCTC/TCTCTCTCTCTCTCTCTC	TCTCTCTCTCTCTCTCTCTCTCTCTCTCTC/TCTCTCTCTCTCTCTCTCTCTCTCTCTCTCTC	TCTCTCTCTCTCTCTCTCTCTCTCTCTCTCTCTCTC/TCTCTCTCTCTCTCTCTCTCTCTCTCTCTCTCTCTCTCTC	TCTCTCTCTCTCTCTCTCTCTCTC/TCTCTCTCTCTCTCTCTCTCTCTCTCTCTCTCTCTCTCTCTCTCTCTC	TCTCTCTCTCTCTCTC/TCTCTCTCTCTCTCTCTC	TCTCTCTCTCTCTCTCTCTCTCTC/TCTCTCTCTCTCTCTCTCTCTCTCTC	./.	TCTCTCTCTCTCTCTCTCTCTCTCTCTCTCTCTCTCTCTCTCTCTC/TCTCTCTCTCTCTCTCTCTCTCTCTCTCTCTCTCTCTCTCTCTCTC	TCTCTCTCTCTCTCTC/TCTCTCTCTCTCTCTCTCTCTCTCTCTCTCTCTC	TCTCTCTCTCTCTCTC/TCTCTCTCTCTCTCTCTC	TCTCTCTCTCTCTCTCTCTCTCTCTCTCTCTCTC/TCTCTCTCTCTCTCTCTCTCTCTCTCTCTCTCTCTCTC	TCTCTCTCTCTCTC/TCTCTCTCTCTCTCTCTCTCTCTCTCTC	TCTCTCTCTCTCTCTCTCTCTC/TCTCTCTCTCTCTCTCTCTCTCTCTCTCTCTCTC	TCTCTCTCTCTCTCTCTCTCTC/TCTCTCTCTCTCTCTCTCTCTCTC	TCTCTCTCTCTCTCTCTCTCTC/TCTCTCTCTCTCTCTCTCTCTCTC	TCTCTCTCTCTCTCTCTCTCTCTCTCTCTCTCTCTCTCTCTCTCTCTC/TCTCTCTCTCTCTCTCTCTCTCTCTCTCTCTCTCTCTCTCTCTCTCTC	./.	TCTCTCTCTCTCTCTCTCTCTCTCTCTCTCTCTCTCTCTCTC/TCTCTCTCTCTCTCTCTCTCTCTCTCTCTCTCTCTCTCTCTCTC	./.	TCTCTCTCTCTCTCTCTCTC/TCTCTCTCTCTCTCTCTCTC	./.	TCTCTCTCTCTCTCTCTCTCTCTCTCTCTCTCTC/TCTCTCTCTCTCTCTCTCTCTCTCTCTCTCTCTCTCTCTCTC	TCTCTCTCTCTCTCTCTCTCTC/TCTCTCTCTCTCTCTCTCTCTCTC	TCTCTCTCTCTCTCTC/TCTCTCTCTCTCTCTCTC	TCTCTCTCTCTCTCTCTCTCTCTCTCTCTCTCTCTCTCTCTCTCTC/TCTCTCTCTCTCTCTCTCTCTCTCTCTCTCTCTCTCTCTCTCTCTC	TCTCTCTCTCTCTCTCTCTCTCTCTC/TCTCTCTCTCTCTCTCTCTCTCTCTC	TCTCTCTCTCTCTCTCTCTC/TCTCTCTCTCTCTCTCTCTCTCTCTCTCTCTCTC	TCTCTCTCTCTCTCTCTCTCTCTCTCTCTCTCTC/TCTCTCTCTCTCTCTCTCTCTCTCTCTCTCTCTCTCTCTCTCTCTCTCTC	TCTCTCTCTCTCTCTCTCTCTC/TCTCTCTCTCTCTCTCTCTCTCTC	TCTCTCTCTCTCTCTCTCTCTCTCTCTCTCTCTCTCTC/TCTCTCTCTCTCTCTCTCTCTCTCTCTCTCTCTCTCTCTCTCTCTCTCTC	TCTCTCTCTCTCTCTCTCTCTCTC/TCTCTCTCTCTCTCTCTCTCTCTCTC	TCTCTCTCTCTCTCTCTC/TCTCTCTCTCTCTCTCTCTC	TCTCTCTCTCTCTCTCTCTC/TCTCTCTCTCTCTCTCTCTCTC
Xunr98	4	66571647	GCGCGGGCGAGGCCGACCGACGGAGGCTCGCGCAGCTGCG	71.55	CAACGTTGTCTCGACTCGACTCTGCCAACGACGTCGACCA	60.397	CCCTGTCCCTGTCCCTGTCCCCGTCCCCGTCCACGTCCCCGCCCCGTC	CCCTGTCCCTGTCCCTGTCCCCGT;CCCTGTCCCTGTCCCTGTCCCCGTCCCCGT;CCCTGTCCCTGTCCCTGTCCCCGTCCCCGTCCACGT;CCCTGTCCCTGTCCCTGTCCCCGTCCCCGTCCACGTCCCCGC;CCCTGTCCCTGTCCCTGTCCCCGTCCCCGTCCACGTCCCCGCCCCGT	CCCTGTCCCTGTCCCTGTCCCCGTCCCCGTCCACGTCCCCGCCCCGTC/CCCTGTCCCTGTCCCTGTCCCCGTCCCCGTCCACGTCCCCGCCCCGTC	CCCTGTCCCTGTCCCTGTCCCCGTCCCCGTCCACGTCCCCGCCCCGTC/CCCTGTCCCTGTCCCTGTCCCCGTCCCCGTCCACGTCCCCGCCCCGTC	CCCTGTCCCTGTCCCTGTCCCCGTCCCCGTCCACGTCCCCGCCCCGTC/CCCTGTCCCTGTCCCTGTCCCCGTCCCCGTCCACGTCCCCGCCCCGTC	CCCTGTCCCTGTCCCTGTCCCCGTCCCCGTCCACGTCCCCGCCCCGTC/CCCTGTCCCTGTCCCTGTCCCCGTCCCCGTCCACGTCCCCGCCCCGTC	CCCTGTCCCTGTCCCTGTCCCCGTCCCCGTCCACGTCCCCGCCCCGTC/CCCTGTCCCTGTCCCTGTCCCCGTCCCCGTCCACGTCCCCGCCCCGTC	CCCTGTCCCTGTCCCTGTCCCCGTCCCCGT/CCCTGTCCCTGTCCCTGTCCCCGTCCCCGT	CCCTGTCCCTGTCCCTGTCCCCGTCCCCGTCCACGTCCCCGCCCCGTC/CCCTGTCCCTGTCCCTGTCCCCGTCCCCGTCCACGTCCCCGCCCCGTC	CCCTGTCCCTGTCCCTGTCCCCGTCCCCGT/CCCTGTCCCTGTCCCTGTCCCCGTCCCCGT	CCCTGTCCCTGTCCCTGTCCCCGTCCCCGTCCACGTCCCCGCCCCGTC/CCCTGTCCCTGTCCCTGTCCCCGTCCCCGTCCACGTCCCCGCCCCGTC	CCCTGTCCCTGTCCCTGTCCCCGTCCCCGT/CCCTGTCCCTGTCCCTGTCCCCGTCCCCGT	CCCTGTCCCTGTCCCTGTCCCCGTCCCCGTCCACGTCCCCGCCCCGTC/CCCTGTCCCTGTCCCTGTCCCCGTCCCCGTCCACGTCCCCGCCCCGTC	CCCTGTCCCTGTCCCTGTCCCCGTCCCCGTCCACGTCCCCGCCCCGTC/CCCTGTCCCTGTCCCTGTCCCCGTCCCCGTCCACGTCCCCGCCCCGTC	CCCTGTCCCTGTCCCTGTCCCCGTCCCCGTCCACGTCCCCGCCCCGTC/CCCTGTCCCTGTCCCTGTCCCCGTCCCCGTCCACGTCCCCGCCCCGTC	CCCTGTCCCTGTCCCTGTCCCCGTCCCCGTCCACGTCCCCGCCCCGTC/CCCTGTCCCTGTCCCTGTCCCCGTCCCCGTCCACGTCCCCGCCCCGTC	CCCTGTCCCTGTCCCTGTCCCCGTCCCCGTCCACGTCCCCGCCCCGTC/CCCTGTCCCTGTCCCTGTCCCCGTCCCCGTCCACGTCCCCGCCCCGTC	CCCTGTCCCTGTCCCTGTCCCCGTCCCCGTCCACGTCCCCGCCCCGTC/CCCTGTCCCTGTCCCTGTCCCCGTCCCCGTCCACGTCCCCGCCCCGTC	CCCTGTCCCTGTCCCTGTCCCCGTCCCCGTCCACGTCCCCGCCCCGTC/CCCTGTCCCTGTCCCTGTCCCCGTCCCCGTCCACGTCCCCGCCCCGTC	CCCTGTCCCTGTCCCTGTCCCCGTCCCCGTCCACGTCCCCGCCCCGTC/CCCTGTCCCTGTCCCTGTCCCCGTCCCCGTCCACGTCCCCGCCCCGTC	CCCTGTCCCTGTCCCTGTCCCCGTCCCCGTCCACGTCCCCGCCCCGTC/CCCTGTCCCTGTCCCTGTCCCCGTCCCCGTCCACGTCCCCGCCCCGTC	CCCTGTCCCTGTCCCTGTCCCCGTCCCCGTCCACGTCCCCGCCCCGTC/CCCTGTCCCTGTCCCTGTCCCCGTCCCCGTCCACGTCCCCGCCCCGTC	CCCTGTCCCTGTCCCTGTCCCCGTCCCCGTCCACGTCCCCGCCCCGTC/CCCTGTCCCTGTCCCTGTCCCCGTCCCCGTCCACGTCCCCGCCCCGTC	CCCTGTCCCTGTCCCTGTCCCCGTCCCCGTCCACGTCCCCGCCCCGTC/CCCTGTCCCTGTCCCTGTCCCCGTCCCCGTCCACGTCCCCGCCCCGTC	CCCTGTCCCTGTCCCTGTCCCCGTCCCCGT/CCCTGTCCCTGTCCCTGTCCCCGTCCCCGT	CCCTGTCCCTGTCCCTGTCCCCGTCCCCGTCCACGTCCCCGCCCCGTC/CCCTGTCCCTGTCCCTGTCCCCGTCCCCGTCCACGTCCCCGCCCCGTC	CCCTGTCCCTGTCCCTGTCCCCGTCCCCGTCCACGTCCCCGCCCCGTC/CCCTGTCCCTGTCCCTGTCCCCGTCCCCGTCCACGTCCCCGCCCCGTC	CCCTGTCCCTGTCCCTGTCCCCGTCCCCGTCCACGTCCCCGCCCCGTC/CCCTGTCCCTGTCCCTGTCCCCGTCCCCGTCCACGTCCCCGCCCCGTC	./.	CCCTGTCCCTGTCCCTGTCCCCGTCCCCGTCCACGTCCCCGCCCCGTC/CCCTGTCCCTGTCCCTGTCCCCGTCCCCGTCCACGTCCCCGCCCCGTC	CCCTGTCCCTGTCCCTGTCCCCGTCCCCGTCCACGTCCCCGCCCCGTC/CCCTGTCCCTGTCCCTGTCCCCGTCCCCGTCCACGTCCCCGCCCCGTC	CCCTGTCCCTGTCCCTGTCCCCGTCCCCGTCCACGTCCCCGCCCCGTC/CCCTGTCCCTGTCCCTGTCCCCGTCCCCGTCCACGTCCCCGCCCCGTC	CCCTGTCCCTGTCCCTGTCCCCGTCCCCGTCCACGTCCCCGCCCCGTC/CCCTGTCCCTGTCCCTGTCCCCGTCCCCGTCCACGTCCCCGCCCCGTC	./.	CCCTGTCCCTGTCCCTGTCCCCGTCCCCGTCCACGTCCCCGCCCCGTC/CCCTGTCCCTGTCCCTGTCCCCGTCCCCGTCCACGTCCCCGCCCCGTC	CCCTGTCCCTGTCCCTGTCCCCGTCCCCGTCCACGTCCCCGCCCCGTC/CCCTGTCCCTGTCCCTGTCCCCGTCCCCGTCCACGTCCCCGCCCCGTC	CCCTGTCCCTGTCCCTGTCCCCGTCCCCGTCCACGTCCCCGCCCCGTC/CCCTGTCCCTGTCCCTGTCCCCGTCCCCGTCCACGTCCCCGCCCCGTC	CCCTGTCCCTGTCCCTGTCCCCGTCCCCGTCCACGTCCCCGCCCCGTC/CCCTGTCCCTGTCCCTGTCCCCGTCCCCGTCCACGTCCCCGCCCCGTC	CCCTGTCCCTGTCCCTGTCCCCGTCCCCGTCCACGTCCCCGCCCCGTC/CCCTGTCCCTGTCCCTGTCCCCGTCCCCGTCCACGTCCCCGCCCCGTC	CCCTGTCCCTGTCCCTGTCCCCGTCCCCGTCCACGTCCCCGCCCCGTC/CCCTGTCCCTGTCCCTGTCCCCGTCCCCGTCCACGTCCCCGCCCCGTC	CCCTGTCCCTGTCCCTGTCCCCGTCCCCGTCCACGTCCCCGCCCCGTC/CCCTGTCCCTGTCCCTGTCCCCGTCCCCGTCCACGTCCCCGCCCCGTC	CCCTGTCCCTGTCCCTGTCCCCGT/CCCTGTCCCTGTCCCTGTCCCCGTCCCCGTCCACGTCCCCGCCCCGTC	CCCTGTCCCTGTCCCTGTCCCCGTCCCCGTCCACGTCCCCGCCCCGTC/CCCTGTCCCTGTCCCTGTCCCCGTCCCCGTCCACGTCCCCGCCCCGTC
Xunr99	5	1905993	AAGGCGCGCTGCCTGATGGGCTGCGGCGGCGGCGGTAGGA	69.8	GGGGGGCTCTTCGTCATCACGTCGGACGCCGCGAAGCTGC	65.558	GACACGACGACGTCGGACGACGACGACGA	GACACGACGACGTCGGACGACGACGA;GACACGACGACGTCGGACGACGACGACGACGA;GACACGACGACGTCGGACGACGACGACGACGACGA;GACACGACGACGTCGGACGACGACGACGACGACGACGA;GACACGACGACGTCGGACGACGACGACGACGACGACGACGA;GACACGACGACGTCGGACGACGACGACGACGACGACGACGACGA;GACACGACGACGTCGGACGACGACGACGACGACGACGACGACGACGA	GACACGACGACGTCGGACGACGACGACGA/GACACGACGACGTCGGACGACGACGACGA	GACACGACGACGTCGGACGACGACGACGA/GACACGACGACGTCGGACGACGACGACGA	GACACGACGACGTCGGACGACGACGACGA/GACACGACGACGTCGGACGACGACGACGA	GACACGACGACGTCGGACGACGACGACGA/GACACGACGACGTCGGACGACGACGACGA	GACACGACGACGTCGGACGACGACGA/GACACGACGACGTCGGACGACGACGA	GACACGACGACGTCGGACGACGACGA/GACACGACGACGTCGGACGACGACGA	GACACGACGACGTCGGACGACGACGACGACGACGACGACGACGACGA/GACACGACGACGTCGGACGACGACGACGACGACGACGACGACGACGA	./.	GACACGACGACGTCGGACGACGACGACGA/GACACGACGACGTCGGACGACGACGACGA	./.	GACACGACGACGTCGGACGACGACGACGA/GACACGACGACGTCGGACGACGACGACGA	GACACGACGACGTCGGACGACGACGACGA/GACACGACGACGTCGGACGACGACGACGA	./.	GACACGACGACGTCGGACGACGACGACGACGACGACGACGACGA/GACACGACGACGTCGGACGACGACGACGACGACGACGACGACGACGA	GACACGACGACGTCGGACGACGACGACGA/GACACGACGACGTCGGACGACGACGACGA	GACACGACGACGTCGGACGACGACGACGA/GACACGACGACGTCGGACGACGACGACGA	GACACGACGACGTCGGACGACGACGACGA/GACACGACGACGTCGGACGACGACGACGA	GACACGACGACGTCGGACGACGACGACGA/GACACGACGACGTCGGACGACGACGACGA	./.	GACACGACGACGTCGGACGACGACGACGA/GACACGACGACGTCGGACGACGACGACGA	GACACGACGACGTCGGACGACGACGACGA/GACACGACGACGTCGGACGACGACGACGA	GACACGACGACGTCGGACGACGACGACGA/GACACGACGACGTCGGACGACGACGACGA	GACACGACGACGTCGGACGACGACGA/GACACGACGACGTCGGACGACGACGA	GACACGACGACGTCGGACGACGACGACGA/GACACGACGACGTCGGACGACGACGACGA	./.	GACACGACGACGTCGGACGACGACGACGA/GACACGACGACGTCGGACGACGACGACGA	GACACGACGACGTCGGACGACGACGACGA/GACACGACGACGTCGGACGACGACGACGA	./.	GACACGACGACGTCGGACGACGACGACGA/GACACGACGACGTCGGACGACGACGACGA	GACACGACGACGTCGGACGACGACGACGA/GACACGACGACGTCGGACGACGACGACGA	GACACGACGACGTCGGACGACGACGA/GACACGACGACGTCGGACGACGACGA	./.	GACACGACGACGTCGGACGACGACGA/GACACGACGACGTCGGACGACGACGA	GACACGACGACGTCGGACGACGACGACGA/GACACGACGACGTCGGACGACGACGACGA	GACACGACGACGTCGGACGACGACGACGA/GACACGACGACGTCGGACGACGACGACGA	GACACGACGACGTCGGACGACGACGACGA/GACACGACGACGTCGGACGACGACGACGA	GACACGACGACGTCGGACGACGACGACGA/GACACGACGACGTCGGACGACGACGACGA	GACACGACGACGTCGGACGACGACGACGA/GACACGACGACGTCGGACGACGACGACGA	GACACGACGACGTCGGACGACGACGACGACGACGACGACGACGACGA/GACACGACGACGTCGGACGACGACGACGACGACGACGACGACGACGA	GACACGACGACGTCGGACGACGACGACGACGACGACGACGACGACGA/GACACGACGACGTCGGACGACGACGACGACGACGACGACGACGACGA	GACACGACGACGTCGGACGACGACGACGA/GACACGACGACGTCGGACGACGACGACGA
Xunr100	5	2861571	TGAGGACGAGGAAGAGGAGGACGAGGAGTAGCACAAGGAC	58.467	TTGTGGGACCTCGCAAGTAGATACCCGAGACCGCCAGAGG	60.301	AGGATGAGGAGGAGGAGGAGGAGGAGGAGG	AGGATGA;AGGATGAGGAGGAGGAGGAGGAGG;AGGATGAGGAGGAGGAGGAGGAGGAGG;AGGATGAGGAGGAGGAGGAGGAGGAGGAGGAGG;AGGATGAGGAGGAGGAGGAGGAGGAGGAGGAGGAGG;AGGATGAGGAGGAGGAGGAGGAGGAGGAGGAGGAGGAG;AGGATGAGGAGGAGGAGGAGGAGGAGGAGGAGGAGGAGG;AGGATGAGGAGGAGGAGGAGGAGGAGGAGGAGGAGGAGGAG;AGGATGAGGAGGAGGAGGAGGAGGAGGAGGAGGAGGAGGAGG;AGGATGAGGAGGAGGAGGAGGAGGAGGAGGAGGAGGAGGAGGAGGAGG	AGGATGAGGAGGAGGAGGAGGAGGAGGAGGAGGAGGAGGAGG/AGGATGAGGAGGAGGAGGAGGAGGAGGAGGAGGAGGAGGAGG	AGGATGAGGAGGAGGAGGAGGAGGAGGAGG/AGGATGAGGAGGAGGAGGAGGAGGAGGAGGAGG	AGGATGAGGAGGAGGAGGAGGAGGAGGAGGAGGAGG/AGGATGAGGAGGAGGAGGAGGAGGAGGAGGAGGAGGAGG	AGGATGAGGAGGAGGAGGAGGAGGAGG/AGGATGAGGAGGAGGAGGAGGAGGAGG	AGGATGAGGAGGAGGAGGAGGAGGAGG/AGGATGAGGAGGAGGAGGAGGAGGAGG	AGGATGAGGAGGAGGAGGAGGAGGAGG/AGGATGAGGAGGAGGAGGAGGAGGAGG	AGGATGAGGAGGAGGAGGAGGAGGAGGAGG/AGGATGAGGAGGAGGAGGAGGAGGAGGAGG	AGGATGAGGAGGAGGAGGAGGAGGAGGAGGAGG/AGGATGAGGAGGAGGAGGAGGAGGAGGAGGAGGAGG	AGGATGAGGAGGAGGAGGAGGAGGAGGAGG/AGGATGAGGAGGAGGAGGAGGAGGAGGAGG	AGGATGAGGAGGAGGAGGAGGAGGAGG/AGGATGAGGAGGAGGAGGAGGAGGAGG	AGGATGAGGAGGAGGAGGAGGAGG/AGGATGAGGAGGAGGAGGAGGAGGAGG	AGGATGAGGAGGAGGAGGAGGAGGAGGAGGAGGAGG/AGGATGAGGAGGAGGAGGAGGAGGAGGAGGAGGAGGAGG	AGGATGAGGAGGAGGAGGAGGAGGAGGAGGAGGAGG/AGGATGAGGAGGAGGAGGAGGAGGAGGAGGAGGAGGAGG	AGGATGAGGAGGAGGAGGAGGAGG/AGGATGAGGAGGAGGAGGAGGAGGAGGAGG	AGGATGAGGAGGAGGAGGAGGAGG/AGGATGAGGAGGAGGAGGAGGAGGAGG	AGGATGAGGAGGAGGAGGAGGAGGAGGAGG/AGGATGAGGAGGAGGAGGAGGAGGAGGAGGAGGAGGAGG	AGGATGAGGAGGAGGAGGAGGAGGAGG/AGGATGAGGAGGAGGAGGAGGAGGAGGAGG	AGGATGAGGAGGAGGAGGAGGAGGAGG/AGGATGAGGAGGAGGAGGAGGAGGAGGAGG	AGGATGAGGAGGAGGAGGAGGAGG/AGGATGAGGAGGAGGAGGAGGAGG	AGGATGAGGAGGAGGAGGAGGAGGAGGAGG/AGGATGAGGAGGAGGAGGAGGAGGAGGAGG	AGGATGAGGAGGAGGAGGAGGAGGAGGAGG/AGGATGAGGAGGAGGAGGAGGAGGAGGAGG	AGGATGAGGAGGAGGAGGAGGAGGAGGAGG/AGGATGAGGAGGAGGAGGAGGAGGAGGAGG	AGGATGAGGAGGAGGAGGAGGAGGAGG/AGGATGAGGAGGAGGAGGAGGAGGAGG	AGGATGAGGAGGAGGAGGAGGAGGAGGAGGAGGAGG/AGGATGAGGAGGAGGAGGAGGAGGAGGAGGAGGAGGAGG	AGGATGAGGAGGAGGAGGAGGAGGAGG/AGGATGAGGAGGAGGAGGAGGAGGAGGAGG	AGGATGAGGAGGAGGAGGAGGAGGAGG/AGGATGAGGAGGAGGAGGAGGAGGAGG	AGGATGAGGAGGAGGAGGAGGAGGAGG/AGGATGAGGAGGAGGAGGAGGAGGAGG	AGGATGAGGAGGAGGAGGAGGAGGAGGAGGAGG/AGGATGAGGAGGAGGAGGAGGAGGAGGAGGAGGAGGAGG	AGGATGAGGAGGAGGAGGAGGAGGAGGAGG/AGGATGAGGAGGAGGAGGAGGAGGAGGAGGAGGAGGAGGAGG	AGGATGAGGAGGAGGAGGAGGAGGAGG/AGGATGAGGAGGAGGAGGAGGAGGAGGAGG	AGGATGAGGAGGAGGAGGAGGAGGAGG/AGGATGAGGAGGAGGAGGAGGAGGAGGAGG	AGGATGAGGAGGAGGAGGAGGAGGAGGAGGAGG/AGGATGAGGAGGAGGAGGAGGAGGAGGAGGAGGAGG	AGGATGAGGAGGAGGAGGAGGAGG/AGGATGAGGAGGAGGAGGAGGAGGAGG	AGGATGAGGAGGAGGAGGAGGAGGAGGAGGAGGAGG/AGGATGAGGAGGAGGAGGAGGAGGAGGAGGAGGAGGAGG	AGGATGAGGAGGAGGAGGAGGAGGAGGAGG/AGGATGAGGAGGAGGAGGAGGAGGAGGAGG	AGGATGAGGAGGAGGAGGAGGAGGAGGAGGAGGAGG/AGGATGAGGAGGAGGAGGAGGAGGAGGAGGAGGAGGAGG	./.	AGGATGAGGAGGAGGAGGAGGAGGAGGAGGAGGAGG/AGGATGAGGAGGAGGAGGAGGAGGAGGAGGAGGAGGAGG	./.	AGGATGAGGAGGAGGAGGAGGAGGAGG/AGGATGAGGAGGAGGAGGAGGAGGAGGAGG	AGGATGAGGAGGAGGAGGAGGAGGAGG/AGGATGAGGAGGAGGAGGAGGAGGAGG
Xunr101	5	61825120	CACTGCTAACCAAACAATCTCAAACACAACATGGACTCTC	53.282	CCCCACAAGAGCGCATTGTTTTCATTTCTTATCAGACTGC	54.876	CGCCACGCCACGCCACGCCACGCCA	CGCCACGCCACGCCA;CGCCACGCCACGCCACGCCA;CGCCACGCCACGCCACGCCACGCCACGCCA;CGCCACGCCACGCCACGCCACGCCACGCCACGCCA;CGCCACGCCACGCCACGCCACGCCACGCCACGCCACGCCA	./.	CGCCACGCCACGCCA/CGCCACGCCACGCCA	CGCCACGCCACGCCA/CGCCACGCCACGCCA	CGCCACGCCACGCCACGCCACGCCA/CGCCACGCCACGCCACGCCACGCCA	CGCCACGCCACGCCACGCCACGCCA/CGCCACGCCACGCCACGCCACGCCA	CGCCACGCCACGCCACGCCACGCCA/CGCCACGCCACGCCACGCCACGCCA	./.	CGCCACGCCACGCCACGCCACGCCA/CGCCACGCCACGCCACGCCACGCCA	CGCCACGCCACGCCACGCCACGCCA/CGCCACGCCACGCCACGCCACGCCA	./.	CGCCACGCCACGCCACGCCACGCCACGCCACGCCA/CGCCACGCCACGCCACGCCACGCCACGCCACGCCA	CGCCACGCCACGCCACGCCACGCCA/CGCCACGCCACGCCACGCCACGCCACGCCACGCCA	CGCCACGCCACGCCACGCCACGCCA/CGCCACGCCACGCCACGCCACGCCA	CGCCACGCCACGCCACGCCACGCCA/CGCCACGCCACGCCACGCCACGCCA	./.	CGCCACGCCACGCCACGCCACGCCACGCCACGCCA/CGCCACGCCACGCCACGCCACGCCACGCCACGCCA	CGCCACGCCACGCCACGCCACGCCACGCCACGCCA/CGCCACGCCACGCCACGCCACGCCACGCCACGCCA	CGCCACGCCACGCCACGCCA/CGCCACGCCACGCCACGCCA	CGCCACGCCACGCCACGCCACGCCACGCCACGCCA/CGCCACGCCACGCCACGCCACGCCACGCCACGCCA	CGCCACGCCACGCCACGCCACGCCACGCCACGCCA/CGCCACGCCACGCCACGCCACGCCACGCCACGCCA	CGCCACGCCACGCCACGCCACGCCACGCCACGCCA/CGCCACGCCACGCCACGCCACGCCACGCCACGCCA	CGCCACGCCACGCCACGCCACGCCA/CGCCACGCCACGCCACGCCACGCCA	CGCCACGCCACGCCACGCCACGCCA/CGCCACGCCACGCCACGCCACGCCA	./.	CGCCACGCCACGCCACGCCACGCCA/CGCCACGCCACGCCACGCCACGCCA	CGCCACGCCACGCCACGCCACGCCACGCCACGCCA/CGCCACGCCACGCCACGCCACGCCACGCCACGCCA	CGCCACGCCACGCCACGCCACGCCACGCCACGCCA/CGCCACGCCACGCCACGCCACGCCACGCCACGCCA	./.	CGCCACGCCACGCCACGCCACGCCACGCCACGCCA/CGCCACGCCACGCCACGCCACGCCACGCCACGCCA	CGCCACGCCACGCCACGCCACGCCACGCCACGCCA/CGCCACGCCACGCCACGCCACGCCACGCCACGCCA	./.	./.	./.	CGCCACGCCACGCCACGCCACGCCACGCCACGCCA/CGCCACGCCACGCCACGCCACGCCACGCCACGCCA	CGCCACGCCACGCCACGCCACGCCACGCCACGCCA/CGCCACGCCACGCCACGCCACGCCACGCCACGCCA	CGCCACGCCACGCCACGCCACGCCACGCCACGCCA/CGCCACGCCACGCCACGCCACGCCACGCCACGCCA	CGCCACGCCACGCCACGCCACGCCACGCCA/CGCCACGCCACGCCACGCCACGCCACGCCA	CGCCACGCCACGCCACGCCACGCCACGCCACGCCA/CGCCACGCCACGCCACGCCACGCCACGCCACGCCA	CGCCACGCCACGCCACGCCACGCCA/CGCCACGCCACGCCACGCCACGCCA	CGCCACGCCACGCCACGCCACGCCA/CGCCACGCCACGCCACGCCACGCCA	CGCCACGCCACGCCACGCCACGCCA/CGCCACGCCACGCCACGCCACGCCA
Xunr102	5	63471515	TTTGATTTGTTAACTAATACCCGATCACCCCGTGCATCTC	53.501	TTCTATAGTACAGAATGAACCTCTCGATTCCAATAATGTG	49.038	ATATATATATATATAT	ATATATAT;ATATATATAT;ATATATATATAT;ATATATATATATAT;ATATATATATATATATAT;ATATATATATATATATATAT;ATATATATATATATATATATAT;ATATATATATATATATATATATAT	ATATATATAT/ATATATATAT	ATATATATATATAT/ATATATATATATAT	ATATATATATATATAT/ATATATATATATATATAT	ATATATATATAT/ATATATATATAT	ATATATATATATAT/ATATATATATATATAT	ATATATATATATAT/ATATATATATATATAT	ATATATATATAT/ATATATATATAT	ATATATATATATATAT/ATATATATATATATAT	ATATATATATATAT/ATATATATATATATAT	ATATATATATATAT/ATATATATATATATAT	ATATATATATATAT/ATATATATATATATAT	ATATATATATATATAT/ATATATATATATATATAT	ATATATATATATAT/ATATATATATATATAT	ATATATATATAT/ATATATATATAT	ATATATATATATATAT/ATATATATATATATATAT	ATATATATATATATATAT/ATATATATATATATATAT	ATATATATATAT/ATATATATATATAT	./.	ATATATATATATAT/ATATATATATATATAT	ATATATATATATAT/ATATATATATATAT	ATATATATATATAT/ATATATATATATATAT	ATATATATATATATAT/ATATATATATATATAT	ATATATATATATAT/ATATATATATATATAT	ATATATATATATAT/ATATATATATATATAT	ATATATATATATATAT/ATATATATATATATAT	ATATATATATATAT/ATATATATATATATAT	ATATATATATATATAT/ATATATATATATATAT	ATATATATATATATAT/ATATATATATATATATAT	ATATATATATATATAT/ATATATATATATATAT	ATATATATATATATAT/ATATATATATATATATAT	ATATATATATAT/ATATATATATATAT	ATATATATATATATAT/ATATATATATATATAT	./.	ATATATATATATAT/ATATATATATATATATAT	ATATATATATATAT/ATATATATATATAT	ATATATATATATATAT/ATATATATATATATATAT	./.	ATATATATATATATAT/ATATATATATATATATAT	ATATATATAT/ATATATATATAT	ATATATATATAT/ATATATATATAT	ATATATATATATAT/ATATATATATATATAT
Xunr103	5	64101957	TCCTCGTCGGCCCCGACGATGATGATAACGCGCTGAAGAT	60.876	TGCCCATGGGCGGTTCCGCCTCTCCGACGACGCGCCTTGC	67.714	CGACGACGACGGCGGCGACGGCGACGGCGACGGCGACG	CGACGACGACGGCGGCGACGGCG;CGACGACGACGGCGGCGACGGCGACG;CGACGACGACGGCGGCGACGGCGACGGCG;CGACGACGACGGCGGCGACGGCGACGGCGACG;CGACGACGACGGCGGCGACGGCGACGGCGACGGCG;CGACGACGACGGCGGCGACGGCGACGGCGACGGCGACGACGACG	CGACGACGACGGCGGCGACGGCGACGGCGACGGCGACGACGACG/CGACGACGACGGCGGCGACGGCGACGGCGACGGCGACGACGACG	CGACGACGACGGCGGCGACGGCGACGGCGACGGCGACG/CGACGACGACGGCGGCGACGGCGACGGCGACGGCGACG	CGACGACGACGGCGGCGACGGCGACGGCGACGGCGACG/CGACGACGACGGCGGCGACGGCGACGGCGACGGCGACG	CGACGACGACGGCGGCGACGGCGACG/CGACGACGACGGCGGCGACGGCGACG	CGACGACGACGGCGGCGACGGCGACGGCGACGGCGACG/CGACGACGACGGCGGCGACGGCGACGGCGACGGCGACG	CGACGACGACGGCGGCGACGGCGACGGCGACGGCGACG/CGACGACGACGGCGGCGACGGCGACGGCGACGGCGACG	CGACGACGACGGCGGCGACGGCGACGGCGACGGCGACG/CGACGACGACGGCGGCGACGGCGACGGCGACGGCGACG	CGACGACGACGGCGGCGACGGCGACGGCGACGGCGACG/CGACGACGACGGCGGCGACGGCGACGGCGACGGCGACG	CGACGACGACGGCGGCGACGGCG/CGACGACGACGGCGGCGACGGCGACGGCGACGGCGACG	./.	CGACGACGACGGCGGCGACGGCGACGGCGACGGCGACG/CGACGACGACGGCGGCGACGGCGACGGCGACGGCGACG	CGACGACGACGGCGGCGACGGCGACGGCGACGGCGACG/CGACGACGACGGCGGCGACGGCGACGGCGACGGCGACG	CGACGACGACGGCGGCGACGGCGACGGCGACGGCGACG/CGACGACGACGGCGGCGACGGCGACGGCGACGGCGACG	CGACGACGACGGCGGCGACGGCGACGGCGACGGCGACG/CGACGACGACGGCGGCGACGGCGACGGCGACGGCGACG	CGACGACGACGGCGGCGACGGCGACGGCGACGGCGACG/CGACGACGACGGCGGCGACGGCGACGGCGACGGCGACG	CGACGACGACGGCGGCGACGGCGACGGCGACGGCGACG/CGACGACGACGGCGGCGACGGCGACGGCGACGGCGACG	CGACGACGACGGCGGCGACGGCGACGGCGACGGCGACG/CGACGACGACGGCGGCGACGGCGACGGCGACGGCGACG	CGACGACGACGGCGGCGACGGCGACGGCGACGGCGACG/CGACGACGACGGCGGCGACGGCGACGGCGACGGCGACG	CGACGACGACGGCGGCGACGGCGACGGCGACGGCGACG/CGACGACGACGGCGGCGACGGCGACGGCGACGGCGACG	CGACGACGACGGCGGCGACGGCGACGGCGACGGCGACG/CGACGACGACGGCGGCGACGGCGACGGCGACGGCGACG	CGACGACGACGGCGGCGACGGCGACGGCGACGGCGACG/CGACGACGACGGCGGCGACGGCGACGGCGACGGCGACG	CGACGACGACGGCGGCGACGGCG/CGACGACGACGGCGGCGACGGCG	CGACGACGACGGCGGCGACGGCG/CGACGACGACGGCGGCGACGGCG	CGACGACGACGGCGGCGACGGCGACGGCGACGGCGACG/CGACGACGACGGCGGCGACGGCGACGGCGACGGCGACG	CGACGACGACGGCGGCGACGGCGACGGCGACGGCGACG/CGACGACGACGGCGGCGACGGCGACGGCGACGGCGACG	CGACGACGACGGCGGCGACGGCGACGGCGACGGCGACG/CGACGACGACGGCGGCGACGGCGACGGCGACGGCGACG	CGACGACGACGGCGGCGACGGCGACGGCGACGGCGACG/CGACGACGACGGCGGCGACGGCGACGGCGACGGCGACG	CGACGACGACGGCGGCGACGGCGACGGCGACGGCGACG/CGACGACGACGGCGGCGACGGCGACGGCGACGGCGACG	CGACGACGACGGCGGCGACGGCGACGGCGACGGCGACG/CGACGACGACGGCGGCGACGGCGACGGCGACGGCGACG	CGACGACGACGGCGGCGACGGCGACGGCGACGGCGACG/CGACGACGACGGCGGCGACGGCGACGGCGACGGCGACG	CGACGACGACGGCGGCGACGGCGACGGCGACGGCGACG/CGACGACGACGGCGGCGACGGCGACGGCGACGGCGACG	./.	CGACGACGACGGCGGCGACGGCGACGGCGACGGCGACG/CGACGACGACGGCGGCGACGGCGACGGCGACGGCGACG	CGACGACGACGGCGGCGACGGCGACGGCGACGGCGACG/CGACGACGACGGCGGCGACGGCGACGGCGACGGCGACG	CGACGACGACGGCGGCGACGGCGACGGCGACGGCGACG/CGACGACGACGGCGGCGACGGCGACGGCGACGGCGACG	CGACGACGACGGCGGCGACGGCGACGGCGACGGCGACG/CGACGACGACGGCGGCGACGGCGACGGCGACGGCGACG	CGACGACGACGGCGGCGACGGCGACGGCGACGGCGACG/CGACGACGACGGCGGCGACGGCGACGGCGACGGCGACG	CGACGACGACGGCGGCGACGGCGACGGCGACGGCGACG/CGACGACGACGGCGGCGACGGCGACGGCGACGGCGACG	CGACGACGACGGCGGCGACGGCGACGGCGACGGCGACG/CGACGACGACGGCGGCGACGGCGACGGCGACGGCGACG	CGACGACGACGGCGGCGACGGCGACGGCGACGGCGACG/CGACGACGACGGCGGCGACGGCGACGGCGACGGCGACG	./.
Xunr104	5	65634798	CGGGAGCTAATGTTCACATTGGACATAGTGGGTTTGTAAC	53.94	ACATCAAACCTATCTCCAAACTTTATGCAAAGCTGACTTG	51.755	ATTAGATTAGATTAGATTAGATTAGATTAGATTAG	ATTAGATTAGATTAGATTAGAT;ATTAGATTAGATTAGATTAGATT;ATTAGATTAGATTAGATTAGATTAG	./.	ATTAGATTAGATTAGATTAGATTAG/ATTAGATTAGATTAGATTAGATTAG	./.	./.	ATTAGATTAGATTAGATTAGATTAGATTAGATTAG/ATTAGATTAGATTAGATTAGATTAGATTAGATTAG	./.	./.	./.	./.	./.	./.	ATTAGATTAGATTAGATTAGATT/ATTAGATTAGATTAGATTAGATTAGATTAGATTAG	./.	ATTAGATTAGATTAGATTAGATTAG/ATTAGATTAGATTAGATTAGATTAG	./.	./.	./.	ATTAGATTAGATTAGATTAGATTAGATTAGATTAG/ATTAGATTAGATTAGATTAGATTAGATTAGATTAG	./.	./.	./.	./.	ATTAGATTAGATTAGATTAGATT/ATTAGATTAGATTAGATTAGATTAG	./.	./.	./.	./.	./.	./.	ATTAGATTAGATTAGATTAGATTAGATTAGATTAG/ATTAGATTAGATTAGATTAGATTAGATTAGATTAG	./.	./.	./.	./.	./.	./.	./.	ATTAGATTAGATTAGATTAGATTAG/ATTAGATTAGATTAGATTAGATTAG	./.	./.	./.
Xunr105	5	68528303	CTGCGCGTGGGGCCAGGAGGGGTCCTCGCTCTCCGTGTCG	66.885	GGAGGACTGTACTGTGTGTGGGACCGTCTGTCTGTGGTAG	58.134	CTGGGCTGGGCTGGGCTGG	CTGGGCTGG;CTGGGCTGGGCTGG;CTGGGCTGGGCTGGGC;CTGGGCTGGGCTGGGCTGGGCTG;CTGGGCTGGGCTGGGCTGGGCTGG;CTGGGCTGGGCTGGGCTGGGCTGGGCTGG	CTGGGCTGGGCTGGGCTGG/CTGGGCTGGGCTGGGCTGG	CTGGGCTGGGCTGGGCTGG/CTGGGCTGGGCTGGGCTGG	CTGGGCTGGGCTGGGCTGGGCTGGGCTGG/CTGGGCTGGGCTGGGCTGGGCTGGGCTGG	CTGGGCTGGGCTGGGCTGG/CTGGGCTGGGCTGGGCTGG	CTGGGCTGGGCTGGGCTGGGCTGG/CTGGGCTGGGCTGGGCTGGGCTGG	CTGGGCTGGGCTGGGCTGG/CTGGGCTGGGCTGGGCTGG	CTGGGCTGGGCTGGGCTGG/CTGGGCTGGGCTGGGCTGG	CTGGGCTGGGCTGGGCTGGGCTG/CTGGGCTGGGCTGGGCTGGGCTGG	CTGGGCTGGGCTGGGCTGG/CTGGGCTGGGCTGGGCTGG	CTGGGCTGGGCTGGGCTGG/CTGGGCTGGGCTGGGCTGG	CTGGGCTGGGCTGGGCTGG/CTGGGCTGGGCTGGGCTGG	CTGGGCTGGGCTGGGCTGG/CTGGGCTGGGCTGGGCTGG	CTGGGCTGGGCTGGGCTGGGCTG/CTGGGCTGGGCTGGGCTGGGCTGG	CTGGGCTGGGCTGGGCTGG/CTGGGCTGGGCTGGGCTGG	CTGGGCTGGGCTGGGCTGG/CTGGGCTGGGCTGGGCTGGGCTGG	CTGGGCTGGGCTGGGCTGG/CTGGGCTGGGCTGGGCTGG	CTGGGCTGGGCTGGGCTGG/CTGGGCTGGGCTGGGCTGG	CTGGGCTGGGCTGGGCTGG/CTGGGCTGGGCTGGGCTGG	CTGGGCTGGGCTGGGCTGGGCTGGGCTGG/CTGGGCTGGGCTGGGCTGGGCTGGGCTGG	CTGGGCTGGGCTGGGCTGG/CTGGGCTGGGCTGGGCTGG	CTGGGCTGGGCTGGGCTGG/CTGGGCTGGGCTGGGCTGG	CTGGGCTGGGCTGGGCTGG/CTGGGCTGGGCTGGGCTGG	CTGGGCTGGGCTGGGCTGG/CTGGGCTGGGCTGGGCTGG	CTGGGCTGGGCTGGGCTGGGCTGGGCTGG/CTGGGCTGGGCTGGGCTGGGCTGGGCTGG	CTGGGCTGGGCTGGGCTGG/CTGGGCTGGGCTGGGCTGG	CTGGGCTGGGCTGGGCTGG/CTGGGCTGGGCTGGGCTGG	CTGGGCTGGGCTGGGCTGG/CTGGGCTGGGCTGGGCTGG	CTGGGCTGGGCTGGGCTGG/CTGGGCTGGGCTGGGCTGG	CTGGGCTGGGCTGGGCTGG/CTGGGCTGGGCTGGGCTGG	CTGGGCTGGGCTGGGCTGG/CTGGGCTGGGCTGGGCTGG	CTGGGCTGGGCTGGGCTGG/CTGGGCTGGGCTGGGCTGG	CTGGGCTGGGCTGGGCTGG/CTGGGCTGGGCTGGGCTGGGCTGG	CTGGGCTGGGCTGGGCTGG/CTGGGCTGGGCTGGGCTGG	CTGGGCTGGGCTGGGCTGG/CTGGGCTGGGCTGGGCTGG	CTGGGCTGGGCTGGGCTGGGCTGGGCTGG/CTGGGCTGGGCTGGGCTGGGCTGGGCTGG	CTGGGCTGGGCTGGGCTGGGCTGGGCTGG/CTGGGCTGGGCTGGGCTGGGCTGGGCTGG	./.	CTGGGCTGGGCTGGGCTGG/CTGGGCTGGGCTGGGCTGG	CTGGGCTGGGCTGGGCTGG/CTGGGCTGGGCTGGGCTGG	CTGGGCTGG/CTGGGCTGGGCTGGGCTGG	CTGGGCTGGGCTGGGCTGG/CTGGGCTGGGCTGGGCTGG
Xunr106	5	68537719	TTAGGAGAAATATAACGACATCTGTCAGTTTGAATCATTG	48.748	CTTTTCTAACTTTTGTCATGTTTATAGAAAAATATAATGC	44.515	GAGAGAGAGAGAGA	GAGAGAGAGAGA;GAGAGAGAGAGAGAGA;GAGAGAGAGAGAGAGAGA;GAGAGAGAGAGAGAGAGAGA;GAGAGAGAGAGAGAGAGAGAGA;GAGAGAGAGAGAGAGAGAGAGAGAGA;GAGAGAGAGAGAGAGAGAGAGAGAGAGA;GAGAGAGAGAGAGAGAGAGAGAGAGAGAGA;GAGAGAGAGAGAGAGAGAGAGAGAGAGAGAGA;GAGAGAGAGAGAGAGAGAGAGAGAGAGAGAGAGA;GAGAGAGAGAGAGAGAGAGAGAGAGAGAGAGAGAGA;GAGAGAGAGAGAGAGAGAGAGAGAGAGAGAGAGAGAGA;GAGAGAGAGAGAGAGAGAGAGAGAGAGAGAGAGAGAGAGAGA;GAGAGAGAGAGAGAGAGAGAGAGAGAGAGAGA…	GAGAGAGAGAGAGA/GAGAGAGAGAGAGA	GAGAGAGAGAGAGA/GAGAGAGAGAGAGAGAGAGAGAGAGAGA	GAGAGAGAGAGAGA/GAGAGAGAGAGAGA	GAGAGAGAGAGA/GAGAGAGAGAGAGA	GAGAGAGAGAGA/GAGAGAGAGAGAGA	GAGAGAGAGAGA/GAGAGAGAGAGAGA	GAGAGAGAGAGA/GAGAGAGAGAGAGA	GAGAGAGAGAGAGAGAGAGAGAGAGAGAGAGAGAGAGA/GAGAGAGAGAGAGAGAGAGAGAGAGAGAGAGAGAGAGA	GAGAGAGAGAGAGA/GAGAGAGAGAGAGA	GAGAGAGAGAGAGA/GAGAGAGAGAGAGA	GAGAGAGAGAGAGA/GAGAGAGAGAGAGA	GAGAGAGAGAGAGA/GAGAGAGAGAGAGA	GAGAGAGAGAGAGAGAGAGAGAGAGAGAGAGAGAGAGA/GAGAGAGAGAGAGAGAGAGAGAGAGAGAGAGAGAGAGAGAGA	GAGAGAGAGAGA/GAGAGAGAGAGAGA	GAGAGAGAGAGAGAGA/GAGAGAGAGAGAGAGAGA	GAGAGAGAGAGA/GAGAGAGAGAGAGA	GAGAGAGAGAGAGA/GAGAGAGAGAGAGA	GAGAGAGAGAGA/GAGAGAGAGAGAGA	GAGAGAGAGAGA/GAGAGAGAGAGAGA	GAGAGAGAGAGAGA/GAGAGAGAGAGAGAGAGAGAGAGAGAGAGA	GAGAGAGAGAGAGA/GAGAGAGAGAGAGA	GAGAGAGAGAGAGA/GAGAGAGAGAGAGA	GAGAGAGAGAGA/GAGAGAGAGAGAGA	GAGAGAGAGAGAGA/GAGAGAGAGAGAGAGAGAGAGAGAGAGAGAGAGAGAGA	GAGAGAGAGAGA/GAGAGAGAGAGAGA	GAGAGAGAGAGA/GAGAGAGAGAGAGA	GAGAGAGAGAGAGA/GAGAGAGAGAGAGA	GAGAGAGAGAGAGA/GAGAGAGAGAGAGA	GAGAGAGAGAGAGA/GAGAGAGAGAGAGA	GAGAGAGAGAGAGA/GAGAGAGAGAGAGA	GAGAGAGAGAGAGA/GAGAGAGAGAGAGA	./.	GAGAGAGAGAGA/GAGAGAGAGAGAGA	GAGAGAGAGAGAGA/GAGAGAGAGAGAGA	GAGAGAGAGAGAGA/GAGAGAGAGAGAGA	GAGAGAGAGAGAGA/GAGAGAGAGAGAGA	GAGAGAGAGAGAGAGAGAGAGAGAGAGA/GAGAGAGAGAGAGAGAGAGAGAGAGAGA	GAGAGAGAGAGA/GAGAGAGAGAGAGA	GAGAGAGAGAGA/GAGAGAGAGAGAGA	GAGAGAGAGAGAGA/GAGAGAGAGAGAGAGAGAGAGAGAGAGAGAGAGA	GAGAGAGAGAGAGA/GAGAGAGAGAGAGA
Xunr107	5	68650417	TCGGAGCCCACGCACGCAGTTCATCAGACTGGGGGAGACC	63.212	CCGCCGCTGCGTCCCTGGAGGACCAGCCACTCATCGGTCA	65.584	AGAGAGAGAGAGAGAGAGAGAGAGAGAGAGAGAGAGAGAGAGAG	AGAGAGAGAGAGAGAGAGAGAGAGAGAGAGAGAGAGAGAGAGAG;AGAGAGAGAGAGAG;AGAGAGAGAGAGAGAG;AGAGAGAGAGAGAGAGAG;AGAGAGAGAGAGAGAGAGAG;AGAGAGAGAGAGAGAGAGAGA;AGAGAGAGAGAGAGAGAGAGAG;AGAGAGAGAGAGAGAGAGAGAGAG;AGAGAGAGAGAGAGAGAGAGAGAGAG;AGAGAGAGAGAGAGAGAGAGAGAGAGAG;AGAGAGAGAGAGAGAGAGAGAGAGAGAGAG;AGAGAGAGAGAGAGAGAGAGAGAGAGAGAGAG;AGAGAGAGAGAGAGAGAGAGAGAGAGAGAGAGAG;AGAGAGAGAGAGAGAGAGAGAGAGAGAGAGAGAGAG;AGAGAGAGAGAGAGAGAGAG…	./.	AGAGAGAGAGAGAGAGAGAGAGAGAGAG/AGAGAGAGAGAGAGAGAGAGAGAGAGAGAGAGAG	AGAGAGAGAGAGAGAGAGAGAGAGAGAGAGAGAGAGAGAGAG/AGAGAGAGAGAGAGAGAGAGAGAGAGAGAGAGAGAGAGAGAG	AGAGAGAGAGAGAGAGAGAGAGAGAGAGAGAGAGAGAGAG/AGAGAGAGAGAGAGAGAGAGAGAGAGAGAGAGAGAGAGAGAGAG	AGAGAGAGAGAGAGAGAGAGAGAGAGAGAGAGAGAGAGAG/AGAGAGAGAGAGAGAGAGAGAGAGAGAGAGAGAGAGAGAGAGAG	AGAGAGAGAGAGAGAGAGAGAGAGAGAGAGAGAGAGAG/AGAGAGAGAGAGAGAGAGAGAGAGAGAGAGAGAGAGAGAGAGAG	AGAGAGAGAGAGAG/AGAGAGAGAGAGAGAG	AGAGAGAGAGAGAGAGAGAGAGAG/AGAGAGAGAGAGAGAGAGAGAGAGAGAG	AGAGAGAGAGAGAGAGAGAGAGAGAGAGAGAGAGAGAGAG/AGAGAGAGAGAGAGAGAGAGAGAGAGAGAGAGAGAGAGAGAGAGAG	AGAGAGAGAGAGAGAGAGAGAGAGAGAGAGAGAGAGAGAGAG/AGAGAGAGAGAGAGAGAGAGAGAGAGAGAGAGAGAGAGAGAGAGAG	AGAGAGAGAGAGAGAGAGAGAGAGAGAGAG/AGAGAGAGAGAGAGAGAGAGAGAGAGAGAGAG	AGAGAGAGAGAGAGAGAGAGAGAGAGAGAGAGAGAG/AGAGAGAGAGAGAGAGAGAGAGAGAGAGAGAGAGAGAGAGAG	AGAGAGAGAGAGAGAGAGAGAGAGAGAGAGAGAGAGAG/AGAGAGAGAGAGAGAGAGAGAGAGAGAGAGAGAGAGAGAG	AGAGAGAGAGAGAGAGAGAGAGAGAGAGAG/AGAGAGAGAGAGAGAGAGAGAGAGAGAGAGAGAGAGAGAGAG	./.	AGAGAGAGAGAGAGAGAGAGAGAGAGAGAG/AGAGAGAGAGAGAGAGAGAGAGAGAGAGAGAGAGAGAGAGAGAGAG	AGAGAGAGAGAGAGAG/AGAGAGAGAGAGAGAGAGAGAGAGAGAGAGAG	AGAGAGAGAGAGAGAGAGAGAGAGAGAGAG/AGAGAGAGAGAGAGAGAGAGAGAGAGAGAGAGAGAGAGAGAGAG	AGAGAGAGAGAGAG/AGAGAGAGAGAGAGAG	AGAGAGAGAGAGAGAGAGAGAGAG/AGAGAGAGAGAGAGAGAGAGAGAGAGAGAGAGAGAG	AGAGAGAGAGAGAG/AGAGAGAGAGAGAGAGAGAGAGAGAG	AGAGAGAGAGAGAG/AGAGAGAGAGAGAGAG	AGAGAGAGAGAGAGAGAGAGAGAGAGAGAGAGAGAGAGAG/AGAGAGAGAGAGAGAGAGAGAGAGAGAGAGAGAGAGAGAGAG	AGAGAGAGAGAGAG/AGAGAGAGAGAGAGAGAGAGAGAGAG	AGAGAGAGAGAGAGAGAGAGAGAGAGAGAG/AGAGAGAGAGAGAGAGAGAGAGAGAGAGAGAGAGAGAGAGAG	AGAGAGAGAGAGAGAGAGAGAGAGAGAGAGAGAGAGAGAGAG/AGAGAGAGAGAGAGAGAGAGAGAGAGAGAGAGAGAGAGAGAGAG	AGAGAGAGAGAGAGAGAGAGAGAGAGAGAGAGAGAGAGAGAGAG/AGAGAGAGAGAGAGAGAGAGAGAGAGAGAGAGAGAGAGAGAGAGAGAG	AGAGAGAGAGAGAGAGAGAGAGAGAGAGAGAGAGAGAG/AGAGAGAGAGAGAGAGAGAGAGAGAGAGAGAGAGAGAGAGAGAGAG	AGAGAGAGAGAGAG/AGAGAGAGAGAGAGAGAGAGAGAGAGAGAGAGAGAGAGAG	AGAGAGAGAGAGAGAGAGAGAGAGAGAGAGAGAGAGAGAG/AGAGAGAGAGAGAGAGAGAGAGAGAGAGAGAGAGAGAGAGAGAG	AGAGAGAGAGAGAGAG/AGAGAGAGAGAGAGAGAGAGAGAGAGAGAG	AGAGAGAGAGAGAGAGAGAGAGAG/AGAGAGAGAGAGAGAGAGAGAGAGAG	AGAGAGAGAGAGAGAGAGAGAGAGAGAGAGAGAGAGAGAGAG/AGAGAGAGAGAGAGAGAGAGAGAGAGAGAGAGAGAGAGAGAGAG	AGAGAGAGAGAGAGAGAGAGAGAGAGAGAGAGAGAG/AGAGAGAGAGAGAGAGAGAGAGAGAGAGAGAGAGAGAGAGAG	AGAGAGAGAGAGAGAGAGAGAG/AGAGAGAGAGAGAGAGAGAGAGAGAGAGAGAGAGAGAGAGAG	AGAGAGAGAGAGAGAGAGAGAGAGAGAGAG/AGAGAGAGAGAGAGAGAGAGAGAGAGAGAGAGAGAGAGAGAGAG	AGAGAGAGAGAGAGAGAGAGAGAGAGAGAGAGAGAGAGAG/AGAGAGAGAGAGAGAGAGAGAGAGAGAGAGAGAGAGAGAGAG	AGAGAGAGAGAGAGAGAGAGAG/AGAGAGAGAGAGAGAGAGAGAGAGAGAGAGAGAGAGAGAGAGAGAG	AGAGAGAGAGAGAGAGAGAGAGAGAGAGAGAGAGAGAGAGAG/AGAGAGAGAGAGAGAGAGAGAGAGAGAGAGAGAGAGAGAGAGAGAG	AGAGAGAGAGAGAGAG/AGAGAGAGAGAGAGAGAGAGAGAGAGAGAGAGAG	AGAGAGAGAGAGAGAGAG/AGAGAGAGAGAGAGAGAG
Xunr108	5	68930381	ACTGTTGTCACTGTTTTGCTTGCCTTTTCCAACTTTAAGC	54.027	GAGACCTACAGAAGAACCGATGGCTTGGGTAGAAGAACAG	55.091	CTCTCTCTCTCTCTCTCTCTCTCTCTCTCTCTCTCTC	CTCTCTCTCTCTCTCTCTCTCTCTCTCTCTCTCTCTC;CTCTCTCTCTC;CTCTCTCTCTCTC;CTCTCTCTCTCTCTC;CTCTCTCTCTCTCTCTC;CTCTCTCTCTCTCTCTCTC;CTCTCTCTCTCTCTCTCTCTC;CTCTCTCTCTCTCTCTCTCTCTC;CTCTCTCTCTCTCTCTCTCTCTCTC;CTCTCTCTCTCTCTCTCTCTCTCTCTC;CTCTCTCTCTCTCTCTCTCTCTCTCTCTC;CTCTCTCTCTCTCTCTCTCTCTCTCTCTCTC;CTCTCTCTCTCTCTCTCTCTCTCTCTCTCTCTC;CTCTCTCTCTCTCTCTCTCTCTCTCTCTCTCTCTC;CTCTCTCTCTCTCTCTCTCTCTCTCTCTCTCTCTCTCTC;CTCTCTCTC…	./.	CTCTCTCTCTCTCTC/CTCTCTCTCTCTCTCTC	./.	./.	./.	CTCTCTCTCTCTC/CTCTCTCTCTCTC	./.	CTCTCTCTCTC/CTCTCTCTCTC	CTCTCTCTCTCTCTCTCTCTCTC/CTCTCTCTCTCTCTCTCTCTCTC	./.	CTCTCTCTCTCTCTCTCTCTCTCTCTCTCTCTCTCTC/CTCTCTCTCTCTCTCTCTCTCTCTCTCTCTCTCTCTCTC	CTCTCTCTCTCTCTC/CTCTCTCTCTCTCTCTCTCTCTCTCTCTCTCTCTC	CTCTCTCTCTCTCTC/CTCTCTCTCTCTCTCTC	CTCTCTCTCTCTCTCTCTCTC/CTCTCTCTCTCTCTCTCTCTCTCTCTCTCTCTCTCTCTCTC	./.	./.	CTCTCTCTCTCTCTCTCTCTCTCTCTCTCTCTCTCTCTC/CTCTCTCTCTCTCTCTCTCTCTCTCTCTCTCTCTCTCTC	CTCTCTCTCTCTCTCTCTCTCTCTCTCTCTCTCTC/CTCTCTCTCTCTCTCTCTCTCTCTCTCTCTCTCTCTC	./.	CTCTCTCTCTCTCTCTCTCTCTCTCTCTCTC/CTCTCTCTCTCTCTCTCTCTCTCTCTCTCTCTC	CTCTCTCTCTC/CTCTCTCTCTC	./.	CTCTCTCTCTCTCTCTCTCTCTCTCTCTCTCTCTCTCTCTCTC/CTCTCTCTCTCTCTCTCTCTCTCTCTCTCTCTCTCTCTCTCTC	CTCTCTCTCTCTCTCTCTCTCTCTCTCTCTCTC/CTCTCTCTCTCTCTCTCTCTCTCTCTCTCTCTCTCTC	CTCTCTCTCTCTCTCTCTCTCTCTCTCTCTCTC/CTCTCTCTCTCTCTCTCTCTCTCTCTCTCTCTCTCTC	CTCTCTCTCTCTCTCTCTCTCTCTCTCTCTCTCTC/CTCTCTCTCTCTCTCTCTCTCTCTCTCTCTCTCTCTC	./.	CTCTCTCTCTCTCTCTCTCTCTCTCTC/CTCTCTCTCTCTCTCTCTCTCTCTCTC	./.	./.	CTCTCTCTCTCTC/CTCTCTCTCTCTCTCTCTCTCTCTC	CTCTCTCTCTCTCTC/CTCTCTCTCTCTCTCTC	CTCTCTCTCTC/CTCTCTCTCTC	CTCTCTCTCTCTCTCTCTCTC/CTCTCTCTCTCTCTCTCTCTCTCTCTCTCTCTC	./.	CTCTCTCTCTCTCTCTCTCTC/CTCTCTCTCTCTCTCTCTCTC	./.	./.	CTCTCTCTCTCTCTCTCTCTCTCTCTCTCTCTCTC/CTCTCTCTCTCTCTCTCTCTCTCTCTCTCTCTCTC	CTCTCTCTCTCTCTCTCTCTCTCTCTC/CTCTCTCTCTCTCTCTCTCTCTCTCTCTCTCTC	./.
Xunr109	5	69337441	GCAAGGCCGCCCCCATGGCCGGCGCCTCGTCCCGCTCCAC	70.251	GACGGGGCCGCGGAGGGGGCCGGGGTGGATCTGCCGTAGC	69.202	CGCCAGCGCCAGCGCCAGCGCC	CGCCAGCGCC;CGCCAGCGCCAGCGCC;CGCCAGCGCCAGCGCCAGCGC;CGCCAGCGCCAGCGCCAGCGCCAGCGCC	CGCCAGCGCCAGCGCCAGCGCC/CGCCAGCGCCAGCGCCAGCGCC	CGCCAGCGCCAGCGCCAGCGCC/CGCCAGCGCCAGCGCCAGCGCC	CGCCAGCGCCAGCGCCAGCGCC/CGCCAGCGCCAGCGCCAGCGCC	CGCCAGCGCCAGCGCCAGCGCC/CGCCAGCGCCAGCGCCAGCGCC	CGCCAGCGCCAGCGCCAGCGCC/CGCCAGCGCCAGCGCCAGCGCC	CGCCAGCGCCAGCGCCAGCGCC/CGCCAGCGCCAGCGCCAGCGCC	CGCCAGCGCCAGCGCCAGCGCC/CGCCAGCGCCAGCGCCAGCGCC	CGCCAGCGCCAGCGCCAGCGCC/CGCCAGCGCCAGCGCCAGCGCC	CGCCAGCGCCAGCGCCAGCGCC/CGCCAGCGCCAGCGCCAGCGCC	CGCCAGCGCCAGCGCCAGCGCC/CGCCAGCGCCAGCGCCAGCGCC	CGCCAGCGCCAGCGCCAGCGCC/CGCCAGCGCCAGCGCCAGCGCC	CGCCAGCGCCAGCGCCAGCGCC/CGCCAGCGCCAGCGCCAGCGCC	CGCCAGCGCCAGCGCCAGCGCC/CGCCAGCGCCAGCGCCAGCGCC	CGCCAGCGCCAGCGCCAGCGCC/CGCCAGCGCCAGCGCCAGCGCC	CGCCAGCGCCAGCGCCAGCGCC/CGCCAGCGCCAGCGCCAGCGCC	CGCCAGCGCCAGCGCCAGCGCC/CGCCAGCGCCAGCGCCAGCGCC	CGCCAGCGCCAGCGCCAGCGCC/CGCCAGCGCCAGCGCCAGCGCC	CGCCAGCGCCAGCGCCAGCGCC/CGCCAGCGCCAGCGCCAGCGCC	CGCCAGCGCCAGCGCCAGCGCC/CGCCAGCGCCAGCGCCAGCGCC	CGCCAGCGCCAGCGCCAGCGCC/CGCCAGCGCCAGCGCCAGCGCC	CGCCAGCGCCAGCGCCAGCGCC/CGCCAGCGCCAGCGCCAGCGCC	CGCCAGCGCCAGCGCCAGCGCC/CGCCAGCGCCAGCGCCAGCGCC	CGCCAGCGCC/CGCCAGCGCC	CGCCAGCGCCAGCGCCAGCGCC/CGCCAGCGCCAGCGCCAGCGCC	CGCCAGCGCCAGCGCCAGCGCC/CGCCAGCGCCAGCGCCAGCGCC	CGCCAGCGCCAGCGCCAGCGCC/CGCCAGCGCCAGCGCCAGCGCC	CGCCAGCGCCAGCGCCAGCGCCAGCGCC/CGCCAGCGCCAGCGCCAGCGCCAGCGCC	CGCCAGCGCCAGCGCCAGCGCC/CGCCAGCGCCAGCGCCAGCGCC	CGCCAGCGCCAGCGCCAGCGCC/CGCCAGCGCCAGCGCCAGCGCC	CGCCAGCGCCAGCGCCAGCGCCAGCGCC/CGCCAGCGCCAGCGCCAGCGCCAGCGCC	CGCCAGCGCCAGCGCCAGCGCC/CGCCAGCGCCAGCGCCAGCGCC	CGCCAGCGCCAGCGCCAGCGCC/CGCCAGCGCCAGCGCCAGCGCC	CGCCAGCGCCAGCGCCAGCGCC/CGCCAGCGCCAGCGCCAGCGCC	CGCCAGCGCCAGCGCCAGCGCC/CGCCAGCGCCAGCGCCAGCGCC	CGCCAGCGCCAGCGCCAGCGCC/CGCCAGCGCCAGCGCCAGCGCC	CGCCAGCGCCAGCGCCAGCGCC/CGCCAGCGCCAGCGCCAGCGCC	CGCCAGCGCC/CGCCAGCGCC	CGCCAGCGCCAGCGCCAGCGCC/CGCCAGCGCCAGCGCCAGCGCC	CGCCAGCGCC/CGCCAGCGCCAGCGCCAGCGCC	CGCCAGCGCC/CGCCAGCGCC	CGCCAGCGCCAGCGCCAGCGCC/CGCCAGCGCCAGCGCCAGCGCC
Xunr110	5	70640853	CTCAGGCCGACCGGCTGCCAAAGGGCCTCCCATCCATCCT	64.344	CGCACGCTGCCTGCCCACTGGCTGGTTATCCCGACGATAC	63.163	ATGCCGATGCCGATGTCGATGCCGATGCCGA	ATGCCGATGCCGA;ATGCCGATGCCGATGTCGA;ATGCCGATGCCGATGTCGATGCCGATGCCGATGCCGA	./.	ATGCCGATGCCGATGTCGATGCCGATGCCGA/ATGCCGATGCCGATGTCGATGCCGATGCCGA	ATGCCGATGCCGATGTCGATGCCGATGCCGA/ATGCCGATGCCGATGTCGATGCCGATGCCGA	./.	ATGCCGATGCCGATGTCGATGCCGATGCCGA/ATGCCGATGCCGATGTCGATGCCGATGCCGA	ATGCCGATGCCGATGTCGATGCCGATGCCGA/ATGCCGATGCCGATGTCGATGCCGATGCCGA	ATGCCGATGCCGA/ATGCCGATGCCGA	./.	ATGCCGATGCCGATGTCGATGCCGATGCCGA/ATGCCGATGCCGATGTCGATGCCGATGCCGA	./.	./.	ATGCCGATGCCGATGTCGATGCCGATGCCGA/ATGCCGATGCCGATGTCGATGCCGATGCCGA	./.	./.	./.	./.	./.	ATGCCGATGCCGATGTCGATGCCGATGCCGA/ATGCCGATGCCGATGTCGATGCCGATGCCGA	ATGCCGATGCCGATGTCGATGCCGATGCCGA/ATGCCGATGCCGATGTCGATGCCGATGCCGA	./.	./.	./.	./.	ATGCCGATGCCGATGTCGATGCCGATGCCGA/ATGCCGATGCCGATGTCGATGCCGATGCCGA	./.	ATGCCGATGCCGATGTCGATGCCGATGCCGA/ATGCCGATGCCGATGTCGATGCCGATGCCGA	./.	./.	ATGCCGATGCCGATGTCGATGCCGATGCCGA/ATGCCGATGCCGATGTCGATGCCGATGCCGA	./.	./.	./.	./.	./.	./.	ATGCCGATGCCGATGTCGATGCCGATGCCGA/ATGCCGATGCCGATGTCGATGCCGATGCCGA	./.	ATGCCGATGCCGATGTCGATGCCGATGCCGA/ATGCCGATGCCGATGTCGATGCCGATGCCGA	./.	ATGCCGATGCCGATGTCGATGCCGATGCCGA/ATGCCGATGCCGATGTCGATGCCGATGCCGA	ATGCCGATGCCGA/ATGCCGATGCCGA
Xunr111	6	1549089	CCGCCAGTGTGCTCTCACACTCACACTCACAGCACGACAC	60.936	TGAGGAAAACGGGGAGGCGGCGGCGGCAGCAACCGGACTG	66.529	AGCAGCAGCAGCAGCAGC	AGCAG;AGCAGC;AGCAGCAGC;AGCAGCAGCAGC;AGCAGCAGCAGCA;AGCAGCAGCAGCAGC;AGCAGCAGCAGCAGCAGCAGC;AGCAGCAGCAGCAGCAGCAGCAGC	AGCAGCAGC/AGCAGCAGCAGCAGCAGCAGCAGC	AGCAGCAGCAGCAGCAGCAGC/AGCAGCAGCAGCAGCAGCAGC	AGCAGCAGCAGCAGCAGC/AGCAGCAGCAGCAGCAGC	AGCAGCAGC/AGCAGCAGC	AGCAGCAGCAGCAGCAGC/AGCAGCAGCAGCAGCAGC	AGCAGCAGCAGCAGCAGC/AGCAGCAGCAGCAGCAGC	AGCAGCAGCAGCAGCAGC/AGCAGCAGCAGCAGCAGC	AGCAGCAGCAGCAGCAGC/AGCAGCAGCAGCAGCAGC	AGCAGCAGCAGCAGCAGC/AGCAGCAGCAGCAGCAGC	AGCAGCAGC/AGCAGCAGC	AGCAGCAGC/AGCAGCAGC	AGCAGCAGC/AGCAGCAGC	AGCAGCAGC/AGCAGCAGC	AGCAGCAGC/AGCAGCAGC	AGCAGCAGCAGCAGCAGC/AGCAGCAGCAGCAGCAGC	AGCAGCAGC/AGCAGCAGCAGCAGCAGC	AGCAGCAGC/AGCAGCAGC	AGCAGCAGC/AGCAGCAGC	AGCAGCAGC/AGCAGCAGC	AGCAGCAGC/AGCAGCAGC	AGCAGCAGC/AGCAGCAGC	AGCAGCAGC/AGCAGCAGC	AGCAGCAGC/AGCAGCAGC	AGCAGCAGCAGCAGCAGC/AGCAGCAGCAGCAGCAGC	AGCAGCAGCAGCAGCAGC/AGCAGCAGCAGCAGCAGC	AGCAGC/AGCAGCAGCAGC	AGCAGCAGC/AGCAGCAGC	AGCAGCAGC/AGCAGCAGC	AGCAGCAGC/AGCAGCAGC	AGCAGCAGC/AGCAGCAGC	AGCAGCAGCAGCAGCAGC/AGCAGCAGCAGCAGCAGC	AGCAGCAGCAGCAGCAGC/AGCAGCAGCAGCAGCAGC	AGCAGCAGCAGCAGCAGC/AGCAGCAGCAGCAGCAGC	AGCAGCAGCAGCAGCAGC/AGCAGCAGCAGCAGCAGC	AGCAGCAGC/AGCAGCAGC	AGCAGCAGCAGCAGCAGC/AGCAGCAGCAGCAGCAGC	AGCAGCAGCAGCAGCAGCAGCAGC/AGCAGCAGCAGCAGCAGCAGCAGC	AGCAGCAGC/AGCAGCAGC	AGCAGCAGCAGCAGCAGCAGC/AGCAGCAGCAGCAGCAGCAGC	AGCAGCAGCAGCAGCAGC/AGCAGCAGCAGCAGCAGC	AGCAGCAGC/AGCAGCAGC
Xunr112	6	3080864	ATGGCGACGACGGCGGTGGAGCCGACGATGCCGTTGTTGC	65.937	CGGCCGCGTCACCGTCACCCGCCCCACCCCCTGCGGATGC	70.041	CGGCGGCGGAGGCGGAGGCGG	CGGCGGCGGAGGCGGAGG;CGGCGGCGGAGGCGGAGGCGGCGGCGG;CGGCGGCGGAGGCGGAGGCGGCGGCGGCGG;CGGCGGCGGAGGCGGAGGCGGCGGCGGCGGCGGC;CGGCGGCGGAGGCGGAGGCGGCGGCGGCGGCGGCGG;CGGCGGCGGAGGCGGAGGCGGCGGCGGCGGCGGCGGCGG	./.	CGGCGGCGGAGGCGGAGGCGGCGGCGGCGGCGGCGG/CGGCGGCGGAGGCGGAGGCGGCGGCGGCGGCGGCGG	CGGCGGCGGAGGCGGAGGCGGCGGCGGCGGCGGCGG/CGGCGGCGGAGGCGGAGGCGGCGGCGGCGGCGGCGG	CGGCGGCGGAGGCGGAGGCGG/CGGCGGCGGAGGCGGAGGCGG	CGGCGGCGGAGGCGGAGGCGGCGGCGGCGG/CGGCGGCGGAGGCGGAGGCGGCGGCGGCGG	CGGCGGCGGAGGCGGAGGCGGCGGCGGCGG/CGGCGGCGGAGGCGGAGGCGGCGGCGGCGG	CGGCGGCGGAGGCGGAGGCGG/CGGCGGCGGAGGCGGAGGCGG	CGGCGGCGGAGGCGGAGGCGGCGGCGGCGG/CGGCGGCGGAGGCGGAGGCGGCGGCGGCGG	CGGCGGCGGAGGCGGAGGCGG/CGGCGGCGGAGGCGGAGGCGG	CGGCGGCGGAGGCGGAGGCGG/CGGCGGCGGAGGCGGAGGCGG	CGGCGGCGGAGGCGGAGGCGG/CGGCGGCGGAGGCGGAGGCGG	CGGCGGCGGAGGCGGAGGCGG/CGGCGGCGGAGGCGGAGGCGG	CGGCGGCGGAGGCGGAGGCGG/CGGCGGCGGAGGCGGAGGCGG	CGGCGGCGGAGGCGGAGGCGG/CGGCGGCGGAGGCGGAGGCGG	CGGCGGCGGAGGCGGAGGCGGCGGCGGCGGCGGCGG/CGGCGGCGGAGGCGGAGGCGGCGGCGGCGGCGGCGG	CGGCGGCGGAGGCGGAGGCGGCGGCGGCGGCGGCGG/CGGCGGCGGAGGCGGAGGCGGCGGCGGCGGCGGCGG	CGGCGGCGGAGGCGGAGGCGGCGGCGGCGGCGGCGG/CGGCGGCGGAGGCGGAGGCGGCGGCGGCGGCGGCGG	CGGCGGCGGAGGCGGAGGCGG/CGGCGGCGGAGGCGGAGGCGG	CGGCGGCGGAGGCGGAGGCGG/CGGCGGCGGAGGCGGAGGCGG	CGGCGGCGGAGGCGGAGGCGGCGGCGGCGGCGGCGG/CGGCGGCGGAGGCGGAGGCGGCGGCGGCGGCGGCGG	CGGCGGCGGAGGCGGAGGCGG/CGGCGGCGGAGGCGGAGGCGGCGGCGGCGGCGGCGG	CGGCGGCGGAGGCGGAGGCGG/CGGCGGCGGAGGCGGAGGCGG	CGGCGGCGGAGGCGGAGGCGG/CGGCGGCGGAGGCGGAGGCGG	CGGCGGCGGAGGCGGAGGCGGCGGCGGCGGCGGCGG/CGGCGGCGGAGGCGGAGGCGGCGGCGGCGGCGGCGG	CGGCGGCGGAGGCGGAGGCGG/CGGCGGCGGAGGCGGAGGCGG	CGGCGGCGGAGGCGGAGGCGG/CGGCGGCGGAGGCGGAGGCGG	CGGCGGCGGAGGCGGAGGCGGCGGCGGCGGCGGCGG/CGGCGGCGGAGGCGGAGGCGGCGGCGGCGGCGGCGG	CGGCGGCGGAGGCGGAGGCGGCGGCGGCGGCGGCGG/CGGCGGCGGAGGCGGAGGCGGCGGCGGCGGCGGCGG	CGGCGGCGGAGGCGGAGGCGG/CGGCGGCGGAGGCGGAGGCGG	CGGCGGCGGAGGCGGAGGCGGCGGCGGCGGCGGCGG/CGGCGGCGGAGGCGGAGGCGGCGGCGGCGGCGGCGG	./.	CGGCGGCGGAGGCGGAGGCGG/CGGCGGCGGAGGCGGAGGCGG	CGGCGGCGGAGGCGGAGGCGGCGGCGGCGGCGGCGG/CGGCGGCGGAGGCGGAGGCGGCGGCGGCGGCGGCGG	CGGCGGCGGAGGCGGAGGCGG/CGGCGGCGGAGGCGGAGGCGG	CGGCGGCGGAGGCGGAGGCGG/CGGCGGCGGAGGCGGAGGCGG	CGGCGGCGGAGGCGGAGGCGGCGGCGGCGGCGGCGG/CGGCGGCGGAGGCGGAGGCGGCGGCGGCGGCGGCGG	CGGCGGCGGAGGCGGAGG/CGGCGGCGGAGGCGGAGG	CGGCGGCGGAGGCGGAGGCGGCGGCGGCGGCGGCGG/CGGCGGCGGAGGCGGAGGCGGCGGCGGCGGCGGCGG	CGGCGGCGGAGGCGGAGGCGGCGGCGGCGGCGGCGG/CGGCGGCGGAGGCGGAGGCGGCGGCGGCGGCGGCGG	CGGCGGCGGAGGCGGAGGCGG/CGGCGGCGGAGGCGGAGGCGG	CGGCGGCGGAGGCGGAGGCGG/CGGCGGCGGAGGCGGAGGCGG
Xunr113	6	4907547	CAAGATTCCCTAGGCCCTGATGCGCAAAATTAAGTAAAGG	54.12	AATTCACACACATGCTAGTGATTACATTCCATTGGATAAT	49.801	TATATATATATATATATATATATATATATAT	TATATATAT;TATATATATAT;TATATATATATATAT;TATATATATATATATAT;TATATATATATATATATATAT	./.	./.	./.	./.	./.	./.	./.	TATATATATATATATAT/TATATATATATATATAT	./.	./.	./.	./.	./.	./.	./.	./.	./.	./.	./.	./.	./.	./.	./.	./.	./.	./.	./.	./.	./.	./.	./.	TATATATATATATAT/TATATATATATATAT	./.	./.	./.	./.	./.	./.	./.	./.	./.
Xunr114	6	44220126	GCAGGACAAACTTGGCCGTCCCCATAGCTACCCGCACCTC	61.637	CCATCGCAACTACTACAACATGAAATAACGTGTGCTTGTG	53.781	TATATATATATATATATATATATATAT	TATATATATATAT;TATATATATATATAT;TATATATATATATATAT;TATATATATATATATATATAT;TATATATATATATATATATATAT;TATATATATATATATATATATATAT;TATATATATATATATATATATATATATATATATATATATATATATATATATAT;TATATATATATATATATATATATATATATATATATATATATATATATATATATATATATA	./.	TATATATATATAT/TATATATATATATATATATATAT	./.	./.	TATATATATATATAT/TATATATATATATATAT	./.	./.	./.	./.	TATATATATATATATAT/TATATATATATATATAT	./.	TATATATATATATATAT/TATATATATATATATAT	./.	TATATATATATATATAT/TATATATATATATATAT	./.	./.	./.	./.	TATATATATATATAT/TATATATATATATATAT	./.	./.	./.	TATATATATATATATAT/TATATATATATATATAT	./.	./.	TATATATATATATATAT/TATATATATATATATAT	./.	./.	./.	TATATATATATATATATATAT/TATATATATATATATATATAT	./.	./.	./.	./.	TATATATATATATATAT/TATATATATATATATAT	TATATATATATATATATATATAT/TATATATATATATATATATATAT	./.	./.	./.	TATATATATATATATAT/TATATATATATATATAT	./.
Xunr115	6	45324464	GGTGTACCCGCGGTGGCGTCAGACGAGCGAGCGAGGCTTG	65.376	GCCAAGCATGGGCCCTCCTCCATCGTCCGATCGTATCAGC	61.496	GGACTGACGGACGGACGGACGG	GGACTGACGGACGGACGGACGG;GGACTGACGG;GGACTGACGGA;GGACTGACGGACGG;GGACTGACGGACGGACGG;GGACTGACGGACGGACGGACGGACGG	GGACTGACGGACGGACGGACGG/GGACTGACGGACGGACGGACGG	GGACTGACGGACGGACGGACGG/GGACTGACGGACGGACGGACGG	GGACTGACGGACGGACGGACGG/GGACTGACGGACGGACGGACGG	GGACTGACGG/GGACTGACGGACGGACGGACGG	GGACTGACGGACGGACGGACGG/GGACTGACGGACGGACGGACGG	GGACTGACGGACGGACGGACGG/GGACTGACGGACGGACGGACGG	GGACTGACGGACGGACGGACGG/GGACTGACGGACGGACGGACGG	GGACTGACGG/GGACTGACGG	GGACTGACGGACGGACGGACGG/GGACTGACGGACGGACGGACGG	GGACTGACGGACGGACGGACGG/GGACTGACGGACGGACGGACGG	GGACTGACGGACGGACGGACGG/GGACTGACGGACGGACGGACGG	GGACTGACGGACGGACGGACGG/GGACTGACGGACGGACGGACGG	GGACTGACGG/GGACTGACGG	GGACTGACGGACGGACGGACGG/GGACTGACGGACGGACGGACGG	GGACTGACGGACGGACGGACGG/GGACTGACGGACGGACGGACGG	GGACTGACGGACGGACGGACGG/GGACTGACGGACGGACGGACGG	GGACTGACGGACGGACGGACGG/GGACTGACGGACGGACGGACGG	GGACTGACGGACGGACGGACGG/GGACTGACGGACGGACGGACGG	GGACTGACGGACGGACGGACGG/GGACTGACGGACGGACGGACGG	GGACTGACGGACGGACGGACGG/GGACTGACGGACGGACGGACGG	GGACTGACGGACGGACGGACGG/GGACTGACGGACGGACGGACGG	GGACTGACGGACGGACGGACGG/GGACTGACGGACGGACGGACGG	GGACTGACGGACGGACGGACGG/GGACTGACGGACGGACGGACGG	GGACTGACGGACGGACGGACGG/GGACTGACGGACGGACGGACGG	GGACTGACGGACGGACGGACGG/GGACTGACGGACGGACGGACGG	GGACTGACGGACGGACGGACGG/GGACTGACGGACGGACGGACGG	GGACTGACGGACGGACGGACGG/GGACTGACGGACGGACGGACGG	GGACTGACGG/GGACTGACGG	GGACTGACGGACGGACGGACGG/GGACTGACGGACGGACGGACGG	GGACTGACGGACGGACGGACGG/GGACTGACGGACGGACGGACGG	GGACTGACGGACGGACGGACGG/GGACTGACGGACGGACGGACGG	GGACTGACGG/GGACTGACGGACGGACGGACGG	GGACTGACGGACGGACGGACGG/GGACTGACGGACGGACGGACGG	GGACTGACGGACGGACGGACGG/GGACTGACGGACGGACGGACGG	GGACTGACGGACGGACGGACGG/GGACTGACGGACGGACGGACGG	GGACTGACGGACGGACGGACGG/GGACTGACGGACGGACGGACGG	GGACTGACGGACGGACGGACGG/GGACTGACGGACGGACGGACGG	GGACTGACGGACGGACGGACGG/GGACTGACGGACGGACGGACGG	GGACTGACGGACGGACGGACGG/GGACTGACGGACGGACGGACGG	GGACTGACGGACGGACGGACGG/GGACTGACGGACGGACGGACGG	GGACTGACGGACGGACGGACGG/GGACTGACGGACGGACGGACGG
Xunr116	6	46673216	GGAGGTAGCGACGAGGAAAACGCGAGGTCGTCCAAGAAAC	59.593	AGCAGCGGCGTCGACGCGGACCCCGCCTCCGCCGCGGCGG	73.291	GCCGTCGCCGTCGCCGACGCCG	GCCGTCGCCG;GCCGTCGCCGTCGCCGACGCCGTCGCCG	GCCGTCGCCGTCGCCGACGCCGTCGCCG/GCCGTCGCCGTCGCCGACGCCGTCGCCG	GCCGTCGCCGTCGCCGACGCCG/GCCGTCGCCGTCGCCGACGCCG	./.	GCCGTCGCCGTCGCCGACGCCG/GCCGTCGCCGTCGCCGACGCCG	GCCGTCGCCGTCGCCGACGCCG/GCCGTCGCCGTCGCCGACGCCG	GCCGTCGCCGTCGCCGACGCCG/GCCGTCGCCGTCGCCGACGCCG	GCCGTCGCCGTCGCCGACGCCG/GCCGTCGCCGTCGCCGACGCCG	GCCGTCGCCGTCGCCGACGCCG/GCCGTCGCCGTCGCCGACGCCG	GCCGTCGCCGTCGCCGACGCCG/GCCGTCGCCGTCGCCGACGCCG	./.	GCCGTCGCCGTCGCCGACGCCG/GCCGTCGCCGTCGCCGACGCCG	./.	GCCGTCGCCGTCGCCGACGCCG/GCCGTCGCCGTCGCCGACGCCG	./.	./.	GCCGTCGCCGTCGCCGACGCCG/GCCGTCGCCGTCGCCGACGCCG	GCCGTCGCCG/GCCGTCGCCG	./.	GCCGTCGCCG/GCCGTCGCCG	GCCGTCGCCGTCGCCGACGCCGTCGCCG/GCCGTCGCCGTCGCCGACGCCGTCGCCG	GCCGTCGCCGTCGCCGACGCCG/GCCGTCGCCGTCGCCGACGCCG	GCCGTCGCCGTCGCCGACGCCG/GCCGTCGCCGTCGCCGACGCCG	GCCGTCGCCG/GCCGTCGCCG	GCCGTCGCCGTCGCCGACGCCG/GCCGTCGCCGTCGCCGACGCCGTCGCCG	GCCGTCGCCGTCGCCGACGCCG/GCCGTCGCCGTCGCCGACGCCG	GCCGTCGCCGTCGCCGACGCCG/GCCGTCGCCGTCGCCGACGCCG	./.	GCCGTCGCCGTCGCCGACGCCG/GCCGTCGCCGTCGCCGACGCCG	./.	GCCGTCGCCG/GCCGTCGCCG	./.	GCCGTCGCCGTCGCCGACGCCG/GCCGTCGCCGTCGCCGACGCCG	./.	GCCGTCGCCGTCGCCGACGCCG/GCCGTCGCCGTCGCCGACGCCG	GCCGTCGCCG/GCCGTCGCCG	./.	./.	GCCGTCGCCG/GCCGTCGCCG	GCCGTCGCCGTCGCCGACGCCG/GCCGTCGCCGTCGCCGACGCCG	GCCGTCGCCGTCGCCGACGCCG/GCCGTCGCCGTCGCCGACGCCG	./.
Xunr117	6	48715700	GGAGCCGGGTCGCGACGTCCCCGGCGGGCGGCGATCGCCG	72.1	CTGCGGCCCCCGAGGGACCGGAGCCGGAAAAGCGCCAACC	67.758	AGAGAGAGAGAGAGAGAGAGAGAG	AGAGAGAGAGAGAGAGAGAGAGAG;AGAGAGAG;AGAGAGAGAG;AGAGAGAGAGAG;AGAGAGAGAGAGAG;AGAGAGAGAGAGAGAGAG;AGAGAGAGAGAGAGAGAGAG;AGAGAGAGAGAGAGAGAGAGAG;AGAGAGAGAGAGAGAGAGAGAGAGAG;AGAGAGAGAGAGAGAGAGAGAGAGAGAG;AGAGAGAGAGAGAGAGAGAGAGAGAGAGAG;AGAGAGAGAGAGAGAGAGAGAGAGAGAGAGAG;AGAGAGAGAGAGAGAGAGAGAGAGAGAGAGAGAG;AGAGAGAGAGAGAGAGAGAGAGAGAGAGAGAGAGAG;AGAGAGAGAGAGAGAGAGAGAGAGAGAGAGAGAGAGAG;AGAGAGAGAGAGAGAGAGAGAGAGAGAGAGAG…	AGAGAGAGAGAGAGAGAGAGAGAGAGAGAGAGAGAGAGAGAGAG/AGAGAGAGAGAGAGAGAGAGAGAGAGAGAGAGAGAGAGAGAGAG	AGAGAGAGAGAGAGAGAGAGAGAGAGAGAG/AGAGAGAGAGAGAGAGAGAGAGAGAGAGAGAGAGAGAG	AGAGAGAGAGAGAGAGAGAGAG/AGAGAGAGAGAGAGAGAGAGAGAG	AGAGAGAGAGAGAGAGAGAGAGAGAG/AGAGAGAGAGAGAGAGAGAGAGAGAGAG	AGAGAGAGAGAGAGAGAGAGAGAGAGAGAGAG/AGAGAGAGAGAGAGAGAGAGAGAGAGAGAGAGAGAGAGAGAGAGAGAGAG	AGAGAGAGAGAGAGAGAGAGAGAGAGAGAGAGAGAGAGAG/AGAGAGAGAGAGAGAGAGAGAGAGAGAGAGAGAGAGAGAGAG	AGAGAGAGAGAGAGAGAGAGAG/AGAGAGAGAGAGAGAGAGAGAGAG	AGAGAGAGAGAGAGAGAGAGAGAGAGAGAGAGAG/AGAGAGAGAGAGAGAGAGAGAGAGAGAGAGAGAGAG	AGAGAGAGAGAGAGAGAGAGAGAGAGAGAGAGAGAGAG/AGAGAGAGAGAGAGAGAGAGAGAGAGAGAGAGAGAGAGAG	AGAGAGAGAGAGAGAGAGAGAG/AGAGAGAGAGAGAGAGAGAGAGAG	AGAGAGAGAGAGAGAGAG/AGAGAGAGAGAGAGAGAGAGAGAGAGAGAGAGAGAGAGAG	AGAGAGAGAGAGAGAGAGAGAGAGAGAGAGAGAGAG/AGAGAGAGAGAGAGAGAGAGAGAGAGAGAGAGAGAGAG	AGAGAGAGAGAGAGAGAGAGAGAGAGAG/AGAGAGAGAGAGAGAGAGAGAGAGAGAGAG	AGAGAGAGAGAGAGAGAGAGAG/AGAGAGAGAGAGAGAGAGAGAGAG	AGAGAGAGAGAGAGAGAGAGAGAGAGAGAGAGAGAGAG/AGAGAGAGAGAGAGAGAGAGAGAGAGAGAGAGAGAGAG	AGAGAGAGAGAGAGAGAGAGAGAGAGAGAGAGAGAGAG/AGAGAGAGAGAGAGAGAGAGAGAGAGAGAGAGAGAGAGAG	AGAGAGAGAGAGAGAGAGAGAGAGAGAGAGAGAGAGAGAGAGAGAGAG/AGAGAGAGAGAGAGAGAGAGAGAGAGAGAGAGAGAGAGAGAGAGAGAG	AGAGAGAGAGAGAGAGAGAGAGAGAGAGAGAGAGAGAGAGAGAGAG/AGAGAGAGAGAGAGAGAGAGAGAGAGAGAGAGAGAGAGAGAGAGAG	AGAGAGAGAGAGAGAGAGAGAGAGAGAGAGAGAGAG/AGAGAGAGAGAGAGAGAGAGAGAGAGAGAGAGAGAGAG	AGAGAGAGAGAGAGAGAGAGAGAGAGAGAGAGAG/AGAGAGAGAGAGAGAGAGAGAGAGAGAGAGAGAGAG	AGAGAGAGAGAGAGAGAGAGAG/AGAGAGAGAGAGAGAGAGAGAGAG	AGAGAGAGAGAGAGAGAGAGAG/AGAGAGAGAGAGAGAGAGAGAGAG	AGAGAGAGAGAGAGAGAG/AGAGAGAGAGAGAGAGAGAGAGAGAG	AGAGAGAGAGAGAGAGAGAGAG/AGAGAGAGAGAGAGAGAGAGAGAG	AGAGAGAGAGAGAGAGAGAGAGAG/AGAGAGAGAGAGAGAGAGAGAGAG	AGAGAGAGAGAGAGAGAGAGAGAGAGAGAGAGAGAG/AGAGAGAGAGAGAGAGAGAGAGAGAGAGAGAGAGAGAG	AGAGAGAGAGAGAGAGAGAGAG/AGAGAGAGAGAGAGAGAGAGAGAG	AGAGAGAGAGAG/AGAGAGAGAGAGAGAGAGAGAG	AGAGAGAGAGAGAGAGAGAGAGAGAGAGAGAGAG/AGAGAGAGAGAGAGAGAGAGAGAGAGAGAGAGAGAG	AGAGAGAGAGAGAGAGAGAGAG/AGAGAGAGAGAGAGAGAGAGAGAG	AGAGAGAGAGAGAGAGAGAGAG/AGAGAGAGAGAGAGAGAGAGAGAGAGAGAGAGAGAGAG	AGAGAGAGAGAGAGAGAGAGAGAGAGAGAGAG/AGAGAGAGAGAGAGAGAGAGAGAGAGAGAGAGAG	AGAGAGAGAGAGAGAGAGAGAGAG/AGAGAGAGAGAGAGAGAGAGAGAG	AGAGAGAGAGAGAGAGAGAGAGAG/AGAGAGAGAGAGAGAGAGAGAGAG	AGAGAGAGAGAGAGAGAGAGAGAG/AGAGAGAGAGAGAGAGAGAGAGAG	AGAGAGAGAGAGAGAGAGAGAG/AGAGAGAGAGAGAGAGAGAGAGAG	./.	AGAGAGAGAGAGAGAGAGAGAGAGAGAGAGAGAGAG/AGAGAGAGAGAGAGAGAGAGAGAGAGAGAGAGAGAGAG	AGAGAGAGAGAGAGAGAGAGAGAGAGAG/AGAGAGAGAGAGAGAGAGAGAGAGAGAGAGAGAGAGAG	AGAGAGAGAGAG/AGAGAGAGAGAGAGAGAGAGAGAGAG	AGAGAGAGAGAGAGAGAGAGAGAGAGAGAGAGAGAGAGAG/AGAGAGAGAGAGAGAGAGAGAGAGAGAGAGAGAGAGAGAGAGAG
Xunr118	6	49111966	AGCATGAAAACCTAGAGGATTGTAATTATTGGTTAATCTG	48.626	GATGAGTGCAGTAACGTTTAGCTTAGGTAATATTGTCTCC	51.105	AATAAATAAATAAATAAATAAATAAA	AATAAATAAATAAA;AATAAATAAATAAATAAA;AATAAATAAATAAATAAATAAA;AATAAATAAATAAATAAATAAATAAATAAA;AATAAATAAATAAATAAATAAATAAATAAATAAA;AATAAATAAATAAATAAATAAATAAATAAATAAATAAA;AATAAATAAATAAATAAATAAATAAATAAATAAATAAATAAA;AATAAATAAATAAATAAATAAATAAATAAATAAATAAATAAATAAATAA;AATAAATAAATAAATAAATAAATAAATAAATAAATAAATAAATAAATAAA	AATAAATAAATAAATAAA/AATAAATAAATAAATAAA	AATAAATAAATAAATAAATAAATAAATAAATAAATAAATAAATAAATAA/AATAAATAAATAAATAAATAAATAAATAAATAAATAAATAAATAAATAAA	AATAAATAAATAAATAAATAAATAAA/AATAAATAAATAAATAAATAAATAAA	./.	AATAAATAAATAAATAAATAAATAAA/AATAAATAAATAAATAAATAAATAAA	AATAAATAAATAAATAAATAAATAAA/AATAAATAAATAAATAAATAAATAAA	AATAAATAAATAAATAAATAAATAAA/AATAAATAAATAAATAAATAAATAAA	./.	AATAAATAAATAAATAAATAAATAAA/AATAAATAAATAAATAAATAAATAAA	AATAAATAAATAAATAAATAAATAAA/AATAAATAAATAAATAAATAAATAAA	AATAAATAAATAAATAAATAAATAAA/AATAAATAAATAAATAAATAAATAAA	AATAAATAAATAAATAAATAAATAAA/AATAAATAAATAAATAAATAAATAAA	./.	AATAAATAAATAAATAAATAAATAAA/AATAAATAAATAAATAAATAAATAAATAAA	AATAAATAAATAAATAAATAAATAAA/AATAAATAAATAAATAAATAAATAAA	AATAAATAAATAAATAAATAAATAAA/AATAAATAAATAAATAAATAAATAAA	AATAAATAAATAAATAAATAAATAAA/AATAAATAAATAAATAAATAAATAAA	AATAAATAAATAAATAAATAAATAAA/AATAAATAAATAAATAAATAAATAAA	AATAAATAAATAAATAAA/AATAAATAAATAAATAAA	AATAAATAAATAAATAAATAAATAAA/AATAAATAAATAAATAAATAAATAAA	AATAAATAAATAAATAAATAAATAAA/AATAAATAAATAAATAAATAAATAAA	AATAAATAAATAAATAAATAAATAAA/AATAAATAAATAAATAAATAAATAAA	AATAAATAAATAAATAAA/AATAAATAAATAAATAAA	AATAAATAAATAAATAAATAAATAAA/AATAAATAAATAAATAAATAAATAAA	AATAAATAAATAAATAAATAAATAAA/AATAAATAAATAAATAAATAAATAAA	AATAAATAAATAAATAAATAAATAAATAAA/AATAAATAAATAAATAAATAAATAAATAAA	AATAAATAAATAAATAAATAAA/AATAAATAAATAAATAAATAAATAAA	AATAAATAAATAAATAAATAAATAAA/AATAAATAAATAAATAAATAAATAAA	AATAAATAAATAAATAAA/AATAAATAAATAAATAAA	AATAAATAAATAAATAAATAAATAAATAAATAAA/AATAAATAAATAAATAAATAAATAAATAAATAAATAAA	AATAAATAAATAAATAAATAAATAAA/AATAAATAAATAAATAAATAAATAAA	AATAAATAAATAAATAAATAAATAAATAAATAAATAAA/AATAAATAAATAAATAAATAAATAAATAAATAAATAAA	AATAAATAAATAAATAAATAAATAAA/AATAAATAAATAAATAAATAAATAAA	AATAAATAAATAAATAAATAAATAAA/AATAAATAAATAAATAAATAAATAAA	AATAAATAAATAAATAAATAAATAAA/AATAAATAAATAAATAAATAAATAAA	AATAAATAAATAAATAAATAAATAAA/AATAAATAAATAAATAAATAAATAAA	AATAAATAAATAAATAAA/AATAAATAAATAAATAAA	AATAAATAAATAAATAAATAAATAAA/AATAAATAAATAAATAAATAAATAAA	./.	AATAAATAAATAAATAAATAAATAAA/AATAAATAAATAAATAAATAAATAAA	AATAAATAAATAAATAAATAAATAAA/AATAAATAAATAAATAAATAAATAAA
Xunr119	6	49296761	AGTGAAAAAATTGTAAGTGCGATTTGGTTGAAACAACTAT	50.043	TCCAACTTTCTGCCTTTCAAATGAGTGGAAATAGAGAGTC	52.135	TCTCTCTCTCTCTCTC	TCTCTCTCTCTCTCTC;TCTCTCTCTCTCTC;TCTCTCTCTCTCTCT;TCTCTCTCTCTCTCTCTC;TCTCTCTCTCTCTCTCTCTC;TCTCTCTCTCTCTCTCTCTCTC;TCTCTCTCTCTCTCTCTCTCTCTC;TCTCTCTCTCTCTCTCTCTCTCTCTC;TCTCTCTCTCTCTCTCTCTCTCTCTCTC;TCTCTCTCTCTCTCTCTCTCTCTCTCTCTC;TCTCTCTCTCTCTCTCTCTCTCTCTCTCTCTC;TCTCTCTCTCTCTCTCTCTCTCTCTCTCTCTCTC;TCTCTCTCTCTCTCTCTCTCTCTCTCTCTCTCTCTCTCTCTCTC;TCTCTCTCTCTCTCTCTCTCTCTCTCTCTCTCTCTCTCTCTCTCTC	TCTCTCTCTCTCTC/TCTCTCTCTCTCTCTC	TCTCTCTCTCTCTCTC/TCTCTCTCTCTCTCTC	TCTCTCTCTCTCTC/TCTCTCTCTCTCTCTC	TCTCTCTCTCTCTCTC/TCTCTCTCTCTCTCTCTC	TCTCTCTCTCTCTCTCTC/TCTCTCTCTCTCTCTCTCTCTCTCTCTC	TCTCTCTCTCTCTCTCTC/TCTCTCTCTCTCTCTCTCTC	TCTCTCTCTCTCTC/TCTCTCTCTCTCTCTC	TCTCTCTCTCTCTCTCTC/TCTCTCTCTCTCTCTCTC	TCTCTCTCTCTCTCTCTC/TCTCTCTCTCTCTCTCTCTCTCTCTCTCTCTCTCTCTCTCTCTC	TCTCTCTCTCTCTC/TCTCTCTCTCTCTCTC	TCTCTCTCTCTCTC/TCTCTCTCTCTCTCTC	TCTCTCTCTCTCTC/TCTCTCTCTCTCTCTC	TCTCTCTCTCTCTCTC/TCTCTCTCTCTCTCTCTC	TCTCTCTCTCTCTCTC/TCTCTCTCTCTCTCTCTC	TCTCTCTCTCTCTCTC/TCTCTCTCTCTCTCTC	TCTCTCTCTCTCTC/TCTCTCTCTCTCTCTC	TCTCTCTCTCTCTC/TCTCTCTCTCTCTCTC	TCTCTCTCTCTCTC/TCTCTCTCTCTCTCTC	TCTCTCTCTCTCTCTC/TCTCTCTCTCTCTCTC	TCTCTCTCTCTCTC/TCTCTCTCTCTCTC	TCTCTCTCTCTCTC/TCTCTCTCTCTCTCTC	TCTCTCTCTCTCTCTC/TCTCTCTCTCTCTCTC	TCTCTCTCTCTCTC/TCTCTCTCTCTCTCTC	TCTCTCTCTCTCTCTCTC/TCTCTCTCTCTCTCTCTCTC	TCTCTCTCTCTCTC/TCTCTCTCTCTCTCTC	TCTCTCTCTCTCTC/TCTCTCTCTCTCTCTC	TCTCTCTCTCTCTCTC/TCTCTCTCTCTCTCTC	TCTCTCTCTCTCTCTCTC/TCTCTCTCTCTCTCTCTCTC	TCTCTCTCTCTCTC/TCTCTCTCTCTCTCTC	TCTCTCTCTCTCTCTC/TCTCTCTCTCTCTCTC	TCTCTCTCTCTCTC/TCTCTCTCTCTCTCTC	TCTCTCTCTCTCTCTCTCTCTCTCTCTCTCTC/TCTCTCTCTCTCTCTCTCTCTCTCTCTCTCTCTC	TCTCTCTCTCTCTC/TCTCTCTCTCTCTCTC	TCTCTCTCTCTCTC/TCTCTCTCTCTCTCTC	TCTCTCTCTCTCTCTCTC/TCTCTCTCTCTCTCTCTCTCTCTCTCTC	TCTCTCTCTCTCTC/TCTCTCTCTCTCTCTC	TCTCTCTCTCTCTC/TCTCTCTCTCTCTCTC	TCTCTCTCTCTCTC/TCTCTCTCTCTCTCTC	TCTCTCTCTCTCTCTCTC/TCTCTCTCTCTCTCTCTCTC	TCTCTCTCTCTCTCTCTCTC/TCTCTCTCTCTCTCTCTCTCTC	TCTCTCTCTCTCTC/TCTCTCTCTCTCTCTC
Xunr120	6	51588101	AGAAGCCTACCAAGTACCACCATTCCAGTCAAGTCCAGTC	55.833	TGCGGGGGTGTTCAGAGGTTTGGGTTGGCTCTGGCTCCTC	62.249	AAGAAGAAGAAGAAGAAGAAGAAGAAGAAGAAGAAGAAGAAG	AAGAAGAAGAAGAAGAAGAAGAAGAAGAAGAAGAAGAAGAAG;AAGAAGAAG;AAGAAGAAGAAG;AAGAAGAAGAAGAAG;AAGAAGAAGAAGAAGAAG;AAGAAGAAGAAGAAGAAGAAG;AAGAAGAAGAAGAAGAAGAAGAAG;AAGAAGAAGAAGAAGAAGAAGAAGAAG;AAGAAGAAGAAGAAGAAGAAGAAGAAGAAG;AAGAAGAAGAAGAAGAAGAAGAAGAAGAAGAAG;AAGAAGAAGAAGAAGAAGAAGAAGAAGAAGAAGAAG;AAGAAGAAGAAGAAGAAGAAGAAGAAGAAGAAGAAGAAG;AAGAAGAAGAAGAAGAAGAAGAAGAAGAAGAAGAAGAAGAAGAAG;AAGAAGAAGAAGAAGAAGAAGAAGAAGAAGAAGAA…	AAGAAGAAGAAGAAGAAG/AAGAAGAAGAAGAAGAAGAAG	AAGAAGAAGAAGAAG/AAGAAGAAGAAGAAG	AAGAAGAAGAAGAAGAAGAAGAAGAAG/AAGAAGAAGAAGAAGAAGAAGAAGAAGAAG	AAGAAGAAGAAGAAG/AAGAAGAAGAAGAAG	AAGAAGAAGAAGAAGAAGAAGAAG/AAGAAGAAGAAGAAGAAGAAGAAGAAG	AAGAAGAAGAAGAAGAAGAAGAAGAAG/AAGAAGAAGAAGAAGAAGAAGAAGAAG	AAGAAGAAGAAGAAGAAGAAGAAGAAGAAGAAGAAGAAGAAGAAG/AAGAAGAAGAAGAAGAAGAAGAAGAAGAAGAAGAAGAAGAAGAAGAAG	AAGAAGAAGAAGAAGAAGAAGAAGAAGAAGAAGAAGAAGAAGAAGAAG/AAGAAGAAGAAGAAGAAGAAGAAGAAGAAGAAGAAGAAGAAGAAGAAGAAGAAGAAGAAG	AAGAAGAAGAAGAAGAAGAAGAAGAAGAAGAAG/AAGAAGAAGAAGAAGAAGAAGAAGAAGAAGAAGAAG	AAGAAGAAGAAGAAGAAG/AAGAAGAAGAAGAAGAAG	AAGAAGAAGAAGAAGAAGAAGAAGAAGAAGAAG/AAGAAGAAGAAGAAGAAGAAGAAGAAGAAGAAGAAG	AAGAAGAAGAAG/AAGAAGAAGAAGAAGAAGAAGAAGAAGAAGAAGAAG	AAGAAGAAGAAGAAGAAGAAGAAGAAGAAGAAGAAGAAGAAGAAGAAGAAGAAGAAGAAG/AAGAAGAAGAAGAAGAAGAAGAAGAAGAAGAAGAAGAAGAAGAAGAAGAAGAAGAAGAAGAAG	AAGAAGAAGAAGAAGAAGAAGAAGAAGAAGAAGAAGAAGAAG/AAGAAGAAGAAGAAGAAGAAGAAGAAGAAGAAGAAGAAGAAG	AAGAAGAAGAAGAAGAAG/AAGAAGAAGAAGAAGAAG	AAGAAGAAGAAGAAGAAG/AAGAAGAAGAAGAAGAAGAAGAAGAAGAAGAAGAAGAAG	AAGAAGAAGAAGAAG/AAGAAGAAGAAGAAG	AAGAAGAAGAAGAAG/AAGAAGAAGAAGAAG	AAGAAGAAGAAGAAGAAG/AAGAAGAAGAAGAAGAAGAAGAAGAAGAAG	AAGAAGAAGAAGAAGAAGAAGAAGAAGAAGAAGAAGAAGAAGAAGAAGAAGAAGAAG/AAGAAGAAGAAGAAGAAGAAGAAGAAGAAGAAGAAGAAGAAGAAGAAGAAGAAGAAGAAG	AAGAAGAAGAAGAAGAAGAAGAAGAAGAAGAAGAAGAAGAAG/AAGAAGAAGAAGAAGAAGAAGAAGAAGAAGAAGAAGAAGAAG	AAGAAGAAGAAGAAGAAGAAGAAGAAGAAGAAGAAGAAGAAGAAGAAGAAGAAG/AAGAAGAAGAAGAAGAAGAAGAAGAAGAAGAAGAAGAAGAAGAAGAAGAAGAAGAAG	AAGAAGAAGAAGAAGAAGAAGAAGAAGAAG/AAGAAGAAGAAGAAGAAGAAGAAGAAGAAG	AAGAAGAAGAAGAAGAAGAAGAAGAAGAAGAAGAAGAAGAAG/AAGAAGAAGAAGAAGAAGAAGAAGAAGAAGAAGAAGAAGAAG	AAGAAGAAGAAGAAG/AAGAAGAAGAAGAAGAAGAAGAAGAAGAAGAAGAAGAAG	AAGAAGAAGAAGAAGAAG/AAGAAGAAGAAGAAGAAG	AAGAAGAAGAAGAAGAAGAAGAAGAAGAAGAAG/AAGAAGAAGAAGAAGAAGAAGAAGAAGAAGAAGAAG	AAGAAGAAGAAGAAG/AAGAAGAAGAAGAAG	AAGAAGAAGAAGAAGAAGAAGAAGAAGAAGAAGAAG/AAGAAGAAGAAGAAGAAGAAGAAGAAGAAGAAGAAGAAG	AAGAAGAAGAAGAAGAAGAAGAAGAAGAAGAAG/AAGAAGAAGAAGAAGAAGAAGAAGAAGAAGAAGAAG	AAGAAGAAGAAGAAGAAGAAGAAGAAG/AAGAAGAAGAAGAAGAAGAAGAAGAAG	AAGAAGAAGAAGAAGAAG/AAGAAGAAGAAGAAGAAG	AAGAAGAAGAAGAAG/AAGAAGAAGAAGAAGAAGAAGAAGAAGAAGAAG	AAGAAGAAGAAGAAGAAGAAGAAGAAGAAGAAGAAGAAGAAGAAG/AAGAAGAAGAAGAAGAAGAAGAAGAAGAAGAAGAAGAAGAAGAAGAAGAAGAAGAAGAAGAAGAAGAAGAAG	AAGAAGAAGAAGAAG/AAGAAGAAGAAGAAG	AAGAAGAAGAAGAAGAAGAAGAAG/AAGAAGAAGAAGAAGAAGAAGAAGAAG	AAGAAGAAGAAGAAG/AAGAAGAAGAAGAAG	AAGAAGAAGAAGAAGAAGAAGAAGAAGAAGAAG/AAGAAGAAGAAGAAGAAGAAGAAGAAGAAGAAGAAG	AAGAAGAAGAAGAAGAAGAAGAAGAAGAAGAAGAAGAAGAAGAAGAAGAAGAAGAAGAAG/AAGAAGAAGAAGAAGAAGAAGAAGAAGAAGAAGAAGAAGAAGAAGAAGAAGAAGAAGAAGAAG	AAGAAGAAGAAGAAGAAGAAG/AAGAAGAAGAAGAAGAAGAAGAAGAAGAAGAAGAAGAAGAAGAAGAAGAAGAAGAAGAAG	AAGAAGAAGAAGAAG/AAGAAGAAGAAGAAG
Xunr121	6	53515296	TACTGTGTACCCTCCGCTGCCGCGCAACTGTTCAGCTATC	60.333	TTCGTTTCCTTGTCCGAACGGGCGGCCGCCGGGGACGACG	66.479	AACACAACACAACACAACAC	AACACAACAC;AACACAACACAACAC;AACACAACACAACACAACACAACAC;AACACAACACAACACAACACAACACAACAC;AACACAACACAACACAACACAACACAACACAACAC;AACACAACACAACACAACACAACACAACACAACACAACAC;AACACAACACAACACAACACAACACAACACAACACAACACAACAC	AACACAACAC/AACACAACACAACACAACAC	AACACAACACAACACAACACAACACAACACAACAC/AACACAACACAACACAACACAACACAACACAACAC	AACACAACACAACACAACAC/AACACAACACAACACAACAC	AACACAACACAACACAACACAACACAACACAACAC/AACACAACACAACACAACACAACACAACACAACAC	AACACAACACAACACAACACAACAC/AACACAACACAACACAACACAACAC	AACACAACACAACACAACAC/AACACAACACAACACAACAC	AACACAACACAACAC/AACACAACACAACAC	AACACAACACAACACAACACAACAC/AACACAACACAACACAACACAACAC	AACACAACACAACACAACAC/AACACAACACAACACAACAC	AACACAACACAACACAACAC/AACACAACACAACACAACAC	AACACAACACAACACAACAC/AACACAACACAACACAACAC	AACACAACACAACAC/AACACAACACAACAC	AACACAACACAACACAACACAACAC/AACACAACACAACACAACACAACAC	AACACAACACAACACAACAC/AACACAACACAACACAACACAACACAACAC	AACACAACACAACAC/AACACAACACAACAC	AACACAACACAACACAACAC/AACACAACACAACACAACAC	AACACAACACAACAC/AACACAACACAACACAACAC	AACACAACACAACAC/AACACAACACAACAC	AACACAACACAACAC/AACACAACACAACAC	AACACAACACAACAC/AACACAACACAACAC	AACACAACACAACAC/AACACAACACAACAC	AACACAACACAACACAACAC/AACACAACACAACACAACAC	AACACAACACAACACAACAC/AACACAACACAACACAACAC	AACACAACACAACACAACAC/AACACAACACAACACAACAC	AACACAACACAACACAACAC/AACACAACACAACACAACAC	AACACAACACAACACAACAC/AACACAACACAACACAACAC	AACACAACACAACACAACAC/AACACAACACAACACAACAC	AACACAACACAACACAACAC/AACACAACACAACACAACAC	AACACAACACAACACAACAC/AACACAACACAACACAACAC	AACACAACACAACACAACAC/AACACAACACAACACAACAC	AACACAACACAACAC/AACACAACACAACAC	AACACAACACAACACAACACAACAC/AACACAACACAACACAACACAACAC	AACACAACACAACACAACAC/AACACAACACAACACAACAC	AACACAACACAACACAACAC/AACACAACACAACACAACAC	AACACAACACAACAC/AACACAACACAACAC	AACACAACACAACACAACAC/AACACAACACAACACAACAC	AACACAACAC/AACACAACAC	AACACAACACAACACAACAC/AACACAACACAACACAACAC	AACACAACACAACACAACAC/AACACAACACAACACAACAC	AACACAACACAACACAACAC/AACACAACACAACACAACAC	AACACAACACAACAC/AACACAACACAACAC
Xunr122	6	53758771	TTAATTAATTAGGCAGTGCCATATATATAATCATCAGCTG	47.191	TCACTACTACTGCATTCGTCTGCAGTTAGAATGATGTAAC	51.931	TCTCTCTCTCTCTCTCTCTCTCTC	TCTCTCTCTC;TCTCTCTCTCTC;TCTCTCTCTCTCTC;TCTCTCTCTCTCTCTC;TCTCTCTCTCTCTCTCTC;TCTCTCTCTCTCTCTCTCTC;TCTCTCTCTCTCTCTCTCTCTC;TCTCTCTCTCTCTCTCTCTCTCTCTC;TCTCTCTCTCTCTCTCTCTCTCTCTCTC;TCTCTCTCTCTCTCTCTCTCTCTCTCTCTC;TCTCTCTCTCTCTCTCTCTCTCTCTCTCTCTC;TCTCTCTCTCTCTCTCTCTCTCTCTCTCTCTCTC;TCTCTCTCTCTCTCTCTCTCTCTCTCTCTCTCTCTC;TCTCTCTCTCTCTCTCTCTCTCTCTCTCTCTCTCTCTC;TCTCTCTCTCTCTCTCTCTCTCTCTCTCTCTCTCTCTCTC;TCTCTCTC…	TCTCTCTCTCTCTCTCTCTC/TCTCTCTCTCTCTCTCTCTCTC	TCTCTCTCTCTCTCTCTCTCTC/TCTCTCTCTCTCTCTCTCTCTCTC	TCTCTCTCTCTCTCTCTCTCTC/TCTCTCTCTCTCTCTCTCTCTCTC	./.	./.	./.	TCTCTCTCTCTCTCTCTCTCTCTCTC/TCTCTCTCTCTCTCTCTCTCTCTCTCTC	TCTCTCTCTCTCTCTCTCTCTC/TCTCTCTCTCTCTCTCTCTCTC	TCTCTCTCTCTCTCTCTCTCTC/TCTCTCTCTCTCTCTCTCTCTCTC	TCTCTCTCTCTCTCTCTC/TCTCTCTCTCTCTCTCTC	TCTCTCTCTCTCTCTCTCTCTCTC/TCTCTCTCTCTCTCTCTCTCTCTCTC	TCTCTCTCTCTCTCTCTCTCTC/TCTCTCTCTCTCTCTCTCTCTCTC	TCTCTCTCTCTCTCTCTCTC/TCTCTCTCTCTCTCTCTCTCTCTCTCTCTCTCTCTCTCTCTC	TCTCTCTCTCTCTCTCTCTCTCTC/TCTCTCTCTCTCTCTCTCTCTCTCTCTC	TCTCTCTCTCTCTCTCTCTCTCTC/TCTCTCTCTCTCTCTCTCTCTCTC	TCTCTCTCTCTCTCTCTCTCTCTC/TCTCTCTCTCTCTCTCTCTCTCTCTC	TCTCTCTCTCTCTCTCTCTCTC/TCTCTCTCTCTCTCTCTCTCTCTC	TCTCTCTCTCTCTCTCTCTCTC/TCTCTCTCTCTCTCTCTCTCTCTC	TCTCTCTCTCTCTCTCTCTCTC/TCTCTCTCTCTCTCTCTCTCTCTC	TCTCTCTCTCTCTCTCTCTCTC/TCTCTCTCTCTCTCTCTCTCTCTC	TCTCTCTCTCTCTCTCTCTCTCTCTC/TCTCTCTCTCTCTCTCTCTCTCTCTCTC	TCTCTCTCTCTCTCTCTCTCTC/TCTCTCTCTCTCTCTCTCTCTCTC	TCTCTCTCTCTCTCTCTCTCTC/TCTCTCTCTCTCTCTCTCTCTCTC	TCTCTCTCTCTCTCTCTCTCTC/TCTCTCTCTCTCTCTCTCTCTCTC	TCTCTCTCTCTCTCTCTCTCTC/TCTCTCTCTCTCTCTCTCTCTCTC	TCTCTCTCTCTCTCTCTCTCTC/TCTCTCTCTCTCTCTCTCTCTCTC	TCTCTCTCTCTCTCTCTCTCTC/TCTCTCTCTCTCTCTCTCTCTCTC	TCTCTCTCTCTCTCTCTCTCTC/TCTCTCTCTCTCTCTCTCTCTCTC	TCTCTCTCTCTCTCTCTCTCTC/TCTCTCTCTCTCTCTCTCTCTCTC	./.	TCTCTCTCTC/TCTCTCTCTCTCTCTCTCTCTCTCTC	TCTCTCTCTCTCTCTCTCTCTCTCTCTCTCTCTCTCTCTC/TCTCTCTCTCTCTCTCTCTCTCTCTCTCTCTCTCTCTCTCTC	TCTCTCTCTCTCTCTCTCTCTC/TCTCTCTCTCTCTCTCTCTCTCTC	TCTCTCTCTCTCTCTCTCTC/TCTCTCTCTCTCTCTCTCTCTC	TCTCTCTCTCTCTCTCTCTC/TCTCTCTCTCTCTCTCTCTCTC	TCTCTCTCTCTCTCTCTCTCTC/TCTCTCTCTCTCTCTCTCTCTCTC	TCTCTCTCTCTCTCTCTCTC/TCTCTCTCTCTCTCTCTCTCTC	TCTCTCTCTCTCTCTCTCTCTC/TCTCTCTCTCTCTCTCTCTCTCTC	TCTCTCTCTCTCTCTCTCTCTCTC/TCTCTCTCTCTCTCTCTCTCTCTCTC	TCTCTCTCTCTCTCTCTCTCTCTC/TCTCTCTCTCTCTCTCTCTCTCTCTC	TCTCTCTCTCTCTCTCTCTCTC/TCTCTCTCTCTCTCTCTCTCTCTC
Xunr123	6	54624504	TCTGTATGCACCAAATCAGGACGACGCGAGCCTCCGCAAG	60.637	GGTGCCGGCTTGACCTCGCGCCGTCCGCTGATCAGTTTGC	65.089	GAGAGAGAGAGAGAGAGAGAGAGAG	GAGAGAGAGAG;GAGAGAGAGAGAGAG;GAGAGAGAGAGAGAGAG;GAGAGAGAGAGAGAGAGAG;GAGAGAGAGAGAGAGAGAGAG;GAGAGAGAGAGAGAGAGAGAGAG;GAGAGAGAGAGAGAGAGAGAGAGAGAG	./.	GAGAGAGAGAGAGAGAGAGAG/GAGAGAGAGAGAGAGAGAGAG	GAGAGAGAGAGAGAGAGAGAGAG/GAGAGAGAGAGAGAGAGAGAGAGAG	./.	./.	GAGAGAGAGAGAGAGAGAGAG/GAGAGAGAGAGAGAGAGAGAG	./.	GAGAGAGAGAGAGAGAGAGAGAG/GAGAGAGAGAGAGAGAGAGAGAG	GAGAGAGAGAG/GAGAGAGAGAGAGAGAGAGAG	./.	GAGAGAGAGAGAGAGAGAGAGAG/GAGAGAGAGAGAGAGAGAGAGAGAG	GAGAGAGAGAGAGAGAGAGAG/GAGAGAGAGAGAGAGAGAGAGAG	./.	GAGAGAGAGAGAGAGAGAG/GAGAGAGAGAGAGAGAGAGAGAGAG	GAGAGAGAGAGAGAGAGAGAG/GAGAGAGAGAGAGAGAGAGAGAG	GAGAGAGAGAGAGAGAGAGAGAG/GAGAGAGAGAGAGAGAGAGAGAGAG	./.	./.	GAGAGAGAGAGAGAGAGAGAG/GAGAGAGAGAGAGAGAGAGAGAG	./.	GAGAGAGAGAGAGAGAGAGAGAG/GAGAGAGAGAGAGAGAGAGAGAGAG	GAGAGAGAGAGAGAGAGAGAGAG/GAGAGAGAGAGAGAGAGAGAGAGAG	GAGAGAGAGAGAGAGAGAGAGAG/GAGAGAGAGAGAGAGAGAGAGAGAG	GAGAGAGAGAGAGAGAGAGAGAG/GAGAGAGAGAGAGAGAGAGAGAGAG	GAGAGAGAGAGAGAGAGAGAGAG/GAGAGAGAGAGAGAGAGAGAGAGAG	GAGAGAGAGAGAGAGAGAGAGAG/GAGAGAGAGAGAGAGAGAGAGAGAG	GAGAGAGAGAGAGAGAGAGAGAG/GAGAGAGAGAGAGAGAGAGAGAGAG	GAGAGAGAGAGAGAGAGAGAGAG/GAGAGAGAGAGAGAGAGAGAGAGAG	GAGAGAGAGAGAGAGAGAGAGAG/GAGAGAGAGAGAGAGAGAGAGAGAG	./.	GAGAGAGAGAGAGAGAGAGAG/GAGAGAGAGAGAGAGAGAGAGAG	GAGAGAGAGAGAGAGAGAGAGAGAG/GAGAGAGAGAGAGAGAGAGAGAGAGAG	GAGAGAGAGAGAGAGAGAGAGAG/GAGAGAGAGAGAGAGAGAGAGAGAG	GAGAGAGAGAGAGAGAGAGAGAG/GAGAGAGAGAGAGAGAGAGAGAGAG	GAGAGAGAGAGAGAGAGAG/GAGAGAGAGAGAGAGAGAGAGAGAG	GAGAGAGAGAGAGAGAGAG/GAGAGAGAGAGAGAGAGAGAGAG	./.	GAGAGAGAGAGAGAGAGAGAGAG/GAGAGAGAGAGAGAGAGAGAGAGAG	GAGAGAGAGAGAGAGAGAGAGAG/GAGAGAGAGAGAGAGAGAGAGAGAG	GAGAGAGAGAGAGAGAGAGAGAG/GAGAGAGAGAGAGAGAGAGAGAGAG	./.
Xunr124	6	55414759	GAGCTATTTTGCCAAACGTTTTCTAGAATGGCTTCAGCTC	53.724	TCTTTTCATCATGGTCTGTTTGGCAGGGTTATGGCTCCTC	55.596	AGCCAGAGCCAGAGCGAGAGCCAGAGCTAGAG	AGCCAGAGCCAGAGCGAGAGCCAGAGCTAG;AGCCAGAGCCAGAGCGAGAGCCAGAGCTAGA	./.	AGCCAGAGCCAGAGCGAGAGCCAGAGCTAGAG/AGCCAGAGCCAGAGCGAGAGCCAGAGCTAGAG	AGCCAGAGCCAGAGCGAGAGCCAGAGCTAGAG/AGCCAGAGCCAGAGCGAGAGCCAGAGCTAGAG	AGCCAGAGCCAGAGCGAGAGCCAGAGCTAG/AGCCAGAGCCAGAGCGAGAGCCAGAGCTAGAG	AGCCAGAGCCAGAGCGAGAGCCAGAGCTAGA/AGCCAGAGCCAGAGCGAGAGCCAGAGCTAGAG	AGCCAGAGCCAGAGCGAGAGCCAGAGCTAGAG/AGCCAGAGCCAGAGCGAGAGCCAGAGCTAGAG	AGCCAGAGCCAGAGCGAGAGCCAGAGCTAGAG/AGCCAGAGCCAGAGCGAGAGCCAGAGCTAGAG	./.	AGCCAGAGCCAGAGCGAGAGCCAGAGCTAGAG/AGCCAGAGCCAGAGCGAGAGCCAGAGCTAGAG	./.	AGCCAGAGCCAGAGCGAGAGCCAGAGCTAGAG/AGCCAGAGCCAGAGCGAGAGCCAGAGCTAGAG	AGCCAGAGCCAGAGCGAGAGCCAGAGCTAGAG/AGCCAGAGCCAGAGCGAGAGCCAGAGCTAGAG	AGCCAGAGCCAGAGCGAGAGCCAGAGCTAGAG/AGCCAGAGCCAGAGCGAGAGCCAGAGCTAGAG	AGCCAGAGCCAGAGCGAGAGCCAGAGCTAGAG/AGCCAGAGCCAGAGCGAGAGCCAGAGCTAGAG	AGCCAGAGCCAGAGCGAGAGCCAGAGCTAGAG/AGCCAGAGCCAGAGCGAGAGCCAGAGCTAGAG	AGCCAGAGCCAGAGCGAGAGCCAGAGCTAGAG/AGCCAGAGCCAGAGCGAGAGCCAGAGCTAGAG	./.	./.	AGCCAGAGCCAGAGCGAGAGCCAGAGCTAGAG/AGCCAGAGCCAGAGCGAGAGCCAGAGCTAGAG	AGCCAGAGCCAGAGCGAGAGCCAGAGCTAGAG/AGCCAGAGCCAGAGCGAGAGCCAGAGCTAGAG	AGCCAGAGCCAGAGCGAGAGCCAGAGCTAGAG/AGCCAGAGCCAGAGCGAGAGCCAGAGCTAGAG	AGCCAGAGCCAGAGCGAGAGCCAGAGCTAGAG/AGCCAGAGCCAGAGCGAGAGCCAGAGCTAGAG	AGCCAGAGCCAGAGCGAGAGCCAGAGCTAGAG/AGCCAGAGCCAGAGCGAGAGCCAGAGCTAGAG	AGCCAGAGCCAGAGCGAGAGCCAGAGCTAGAG/AGCCAGAGCCAGAGCGAGAGCCAGAGCTAGAG	AGCCAGAGCCAGAGCGAGAGCCAGAGCTAGAG/AGCCAGAGCCAGAGCGAGAGCCAGAGCTAGAG	AGCCAGAGCCAGAGCGAGAGCCAGAGCTAGAG/AGCCAGAGCCAGAGCGAGAGCCAGAGCTAGAG	AGCCAGAGCCAGAGCGAGAGCCAGAGCTAGAG/AGCCAGAGCCAGAGCGAGAGCCAGAGCTAGAG	AGCCAGAGCCAGAGCGAGAGCCAGAGCTAGAG/AGCCAGAGCCAGAGCGAGAGCCAGAGCTAGAG	AGCCAGAGCCAGAGCGAGAGCCAGAGCTAGAG/AGCCAGAGCCAGAGCGAGAGCCAGAGCTAGAG	AGCCAGAGCCAGAGCGAGAGCCAGAGCTAGAG/AGCCAGAGCCAGAGCGAGAGCCAGAGCTAGAG	./.	./.	AGCCAGAGCCAGAGCGAGAGCCAGAGCTAGAG/AGCCAGAGCCAGAGCGAGAGCCAGAGCTAGAG	AGCCAGAGCCAGAGCGAGAGCCAGAGCTAGAG/AGCCAGAGCCAGAGCGAGAGCCAGAGCTAGAG	AGCCAGAGCCAGAGCGAGAGCCAGAGCTAGAG/AGCCAGAGCCAGAGCGAGAGCCAGAGCTAGAG	AGCCAGAGCCAGAGCGAGAGCCAGAGCTAGAG/AGCCAGAGCCAGAGCGAGAGCCAGAGCTAGAG	./.	AGCCAGAGCCAGAGCGAGAGCCAGAGCTAGAG/AGCCAGAGCCAGAGCGAGAGCCAGAGCTAGAG	AGCCAGAGCCAGAGCGAGAGCCAGAGCTAGAG/AGCCAGAGCCAGAGCGAGAGCCAGAGCTAGAG	AGCCAGAGCCAGAGCGAGAGCCAGAGCTAGAG/AGCCAGAGCCAGAGCGAGAGCCAGAGCTAGAG	./.
Xunr125	6	56200505	CCATCAGGAATGTCGTAACTAGCATCACTATAACCACTGC	53.332	CTGCATAATGCATCAGACAACACTTAACCGTCAGCTTTTC	53.746	CATTCATTCATTCATTCATTCATTCATTCATTCA	CATTCATTCATTCATTCATTCATTCATTCATTCA;CATTCATTCATTC;CATTCATTCATTCA;CATTCATTCATTCAT;CATTCATTCATTCATTCA;CATTCATTCATTCATTCATTCA;CATTCATTCATTCATTCATTCATTCA;CATTCATTCATTCATTCATTCATTCATTCA;CATTCATTCATTCATTCATTCATTCATTCATTCATTCA;CATTCATTCATTCATTCATTCATTCATTCATTCATTCATTCA;CATTCATTCATTCATTCATTCATTCATTCATTCATTCATTCATTC;CATTCATTCATTCATTCATTCATTCATTCATTCATTCATTCATTCA;CATTCATTCATTCATTCATTCATTCATTCATTCATTCATTCATT…	CATTCATTCATTCATTCATTCATTCA/CATTCATTCATTCATTCATTCATTCA	CATTCATTCATTCATTCA/CATTCATTCATTCATTCATTCATTCATTCATTCA	CATTCATTCATTCATTCA/CATTCATTCATTCATTCATTCA	CATTCATTCATTCA/CATTCATTCATTCA	CATTCATTCATTCATTCA/CATTCATTCATTCATTCATTCA	CATTCATTCATTCA/CATTCATTCATTCA	CATTCATTCATTCATTCA/CATTCATTCATTCATTCATTCA	CATTCATTCATTCATTCATTCA/CATTCATTCATTCATTCATTCA	CATTCATTCATTCA/CATTCATTCATTCA	CATTCATTCATTCA/CATTCATTCATTCA	CATTCATTCATTCATTCATTCATTCA/CATTCATTCATTCATTCATTCATTCATTCA	CATTCATTCATTC/CATTCATTCATTCATTCATTCATTCATTCATTCA	CATTCATTCATTCA/CATTCATTCATTCA	CATTCATTCATTCATTCA/CATTCATTCATTCATTCATTCATTCATTCA	CATTCATTCATTCA/CATTCATTCATTCATTCATTCATTCATTCATTCA	CATTCATTCATTCA/CATTCATTCATTCATTCATTCATTCATTCA	CATTCATTCATTCATTCATTCATTCA/CATTCATTCATTCATTCATTCATTCA	CATTCATTCATTCATTCA/CATTCATTCATTCATTCA	CATTCATTCATTCATTCATTCATTCATTCATTCA/CATTCATTCATTCATTCATTCATTCATTCATTCA	CATTCATTCATTCA/CATTCATTCATTCA	CATTCATTCATTCATTCATTCA/CATTCATTCATTCATTCATTCATTCATTCATTCA	CATTCATTCATTCATTCATTCATTCATTCATTCA/CATTCATTCATTCATTCATTCATTCATTCATTCA	CATTCATTCATTCATTCA/CATTCATTCATTCATTCA	CATTCATTCATTCATTCA/CATTCATTCATTCATTCATTCATTCATTCA	CATTCATTCATTCATTCATTCATTCATTCATTCA/CATTCATTCATTCATTCATTCATTCATTCATTCA	CATTCATTCATTCATTCATTCATTCA/CATTCATTCATTCATTCATTCATTCATTCATTCATTCA	CATTCATTCATTCATTCATTCATTCATTCATTCA/CATTCATTCATTCATTCATTCATTCATTCATTCA	CATTCATTCATTCATTCA/CATTCATTCATTCATTCATTCATTCATTCATTCATTCA	CATTCATTCATTCATTCATTCATTCATTCATTCA/CATTCATTCATTCATTCATTCATTCATTCATTCA	CATTCATTCATTCA/CATTCATTCATTCA	CATTCATTCATTCATTCA/CATTCATTCATTCATTCATTCA	CATTCATTCATTCATTCATTCA/CATTCATTCATTCATTCATTCA	CATTCATTCATTCA/CATTCATTCATTCA	CATTCATTCATTCATTCATTCATTCATTCATTCA/CATTCATTCATTCATTCATTCATTCATTCATTCA	CATTCATTCATTCA/CATTCATTCATTCA	CATTCATTCATTCA/CATTCATTCATTCA	CATTCATTCATTCATTCATTCATTCATTCA/CATTCATTCATTCATTCATTCATTCATTCA	CATTCATTCATTCATTCATTCATTCATTCATTCA/CATTCATTCATTCATTCATTCATTCATTCATTCA	CATTCATTCATTCATTCA/CATTCATTCATTCATTCATTCATTCATTCATTCA	CATTCATTCATTCATTCA/CATTCATTCATTCATTCATTCATTCATTCATTCA	CATTCATTCATTCATTCA/CATTCATTCATTCATTCA
Xunr126	6	56777479	GGATCGTGAGGGTGGCCGTGACGAGGCCCAGGGTTTCCAG	63.526	CGTCGAACTTGACGTACCTCAGATGATCCACGACCTGCAC	58.18	GAGGAGAAGGAGGAGGAGGAGGAGGAGGAGGAGG	GAGGAGAAGGA;GAGGAGAAGGAGG;GAGGAGAAGGAGGAGG;GAGGAGAAGGAGGAGGAGG;GAGGAGAAGGAGGAGGAGGAGG;GAGGAGAAGGAGGAGGAGGAGGAGG;GAGGAGAAGGAGGAGGAGGAGGAGGA;GAGGAGAAGGAGGAGGAGGAGGAGGAGG;GAGGAGAAGGAGGAGGAGGAGGAGGAGGA;GAGGAGAAGGAGGAGGAGGAGGAGGAGGAGG;GAGGAGAAGGAGGAGGAGGAGGAGGAGGAGGAG;GAGGAGAAGGAGGAGGAGGAGGAGGAGGAGGAGGAGG	GAGGAGAAGGAGG/GAGGAGAAGGAGGAGGAGGAGGAGGAGGAGG	GAGGAGAAGGAGGAGG/GAGGAGAAGGAGGAGGAGGAGGAGGAGG	GAGGAGAAGGAGGAGGAGGAGGAGGAGGAGGAGG/GAGGAGAAGGAGGAGGAGGAGGAGGAGGAGGAGG	./.	GAGGAGAAGGAGGAGGAGGAGGAGGAGGAGGAGG/GAGGAGAAGGAGGAGGAGGAGGAGGAGGAGGAGG	GAGGAGAAGGAGGAGGAGGAGGAGGAGG/GAGGAGAAGGAGGAGGAGGAGGAGGAGG	./.	GAGGAGAAGGAGGAGGAGG/GAGGAGAAGGAGGAGGAGG	./.	GAGGAGAAGGAGGAGGAGGAGGAGGAGGAGGAGG/GAGGAGAAGGAGGAGGAGGAGGAGGAGGAGGAGG	GAGGAGAAGGAGGAGGAGGAGGAGGAGGAGGAGG/GAGGAGAAGGAGGAGGAGGAGGAGGAGGAGGAGG	GAGGAGAAGGAGGAGGAGGAGGAGGAGGAGGAGG/GAGGAGAAGGAGGAGGAGGAGGAGGAGGAGGAGG	GAGGAGAAGGAGGAGGAGG/GAGGAGAAGGAGGAGGAGG	GAGGAGAAGGAGGAGG/GAGGAGAAGGAGGAGG	GAGGAGAAGGAGGAGGAGG/GAGGAGAAGGAGGAGGAGG	GAGGAGAAGGAGGAGGAGGAGGAGGAGGAGGAG/GAGGAGAAGGAGGAGGAGGAGGAGGAGGAGGAGG	GAGGAGAAGGAGGAGGAGGAGGAGGAGGAGGAGG/GAGGAGAAGGAGGAGGAGGAGGAGGAGGAGGAGG	GAGGAGAAGGAGGAGGAGGAGGAGGAGGAGGAGG/GAGGAGAAGGAGGAGGAGGAGGAGGAGGAGGAGG	GAGGAGAAGGAGGAGGAGGAGGAGGAGGAGGAGG/GAGGAGAAGGAGGAGGAGGAGGAGGAGGAGGAGG	./.	GAGGAGAAGGAGGAGGAGGAGGAGGAGG/GAGGAGAAGGAGGAGGAGGAGGAGGAGGAGGAGG	GAGGAGAAGGAGGAGGAGGAGGAGGAGGAGGAGG/GAGGAGAAGGAGGAGGAGGAGGAGGAGGAGGAGG	GAGGAGAAGGAGGAGGAGGAGGAGGAGGAGGAGG/GAGGAGAAGGAGGAGGAGGAGGAGGAGGAGGAGG	GAGGAGAAGGAGGAGGAGGAGGAGGAGGAGG/GAGGAGAAGGAGGAGGAGGAGGAGGAGGAGG	GAGGAGAAGGAGGAGGAGGAGGAGGAGGAGGAGG/GAGGAGAAGGAGGAGGAGGAGGAGGAGGAGGAGG	./.	GAGGAGAAGGAGGAGGAGG/GAGGAGAAGGAGGAGGAGG	GAGGAGAAGGAGGAGGAGGAGGAGGAGGAGGAGG/GAGGAGAAGGAGGAGGAGGAGGAGGAGGAGGAGG	GAGGAGAAGGAGGAGGAGGAGGAGGAGGAGGAGG/GAGGAGAAGGAGGAGGAGGAGGAGGAGGAGGAGG	./.	GAGGAGAAGGAGGAGGAGG/GAGGAGAAGGAGGAGGAGGAGGAGGAGGAGGAGG	GAGGAGAAGGAGGAGGAGG/GAGGAGAAGGAGGAGGAGG	GAGGAGAAGGAGGAGGAGGAGGAGGAGGAGG/GAGGAGAAGGAGGAGGAGGAGGAGGAGGAGGAGG	GAGGAGAAGGAGGAGGAGGAGGAGGAGGAGGAGG/GAGGAGAAGGAGGAGGAGGAGGAGGAGGAGGAGG	./.	GAGGAGAAGGAGGAGGAGGAGGAGGAGGAGGAGG/GAGGAGAAGGAGGAGGAGGAGGAGGAGGAGGAGG	GAGGAGAAGGAGGAGGAGGAGGAGGAGG/GAGGAGAAGGAGGAGGAGGAGGAGGAGGAGG	GAGGAGAAGGAGGAGGAGGAGGAGGAGGAGGAGG/GAGGAGAAGGAGGAGGAGGAGGAGGAGGAGGAGGAGG	GAGGAGAAGGAGGAGGAGGAGGAGGAGGAGGAGG/GAGGAGAAGGAGGAGGAGGAGGAGGAGGAGGAGG	GAGGAGAAGGAGGAGGAGGAGGAGGAGGAGGAGG/GAGGAGAAGGAGGAGGAGGAGGAGGAGGAGGAGG	GAGGAGAAGGAGGAGGAGGAGGAGGAGGAGGAGG/GAGGAGAAGGAGGAGGAGGAGGAGGAGGAGGAGG
Xunr127	6	58737250	AGCTCGGCCACAGCACCGGGCGTCACGGGCAGGCAACACC	67.804	TATCAAGGACCATACTGGAGTTGTAACAGCAAAACCTCTG	52.89	TGCTAGTGCTAGTGCTA	TGCTAGTGCTA	./.	./.	./.	./.	./.	./.	./.	./.	./.	./.	./.	TGCTAGTGCTAGTGCTA/TGCTAGTGCTAGTGCTA	./.	./.	./.	./.	./.	./.	./.	./.	./.	./.	./.	./.	TGCTAGTGCTAGTGCTA/TGCTAGTGCTAGTGCTA	./.	./.	./.	./.	./.	./.	./.	./.	./.	./.	./.	./.	./.	./.	./.	./.
Xunr128	7	3355242	TCCGGACACTGGAGACAACACCCGCACACATGGTTCATGC	60.642	AACGCAATCTCTTCCGTCTCGCTTGAGCCCCTCCACTCAC	60.129	AATAAAATAAAATAAAATAAAATAAAATAAAATAA	AATAAAATAAAATAAAATAAAATAAAATAAAATAA;AATAAAATAAAATAA;AATAAAATAAAATAAA;AATAAAATAAAATAAAATAA;AATAAAATAAAATAAAATAAA;AATAAAATAAAATAAAATAAAATAA;AATAAAATAAAATAAAATAAAATAAAATAA;AATAAAATAAAATAAAATAAAATAAAATAAAATAAAATAA;AATAAAATAAAATAAAATAAAATAAAATAAAATAAAATAAAATAAAAT;AATAAAATAAAATAAAATAAAATAAAATAAAATAAAATAAAATAAAATAAA;AATAAAATAAAATAAAATAAAATAAAATAAAATAAAATAAAATAAAATAAAATAAA;AATAAAATAAAATAAAATAAAATAAAATAAA…	AATAAAATAAAATAAAATAAA/AATAAAATAAAATAAAATAAA	AATAAAATAAAATAAAATAAAATAAAATAAAATAA/AATAAAATAAAATAAAATAAAATAAAATAAAATAA	AATAAAATAAAATAAAATAAAATAA/AATAAAATAAAATAAAATAAAATAAAATAAAATAA	AATAAAATAAAATAAAATAAAATAAAATAAAATAA/AATAAAATAAAATAAAATAAAATAAAATAAAATAA	AATAAAATAAAATAAAATAAAATAAAATAAAATAA/AATAAAATAAAATAAAATAAAATAAAATAAAATAA	AATAAAATAAAATAAAATAA/AATAAAATAAAATAAAATAA	AATAAAATAAAATAAAATAAAATAAAATAAAATAA/AATAAAATAAAATAAAATAAAATAAAATAAAATAA	AATAAAATAAAATAAAATAAAATAAAATAAAATAAAATAA/AATAAAATAAAATAAAATAAAATAAAATAAAATAAAATAA	AATAAAATAAAATAAAATAAAATAAAATAAAATAA/AATAAAATAAAATAAAATAAAATAAAATAAAATAA	AATAAAATAAAATAAAATAAAATAAAATAAAATAA/AATAAAATAAAATAAAATAAAATAAAATAAAATAA	AATAAAATAAAATAAAATAAAATAAAATAAAATAA/AATAAAATAAAATAAAATAAAATAAAATAAAATAA	AATAAAATAAAATAAAATAAAATAAAATAAAATAA/AATAAAATAAAATAAAATAAAATAAAATAAAATAA	AATAAAATAAAATAAAATAAAATAA/AATAAAATAAAATAAAATAAAATAA	AATAAAATAAAATAAAATAAAATAA/AATAAAATAAAATAAAATAAAATAA	AATAAAATAAAATAAAATAAAATAAAATAAAATAA/AATAAAATAAAATAAAATAAAATAAAATAAAATAA	AATAAAATAAAATAAAATAAAATAAAATAAAATAA/AATAAAATAAAATAAAATAAAATAAAATAAAATAA	AATAAAATAAAATAAAATAAAATAAAATAAAATAAAATAA/AATAAAATAAAATAAAATAAAATAAAATAAAATAAAATAA	AATAAAATAAAATAAAATAAAATAAAATAAAATAAAATAA/AATAAAATAAAATAAAATAAAATAAAATAAAATAAAATAA	AATAAAATAAAATAAAATAAAATAAAATAAAATAA/AATAAAATAAAATAAAATAAAATAAAATAAAATAA	AATAAAATAAAATAAAATAAAATAAAATAAAATAAAATAA/AATAAAATAAAATAAAATAAAATAAAATAAAATAAAATAA	AATAAAATAAAATAAAATAAAATAA/AATAAAATAAAATAAAATAAAATAA	AATAAAATAAAATAAAATAAAATAA/AATAAAATAAAATAAAATAAAATAA	AATAAAATAAAATAAAATAAAATAA/AATAAAATAAAATAAAATAAAATAA	AATAAAATAAAATAAAATAAAATAAAATAAAATAA/AATAAAATAAAATAAAATAAAATAAAATAAAATAA	AATAAAATAAAATAAAATAAAATAAAATAAAATAA/AATAAAATAAAATAAAATAAAATAAAATAAAATAA	AATAAAATAAAATAAAATAAAATAAAATAAAATAA/AATAAAATAAAATAAAATAAAATAAAATAAAATAA	AATAAAATAAAATAAAATAAAATAAAATAAAATAA/AATAAAATAAAATAAAATAAAATAAAATAAAATAA	AATAAAATAAAATAAAATAAAATAAAATAAAATAA/AATAAAATAAAATAAAATAAAATAAAATAAAATAA	AATAAAATAAAATAAAATAAAATAAAATAAAATAA/AATAAAATAAAATAAAATAAAATAAAATAAAATAA	AATAAAATAAAATAAAATAAAATAAAATAAAATAA/AATAAAATAAAATAAAATAAAATAAAATAAAATAA	AATAAAATAAAATAAAATAAAATAAAATAAAATAAAATAA/AATAAAATAAAATAAAATAAAATAAAATAAAATAAAATAA	AATAAAATAAAATAAAATAAAATAAAATAAAATAA/AATAAAATAAAATAAAATAAAATAAAATAAAATAA	AATAAAATAAAATAAAATAAAATAAAATAA/AATAAAATAAAATAAAATAAAATAAAATAA	AATAAAATAAAATAAAATAAAATAAAATAAAATAA/AATAAAATAAAATAAAATAAAATAAAATAAAATAA	AATAAAATAAAATAAAATAAAATAAAATAAAATAA/AATAAAATAAAATAAAATAAAATAAAATAAAATAA	AATAAAATAAAATAAAATAAAATAAAATAAAATAA/AATAAAATAAAATAAAATAAAATAAAATAAAATAA	AATAAAATAAAATAAAATAAAATAA/AATAAAATAAAATAAAATAAAATAA	AATAAAATAAAATAAAATAAAATAAAATAAAATAA/AATAAAATAAAATAAAATAAAATAAAATAAAATAA	AATAAAATAAAATAAAATAAAATAAAATAAAATAA/AATAAAATAAAATAAAATAAAATAAAATAAAATAA	AATAAAATAAAATAAAATAAAATAAAATAAAATAA/AATAAAATAAAATAAAATAAAATAAAATAAAATAA	AATAAAATAAAATAAAATAAAATAAAATAAAATAAAATAA/AATAAAATAAAATAAAATAAAATAAAATAAAATAAAATAA
Xunr129	7	5035624	GTGAAGGGCGTGAGGCCTTCGCAGTAGTGTTAGCGTCTGC	60.904	AGGCAGTCTGGCGTCCCTGTCTGCACCTCATCTCACACTG	60.818	ACACACACACACACACACACACACACACACACACAC	ACACACACACACACACACACACACACACACACACAC;ACACACACACAC;ACACACACACACAC;ACACACACACACACAC;ACACACACACACACACAC;ACACACACACACACACACAC;ACACACACACACACACACACA;ACACACACACACACACACACAC;ACACACACACACACACACACACAC;ACACACACACACACACACACACACAC;ACACACACACACACACACACACACACAC;ACACACACACACACACACACACACACACAC;ACACACACACACACACACACACACACACACAC;ACACACACACACACACACACACACACACACACAC;ACACACACACACACACACACACACACACACACACACAC;ACACACACACACA…	ACACACACACACACACAC/ACACACACACACACACACAC	ACACACACACACACACACACAC/ACACACACACACACACACACACACACACACACAC	ACACACACACACACACACACACACAC/ACACACACACACACACACACACACACACACACAC	./.	ACACACACACACACACACACACACACAC/ACACACACACACACACACACACACACACAC	ACACACACACACACACACACAC/ACACACACACACACACACACACAC	ACACACACACACACACACAC/ACACACACACACACACACACAC	./.	ACACACACACACACACACACACACACAC/ACACACACACACACACACACACACACACACACAC	./.	ACACACACACACAC/ACACACACACACACACACACACACACACAC	ACACACACACAC/ACACACACACACAC	ACACACACACACACACACAC/ACACACACACACACACACACAC	ACACACACACACAC/ACACACACACACACACACACACACACAC	ACACACACACACAC/ACACACACACACACACACACACACACACAC	ACACACACACAC/ACACACACACACACACACACACACACAC	ACACACACACACACACACACACAC/ACACACACACACACACACACACACACACACACAC	ACACACACACACACACAC/ACACACACACACACACACAC	ACACACACACACACACACAC/ACACACACACACACACACACACAC	ACACACACACACAC/ACACACACACACAC	ACACACACACACACACACAC/ACACACACACACACACACACACAC	ACACACACACACAC/ACACACACACACAC	ACACACACACACACACACAC/ACACACACACACACACACACAC	ACACACACACACACACACACACACACACACACACAC/ACACACACACACACACACACACACACACACACACAC	ACACACACACACACACACACACACACACACACAC/ACACACACACACACACACACACACACACACACACAC	ACACACACACACAC/ACACACACACACACACACACACACACACACACACAC	ACACACACACACAC/ACACACACACACAC	ACACACACACACAC/ACACACACACACAC	ACACACACACACACACACAC/ACACACACACACACACACACACACACACAC	ACACACACACACACACACACACAC/ACACACACACACACACACACACACACACACACAC	ACACACACACACACACACACAC/ACACACACACACACACACACACAC	./.	ACACACACACACACACACACACACAC/ACACACACACACACACACACACACACACAC	ACACACACACACACACACAC/ACACACACACACACACACACACACACAC	ACACACACACACACACACAC/ACACACACACACACACACACACACACAC	ACACACACACACACACACACAC/ACACACACACACACACACACACACACACACACAC	ACACACACACACACACAC/ACACACACACACACACACAC	ACACACACACACACACACAC/ACACACACACACACACACACACACAC	ACACACACACACAC/ACACACACACACAC	ACACACACACACACAC/ACACACACACACACACACACACAC	ACACACACACACACACACAC/ACACACACACACACACACACAC
Xunr130	7	5641132	AAAATCTCCAAACGAGAGAGTTTTGCCCAAGACCTGATTG	53.939	TAACCCAACTTCAGGGAAAAGAATATGTGATCATGGGAAC	51.962	TATATATATATATATATATATATATATATATATATA	TATATATATA;TATATATATATA;TATATATATATATA;TATATATATATATATA;TATATATATATATATATA;TATATATATATATATATATA;TATATATATATATATATATATA;TATATATATATATATATATATATA	./.	TATATATATATATATATA/TATATATATATATATATATA	TATATATATATATATATA/TATATATATATATATATA	TATATATATATATATATA/TATATATATATATATATATA	TATATATATATATATATA/TATATATATATATATATA	TATATATATATATATATA/TATATATATATATATATATA	TATATATATATATATA/TATATATATATATATATA	./.	./.	./.	./.	./.	./.	TATATATATATATATATA/TATATATATATATATATATA	./.	TATATATATATATATATA/TATATATATATATATATA	TATATATATATATATATATATA/TATATATATATATATATATATA	TATATATATATATATATA/TATATATATATATATATA	./.	TATATATATATATATA/TATATATATATATATATA	TATATATATATATATA/TATATATATATATATATA	./.	TATATATATATATATA/TATATATATATATATATA	TATATATATATATATA/TATATATATATATATA	./.	TATATATATATATATATATA/TATATATATATATATATATA	./.	./.	TATATATATATATATA/TATATATATATATATATA	./.	TATATATATATATATA/TATATATATATATATATA	./.	./.	TATATATATATATATATA/TATATATATATATATATA	./.	./.	./.	./.	./.	TATATATATATATATA/TATATATATATATATATA	TATATATATATATATA/TATATATATATATATATA
Xunr131	7	14038852	ATATGCCATACAGAACTACCATAAATTTGGAGGGAAAAAG	49.778	TATTTTTATTACTACTATTTTTTTAGACTTACACTTCTAG	42.311	TATTTATTTATTTATTTATTTATTTATTTATTTAT	TATTTATTTATTTAT;TATTTATTTATTTATTTAT;TATTTATTTATTTATTTATTTAT;TATTTATTTATTTATTTATTTATTTAT;TATTTATTTATTTATTTATTTATTTATTTAT;TATTTATTTATTTATTTATTTATTTATTTATTTATTTAT	TATTTATTTATTTATTTATTTATTTAT/TATTTATTTATTTATTTATTTATTTAT	TATTTATTTATTTATTTATTTATTTAT/TATTTATTTATTTATTTATTTATTTATTTATTTAT	TATTTATTTATTTATTTATTTAT/TATTTATTTATTTATTTATTTAT	TATTTATTTATTTATTTATTTAT/TATTTATTTATTTATTTATTTAT	TATTTATTTATTTATTTATTTAT/TATTTATTTATTTATTTATTTAT	TATTTATTTATTTATTTATTTATTTATTTAT/TATTTATTTATTTATTTATTTATTTATTTAT	TATTTATTTATTTATTTATTTAT/TATTTATTTATTTATTTATTTAT	TATTTATTTATTTATTTATTTAT/TATTTATTTATTTATTTATTTATTTAT	TATTTATTTATTTATTTATTTAT/TATTTATTTATTTATTTATTTAT	./.	TATTTATTTATTTATTTATTTAT/TATTTATTTATTTATTTATTTAT	TATTTATTTATTTATTTATTTAT/TATTTATTTATTTATTTATTTAT	TATTTATTTATTTATTTATTTATTTAT/TATTTATTTATTTATTTATTTATTTAT	TATTTATTTATTTATTTATTTAT/TATTTATTTATTTATTTATTTATTTATTTATTTATTTAT	TATTTATTTATTTATTTATTTATTTATTTAT/TATTTATTTATTTATTTATTTATTTATTTAT	TATTTATTTATTTATTTATTTAT/TATTTATTTATTTATTTATTTAT	TATTTATTTATTTATTTATTTAT/TATTTATTTATTTATTTATTTATTTATTTATTTATTTAT	TATTTATTTATTTATTTATTTAT/TATTTATTTATTTATTTATTTAT	TATTTATTTATTTATTTATTTATTTATTTAT/TATTTATTTATTTATTTATTTATTTATTTAT	TATTTATTTATTTATTTATTTATTTATTTATTTAT/TATTTATTTATTTATTTATTTATTTATTTATTTAT	TATTTATTTATTTATTTATTTATTTATTTATTTAT/TATTTATTTATTTATTTATTTATTTATTTATTTAT	TATTTATTTATTTATTTATTTATTTATTTATTTAT/TATTTATTTATTTATTTATTTATTTATTTATTTAT	TATTTATTTATTTATTTATTTATTTATTTAT/TATTTATTTATTTATTTATTTATTTATTTAT	TATTTATTTATTTATTTAT/TATTTATTTATTTATTTAT	TATTTATTTATTTATTTATTTATTTATTTATTTAT/TATTTATTTATTTATTTATTTATTTATTTATTTAT	TATTTATTTATTTATTTATTTAT/TATTTATTTATTTATTTATTTAT	./.	TATTTATTTATTTATTTATTTAT/TATTTATTTATTTATTTATTTAT	TATTTATTTATTTATTTATTTAT/TATTTATTTATTTATTTATTTAT	TATTTATTTATTTATTTATTTAT/TATTTATTTATTTATTTATTTAT	TATTTATTTATTTATTTATTTAT/TATTTATTTATTTATTTATTTATTTATTTAT	TATTTATTTATTTATTTATTTATTTAT/TATTTATTTATTTATTTATTTATTTAT	TATTTATTTATTTATTTATTTATTTATTTAT/TATTTATTTATTTATTTATTTATTTATTTAT	TATTTATTTATTTATTTATTTAT/TATTTATTTATTTATTTATTTAT	TATTTATTTATTTATTTATTTAT/TATTTATTTATTTATTTATTTAT	TATTTATTTATTTATTTATTTAT/TATTTATTTATTTATTTATTTAT	TATTTATTTATTTATTTATTTAT/TATTTATTTATTTATTTATTTAT	TATTTATTTATTTATTTATTTAT/TATTTATTTATTTATTTATTTAT	TATTTATTTATTTATTTATTTAT/TATTTATTTATTTATTTATTTAT	TATTTATTTATTTATTTAT/TATTTATTTATTTATTTAT	TATTTATTTATTTATTTATTTATTTATTTATTTAT/TATTTATTTATTTATTTATTTATTTATTTATTTAT
Xunr132	7	54530065	AACAAACAATTTGGTTTCTCTTATGAGAAAAAACAATGGC	49.595	GCTGCCAGGAAGGCGCCTAAAATTGCCCCCGTATCAAATC	59.205	ACAGACAGACAGACAGACAGACAGACAGACAGCAGA	ACAGACAGACAGACAG;ACAGACAGACAGACAGAC;ACAGACAGACAGACAGACAG;ACAGACAGACAGACAGACAGACAG;ACAGACAGACAGACAGACAGACAGACAG;ACAGACAGACAGACAGACAGACAGACAGACAG;ACAGACAGACAGACAGACAGACAGACAGACAGCAGAACAG;ACAGACAGACAGACAGACAGACAGACAGACAGCAGAACAGACAG;ACAGACAGACAGACAGACAGACAGACAGACAGCAGAACAGACAGACAG	ACAGACAGACAGACAGACAGACAGACAGACAGCAGA/ACAGACAGACAGACAGACAGACAGACAGACAGCAGA	ACAGACAGACAGACAGACAGACAGACAGACAG/ACAGACAGACAGACAGACAGACAGACAGACAGCAGA	ACAGACAGACAGACAGACAG/ACAGACAGACAGACAGACAGACAGACAGACAGCAGA	ACAGACAGACAGACAGACAGACAGACAGACAGCAGA/ACAGACAGACAGACAGACAGACAGACAGACAGCAGA	ACAGACAGACAGACAG/ACAGACAGACAGACAGACAGACAGACAG	ACAGACAGACAGACAGACAGACAGACAGACAGCAGAACAG/ACAGACAGACAGACAGACAGACAGACAGACAGCAGAACAG	ACAGACAGACAGACAGACAGACAGACAGACAGCAGA/ACAGACAGACAGACAGACAGACAGACAGACAGCAGA	ACAGACAGACAGACAGACAGACAGACAG/ACAGACAGACAGACAGACAGACAGACAG	ACAGACAGACAGACAGACAG/ACAGACAGACAGACAGACAG	ACAGACAGACAGACAGACAGACAGACAGACAG/ACAGACAGACAGACAGACAGACAGACAGACAG	ACAGACAGACAGACAG/ACAGACAGACAGACAGACAGACAGACAGACAGCAGA	ACAGACAGACAGACAG/ACAGACAGACAGACAGACAGACAGACAGACAG	ACAGACAGACAGACAGACAGACAGACAGACAG/ACAGACAGACAGACAGACAGACAGACAGACAG	ACAGACAGACAGACAGACAGACAGACAGACAG/ACAGACAGACAGACAGACAGACAGACAGACAGCAGAACAG	ACAGACAGACAGACAG/ACAGACAGACAGACAGACAGACAG	ACAGACAGACAGACAGACAG/ACAGACAGACAGACAGACAGACAGACAGACAGCAGAACAGACAGACAG	ACAGACAGACAGACAGACAG/ACAGACAGACAGACAGACAGACAGACAGACAGCAGA	ACAGACAGACAGACAGACAGACAGACAGACAGCAGA/ACAGACAGACAGACAGACAGACAGACAGACAGCAGAACAG	ACAGACAGACAGACAGACAGACAGACAGACAGCAGA/ACAGACAGACAGACAGACAGACAGACAGACAGCAGAACAG	ACAGACAGACAGACAGACAGACAGACAGACAGCAGA/ACAGACAGACAGACAGACAGACAGACAGACAGCAGAACAG	ACAGACAGACAGACAGACAGACAGACAGACAG/ACAGACAGACAGACAGACAGACAGACAGACAG	ACAGACAGACAGACAGACAGACAGACAGACAG/ACAGACAGACAGACAGACAGACAGACAGACAGCAGAACAG	ACAGACAGACAGACAGACAGACAGACAGACAGCAGA/ACAGACAGACAGACAGACAGACAGACAGACAGCAGA	ACAGACAGACAGACAGACAGACAGACAGACAG/ACAGACAGACAGACAGACAGACAGACAGACAG	ACAGACAGACAGACAGACAGACAGACAGACAG/ACAGACAGACAGACAGACAGACAGACAGACAGCAGA	ACAGACAGACAGACAG/ACAGACAGACAGACAGACAGACAGACAG	ACAGACAGACAGACAGACAG/ACAGACAGACAGACAGACAG	ACAGACAGACAGACAGACAG/ACAGACAGACAGACAGACAG	ACAGACAGACAGACAGACAG/ACAGACAGACAGACAGACAGACAGACAGACAGCAGA	ACAGACAGACAGACAGACAG/ACAGACAGACAGACAGACAG	ACAGACAGACAGACAG/ACAGACAGACAGACAGACAGACAGACAGACAGCAGAACAG	./.	ACAGACAGACAGACAGACAGACAGACAGACAGCAGA/ACAGACAGACAGACAGACAGACAGACAGACAGCAGA	ACAGACAGACAGACAGACAG/ACAGACAGACAGACAGACAG	ACAGACAGACAGACAGACAG/ACAGACAGACAGACAGACAG	ACAGACAGACAGACAGACAGACAGACAGACAG/ACAGACAGACAGACAGACAGACAGACAGACAGCAGA	ACAGACAGACAGACAGACAGACAGACAGACAGCAGA/ACAGACAGACAGACAGACAGACAGACAGACAGCAGA	ACAGACAGACAGACAGACAGACAGACAGACAGCAGA/ACAGACAGACAGACAGACAGACAGACAGACAGCAGA	ACAGACAGACAGACAGACAG/ACAGACAGACAGACAGACAG	ACAGACAGACAGACAGACAGACAGACAG/ACAGACAGACAGACAGACAGACAGACAGACAG	ACAGACAGACAGACAGACAGACAGACAGACAGCAGA/ACAGACAGACAGACAGACAGACAGACAGACAGCAGA
Xunr133	7	56963910	CGGCCATCGCGACGGCGAGCGCGCGGCGCGACCTCGGTGG	71.765	CCACGGCACCGCCGGCCCCGGCCTCCCCGGCCGCCAAGAG	72.14	AGGAGGAGGAGGAGGAGG	AGGAGGAGGAGGAGG;AGGAGGAGGAGGAGGAGGAGGAGGAGG;AGGAGGAGGAGGAGGAGGAGGAGGAGGAGG;AGGAGGAGGAGGAGGAGGAGGAGGAGGAGGAG;AGGAGGAGGAGGAGGAGGAGGAGGAGGAGGAGG;AGGAGGAGGAGGAGGAGGAGGAGGAGGAGGAGGAG;AGGAGGAGGAGGAGGAGGAGGAGGAGGAGGAGGAGG;AGGAGGAGGAGGAGGAGGAGGAGGAGGAGGAGGAGGAGG;AGGAGGAGGAGGAGGAGGAGGAGGAGGAGGAGGAGGAGGAGG;AGGAGGAGGAGGAGGAGGAGGAGGAGGAGGAGGAGGAGGAGGAGG;AGGAGGAGGAGGAGGAGGAGGAGGAGGAGGAGGAGGAGGAGGAGGAGG	AGGAGGAGGAGGAGGAGGAGGAGGAGGAGGAGGAG/AGGAGGAGGAGGAGGAGGAGGAGGAGGAGGAGGAGG	AGGAGGAGGAGGAGGAGGAGGAGGAGGAGGAGGAGG/AGGAGGAGGAGGAGGAGGAGGAGGAGGAGGAGGAGG	./.	AGGAGGAGGAGGAGGAGG/AGGAGGAGGAGGAGGAGG	AGGAGGAGGAGGAGGAGG/AGGAGGAGGAGGAGGAGG	AGGAGGAGGAGGAGGAGG/AGGAGGAGGAGGAGGAGG	AGGAGGAGGAGGAGGAGG/AGGAGGAGGAGGAGGAGG	./.	./.	AGGAGGAGGAGGAGGAGG/AGGAGGAGGAGGAGGAGG	AGGAGGAGGAGGAGGAGGAGGAGGAGGAGG/AGGAGGAGGAGGAGGAGGAGGAGGAGGAGG	AGGAGGAGGAGGAGGAGGAGGAGGAGG/AGGAGGAGGAGGAGGAGGAGGAGGAGGAGG	AGGAGGAGGAGGAGGAGGAGGAGGAGGAGGAGG/AGGAGGAGGAGGAGGAGGAGGAGGAGGAGGAGG	AGGAGGAGGAGGAGG/AGGAGGAGGAGGAGGAGGAGGAGGAGGAGGAGG	AGGAGGAGGAGGAGGAGGAGGAGGAGG/AGGAGGAGGAGGAGGAGGAGGAGGAGGAGG	AGGAGGAGGAGGAGGAGGAGGAGGAGGAGG/AGGAGGAGGAGGAGGAGGAGGAGGAGGAGG	AGGAGGAGGAGGAGGAGGAGGAGGAGGAGGAGGAGG/AGGAGGAGGAGGAGGAGGAGGAGGAGGAGGAGGAGG	AGGAGGAGGAGGAGGAGG/AGGAGGAGGAGGAGGAGG	AGGAGGAGGAGGAGGAGG/AGGAGGAGGAGGAGGAGG	AGGAGGAGGAGGAGGAGGAGGAGGAGGAGGAGG/AGGAGGAGGAGGAGGAGGAGGAGGAGGAGGAGG	AGGAGGAGGAGGAGGAGG/AGGAGGAGGAGGAGGAGG	AGGAGGAGGAGGAGGAGG/AGGAGGAGGAGGAGGAGG	AGGAGGAGGAGGAGGAGG/AGGAGGAGGAGGAGGAGG	AGGAGGAGGAGGAGGAGGAGGAGGAGGAGG/AGGAGGAGGAGGAGGAGGAGGAGGAGGAGGAGG	AGGAGGAGGAGGAGG/AGGAGGAGGAGGAGGAGG	AGGAGGAGGAGGAGGAGGAGGAGGAGGAGG/AGGAGGAGGAGGAGGAGGAGGAGGAGGAGG	./.	AGGAGGAGGAGGAGGAGG/AGGAGGAGGAGGAGGAGG	AGGAGGAGGAGGAGG/AGGAGGAGGAGGAGGAGG	AGGAGGAGGAGGAGGAGGAGGAGGAGG/AGGAGGAGGAGGAGGAGGAGGAGGAGGAGG	AGGAGGAGGAGGAGGAGG/AGGAGGAGGAGGAGGAGG	./.	AGGAGGAGGAGGAGGAGGAGGAGGAGGAGG/AGGAGGAGGAGGAGGAGGAGGAGGAGGAGG	AGGAGGAGGAGGAGGAGGAGGAGGAGGAGG/AGGAGGAGGAGGAGGAGGAGGAGGAGGAGG	AGGAGGAGGAGGAGGAGG/AGGAGGAGGAGGAGGAGG	AGGAGGAGGAGGAGGAGG/AGGAGGAGGAGGAGGAGG	AGGAGGAGGAGGAGGAGGAGGAGGAGGAGGAGGAGG/AGGAGGAGGAGGAGGAGGAGGAGGAGGAGGAGGAGG	AGGAGGAGGAGGAGGAGG/AGGAGGAGGAGGAGGAGG	AGGAGGAGGAGGAGGAGG/AGGAGGAGGAGGAGGAGG	AGGAGGAGGAGGAGGAGG/AGGAGGAGGAGGAGGAGG	AGGAGGAGGAGGAGG/AGGAGGAGGAGGAGGAGG
Xunr134	7	57747911	ATGCCGGCTTTTGTACGGTGCTCTGCCCGCCCCTTCATAC	61.942	CTTCTCATTGCGGGGGCGAACGGGGTTAGGTTCGCATATC	59.687	GAAAAGAAAAGAAAAAAAAAAGAAAAG	GAAAAGAAAAGAAAAAAAA;GAAAAGAAAAGAAAAAAAAAAGAA;GAAAAGAAAAGAAAAAAAAAAGAAAA;GAAAAGAAAAGAAAAAAAAAAGAAAAGAA;GAAAAGAAAAGAAAAAAAAAAGAAAAGAAAGAAAAGAAA	GAAAAGAAAAGAAAAAAAA/GAAAAGAAAAGAAAAAAAAAAGAAAAG	GAAAAGAAAAGAAAAAAAAAAGAAAAGAA/GAAAAGAAAAGAAAAAAAAAAGAAAAGAA	GAAAAGAAAAGAAAAAAAAAAGAAAAGAA/GAAAAGAAAAGAAAAAAAAAAGAAAAGAA	GAAAAGAAAAGAAAAAAAAAAGAAAA/GAAAAGAAAAGAAAAAAAAAAGAAAAG	GAAAAGAAAAGAAAAAAAAAAGAAAAGAA/GAAAAGAAAAGAAAAAAAAAAGAAAAGAA	GAAAAGAAAAGAAAAAAAAAAGAAAAGAA/GAAAAGAAAAGAAAAAAAAAAGAAAAGAA	GAAAAGAAAAGAAAAAAAAAAGAAAA/GAAAAGAAAAGAAAAAAAAAAGAAAAG	GAAAAGAAAAGAAAAAAAAAAGAA/GAAAAGAAAAGAAAAAAAAAAGAA	GAAAAGAAAAGAAAAAAAAAAGAAAA/GAAAAGAAAAGAAAAAAAAAAGAAAAG	GAAAAGAAAAGAAAAAAAAAAGAAAAGAA/GAAAAGAAAAGAAAAAAAAAAGAAAAGAA	GAAAAGAAAAGAAAAAAAAAAGAAAA/GAAAAGAAAAGAAAAAAAAAAGAAAAG	GAAAAGAAAAGAAAAAAAAAAGAAAAGAA/GAAAAGAAAAGAAAAAAAAAAGAAAAGAA	GAAAAGAAAAGAAAAAAAAAAGAAAAGAA/GAAAAGAAAAGAAAAAAAAAAGAAAAGAA	GAAAAGAAAAGAAAAAAAAAAGAAAA/GAAAAGAAAAGAAAAAAAAAAGAAAAG	GAAAAGAAAAGAAAAAAAAAAGAAAA/GAAAAGAAAAGAAAAAAAAAAGAAAAG	GAAAAGAAAAGAAAAAAAAAAGAAAAGAA/GAAAAGAAAAGAAAAAAAAAAGAAAAGAA	GAAAAGAAAAGAAAAAAAAAAGAAAAGAA/GAAAAGAAAAGAAAAAAAAAAGAAAAGAA	GAAAAGAAAAGAAAAAAAAAAGAAAA/GAAAAGAAAAGAAAAAAAAAAGAAAAG	GAAAAGAAAAGAAAAAAAAAAGAAAA/GAAAAGAAAAGAAAAAAAAAAGAAAAG	GAAAAGAAAAGAAAAAAAAAAGAAAAGAA/GAAAAGAAAAGAAAAAAAAAAGAAAAGAA	GAAAAGAAAAGAAAAAAAAAAGAAAA/GAAAAGAAAAGAAAAAAAAAAGAAAAG	GAAAAGAAAAGAAAAAAAAAAGAAAA/GAAAAGAAAAGAAAAAAAAAAGAAAAG	GAAAAGAAAAGAAAAAAAAAAGAA/GAAAAGAAAAGAAAAAAAAAAGAA	GAAAAGAAAAGAAAAAAAAAAGAA/GAAAAGAAAAGAAAAAAAAAAGAA	GAAAAGAAAAGAAAAAAAAAAGAAAA/GAAAAGAAAAGAAAAAAAAAAGAAAAG	GAAAAGAAAAGAAAAAAAAAAGAAAAGAA/GAAAAGAAAAGAAAAAAAAAAGAAAAGAA	GAAAAGAAAAGAAAAAAAAAAGAAAAGAA/GAAAAGAAAAGAAAAAAAAAAGAAAAGAA	GAAAAGAAAAGAAAAAAAAAAGAAAAGAA/GAAAAGAAAAGAAAAAAAAAAGAAAAGAA	GAAAAGAAAAGAAAAAAAAAAGAAAA/GAAAAGAAAAGAAAAAAAAAAGAAAAG	GAAAAGAAAAGAAAAAAAAAAGAAAAGAA/GAAAAGAAAAGAAAAAAAAAAGAAAAGAA	GAAAAGAAAAGAAAAAAAAAAGAAAAGAA/GAAAAGAAAAGAAAAAAAAAAGAAAAGAA	GAAAAGAAAAGAAAAAAAAAAGAAAAGAAAGAAAAGAAA/GAAAAGAAAAGAAAAAAAAAAGAAAAGAAAGAAAAGAAA	GAAAAGAAAAGAAAAAAAAAAGAAAAGAA/GAAAAGAAAAGAAAAAAAAAAGAAAAGAA	GAAAAGAAAAGAAAAAAAAAAGAAAAGAA/GAAAAGAAAAGAAAAAAAAAAGAAAAGAA	GAAAAGAAAAGAAAAAAAAAAGAAAAGAA/GAAAAGAAAAGAAAAAAAAAAGAAAAGAA	GAAAAGAAAAGAAAAAAAAAAGAAAAGAA/GAAAAGAAAAGAAAAAAAAAAGAAAAGAA	GAAAAGAAAAGAAAAAAAA/GAAAAGAAAAGAAAAAAAA	GAAAAGAAAAGAAAAAAAAAAGAAAA/GAAAAGAAAAGAAAAAAAAAAGAAAAG	GAAAAGAAAAGAAAAAAAAAAGAAAAGAA/GAAAAGAAAAGAAAAAAAAAAGAAAAGAA	GAAAAGAAAAGAAAAAAAAAAGAAAA/GAAAAGAAAAGAAAAAAAAAAGAAAAG	GAAAAGAAAAGAAAAAAAAAAGAAAA/GAAAAGAAAAGAAAAAAAAAAGAAAAG
Xunr135	7	62271586	AATCGCCCATAACCTAGTGGGCCCCCACCACGAAGCCTTG	61.172	GGGCGGCAGCGGCGGTGGGGGCTGTCGGAAAATATCTTGG	64.617	CCACTCCCACTCCCACTCCCACTCCC	CCACTCCCACTCC;CCACTCCCACTCCC;CCACTCCCACTCCCA;CCACTCCCACTCCCAC;CCACTCCCACTCCCACTCCC;CCACTCCCACTCCCACTCCCACTCC;CCACTCCCACTCCCACTCCCACTCCCACTCCC	CCACTCCCACTCCC/CCACTCCCACTCCC	CCACTCCCACTCCCACTCCCACTCCC/CCACTCCCACTCCCACTCCCACTCCC	CCACTCCCACTCCCACTCCCACTCCC/CCACTCCCACTCCCACTCCCACTCCC	./.	CCACTCCCACTCCCACTCCCACTCCC/CCACTCCCACTCCCACTCCCACTCCC	CCACTCCCACTCCCACTCCCACTCCC/CCACTCCCACTCCCACTCCCACTCCC	./.	./.	CCACTCCCACTCCCACTCCCACTCCC/CCACTCCCACTCCCACTCCCACTCCC	CCACTCCCACTCCCACTCCCACTCCC/CCACTCCCACTCCCACTCCCACTCCC	CCACTCCCACTCCCACTCCCACTCCC/CCACTCCCACTCCCACTCCCACTCCC	CCACTCCCACTCCCACTCCCACTCCC/CCACTCCCACTCCCACTCCCACTCCC	CCACTCCCACTCCCACTCCCACTCCC/CCACTCCCACTCCCACTCCCACTCCC	CCACTCCCACTCCCACTCCCACTCCC/CCACTCCCACTCCCACTCCCACTCCC	CCACTCCCACTCCCACTCCCACTCCC/CCACTCCCACTCCCACTCCCACTCCC	CCACTCCCACTCCCACTCCCACTCCC/CCACTCCCACTCCCACTCCCACTCCC	CCACTCCCACTCCCACTCCCACTCCC/CCACTCCCACTCCCACTCCCACTCCCACTCCC	CCACTCCCACTCCCACTCCCACTCCC/CCACTCCCACTCCCACTCCCACTCCC	./.	CCACTCCCACTCCCACTCCCACTCCC/CCACTCCCACTCCCACTCCCACTCCC	CCACTCCCACTCCCACTCCCACTCCC/CCACTCCCACTCCCACTCCCACTCCC	CCACTCCCACTCCCACTCCCACTCCC/CCACTCCCACTCCCACTCCCACTCCC	CCACTCCCACTCCCACTCCCACTCCC/CCACTCCCACTCCCACTCCCACTCCC	CCACTCCCACTCCCACTCCCACTCCC/CCACTCCCACTCCCACTCCCACTCCC	CCACTCCCACTCCCACTCCCACTCCC/CCACTCCCACTCCCACTCCCACTCCC	CCACTCCCACTCCCACTCCCACTCCC/CCACTCCCACTCCCACTCCCACTCCC	CCACTCCCACTCCCACTCCCACTCCC/CCACTCCCACTCCCACTCCCACTCCC	CCACTCCCACTCCCACTCCCACTCCC/CCACTCCCACTCCCACTCCCACTCCC	CCACTCCCACTCCCACTCCCACTCCC/CCACTCCCACTCCCACTCCCACTCCC	CCACTCCCACTCCCACTCCCACTCCC/CCACTCCCACTCCCACTCCCACTCCC	./.	./.	CCACTCCCACTCCCACTCCCACTCCC/CCACTCCCACTCCCACTCCCACTCCC	CCACTCCCACTCCCACTCCCACTCCC/CCACTCCCACTCCCACTCCCACTCCC	CCACTCCCACTCCCACTCCCACTCCC/CCACTCCCACTCCCACTCCCACTCCC	CCACTCCCACTCCCACTCCCACTCCC/CCACTCCCACTCCCACTCCCACTCCC	CCACTCCCACTCCCACTCCC/CCACTCCCACTCCCACTCCC	CCACTCCCACTCCCACTCCCACTCCC/CCACTCCCACTCCCACTCCCACTCCC	./.	CCACTCCCACTCCCACTCCCACTCCC/CCACTCCCACTCCCACTCCCACTCCC	CCACTCCCACTCCCACTCCCACTCCC/CCACTCCCACTCCCACTCCCACTCCC
Xunr136	7	63603463	GGCTCGCTCTTTGAGGGCATGGTCCTCTTCGCGCCAGAAC	62.093	CCGCGTCGGCGTCGGGGAGAGCGGCGGGTGGCAGCTCAGG	69.713	CCCGCCCCCGCCCCCGCCCC	CCCGCCCCCGCCC;CCCGCCCCCGCCCC;CCCGCCCCCGCCCCCGCCC;CCCGCCCCCGCCCCCGCCCCCGCCCC;CCCGCCCCCGCCCCCGCCCCCGCCCCCGCCCC;CCCGCCCCCGCCCCCGCCCCCGCCCCCGCCCCCGCCCC	CCCGCCCCCGCCCC/CCCGCCCCCGCCCC	CCCGCCCCCGCCCCCGCCCC/CCCGCCCCCGCCCCCGCCCCCGCCCC	CCCGCCCCCGCCCC/CCCGCCCCCGCCCC	CCCGCCCCCGCCCCCGCCCC/CCCGCCCCCGCCCCCGCCCC	CCCGCCCCCGCCCC/CCCGCCCCCGCCCC	CCCGCCCCCGCCCC/CCCGCCCCCGCCCC	CCCGCCCCCGCCCCCGCCCC/CCCGCCCCCGCCCCCGCCCC	./.	CCCGCCCCCGCCCC/CCCGCCCCCGCCCC	CCCGCCCCCGCCCC/CCCGCCCCCGCCCC	CCCGCCCCCGCCCC/CCCGCCCCCGCCCC	CCCGCCCCCGCCCC/CCCGCCCCCGCCCC	./.	CCCGCCCCCGCCCCCGCCCC/CCCGCCCCCGCCCCCGCCCC	CCCGCCCCCGCCCC/CCCGCCCCCGCCCC	CCCGCCCCCGCCCC/CCCGCCCCCGCCCC	CCCGCCCCCGCCCC/CCCGCCCCCGCCCC	CCCGCCCCCGCCCCCGCCCC/CCCGCCCCCGCCCCCGCCCC	CCCGCCCCCGCCCC/CCCGCCCCCGCCCC	./.	CCCGCCCCCGCCCCCGCCCC/CCCGCCCCCGCCCCCGCCCC	CCCGCCCCCGCCCCCGCCCC/CCCGCCCCCGCCCCCGCCCC	CCCGCCCCCGCCCCCGCCCC/CCCGCCCCCGCCCCCGCCCC	CCCGCCCCCGCCCC/CCCGCCCCCGCCCC	CCCGCCCCCGCCCCCGCCCC/CCCGCCCCCGCCCCCGCCCC	CCCGCCCCCGCCCC/CCCGCCCCCGCCCC	CCCGCCCCCGCCCC/CCCGCCCCCGCCCC	CCCGCCCCCGCCCC/CCCGCCCCCGCCCC	CCCGCCCCCGCCCC/CCCGCCCCCGCCCC	CCCGCCCCCGCCCC/CCCGCCCCCGCCCC	CCCGCCCCCGCCCC/CCCGCCCCCGCCCC	./.	CCCGCCCCCGCCCC/CCCGCCCCCGCCCC	CCCGCCCCCGCCCCCGCCCC/CCCGCCCCCGCCCCCGCCCC	CCCGCCCCCGCCCC/CCCGCCCCCGCCCC	CCCGCCCCCGCCCC/CCCGCCCCCGCCCC	CCCGCCCCCGCCCCCGCCCCCGCCCC/CCCGCCCCCGCCCCCGCCCCCGCCCC	CCCGCCCCCGCCCC/CCCGCCCCCGCCCC	CCCGCCCCCGCCCCCGCCCC/CCCGCCCCCGCCCCCGCCCC	CCCGCCCCCGCCCC/CCCGCCCCCGCCCC	CCCGCCCCCGCCCCCGCCCC/CCCGCCCCCGCCCCCGCCCC
Xgma4	8	1256427	GCCCAGCAGACCAGCCGCGTTGGCTGGCGGGACGGAGCAG	67.996	CAGTAGACCGTCGGGACGGCGCCGCTGGGCCTCGGCTTGG	67.307	CCACGCCCACGCCCACG	CCACGCCCAC;CCACGCCCACG;CCACGCCCACGCCCACGCCCACG;CCACGCCCACGCCCACGCCCACGCCCACG;CCACGCCCACGCCCACGCCCACGCCCACGCCCAC;CCACGCCCACGCCCACGCCCACGCCCACGCCCACG;CCACGCCCACGCCCACGCCCACGCCCACGCCCACGCCCACG;CCACGCCCACGCCCACGCCCACGCCCACGCCCACGCCCACGCCCACG;CCACGCCCACGCCCACGCCCACGCCCACGCCCACGCCCACGCCCACGCCCACG;CCACGCCCACGCCCACGCCCACGCCCACGCCCACGCCCACGCCCACGCCCACGCCCACG	CCACGCCCACGCCCACGCCCACGCCCACG/CCACGCCCACGCCCACGCCCACGCCCACG	CCACGCCCACGCCCACGCCCACGCCCACG/CCACGCCCACGCCCACGCCCACGCCCACG	CCACGCCCACGCCCACGCCCACGCCCACGCCCACG/CCACGCCCACGCCCACGCCCACGCCCACGCCCACG	CCACGCCCACGCCCACGCCCACGCCCACGCCCACG/CCACGCCCACGCCCACGCCCACGCCCACGCCCACG	CCACGCCCACGCCCACGCCCACGCCCACG/CCACGCCCACGCCCACGCCCACGCCCACGCCCACG	CCACGCCCACGCCCACGCCCACGCCCACGCCCACG/CCACGCCCACGCCCACGCCCACGCCCACGCCCACG	CCACGCCCACGCCCACGCCCACGCCCACGCCCACG/CCACGCCCACGCCCACGCCCACGCCCACGCCCACG	CCACGCCCACG/CCACGCCCACG	./.	CCACGCCCACGCCCACGCCCACGCCCACG/CCACGCCCACGCCCACGCCCACGCCCACGCCCACG	CCACGCCCACGCCCACGCCCACGCCCACGCCCACG/CCACGCCCACGCCCACGCCCACGCCCACGCCCACG	CCACGCCCACGCCCACGCCCACGCCCACGCCCACG/CCACGCCCACGCCCACGCCCACGCCCACGCCCACG	./.	CCACGCCCACGCCCACG/CCACGCCCACGCCCACG	CCACGCCCACGCCCACGCCCACGCCCACGCCCACG/CCACGCCCACGCCCACGCCCACGCCCACGCCCACG	CCACGCCCACGCCCACGCCCACGCCCACGCCCACG/CCACGCCCACGCCCACGCCCACGCCCACGCCCACG	CCACGCCCACGCCCACGCCCACGCCCACGCCCACG/CCACGCCCACGCCCACGCCCACGCCCACGCCCACG	CCACGCCCACGCCCACG/CCACGCCCACGCCCACGCCCACGCCCACGCCCACG	CCACGCCCACGCCCACGCCCACGCCCACGCCCACG/CCACGCCCACGCCCACGCCCACGCCCACGCCCACG	CCACGCCCACGCCCACG/CCACGCCCACGCCCACG	CCACGCCCACGCCCACGCCCACGCCCACGCCCACG/CCACGCCCACGCCCACGCCCACGCCCACGCCCACG	CCACGCCCACGCCCACGCCCACGCCCACGCCCACG/CCACGCCCACGCCCACGCCCACGCCCACGCCCACG	CCACGCCCACGCCCACGCCCACGCCCACGCCCACG/CCACGCCCACGCCCACGCCCACGCCCACGCCCACG	CCACGCCCACGCCCACGCCCACGCCCACGCCCACG/CCACGCCCACGCCCACGCCCACGCCCACGCCCACG	CCACGCCCACGCCCACG/CCACGCCCACGCCCACG	CCACGCCCACGCCCACGCCCACGCCCACGCCCACG/CCACGCCCACGCCCACGCCCACGCCCACGCCCACG	./.	CCACGCCCACGCCCACGCCCACGCCCACGCCCACG/CCACGCCCACGCCCACGCCCACGCCCACGCCCACG	CCACGCCCACGCCCACGCCCACGCCCACGCCCACG/CCACGCCCACGCCCACGCCCACGCCCACGCCCACG	CCACGCCCACGCCCACGCCCACGCCCACGCCCACG/CCACGCCCACGCCCACGCCCACGCCCACGCCCACG	CCACGCCCACGCCCACGCCCACGCCCACGCCCACG/CCACGCCCACGCCCACGCCCACGCCCACGCCCACG	CCACGCCCACG/CCACGCCCACG	CCACGCCCACGCCCACGCCCACGCCCACGCCCACG/CCACGCCCACGCCCACGCCCACGCCCACGCCCACG	CCACGCCCACGCCCACG/CCACGCCCACGCCCACG	CCACGCCCACGCCCACGCCCACGCCCACGCCCACG/CCACGCCCACGCCCACGCCCACGCCCACGCCCACG	CCACGCCCACGCCCACGCCCACGCCCACGCCCACG/CCACGCCCACGCCCACGCCCACGCCCACGCCCACG	CCACGCCCACGCCCACGCCCACG/CCACGCCCACGCCCACGCCCACG	CCACGCCCACGCCCACGCCCACGCCCACGCCCACG/CCACGCCCACGCCCACGCCCACGCCCACGCCCACG	CCACGCCCACGCCCACGCCCACGCCCACGCCCACG/CCACGCCCACGCCCACGCCCACGCCCACGCCCACG	CCACGCCCACGCCCACG/CCACGCCCACGCCCACG	CCACGCCCACGCCCACGCCCACGCCCACGCCCACG/CCACGCCCACGCCCACGCCCACGCCCACGCCCACG
Xunr137	8	2001561	TAATTTGATCATGAAGAAATGATTGTATGTACTGAACTTG	46.918	TGGCATATATTTCCCAGTTTATGTAGTCGTTTTTGATGAC	50.229	TATATATATATATATATATATATATATATATATATA	TATATATATA;TATATATATATA;TATATATATATATA;TATATATATATATAT;TATATATATATATATA;TATATATATATATATAT;TATATATATATATATATA;TATATATATATATATATATA;TATATATATATATATATATATA	TATATATATATATATA/TATATATATATATATA	TATATATATA/TATATATATA	TATATATATATATATA/TATATATATATATATATA	TATATATATATATA/TATATATATATATATA	./.	TATATATATATATA/TATATATATATATATA	./.	./.	TATATATATATATA/TATATATATATATATA	./.	TATATATATATATATA/TATATATATATATATA	TATATATATATATATA/TATATATATATATATATA	TATATATATATATATA/TATATATATATATATATA	TATATATATATATATA/TATATATATATATATA	TATATATATATATATA/TATATATATATATATA	TATATATATATATATA/TATATATATATATATA	TATATATATATATATA/TATATATATATATATATA	TATATATATATATA/TATATATATATATATA	TATATATATATATATA/TATATATATATATATATA	TATATATATA/TATATATATA	TATATATATATATATA/TATATATATATATATA	./.	TATATATATATATATA/TATATATATATATATA	TATATATATATATATA/TATATATATATATATA	./.	TATATATATATATATA/TATATATATATATATATA	TATATATATATA/TATATATATATATATA	TATATATATATATA/TATATATATATATATA	TATATATATATATA/TATATATATATATATA	TATATATATATATA/TATATATATATATATA	TATATATATATATA/TATATATATATATATA	./.	TATATATATATATA/TATATATATATATATA	./.	TATATATATATATA/TATATATATATATATA	TATATATATATATATA/TATATATATATATATA	TATATATATATATA/TATATATATATATATA	TATATATATATATA/TATATATATATATATA	TATATATATATA/TATATATATATATATA	./.	TATATATATATATA/TATATATATATATATA
Xunr138	8	3049162	CTCCTGCCGCGGGATTTCAGTTACCGCCCGCTGCCGCTTC	64.727	CGCCGCAGCAGGCGCTTCACGGGCGAGCCCAGCGGCATTG	68.946	GGCAGGCAGGCAGGCAGGCAGGCAGGCAGGCAGGC	GGCAGGCAGGCAGGC;GGCAGGCAGGCAGGCAGGC;GGCAGGCAGGCAGGCAGGCAGGCAGGC;GGCAGGCAGGCAGGCAGGCAGGCAGGCAGGC;GGCAGGCAGGCAGGCAGGCAGGCAGGCAGGCAGG;GGCAGGCAGGCAGGCAGGCAGGCAGGCAGGCAGGCAGGC	GGCAGGCAGGCAGGCAGGCAGGCAGGCAGGC/GGCAGGCAGGCAGGCAGGCAGGCAGGCAGGC	GGCAGGCAGGCAGGCAGGCAGGCAGGCAGGC/GGCAGGCAGGCAGGCAGGCAGGCAGGCAGGC	GGCAGGCAGGCAGGCAGGCAGGCAGGC/GGCAGGCAGGCAGGCAGGCAGGCAGGC	GGCAGGCAGGCAGGCAGGCAGGCAGGCAGGCAGGC/GGCAGGCAGGCAGGCAGGCAGGCAGGCAGGCAGGC	GGCAGGCAGGCAGGC/GGCAGGCAGGCAGGC	GGCAGGCAGGCAGGCAGGCAGGCAGGC/GGCAGGCAGGCAGGCAGGCAGGCAGGC	GGCAGGCAGGCAGGCAGGCAGGCAGGCAGGCAGGC/GGCAGGCAGGCAGGCAGGCAGGCAGGCAGGCAGGC	GGCAGGCAGGCAGGCAGGC/GGCAGGCAGGCAGGCAGGCAGGCAGGC	GGCAGGCAGGCAGGCAGGCAGGCAGGC/GGCAGGCAGGCAGGCAGGCAGGCAGGC	GGCAGGCAGGCAGGCAGGCAGGCAGGCAGGCAGGC/GGCAGGCAGGCAGGCAGGCAGGCAGGCAGGCAGGC	GGCAGGCAGGCAGGCAGGCAGGCAGGCAGGCAGGC/GGCAGGCAGGCAGGCAGGCAGGCAGGCAGGCAGGC	GGCAGGCAGGCAGGCAGGCAGGCAGGCAGGCAGGC/GGCAGGCAGGCAGGCAGGCAGGCAGGCAGGCAGGC	GGCAGGCAGGCAGGCAGGCAGGCAGGC/GGCAGGCAGGCAGGCAGGCAGGCAGGC	GGCAGGCAGGCAGGCAGGCAGGCAGGC/GGCAGGCAGGCAGGCAGGCAGGCAGGC	GGCAGGCAGGCAGGCAGGCAGGCAGGCAGGCAGGC/GGCAGGCAGGCAGGCAGGCAGGCAGGCAGGCAGGC	GGCAGGCAGGCAGGCAGGCAGGCAGGCAGGC/GGCAGGCAGGCAGGCAGGCAGGCAGGCAGGC	GGCAGGCAGGCAGGCAGGCAGGCAGGCAGGC/GGCAGGCAGGCAGGCAGGCAGGCAGGCAGGC	GGCAGGCAGGCAGGCAGGCAGGCAGGCAGGC/GGCAGGCAGGCAGGCAGGCAGGCAGGCAGGC	GGCAGGCAGGCAGGCAGGC/GGCAGGCAGGCAGGCAGGC	GGCAGGCAGGCAGGCAGGCAGGCAGGCAGGC/GGCAGGCAGGCAGGCAGGCAGGCAGGCAGGC	GGCAGGCAGGCAGGCAGGCAGGCAGGCAGGC/GGCAGGCAGGCAGGCAGGCAGGCAGGCAGGC	GGCAGGCAGGCAGGCAGGCAGGCAGGCAGGCAGGC/GGCAGGCAGGCAGGCAGGCAGGCAGGCAGGCAGGCAGGC	GGCAGGCAGGCAGGCAGGCAGGCAGGCAGGC/GGCAGGCAGGCAGGCAGGCAGGCAGGCAGGC	GGCAGGCAGGCAGGCAGGCAGGCAGGCAGGCAGGC/GGCAGGCAGGCAGGCAGGCAGGCAGGCAGGCAGGC	GGCAGGCAGGCAGGCAGGCAGGCAGGCAGGCAGGC/GGCAGGCAGGCAGGCAGGCAGGCAGGCAGGCAGGC	GGCAGGCAGGCAGGCAGGCAGGCAGGC/GGCAGGCAGGCAGGCAGGCAGGCAGGC	GGCAGGCAGGCAGGCAGGCAGGCAGGCAGGCAGGC/GGCAGGCAGGCAGGCAGGCAGGCAGGCAGGCAGGC	GGCAGGCAGGCAGGCAGGCAGGCAGGCAGGCAGGC/GGCAGGCAGGCAGGCAGGCAGGCAGGCAGGCAGGC	GGCAGGCAGGCAGGCAGGCAGGCAGGCAGGCAGGC/GGCAGGCAGGCAGGCAGGCAGGCAGGCAGGCAGGC	GGCAGGCAGGCAGGCAGGCAGGCAGGC/GGCAGGCAGGCAGGCAGGCAGGCAGGC	GGCAGGCAGGCAGGCAGGCAGGCAGGCAGGC/GGCAGGCAGGCAGGCAGGCAGGCAGGCAGGC	GGCAGGCAGGCAGGCAGGCAGGCAGGC/GGCAGGCAGGCAGGCAGGCAGGCAGGC	GGCAGGCAGGCAGGCAGGCAGGCAGGC/GGCAGGCAGGCAGGCAGGCAGGCAGGC	GGCAGGCAGGCAGGCAGGCAGGCAGGCAGGCAGGC/GGCAGGCAGGCAGGCAGGCAGGCAGGCAGGCAGGC	GGCAGGCAGGCAGGCAGGCAGGCAGGC/GGCAGGCAGGCAGGCAGGCAGGCAGGCAGGC	GGCAGGCAGGCAGGCAGGCAGGCAGGC/GGCAGGCAGGCAGGCAGGCAGGCAGGC	GGCAGGCAGGCAGGCAGGCAGGCAGGCAGGC/GGCAGGCAGGCAGGCAGGCAGGCAGGCAGGC	GGCAGGCAGGCAGGCAGGCAGGCAGGC/GGCAGGCAGGCAGGCAGGCAGGCAGGC	GGCAGGCAGGCAGGCAGGCAGGCAGGCAGGCAGGC/GGCAGGCAGGCAGGCAGGCAGGCAGGCAGGCAGGC	GGCAGGCAGGCAGGCAGGCAGGCAGGCAGGC/GGCAGGCAGGCAGGCAGGCAGGCAGGCAGGC	GGCAGGCAGGCAGGCAGGCAGGCAGGCAGGC/GGCAGGCAGGCAGGCAGGCAGGCAGGCAGGC
Xunr139	8	3816293	ATGCTTATTATGTGGAGTGGGATTTTGACGCCTCCACAAG	54.793	CATCGGGCTAAGACTAGGCTCAATTTGCTCATGTATAGTC	53.216	GATGATGATGATGATGATGATGA	GATGATGATGA;GATGATGATGATGA;GATGATGATGATGAT;GATGATGATGATGATGA;GATGATGATGATGATGATGA;GATGATGATGATGATGATGATGATGA;GATGATGATGATGATGATGATGATGATGA;GATGATGATGATGATGATGATGATGATGATGA;GATGATGATGATGATGATGATGATGATGATGATGA	GATGATGATGATGATGATGA/GATGATGATGATGATGATGA	GATGATGATGATGATGATGA/GATGATGATGATGATGATGA	GATGATGATGATGATGATGATGA/GATGATGATGATGATGATGATGATGA	GATGATGATGATGATGATGATGATGA/GATGATGATGATGATGATGATGATGA	GATGATGATGA/GATGATGATGA	GATGATGATGATGA/GATGATGATGATGATGA	GATGATGATGATGATGATGATGA/GATGATGATGATGATGATGATGA	GATGATGATGATGATGATGATGATGA/GATGATGATGATGATGATGATGATGA	GATGATGATGA/GATGATGATGA	GATGATGATGA/GATGATGATGA	GATGATGATGATGA/GATGATGATGATGATGATGATGATGATGA	GATGATGATGA/GATGATGATGATGATGATGATGA	GATGATGATGATGATGATGATGATGA/GATGATGATGATGATGATGATGATGA	GATGATGATGATGATGATGATGA/GATGATGATGATGATGATGATGATGATGA	GATGATGATGA/GATGATGATGATGATGATGATGA	GATGATGATGA/GATGATGATGATGATGATGATGA	GATGATGATGATGATGATGA/GATGATGATGATGATGATGA	GATGATGATGATGATGATGA/GATGATGATGATGATGATGA	GATGATGATGATGATGATGATGATGATGATGA/GATGATGATGATGATGATGATGATGATGATGATGA	GATGATGATGATGATGATGA/GATGATGATGATGATGATGA	GATGATGATGATGATGATGA/GATGATGATGATGATGATGATGATGATGATGATGA	GATGATGATGATGATGATGATGA/GATGATGATGATGATGATGATGA	GATGATGATGATGATGATGATGA/GATGATGATGATGATGATGATGA	GATGATGATGATGATGATGATGA/GATGATGATGATGATGATGATGA	GATGATGATGATGATGATGATGA/GATGATGATGATGATGATGATGA	GATGATGATGA/GATGATGATGA	GATGATGATGATGATGA/GATGATGATGATGATGA	GATGATGATGATGATGATGATGA/GATGATGATGATGATGATGATGA	GATGATGATGA/GATGATGATGA	GATGATGATGATGATGATGATGATGA/GATGATGATGATGATGATGATGATGA	GATGATGATGATGATGATGATGA/GATGATGATGATGATGATGATGA	GATGATGATGATGATGATGATGATGATGA/GATGATGATGATGATGATGATGATGATGA	GATGATGATGATGA/GATGATGATGATGA	GATGATGATGATGATGATGATGA/GATGATGATGATGATGATGATGA	GATGATGATGATGATGATGATGATGATGA/GATGATGATGATGATGATGATGATGATGATGA	GATGATGATGATGATGATGA/GATGATGATGATGATGATGA	GATGATGATGATGATGATGA/GATGATGATGATGATGATGA	GATGATGATGATGATGATGATGA/GATGATGATGATGATGATGATGA	GATGATGATGATGATGATGATGA/GATGATGATGATGATGATGATGA	GATGATGATGATGATGATGATGA/GATGATGATGATGATGATGATGA	GATGATGATGATGATGATGA/GATGATGATGATGATGATGATGATGATGATGA
Xunr140	8	4284131	CAGGCTGCTCCCGACCTGCAAACGACGGAGAAAGCAGAAC	61.142	TCTTTTTTGTCCTGCGTGTTCGTGTTTGGCATTCCGATGG	57.279	TCAGCATCATCATCATCATCATCATCAATCATC	TCAGCATCATCA;TCAGCATCATCATCA;TCAGCATCATCATCATCA;TCAGCATCATCATCATCATCATCA;TCAGCATCATCATCATCATCATCATCA;TCAGCATCATCATCATCATCATCATCAATC	TCAGCATCATCATCA/TCAGCATCATCATCA	TCAGCATCATCATCATCATCATCATCAATC/TCAGCATCATCATCATCATCATCATCAATC	TCAGCATCATCATCATCATCATCATCA/TCAGCATCATCATCATCATCATCATCA	TCAGCATCATCATCATCATCATCATCA/TCAGCATCATCATCATCATCATCATCA	TCAGCATCATCATCATCATCATCATCAATCATC/TCAGCATCATCATCATCATCATCATCAATCATC	TCAGCATCATCATCATCATCATCATCAATCATC/TCAGCATCATCATCATCATCATCATCAATCATC	TCAGCATCATCATCATCATCATCA/TCAGCATCATCATCATCATCATCATCA	TCAGCATCATCATCATCATCATCATCA/TCAGCATCATCATCATCATCATCATCA	TCAGCATCATCATCATCATCATCATCA/TCAGCATCATCATCATCATCATCATCA	TCAGCATCATCATCATCATCATCATCAATCATC/TCAGCATCATCATCATCATCATCATCAATCATC	TCAGCATCATCATCATCATCATCATCA/TCAGCATCATCATCATCATCATCATCA	TCAGCATCATCATCATCATCATCATCA/TCAGCATCATCATCATCATCATCATCA	TCAGCATCATCATCATCATCATCATCA/TCAGCATCATCATCATCATCATCATCA	TCAGCATCATCATCATCATCATCATCA/TCAGCATCATCATCATCATCATCATCA	TCAGCATCATCATCATCATCATCATCA/TCAGCATCATCATCATCATCATCATCA	TCAGCATCATCATCATCATCATCATCA/TCAGCATCATCATCATCATCATCATCA	TCAGCATCATCATCATCATCATCATCAATC/TCAGCATCATCATCATCATCATCATCAATC	TCAGCATCATCATCATCATCATCATCAATC/TCAGCATCATCATCATCATCATCATCAATC	TCAGCATCATCATCATCATCATCATCA/TCAGCATCATCATCATCATCATCATCA	TCAGCATCATCATCATCATCATCATCA/TCAGCATCATCATCATCATCATCATCA	TCAGCATCATCATCATCATCATCATCAATC/TCAGCATCATCATCATCATCATCATCAATC	TCAGCATCATCATCATCATCATCATCAATCATC/TCAGCATCATCATCATCATCATCATCAATCATC	TCAGCATCATCATCATCATCATCATCA/TCAGCATCATCATCATCATCATCATCA	TCAGCATCATCATCA/TCAGCATCATCATCATCATCATCATCAATC	TCAGCATCATCATCA/TCAGCATCATCATCATCATCATCATCA	TCAGCATCATCATCATCATCATCATCA/TCAGCATCATCATCATCATCATCATCA	TCAGCATCATCATCATCATCATCATCA/TCAGCATCATCATCATCATCATCATCA	TCAGCATCATCATCATCATCATCATCA/TCAGCATCATCATCATCATCATCATCA	TCAGCATCATCATCATCATCATCATCA/TCAGCATCATCATCATCATCATCATCA	TCAGCATCATCATCATCATCATCATCA/TCAGCATCATCATCATCATCATCATCA	TCAGCATCATCATCATCATCATCATCA/TCAGCATCATCATCATCATCATCATCA	TCAGCATCATCATCATCATCATCATCA/TCAGCATCATCATCATCATCATCATCA	TCAGCATCATCATCATCATCATCATCA/TCAGCATCATCATCATCATCATCATCA	TCAGCATCATCATCATCATCATCATCAATCATC/TCAGCATCATCATCATCATCATCATCAATCATC	TCAGCATCATCATCATCATCATCATCA/TCAGCATCATCATCATCATCATCATCA	TCAGCATCATCA/TCAGCATCATCATCATCA	TCAGCATCATCATCA/TCAGCATCATCATCA	TCAGCATCATCATCATCATCATCATCA/TCAGCATCATCATCATCATCATCATCA	TCAGCATCATCATCATCATCATCATCA/TCAGCATCATCATCATCATCATCATCA	TCAGCATCATCA/TCAGCATCATCATCATCATCATCATCA	TCAGCATCATCATCATCATCATCATCAATC/TCAGCATCATCATCATCATCATCATCAATC
Xunr141	8	4802870	AGGGTATAAATGCACCTCTTAAAAATTATTATAAAAACAG	45.595	TAGTAATTATCGTAACTCAAAGTGGCTACTACAAAATTAG	47.105	TATATATATATATATAT	TATATATAT;TATATATATAT;TATATATATATAT;TATATATATATATATATAT;TATATATATATATATATATAT;TATATATATATATATATATATAT	./.	./.	./.	./.	./.	./.	./.	TATATATATATATATAT/TATATATATATATATAT	./.	./.	./.	./.	./.	./.	./.	./.	./.	./.	./.	TATATATAT/TATATATATAT	./.	./.	./.	./.	./.	./.	./.	./.	./.	./.	./.	./.	./.	./.	./.	./.	./.	./.	./.	./.	./.
Xunr142	8	5466305	AATTCAATGAATGCCAACAACTCAAATGAAAGTTGTCTCT	50.887	AATTCCTGCCAGTCAAATTTTGGGATAATAAATGATCTAC	49.069	AATAAATAAATAAATAAATAAATAAATAAAT	AATAAATAAATAAATAAATAAATAAATAAAT;AATAAATAAAT;AATAAATAAATAAAT;AATAAATAAATAAATAAAT;AATAAATAAATAAATAAATA;AATAAATAAATAAATAAATAAAT;AATAAATAAATAAATAAATAAATAAAT;AATAAATAAATAAATAAATAAATAAATAAATAAAT;AATAAATAAATAAATAAATAAATAAATAAATAAATAAATAAATAAATAAATAAAT	AATAAATAAATAAATAAATAAAT/AATAAATAAATAAATAAATAAAT	AATAAATAAATAAAT/AATAAATAAATAAAT	AATAAATAAATAAATAAATAAATAAATAAAT/AATAAATAAATAAATAAATAAATAAATAAAT	AATAAATAAATAAATAAAT/AATAAATAAATAAATAAAT	AATAAATAAAT/AATAAATAAATAAATAAATAAATAAATAAAT	AATAAATAAATAAATAAATAAATAAATAAAT/AATAAATAAATAAATAAATAAATAAATAAAT	AATAAATAAATAAATAAATAAATAAATAAAT/AATAAATAAATAAATAAATAAATAAATAAAT	AATAAATAAATAAATAAATA/AATAAATAAATAAATAAATA	AATAAATAAATAAATAAATAAATAAATAAAT/AATAAATAAATAAATAAATAAATAAATAAAT	AATAAATAAATAAATAAATAAATAAATAAAT/AATAAATAAATAAATAAATAAATAAATAAAT	AATAAATAAATAAATAAATAAATAAATAAAT/AATAAATAAATAAATAAATAAATAAATAAAT	AATAAATAAATAAATAAATAAATAAATAAAT/AATAAATAAATAAATAAATAAATAAATAAAT	AATAAATAAATAAAT/AATAAATAAATAAAT	AATAAATAAATAAATAAATAAAT/AATAAATAAATAAATAAATAAATAAAT	AATAAATAAATAAATAAATAAATAAATAAAT/AATAAATAAATAAATAAATAAATAAATAAAT	AATAAATAAATAAATAAATAAATAAATAAAT/AATAAATAAATAAATAAATAAATAAATAAAT	AATAAATAAATAAATAAATAAATAAATAAAT/AATAAATAAATAAATAAATAAATAAATAAAT	AATAAATAAATAAATAAATAAATAAATAAAT/AATAAATAAATAAATAAATAAATAAATAAAT	AATAAATAAATAAATAAATAAAT/AATAAATAAATAAATAAATAAAT	AATAAATAAATAAATAAATAAATAAATAAAT/AATAAATAAATAAATAAATAAATAAATAAAT	AATAAATAAATAAATAAATAAATAAATAAAT/AATAAATAAATAAATAAATAAATAAATAAAT	AATAAATAAATAAATAAATAAATAAATAAAT/AATAAATAAATAAATAAATAAATAAATAAAT	AATAAATAAATAAATAAAT/AATAAATAAATAAATAAAT	AATAAATAAATAAATAAATAAAT/AATAAATAAATAAATAAATAAAT	AATAAATAAATAAATAAATAAATAAATAAAT/AATAAATAAATAAATAAATAAATAAATAAAT	AATAAATAAATAAATAAATAAATAAATAAAT/AATAAATAAATAAATAAATAAATAAATAAAT	AATAAATAAATAAATAAATAAATAAATAAAT/AATAAATAAATAAATAAATAAATAAATAAAT	AATAAATAAATAAATAAATAAATAAATAAAT/AATAAATAAATAAATAAATAAATAAATAAAT	AATAAATAAATAAATAAATAAATAAATAAAT/AATAAATAAATAAATAAATAAATAAATAAAT	AATAAATAAATAAATAAATAAATAAATAAAT/AATAAATAAATAAATAAATAAATAAATAAAT	AATAAATAAATAAATAAATAAAT/AATAAATAAATAAATAAATAAATAAATAAATAAAT	AATAAATAAATAAATAAATA/AATAAATAAATAAATAAATA	AATAAATAAATAAATAAATAAATAAATAAAT/AATAAATAAATAAATAAATAAATAAATAAAT	AATAAATAAATAAATAAATAAATAAATAAAT/AATAAATAAATAAATAAATAAATAAATAAAT	AATAAATAAATAAATAAATAAATAAATAAAT/AATAAATAAATAAATAAATAAATAAATAAAT	AATAAATAAATAAATAAATAAAT/AATAAATAAATAAATAAATAAAT	AATAAATAAATAAATAAATAAAT/AATAAATAAATAAATAAATAAAT	AATAAATAAATAAATAAATAAATAAATAAAT/AATAAATAAATAAATAAATAAATAAATAAAT	AATAAATAAATAAATAAATAAATAAATAAAT/AATAAATAAATAAATAAATAAATAAATAAAT	AATAAATAAATAAATAAATAAATAAAT/AATAAATAAATAAATAAATAAATAAAT	AATAAATAAATAAATAAATAAATAAATAAAT/AATAAATAAATAAATAAATAAATAAATAAAT
Xunr143	8	54571803	TGGGAAGAAATTTTGCCTACTCAAAAGTCTTACCTATTTT	49.724	CCGGCAATGAACTCTGGTCCATGGAGGTCAGATGGCTTGC	59.579	TATAGATATAGATATAGATATAGATATAGATATAGATATA	TATAGATATAGATATA;TATAGATATAGATATAGATATA;TATAGATATAGATATAGATATAGATATA;TATAGATATAGATATAGATATAGATATAGATATA;TATAGATATAGATATAGATATAGATATAGATATAGATATAGATATA;TATAGATATAGATATAGATATAGATATAGATATAGATATAGATATAGATATA;TATAGATATAGATATAGATATAGATATAGATATAGATATAGATATAGATATAGATATA;TATAGATATAGATATAGATATAGATATAGATATAGATATAGATATAGATATAGATATAGATATAGATATA;TATAGATATAGATATAGATATAGATATAGATATAGATATAGATATAGATATAGATATAGATATAG…	./.	TATAGATATAGATATAGATATA/TATAGATATAGATATAGATATAGATATAGATATAGATATAGATATAGATATA	TATAGATATAGATATAGATATAGATATA/TATAGATATAGATATAGATATAGATATA	TATAGATATAGATATAGATATAGATATAGATATAGATATA/TATAGATATAGATATAGATATAGATATAGATATAGATATA	TATAGATATAGATATAGATATAGATATAGATATAGATATAGATATA/TATAGATATAGATATAGATATAGATATAGATATAGATATAGATATA	TATAGATATAGATATAGATATAGATATAGATATAGATATA/TATAGATATAGATATAGATATAGATATAGATATAGATATA	TATAGATATAGATATAGATATAGATATAGATATAGATATA/TATAGATATAGATATAGATATAGATATAGATATAGATATA	./.	TATAGATATAGATATAGATATAGATATA/TATAGATATAGATATAGATATAGATATA	TATAGATATAGATATAGATATAGATATAGATATAGATATAGATATA/TATAGATATAGATATAGATATAGATATAGATATAGATATAGATATA	TATAGATATAGATATAGATATAGATATA/TATAGATATAGATATAGATATAGATATA	TATAGATATAGATATAGATATAGATATA/TATAGATATAGATATAGATATAGATATA	./.	TATAGATATAGATATAGATATAGATATAGATATAGATATA/TATAGATATAGATATAGATATAGATATAGATATAGATATA	TATAGATATAGATATAGATATAGATATA/TATAGATATAGATATAGATATAGATATA	TATAGATATAGATATAGATATAGATATA/TATAGATATAGATATAGATATAGATATA	TATAGATATAGATATAGATATAGATATA/TATAGATATAGATATAGATATAGATATAGATATA	TATAGATATAGATATAGATATAGATATAGATATA/TATAGATATAGATATAGATATAGATATAGATATA	./.	TATAGATATAGATATAGATATAGATATAGATATA/TATAGATATAGATATAGATATAGATATAGATATA	TATAGATATAGATATAGATATAGATATA/TATAGATATAGATATAGATATAGATATAGATATAGATATAGATATAGATATAGATATAGATATAGATATAGATATA	TATAGATATAGATATAGATATAGATATAGATATAGATATA/TATAGATATAGATATAGATATAGATATAGATATAGATATA	TATAGATATAGATATAGATATAGATATA/TATAGATATAGATATAGATATAGATATAGATATAGATATAGATATAGATATAGATATAGATATAGATATAGATATA	TATAGATATAGATATAGATATAGATATA/TATAGATATAGATATAGATATAGATATA	TATAGATATAGATATAGATATAGATATA/TATAGATATAGATATAGATATAGATATAGATATAGATATAGATATA	TATAGATATAGATATAGATATAGATATA/TATAGATATAGATATAGATATAGATATA	TATAGATATAGATATAGATATAGATATA/TATAGATATAGATATAGATATAGATATA	TATAGATATAGATATAGATATAGATATAGATATA/TATAGATATAGATATAGATATAGATATAGATATA	TATAGATATAGATATAGATATAGATATA/TATAGATATAGATATAGATATAGATATA	TATAGATATAGATATAGATATAGATATA/TATAGATATAGATATAGATATAGATATA	TATAGATATAGATATAGATATA/TATAGATATAGATATAGATATA	TATAGATATAGATATAGATATAGATATAGATATAGATATA/TATAGATATAGATATAGATATAGATATAGATATAGATATAGATATA	TATAGATATAGATATAGATATAGATATA/TATAGATATAGATATAGATATAGATATA	TATAGATATAGATATAGATATAGATATAGATATAGATATA/TATAGATATAGATATAGATATAGATATAGATATAGATATA	./.	TATAGATATAGATATAGATATAGATATA/TATAGATATAGATATAGATATAGATATA	TATAGATATAGATATAGATATAGATATAGATATAGATATAGATATAGATATA/TATAGATATAGATATAGATATAGATATAGATATAGATATAGATATAGATATA	TATAGATATAGATATAGATATAGATATA/TATAGATATAGATATAGATATAGATATA	TATAGATATAGATATAGATATAGATATA/TATAGATATAGATATAGATATAGATATA	TATAGATATAGATATAGATATAGATATAGATATAGATATA/TATAGATATAGATATAGATATAGATATAGATATAGATATAGATATA	TATAGATATAGATATAGATATAGATATAGATATAGATATA/TATAGATATAGATATAGATATAGATATAGATATAGATATA
Xunr144	8	60104119	AAGTATCTATGCCTAATATTAAAGAGAGAATTTCTTTCTC	45.514	TATTATTGCTCTTAGTAAAAACCGGCTAGGACTCATGCTC	51.745	TCTCTCTCTCTCTCTC	TCTCTCTCTCTCTC;TCTCTCTCTCTCTCTCTC;TCTCTCTCTCTCTCTCTCTC;TCTCTCTCTCTCTCTCTCTCTC;TCTCTCTCTCTCTCTCTCTCTCTCTCTC	./.	TCTCTCTCTCTCTCTC/TCTCTCTCTCTCTCTC	TCTCTCTCTCTCTC/TCTCTCTCTCTCTCTC	./.	TCTCTCTCTCTCTCTC/TCTCTCTCTCTCTCTCTCTCTCTCTCTC	TCTCTCTCTCTCTCTCTCTCTC/TCTCTCTCTCTCTCTCTCTCTC	TCTCTCTCTCTCTC/TCTCTCTCTCTCTCTC	TCTCTCTCTCTCTCTCTC/TCTCTCTCTCTCTCTCTCTC	./.	TCTCTCTCTCTCTCTC/TCTCTCTCTCTCTCTC	TCTCTCTCTCTCTCTC/TCTCTCTCTCTCTCTC	TCTCTCTCTCTCTCTCTCTC/TCTCTCTCTCTCTCTCTCTCTC	./.	TCTCTCTCTCTCTCTCTCTC/TCTCTCTCTCTCTCTCTCTCTC	./.	TCTCTCTCTCTCTCTC/TCTCTCTCTCTCTCTC	TCTCTCTCTCTCTCTCTC/TCTCTCTCTCTCTCTCTCTC	./.	./.	TCTCTCTCTCTCTCTC/TCTCTCTCTCTCTCTC	TCTCTCTCTCTCTCTC/TCTCTCTCTCTCTCTCTC	TCTCTCTCTCTCTCTC/TCTCTCTCTCTCTCTCTC	./.	TCTCTCTCTCTCTCTCTC/TCTCTCTCTCTCTCTCTC	TCTCTCTCTCTCTC/TCTCTCTCTCTCTCTC	TCTCTCTCTCTCTC/TCTCTCTCTCTCTCTC	./.	TCTCTCTCTCTCTCTC/TCTCTCTCTCTCTCTC	TCTCTCTCTCTCTCTC/TCTCTCTCTCTCTCTC	TCTCTCTCTCTCTCTCTCTC/TCTCTCTCTCTCTCTCTCTCTC	./.	TCTCTCTCTCTCTCTCTC/TCTCTCTCTCTCTCTCTC	TCTCTCTCTCTCTC/TCTCTCTCTCTCTCTC	TCTCTCTCTCTCTC/TCTCTCTCTCTCTCTC	./.	./.	./.	TCTCTCTCTCTCTCTCTCTC/TCTCTCTCTCTCTCTCTCTCTC	TCTCTCTCTCTCTC/TCTCTCTCTCTCTCTC	./.	./.
Xunr145	8	60476031	CGCCGGCCGGTCTGGGACACGGCGACGTCCACGGCCGGTC	69.775	GCTCTCGCGCGAGTGGCGTCAATGTCGTCTGTCACATGAT	60.964	CACACCACTCCACTCCACTCGACTCCA	CACACCACT;CACACCACTC;CACACCACTCCACTCCA;CACACCACTCCACTCCACTCGA;CACACCACTCCACTCCACTCGACTCCACACCA	CACACCACTCCACTCCACTCGA/CACACCACTCCACTCCACTCGACTCCA	CACACCACTCCACTCCACTCGACTCCACACCA/CACACCACTCCACTCCACTCGACTCCACACCA	CACACCACTCCACTCCACTCGACTCCA/CACACCACTCCACTCCACTCGACTCCA	CACACCACTCCACTCCACTCGACTCCA/CACACCACTCCACTCCACTCGACTCCA	CACACCACTCCACTCCACTCGACTCCA/CACACCACTCCACTCCACTCGACTCCA	CACACCACTCCACTCCACTCGACTCCA/CACACCACTCCACTCCACTCGACTCCA	CACACCACTCCACTCCACTCGACTCCA/CACACCACTCCACTCCACTCGACTCCA	./.	CACACCACTCCACTCCACTCGACTCCACACCA/CACACCACTCCACTCCACTCGACTCCACACCA	CACACCACTCCACTCCACTCGACTCCA/CACACCACTCCACTCCACTCGACTCCA	CACACCACTCCACTCCACTCGACTCCA/CACACCACTCCACTCCACTCGACTCCA	CACACCACTCCACTCCACTCGACTCCA/CACACCACTCCACTCCACTCGACTCCA	CACACCACTCCACTCCACTCGACTCCA/CACACCACTCCACTCCACTCGACTCCA	CACACCACTCCACTCCACTCGA/CACACCACTCCACTCCACTCGA	CACACCACTCCACTCCACTCGACTCCACACCA/CACACCACTCCACTCCACTCGACTCCACACCA	CACACCACTCCACTCCACTCGACTCCA/CACACCACTCCACTCCACTCGACTCCA	CACACCACTCCACTCCACTCGACTCCA/CACACCACTCCACTCCACTCGACTCCA	CACACCACTCCACTCCACTCGACTCCACACCA/CACACCACTCCACTCCACTCGACTCCACACCA	CACACCACTCCACTCCACTCGA/CACACCACTCCACTCCACTCGACTCCA	CACACCACTCCACTCCACTCGACTCCA/CACACCACTCCACTCCACTCGACTCCA	CACACCACTCCACTCCACTCGACTCCA/CACACCACTCCACTCCACTCGACTCCA	CACACCACTCCACTCCACTCGACTCCA/CACACCACTCCACTCCACTCGACTCCA	CACACCACTCCACTCCACTCGACTCCA/CACACCACTCCACTCCACTCGACTCCA	CACACCACTCCACTCCACTCGACTCCA/CACACCACTCCACTCCACTCGACTCCA	CACACCACTCCACTCCACTCGACTCCA/CACACCACTCCACTCCACTCGACTCCA	CACACCACTCCACTCCACTCGACTCCA/CACACCACTCCACTCCACTCGACTCCA	CACACCACTCCACTCCACTCGACTCCA/CACACCACTCCACTCCACTCGACTCCA	CACACCACTCCACTCCACTCGACTCCA/CACACCACTCCACTCCACTCGACTCCA	CACACCACTCCACTCCACTCGACTCCA/CACACCACTCCACTCCACTCGACTCCA	CACACCACTCCACTCCACTCGACTCCA/CACACCACTCCACTCCACTCGACTCCA	CACACCACTCCACTCCACTCGACTCCA/CACACCACTCCACTCCACTCGACTCCA	CACACCACTCCACTCCACTCGACTCCA/CACACCACTCCACTCCACTCGACTCCA	CACACCACTCCACTCCACTCGACTCCA/CACACCACTCCACTCCACTCGACTCCA	CACACCACTCCACTCCACTCGACTCCA/CACACCACTCCACTCCACTCGACTCCA	CACACCACTCCACTCCACTCGACTCCACACCA/CACACCACTCCACTCCACTCGACTCCACACCA	CACACCACTCCACTCCACTCGACTCCA/CACACCACTCCACTCCACTCGACTCCA	CACACCACTCCACTCCACTCGA/CACACCACTCCACTCCACTCGA	CACACCACTCCACTCCACTCGACTCCA/CACACCACTCCACTCCACTCGACTCCA	CACACCACTCCACTCCACTCGACTCCA/CACACCACTCCACTCCACTCGACTCCA	CACACCACTCCACTCCACTCGACTCCA/CACACCACTCCACTCCACTCGACTCCA	CACACCACTCCACTCCACTCGACTCCA/CACACCACTCCACTCCACTCGACTCCA
Xunr146	8	61172605	AATTAAGTAGCTACATACTTTACTTCGTCATACTAGTTGG	47.854	AAAATCCTTAGGCCACTGCATGAAACAAAATCCAAATTGA	52.058	TATATATAAACATATATATATA	TATATATAAA;TATATATAAACA;TATATATAAACATA;TATATATAAACATATATA;TATATATAAACATATATATA;TATATATAAACATATATATATATA;TATATATAAACATATATATATATATA;TATATATAAACATATATATATATATATATA	TATATATAAACATATATATA/TATATATAAACATATATATATATA	TATATATAAACATATATATATA/TATATATAAACATATATATATA	TATATATAAACATATATATATATATA/TATATATAAACATATATATATATATA	TATATATAAACATATATATATA/TATATATAAACATATATATATA	TATATATAAACATATATATATA/TATATATAAACATATATATATA	./.	TATATATAAACATATATATATA/TATATATAAACATATATATATA	TATATATAAACATATATATATA/TATATATAAACATATATATATA	./.	TATATATAAACATATATATA/TATATATAAACATATATATA	TATATATAAACATATATATATA/TATATATAAACATATATATATA	TATATATAAACATATATATATATATA/TATATATAAACATATATATATATATA	TATATATAAACATATATATATA/TATATATAAACATATATATATA	TATATATAAACATATATATA/TATATATAAACATATATATATA	./.	TATATATAAACATATATATATATATA/TATATATAAACATATATATATATATA	TATATATAAACATATATATATATA/TATATATAAACATATATATATATA	TATATATAAACATATATATATATATATATA/TATATATAAACATATATATATATATATATA	./.	TATATATAAACATATATATATA/TATATATAAACATATATATATA	./.	TATATATAAACATATATATATATATA/TATATATAAACATATATATATATATA	./.	TATATATAAACATATATATATATA/TATATATAAACATATATATATATA	TATATATAAACATATATATATA/TATATATAAACATATATATATA	TATATATAAACATATATATATA/TATATATAAACATATATATATA	./.	TATATATAAACATATATATATA/TATATATAAACATATATATATA	TATATATAAACATATATATATA/TATATATAAACATATATATATA	TATATATAAACATATATATA/TATATATAAACATATATATATATATA	./.	TATATATAAACATATATATATA/TATATATAAACATATATATATA	./.	TATATATAAACATATATATATATATA/TATATATAAACATATATATATATATA	./.	TATATATAAACATATATATATATATA/TATATATAAACATATATATATATATA	TATATATAAACATATATATATATA/TATATATAAACATATATATATATA	TATATATAAACATATATATATATA/TATATATAAACATATATATATATATA	TATATATAAACATATATATATA/TATATATAAACATATATATATA	TATATATAAACATATATATATA/TATATATAAACATATATATATATA	./.
Xunr147	9	1584453	TCGTCGCTTTACCACCGTGCTGCATTGCTGAAAGCCTAAA	58.769	GCCGTGGGGGACACAAATCTGGAGGGGTCATGTACCTTGG	60.094	ATGGATGGATGGATGGATGGATGGATGGATGGATGGATGGATGG	ATGGATGGATGG;ATGGATGGATGGATGG;ATGGATGGATGGATGGAT;ATGGATGGATGGATGGATG;ATGGATGGATGGATGGATGG;ATGGATGGATGGATGGATGGATGG;ATGGATGGATGGATGGATGGATGGATGG;ATGGATGGATGGATGGATGGATGGATGGATGG;ATGGATGGATGGATGGATGGATGGATGGATGGATGG;ATGGATGGATGGATGGATGGATGGATGGATGGATGGATGG	ATGGATGGATGGATGGATGGATGGATGG/ATGGATGGATGGATGGATGGATGGATGG	ATGGATGGATGGATGGATGGATGG/ATGGATGGATGGATGGATGGATGG	ATGGATGGATGGATGGATGGATGGATGGATGG/ATGGATGGATGGATGGATGGATGGATGGATGG	ATGGATGGATGGATGGATGGATGGATGGATGGATGGATGG/ATGGATGGATGGATGGATGGATGGATGGATGGATGGATGG	ATGGATGGATGGATGGATGGATGG/ATGGATGGATGGATGGATGGATGG	ATGGATGGATGGATGGATGGATGGATGGATGG/ATGGATGGATGGATGGATGGATGGATGGATGG	ATGGATGGATGGATGGATGGATGGATGG/ATGGATGGATGGATGGATGGATGGATGG	ATGGATGGATGGATGGATGGATGG/ATGGATGGATGGATGGATGGATGG	ATGGATGGATGGATGGATGGATGGATGG/ATGGATGGATGGATGGATGGATGGATGG	ATGGATGGATGGATGGATGGATGGATGG/ATGGATGGATGGATGGATGGATGGATGGATGG	ATGGATGGATGGATGGATGGATGGATGGATGG/ATGGATGGATGGATGGATGGATGGATGGATGG	ATGGATGGATGGATGGATGGATGGATGGATGG/ATGGATGGATGGATGGATGGATGGATGGATGG	ATGGATGGATGGATGGATGGATGG/ATGGATGGATGGATGGATGGATGG	ATGGATGGATGGATGGATGGATGGATGG/ATGGATGGATGGATGGATGGATGGATGGATGGATGG	ATGGATGGATGGATGGATGGATGGATGGATGG/ATGGATGGATGGATGGATGGATGGATGGATGG	ATGGATGGATGGATGGATGGATGG/ATGGATGGATGGATGGATGGATGGATGG	ATGGATGGATGGATGGATGGATGGATGGATGG/ATGGATGGATGGATGGATGGATGGATGGATGG	ATGGATGGATGGATGGATGGATGGATGG/ATGGATGGATGGATGGATGGATGGATGG	ATGGATGGATGGATGGATGGATGGATGGATGG/ATGGATGGATGGATGGATGGATGGATGGATGG	ATGGATGGATGGATGGATGGATGGATGG/ATGGATGGATGGATGGATGGATGGATGG	ATGGATGGATGGATGGATGGATGGATGGATGG/ATGGATGGATGGATGGATGGATGGATGGATGGATGG	ATGGATGGATGGATGGATGGATGGATGGATGGATGGATGG/ATGGATGGATGGATGGATGGATGGATGGATGGATGGATGGATGG	ATGGATGGATGGATGGATGGATGGATGGATGG/ATGGATGGATGGATGGATGGATGGATGGATGGATGG	ATGGATGGATGGATGGATGGATGG/ATGGATGGATGGATGGATGGATGG	ATGGATGGATGGATGGATGGATGGATGGATGG/ATGGATGGATGGATGGATGGATGGATGGATGGATGGATGGATGG	ATGGATGGATGGATGGATGGATGGATGGATGG/ATGGATGGATGGATGGATGGATGGATGGATGG	ATGGATGGATGGATGGATGGATGGATGGATGG/ATGGATGGATGGATGGATGGATGGATGGATGG	ATGGATGGATGGATGGATGGATGGATGG/ATGGATGGATGGATGGATGGATGGATGG	ATGGATGGATGGATGGATGGATGGATGGATGG/ATGGATGGATGGATGGATGGATGGATGGATGG	ATGGATGGATGGATGGATGGATGGATGGATGG/ATGGATGGATGGATGGATGGATGGATGGATGG	ATGGATGGATGGATGGATGGATGGATGGATGG/ATGGATGGATGGATGGATGGATGGATGGATGG	ATGGATGGATGGATGGATGGATGG/ATGGATGGATGGATGGATGGATGG	ATGGATGGATGGATGGATGGATGGATGG/ATGGATGGATGGATGGATGGATGGATGG	ATGGATGGATGGATGGATGGATGGATGGATGGATGGATGGATGG/ATGGATGGATGGATGGATGGATGGATGGATGGATGGATGGATGG	ATGGATGGATGGATGGATGGATGG/ATGGATGGATGGATGGATGGATGGATGGATGGATGGATGGATGG	ATGGATGGATGGATGGATGGATGGATGGATGG/ATGGATGGATGGATGGATGGATGGATGGATGG	ATGGATGGATGGATGGATGGATGGATGG/ATGGATGGATGGATGGATGGATGGATGG	ATGGATGGATGGATGGATGGATGGATGGATGGATGG/ATGGATGGATGGATGGATGGATGGATGGATGGATGG	ATGGATGGATGGATGGATG/ATGGATGGATGGATGGATGG	ATGGATGGATGGATGGATGGATGGATGGATGG/ATGGATGGATGGATGGATGGATGGATGGATGG	ATGGATGGATGGATGGATGGATGGATGGATGG/ATGGATGGATGGATGGATGGATGGATGGATGGATGG
Xunr148	9	2107363	ATATATAGCTCTCGTAGCCATGGAGACTGGAGAGAGTGAC	53.583	CACACACGTACTGACATGATCAATCTCGTCCCTCCCAATC	55.651	TAGCTCTAGTTCTAGCTCTAGCTCTAGCTCTAGCT	TAGCTCTAGTTCTAGCT;TAGCTCTAGTTCTAGCTCTAGCT;TAGCTCTAGTTCTAGCTCTAGCTCTAGCT;TAGCTCTAGTTCTAGCTCTAGCTCTAGCTCTAGCTC;TAGCTCTAGTTCTAGCTCTAGCTCTAGCTCTAGCTCTAGCT;TAGCTCTAGTTCTAGCTCTAGCTCTAGCTCTAGCTCTAGCTC;TAGCTCTAGTTCTAGCTCTAGCTCTAGCTCTAGCTCTAGCTCTAGCT;TAGCTCTAGTTCTAGCTCTAGCTCTAGCTCTAGCTCTAGCTCTAGCTC	TAGCTCTAGTTCTAGCTCTAGCTCTAGCTCTAGCT/TAGCTCTAGTTCTAGCTCTAGCTCTAGCTCTAGCT	TAGCTCTAGTTCTAGCTCTAGCTCTAGCTCTAGCT/TAGCTCTAGTTCTAGCTCTAGCTCTAGCTCTAGCT	TAGCTCTAGTTCTAGCTCTAGCTCTAGCTCTAGCT/TAGCTCTAGTTCTAGCTCTAGCTCTAGCTCTAGCT	TAGCTCTAGTTCTAGCTCTAGCTCTAGCTCTAGCT/TAGCTCTAGTTCTAGCTCTAGCTCTAGCTCTAGCT	TAGCTCTAGTTCTAGCTCTAGCTCTAGCTCTAGCT/TAGCTCTAGTTCTAGCTCTAGCTCTAGCTCTAGCT	TAGCTCTAGTTCTAGCTCTAGCTCTAGCTCTAGCT/TAGCTCTAGTTCTAGCTCTAGCTCTAGCTCTAGCT	TAGCTCTAGTTCTAGCTCTAGCTCTAGCTCTAGCT/TAGCTCTAGTTCTAGCTCTAGCTCTAGCTCTAGCT	TAGCTCTAGTTCTAGCTCTAGCTCTAGCTCTAGCT/TAGCTCTAGTTCTAGCTCTAGCTCTAGCTCTAGCT	TAGCTCTAGTTCTAGCTCTAGCTCTAGCTCTAGCT/TAGCTCTAGTTCTAGCTCTAGCTCTAGCTCTAGCT	TAGCTCTAGTTCTAGCTCTAGCTCTAGCTCTAGCT/TAGCTCTAGTTCTAGCTCTAGCTCTAGCTCTAGCT	TAGCTCTAGTTCTAGCTCTAGCTCTAGCTCTAGCT/TAGCTCTAGTTCTAGCTCTAGCTCTAGCTCTAGCT	TAGCTCTAGTTCTAGCTCTAGCTCTAGCTCTAGCT/TAGCTCTAGTTCTAGCTCTAGCTCTAGCTCTAGCT	TAGCTCTAGTTCTAGCTCTAGCTCTAGCTCTAGCT/TAGCTCTAGTTCTAGCTCTAGCTCTAGCTCTAGCT	TAGCTCTAGTTCTAGCTCTAGCTCTAGCTCTAGCT/TAGCTCTAGTTCTAGCTCTAGCTCTAGCTCTAGCT	TAGCTCTAGTTCTAGCTCTAGCTCTAGCTCTAGCT/TAGCTCTAGTTCTAGCTCTAGCTCTAGCTCTAGCT	TAGCTCTAGTTCTAGCTCTAGCTCTAGCTCTAGCT/TAGCTCTAGTTCTAGCTCTAGCTCTAGCTCTAGCT	TAGCTCTAGTTCTAGCTCTAGCTCTAGCTCTAGCT/TAGCTCTAGTTCTAGCTCTAGCTCTAGCTCTAGCTCTAGCTCTAGCT	TAGCTCTAGTTCTAGCTCTAGCTCTAGCTCTAGCTCTAGCTCTAGCT/TAGCTCTAGTTCTAGCTCTAGCTCTAGCTCTAGCTCTAGCTCTAGCT	TAGCTCTAGTTCTAGCTCTAGCTCTAGCTCTAGCTCTAGCTCTAGCT/TAGCTCTAGTTCTAGCTCTAGCTCTAGCTCTAGCTCTAGCTCTAGCT	TAGCTCTAGTTCTAGCTCTAGCTCTAGCTCTAGCTCTAGCT/TAGCTCTAGTTCTAGCTCTAGCTCTAGCTCTAGCTCTAGCT	TAGCTCTAGTTCTAGCTCTAGCTCTAGCTCTAGCT/TAGCTCTAGTTCTAGCTCTAGCTCTAGCTCTAGCT	TAGCTCTAGTTCTAGCTCTAGCTCTAGCTCTAGCT/TAGCTCTAGTTCTAGCTCTAGCTCTAGCTCTAGCT	TAGCTCTAGTTCTAGCTCTAGCTCTAGCTCTAGCT/TAGCTCTAGTTCTAGCTCTAGCTCTAGCTCTAGCT	TAGCTCTAGTTCTAGCTCTAGCTCTAGCTCTAGCT/TAGCTCTAGTTCTAGCTCTAGCTCTAGCTCTAGCT	TAGCTCTAGTTCTAGCTCTAGCTCTAGCTCTAGCT/TAGCTCTAGTTCTAGCTCTAGCTCTAGCTCTAGCT	TAGCTCTAGTTCTAGCTCTAGCTCTAGCTCTAGCT/TAGCTCTAGTTCTAGCTCTAGCTCTAGCTCTAGCT	TAGCTCTAGTTCTAGCTCTAGCTCTAGCTCTAGCT/TAGCTCTAGTTCTAGCTCTAGCTCTAGCTCTAGCT	TAGCTCTAGTTCTAGCTCTAGCTCTAGCTCTAGCT/TAGCTCTAGTTCTAGCTCTAGCTCTAGCTCTAGCT	TAGCTCTAGTTCTAGCTCTAGCTCTAGCTCTAGCT/TAGCTCTAGTTCTAGCTCTAGCTCTAGCTCTAGCT	TAGCTCTAGTTCTAGCTCTAGCTCTAGCTCTAGCT/TAGCTCTAGTTCTAGCTCTAGCTCTAGCTCTAGCT	TAGCTCTAGTTCTAGCTCTAGCTCTAGCTCTAGCT/TAGCTCTAGTTCTAGCTCTAGCTCTAGCTCTAGCT	TAGCTCTAGTTCTAGCTCTAGCTCTAGCTCTAGCT/TAGCTCTAGTTCTAGCTCTAGCTCTAGCTCTAGCT	TAGCTCTAGTTCTAGCTCTAGCTCTAGCTCTAGCT/TAGCTCTAGTTCTAGCTCTAGCTCTAGCTCTAGCT	TAGCTCTAGTTCTAGCTCTAGCTCTAGCTCTAGCT/TAGCTCTAGTTCTAGCTCTAGCTCTAGCTCTAGCT	TAGCTCTAGTTCTAGCTCTAGCTCTAGCTCTAGCT/TAGCTCTAGTTCTAGCTCTAGCTCTAGCTCTAGCT	TAGCTCTAGTTCTAGCTCTAGCTCTAGCTCTAGCT/TAGCTCTAGTTCTAGCTCTAGCTCTAGCTCTAGCT	TAGCTCTAGTTCTAGCTCTAGCTCTAGCTCTAGCT/TAGCTCTAGTTCTAGCTCTAGCTCTAGCTCTAGCT	TAGCTCTAGTTCTAGCTCTAGCTCTAGCTCTAGCT/TAGCTCTAGTTCTAGCTCTAGCTCTAGCTCTAGCT	TAGCTCTAGTTCTAGCTCTAGCTCTAGCTCTAGCT/TAGCTCTAGTTCTAGCTCTAGCTCTAGCTCTAGCT	TAGCTCTAGTTCTAGCTCTAGCTCTAGCTCTAGCTC/TAGCTCTAGTTCTAGCTCTAGCTCTAGCTCTAGCTCTAGCTCTAGCT	TAGCTCTAGTTCTAGCTCTAGCTCTAGCTCTAGCT/TAGCTCTAGTTCTAGCTCTAGCTCTAGCTCTAGCT
Xunr149	9	2134318	GATACAGCCTTGATGAGAGGCTGAGGATGTTGGACACAAT	55.224	GTCTCTGATCCAGCCCGTCTCGCCGAATCTAGAGCTTTTC	57.783	AGCAGCAGCAGCAGCAGCAG	AGCAGCAGCAGCAGCAGCAG;AGCAGCAGCAG;AGCAGCAGCAGCAG;AGCAGCAGCAGCAGCAG;AGCAGCAGCAGCAGCAGCAGCAG;AGCAGCAGCAGCAGCAGCAGCAGCAG;AGCAGCAGCAGCAGCAGCAGCAGCAGCAG;AGCAGCAGCAGCAGCAGCAGCAGCAGCAGCAG;AGCAGCAGCAGCAGCAGCAGCAGCAGCAGCAGCAG;AGCAGCAGCAGCAGCAGCAGCAGCAGCAGCAGCAGCAG;AGCAGCAGCAGCAGCAGCAGCAGCAGCAGCAGCAGCAGCAG;AGCAGCAGCAGCAGCAGCAGCAGCAGCAGCAGCAGCAGCAGCAGCAGCAGCAGCAGCAG	AGCAGCAGCAGCAGCAGCAGCAGCAGCAGCAG/AGCAGCAGCAGCAGCAGCAGCAGCAGCAGCAGCAG	AGCAGCAGCAGCAGCAGCAGCAGCAGCAG/AGCAGCAGCAGCAGCAGCAGCAGCAGCAG	AGCAGCAGCAGCAGCAGCAG/AGCAGCAGCAGCAGCAGCAG	AGCAGCAGCAGCAGCAGCAGCAGCAGCAG/AGCAGCAGCAGCAGCAGCAGCAGCAGCAG	AGCAGCAGCAGCAGCAGCAG/AGCAGCAGCAGCAGCAGCAG	AGCAGCAGCAGCAGCAG/AGCAGCAGCAGCAGCAGCAGCAGCAGCAGCAGCAG	AGCAGCAGCAGCAGCAGCAG/AGCAGCAGCAGCAGCAGCAG	AGCAGCAGCAGCAGCAGCAGCAGCAGCAGCAGCAG/AGCAGCAGCAGCAGCAGCAGCAGCAGCAGCAGCAG	AGCAGCAGCAGCAGCAGCAG/AGCAGCAGCAGCAGCAGCAG	AGCAGCAGCAGCAGCAGCAG/AGCAGCAGCAGCAGCAGCAG	AGCAGCAGCAGCAGCAGCAG/AGCAGCAGCAGCAGCAGCAG	AGCAGCAGCAGCAGCAG/AGCAGCAGCAGCAGCAGCAGCAGCAGCAGCAGCAG	AGCAGCAGCAGCAGCAGCAGCAGCAGCAGCAG/AGCAGCAGCAGCAGCAGCAGCAGCAGCAGCAG	AGCAGCAGCAGCAGCAGCAG/AGCAGCAGCAGCAGCAGCAGCAGCAGCAG	AGCAGCAGCAGCAGCAGCAG/AGCAGCAGCAGCAGCAGCAG	AGCAGCAGCAGCAGCAGCAG/AGCAGCAGCAGCAGCAGCAG	AGCAGCAGCAGCAGCAGCAG/AGCAGCAGCAGCAGCAGCAG	AGCAGCAGCAGCAGCAGCAGCAGCAGCAGCAGCAG/AGCAGCAGCAGCAGCAGCAGCAGCAGCAGCAGCAG	AGCAGCAGCAGCAGCAGCAGCAGCAGCAGCAGCAG/AGCAGCAGCAGCAGCAGCAGCAGCAGCAGCAGCAG	AGCAGCAGCAGCAGCAGCAG/AGCAGCAGCAGCAGCAGCAGCAGCAGCAG	AGCAGCAGCAGCAGCAG/AGCAGCAGCAGCAGCAGCAGCAGCAGCAGCAGCAG	AGCAGCAGCAGCAGCAGCAG/AGCAGCAGCAGCAGCAGCAG	AGCAGCAGCAGCAGCAGCAG/AGCAGCAGCAGCAGCAGCAGCAGCAGCAGCAG	AGCAGCAGCAGCAGCAGCAGCAGCAGCAG/AGCAGCAGCAGCAGCAGCAGCAGCAGCAGCAGCAGCAG	AGCAGCAGCAGCAGCAGCAG/AGCAGCAGCAGCAGCAGCAG	AGCAGCAGCAGCAGCAG/AGCAGCAGCAGCAGCAGCAGCAGCAGCAG	AGCAGCAGCAGCAGCAGCAG/AGCAGCAGCAGCAGCAGCAG	AGCAGCAGCAGCAGCAG/AGCAGCAGCAGCAGCAGCAGCAGCAGCAGCAGCAGCAGCAG	AGCAGCAGCAGCAGCAGCAG/AGCAGCAGCAGCAGCAGCAG	AGCAGCAGCAGCAGCAGCAG/AGCAGCAGCAGCAGCAGCAG	AGCAGCAGCAGCAGCAGCAGCAGCAGCAG/AGCAGCAGCAGCAGCAGCAGCAGCAGCAGCAG	AGCAGCAGCAGCAGCAGCAGCAGCAGCAGCAGCAG/AGCAGCAGCAGCAGCAGCAGCAGCAGCAGCAGCAG	AGCAGCAGCAGCAGCAG/AGCAGCAGCAGCAGCAGCAGCAGCAGCAGCAGCAGCAGCAG	AGCAGCAGCAGCAGCAGCAG/AGCAGCAGCAGCAGCAGCAG	AGCAGCAGCAGCAGCAGCAG/AGCAGCAGCAGCAGCAGCAG	AGCAGCAGCAGCAGCAGCAG/AGCAGCAGCAGCAGCAGCAG	AGCAGCAGCAGCAGCAGCAGCAGCAGCAGCAGCAG/AGCAGCAGCAGCAGCAGCAGCAGCAGCAGCAGCAG	AGCAGCAGCAGCAGCAGCAG/AGCAGCAGCAGCAGCAGCAG	AGCAGCAGCAGCAGCAGCAG/AGCAGCAGCAGCAGCAGCAG	AGCAGCAGCAGCAGCAGCAG/AGCAGCAGCAGCAGCAGCAGCAGCAGCAGCAG	AGCAGCAGCAGCAGCAGCAG/AGCAGCAGCAGCAGCAGCAG
Xunr150	9	5511797	TTCCGATGGATTCGTCGCGAGAAACATCAATCAATCAAGC	55.595	TCTCGCGCCATACCACCTAGCCGCGGAGAGACGAATGAAG	61.009	ATATATATATATATATATA	ATATATATATATATA;ATATATATATATATATA;ATATATATATATATATATATA;ATATATATATATATATATATATA	ATATATATATATATATATA/ATATATATATATATATATATA	ATATATATATATATA/ATATATATATATATA	ATATATATATATATATATA/ATATATATATATATATATA	ATATATATATATATATA/ATATATATATATATATATATA	./.	./.	ATATATATATATATATATA/ATATATATATATATATATATA	./.	ATATATATATATATATA/ATATATATATATATATATA	./.	ATATATATATATATATATA/ATATATATATATATATATA	ATATATATATATATATA/ATATATATATATATATATA	./.	ATATATATATATATATATA/ATATATATATATATATATATA	ATATATATATATATATATATA/ATATATATATATATATATATA	ATATATATATATATATATA/ATATATATATATATATATA	ATATATATATATATATA/ATATATATATATATATA	ATATATATATATATATA/ATATATATATATATATATA	./.	./.	./.	ATATATATATATATATATA/ATATATATATATATATATATA	./.	ATATATATATATATATATA/ATATATATATATATATATA	./.	ATATATATATATATATA/ATATATATATATATATATA	ATATATATATATATATA/ATATATATATATATATATA	ATATATATATATATATATA/ATATATATATATATATATATATA	ATATATATATATATATA/ATATATATATATATATATA	ATATATATATATATATA/ATATATATATATATATATA	./.	./.	ATATATATATATATATA/ATATATATATATATATATA	ATATATATATATATATA/ATATATATATATATATATA	ATATATATATATATATA/ATATATATATATATATATA	ATATATATATATATATA/ATATATATATATATATATA	ATATATATATATATA/ATATATATATATATA	ATATATATATATATATA/ATATATATATATATATATA	ATATATATATATATATATA/ATATATATATATATATATATA	ATATATATATATATATA/ATATATATATATATATATA	ATATATATATATATATATATA/ATATATATATATATATATATA
Xgma5	9	48460761	TGTGGGATTTCGCTTCTCGAGGGAACGGAATTACGGGAAG	57.797	GCCAAATCAAAGCTAGACTCGACGCTAGTGCCATGTGACG	57.776	GGATGGGATGGGATGGGATGGGATGG	GGATGGGATGG;GGATGGGATGGGATGG;GGATGGGATGGGATGGGATGG;GGATGGGATGGGATGGGATGGGATGGGATGG;GGATGGGATGGGATGGGATGGGATGGGATGGGATGG;GGATGGGATGGGATGGGATGGGATGGGATGGGATGGGATGGGATGGGATGGGATGGGATGGGATGGGATG	GGATGGGATGGGATGGGATGGGATGG/GGATGGGATGGGATGGGATGGGATGG	GGATGGGATGGGATGGGATGGGATGG/GGATGGGATGGGATGGGATGGGATGG	GGATGGGATGGGATGGGATGGGATGG/GGATGGGATGGGATGGGATGGGATGG	GGATGGGATGGGATGGGATGGGATGG/GGATGGGATGGGATGGGATGGGATGG	GGATGGGATGGGATGGGATGGGATGG/GGATGGGATGGGATGGGATGGGATGG	GGATGGGATGGGATGGGATGGGATGG/GGATGGGATGGGATGGGATGGGATGG	GGATGGGATGGGATGGGATGGGATGG/GGATGGGATGGGATGGGATGGGATGG	GGATGGGATGGGATGGGATGG/GGATGGGATGGGATGGGATGG	GGATGGGATGGGATGGGATGGGATGG/GGATGGGATGGGATGGGATGGGATGG	GGATGGGATGGGATGGGATGGGATGG/GGATGGGATGGGATGGGATGGGATGGGATGG	GGATGGGATGGGATGGGATGGGATGG/GGATGGGATGGGATGGGATGGGATGG	GGATGGGATGGGATGGGATGGGATGG/GGATGGGATGGGATGGGATGGGATGG	GGATGGGATGGGATGGGATGG/GGATGGGATGGGATGGGATGG	GGATGGGATGGGATGGGATGGGATGG/GGATGGGATGGGATGGGATGGGATGG	GGATGGGATGGGATGGGATGGGATGG/GGATGGGATGGGATGGGATGGGATGGGATGG	GGATGGGATGGGATGGGATGGGATGG/GGATGGGATGGGATGGGATGGGATGG	GGATGGGATGGGATGGGATGGGATGG/GGATGGGATGGGATGGGATGGGATGG	GGATGGGATGGGATGGGATGGGATGG/GGATGGGATGGGATGGGATGGGATGG	GGATGGGATGGGATGGGATGGGATGGGATGG/GGATGGGATGGGATGGGATGGGATGGGATGG	GGATGGGATGGGATGGGATGG/GGATGGGATGGGATGGGATGGGATGGGATGG	GGATGGGATGGGATGGGATGGGATGG/GGATGGGATGGGATGGGATGGGATGG	GGATGGGATGGGATGGGATGGGATGG/GGATGGGATGGGATGGGATGGGATGG	GGATGGGATGGGATGGGATGGGATGG/GGATGGGATGGGATGGGATGGGATGG	GGATGGGATGGGATGGGATGGGATGG/GGATGGGATGGGATGGGATGGGATGG	GGATGGGATGGGATGGGATGGGATGG/GGATGGGATGGGATGGGATGGGATGG	GGATGGGATGGGATGGGATGGGATGG/GGATGGGATGGGATGGGATGGGATGG	GGATGGGATGGGATGGGATGGGATGG/GGATGGGATGGGATGGGATGGGATGG	GGATGGGATGGGATGGGATGGGATGG/GGATGGGATGGGATGGGATGGGATGG	GGATGGGATGGGATGGGATGGGATGG/GGATGGGATGGGATGGGATGGGATGG	GGATGGGATGGGATGGGATGGGATGG/GGATGGGATGGGATGGGATGGGATGG	GGATGGGATGGGATGGGATGGGATGG/GGATGGGATGGGATGGGATGGGATGG	GGATGGGATGGGATGG/GGATGGGATGGGATGGGATGG	GGATGGGATGGGATGGGATGGGATGGGATGG/GGATGGGATGGGATGGGATGGGATGGGATGG	GGATGGGATGGGATGGGATGGGATGG/GGATGGGATGGGATGGGATGGGATGG	GGATGGGATGGGATGGGATGGGATGG/GGATGGGATGGGATGGGATGGGATGG	GGATGGGATGGGATGGGATGGGATGG/GGATGGGATGGGATGGGATGGGATGG	GGATGGGATGGGATGGGATGGGATGGGATGGGATGG/GGATGGGATGGGATGGGATGGGATGGGATGGGATGG	GGATGGGATGGGATGGGATGGGATGG/GGATGGGATGGGATGGGATGGGATGG	GGATGGGATGGGATGGGATGGGATGG/GGATGGGATGGGATGGGATGGGATGG	GGATGGGATGGGATGGGATGGGATGG/GGATGGGATGGGATGGGATGGGATGG	GGATGGGATGGGATGGGATGGGATGG/GGATGGGATGGGATGGGATGGGATGG
Xunr151	9	49753223	GCACATTTTCACATATACCAACCTAATCCTAAACCTCTTG	50.357	CAGAAGCTTATATAAGGTGTAGTTCAACTTATTCATCAGG	48.478	ATATATATATATATATAT	ATATATATATAT;ATATATATATATAT;ATATATATATATATAT	./.	ATATATATATAT/ATATATATATATAT	ATATATATATATATAT/ATATATATATATATATAT	./.	ATATATATATAT/ATATATATATATAT	ATATATATATATAT/ATATATATATATATAT	./.	./.	./.	./.	ATATATATATATATAT/ATATATATATATATATAT	ATATATATATATATATAT/ATATATATATATATATAT	ATATATATATATATAT/ATATATATATATATAT	ATATATATATATAT/ATATATATATATATAT	ATATATATATATAT/ATATATATATATATATAT	ATATATATATATAT/ATATATATATATAT	./.	./.	./.	./.	./.	./.	ATATATATATATAT/ATATATATATATATAT	ATATATATATATATAT/ATATATATATATATATAT	ATATATATATATATAT/ATATATATATATATATAT	ATATATATATATATAT/ATATATATATATATATAT	ATATATATATATAT/ATATATATATATATAT	./.	./.	ATATATATATATAT/ATATATATATATATAT	./.	./.	ATATATATATATATAT/ATATATATATATATAT	ATATATATATATATAT/ATATATATATATATATAT	./.	ATATATATATATATAT/ATATATATATATATATAT	./.	ATATATATATATATAT/ATATATATATATATAT	./.	./.	./.
Xunr152	9	51752782	GACACGGAAGGACTGGTTCCTTCGTCCAGTCCAGTACCAG	58.446	TCCCTGCTGTTTCCATTTAACGTCACGTCCATCCATCACG	57.19	TCTCTCTCTCTCTCTCTCTC	TCTCTCTCTCTCTCTC;TCTCTCTCTCTCTCTCT;TCTCTCTCTCTCTCTCTC;TCTCTCTCTCTCTCTCTCT;TCTCTCTCTCTCTCTCTCTCTC;TCTCTCTCTCTCTCTCTCTCTCTC;TCTCTCTCTCTCTCTCTCTCTCTCT;TCTCTCTCTCTCTCTCTCTCTCTCTC;TCTCTCTCTCTCTCTCTCTCTCTCTCT;TCTCTCTCTCTCTCTCTCTCTCTCTCTC;TCTCTCTCTCTCTCTCTCTCTCTCTCTCTC;TCTCTCTCTCTCTCTCTCTCTCTCTCTCTCTC;TCTCTCTCTCTCTCTCTCTCTCTCTCTCTCTCTC;TCTCTCTCTCTCTCTCTCTCTCTCTCTCTCTCTCTC;TCTCTCTCTCTCTCTCTCTCTCTCTCTCTCT…	TCTCTCTCTCTCTCTCTCTC/TCTCTCTCTCTCTCTCTCTCTC	TCTCTCTCTCTCTCTC/TCTCTCTCTCTCTCTC	TCTCTCTCTCTCTCTCTC/TCTCTCTCTCTCTCTCTCTC	TCTCTCTCTCTCTCTCTC/TCTCTCTCTCTCTCTCTCTC	TCTCTCTCTCTCTCTCTC/TCTCTCTCTCTCTCTCTCTC	TCTCTCTCTCTCTCTCTC/TCTCTCTCTCTCTCTCTCTC	TCTCTCTCTCTCTCTCTC/TCTCTCTCTCTCTCTCTCTC	TCTCTCTCTCTCTCTCTCTCTCTCTCTCTC/TCTCTCTCTCTCTCTCTCTCTCTCTCTCTCTCTCTC	TCTCTCTCTCTCTCTCTCTC/TCTCTCTCTCTCTCTCTCTCTC	TCTCTCTCTCTCTCTCTC/TCTCTCTCTCTCTCTCTCTC	TCTCTCTCTCTCTCTCTC/TCTCTCTCTCTCTCTCTCTC	TCTCTCTCTCTCTCTCTC/TCTCTCTCTCTCTCTCTCTC	TCTCTCTCTCTCTCTCTCTCTCTCTCTCTCTCTC/TCTCTCTCTCTCTCTCTCTCTCTCTCTCTCTCTCTCTC	TCTCTCTCTCTCTCTCTC/TCTCTCTCTCTCTCTCTCTC	TCTCTCTCTCTCTCTCTCTC/TCTCTCTCTCTCTCTCTCTCTC	TCTCTCTCTCTCTCTCTCTC/TCTCTCTCTCTCTCTCTCTC	TCTCTCTCTCTCTCTCTCTC/TCTCTCTCTCTCTCTCTCTCTC	TCTCTCTCTCTCTCTCTC/TCTCTCTCTCTCTCTCTCTC	TCTCTCTCTCTCTCTCTC/TCTCTCTCTCTCTCTCTC	TCTCTCTCTCTCTCTCTC/TCTCTCTCTCTCTCTCTCTC	TCTCTCTCTCTCTCTCTC/TCTCTCTCTCTCTCTCTCTC	TCTCTCTCTCTCTCTCTC/TCTCTCTCTCTCTCTCTCTC	TCTCTCTCTCTCTCTCTCTC/TCTCTCTCTCTCTCTCTCTC	TCTCTCTCTCTCTCTCTC/TCTCTCTCTCTCTCTCTCTCTC	TCTCTCTCTCTCTCTCTC/TCTCTCTCTCTCTCTCTCTC	TCTCTCTCTCTCTCTCTC/TCTCTCTCTCTCTCTCTCTC	TCTCTCTCTCTCTCTCTCTCTC/TCTCTCTCTCTCTCTCTCTCTCTC	TCTCTCTCTCTCTCTCTCTCTCTCTC/TCTCTCTCTCTCTCTCTCTCTCTCTCTC	TCTCTCTCTCTCTCTCTCTC/TCTCTCTCTCTCTCTCTCTC	TCTCTCTCTCTCTCTCTC/TCTCTCTCTCTCTCTCTCTC	TCTCTCTCTCTCTCTCTC/TCTCTCTCTCTCTCTCTCTC	TCTCTCTCTCTCTCTCTCTCTCTCTCTC/TCTCTCTCTCTCTCTCTCTCTCTCTCTCTCTCTC	TCTCTCTCTCTCTCTCTC/TCTCTCTCTCTCTCTCTCTC	TCTCTCTCTCTCTCTCTC/TCTCTCTCTCTCTCTCTCTC	TCTCTCTCTCTCTCTCTCTC/TCTCTCTCTCTCTCTCTCTC	TCTCTCTCTCTCTCTCTC/TCTCTCTCTCTCTCTCTCTCTC	TCTCTCTCTCTCTCTCTCTC/TCTCTCTCTCTCTCTCTCTCTC	TCTCTCTCTCTCTCTCTC/TCTCTCTCTCTCTCTCTCTC	TCTCTCTCTCTCTCTC/TCTCTCTCTCTCTCTCTCTCTC	TCTCTCTCTCTCTCTCTC/TCTCTCTCTCTCTCTCTCTC	TCTCTCTCTCTCTCTCTC/TCTCTCTCTCTCTCTCTCTC
Xunr153	9	53271616	ATTTCTAGTAGAAATTAAGCTAGAAACAAAATTACCTAGC	46.258	ACTCCAAACAACCGATGTGCTTCCAAAGCCATACACACAC	56.631	TATATATATATATATATATATATATATTTATATATA	TATATATATATATATA;TATATATATATATATATA;TATATATATATATATATATA;TATATATATATATATATATATA;TATATATATATATATATATATATA;TATATATATATATATATATATATATA;TATATATATATATATATATATATATATT;TATATATATATATATATATATATATATTTA	./.	./.	./.	./.	./.	./.	./.	./.	./.	./.	./.	./.	./.	./.	./.	TATATATATATATATA/TATATATATATATATA	./.	./.	./.	./.	./.	./.	./.	./.	./.	./.	./.	./.	TATATATATATATATATA/TATATATATATATATATA	./.	./.	./.	./.	./.	TATATATATATATATATA/TATATATATATATATATA	./.	./.	./.	./.	TATATATATATATATATA/TATATATATATATATATA	./.
Xunr154	9	53757251	TTTAATTTAACGATAAATCTTAAAATTTTTACAATGAAAG	42.462	CGAGGCTTCAGGTGACTAGCAGCTTTCGGCGAAGAGTCAC	59.456	TATTATTATTATTATTATTATTATT	TATTATTATTATTATTATT;TATTATTATTATTATTATTATT;TATTATTATTATTATTATTATTATTATT;TATTATTATTATTATTATTATTATTATTATT	./.	./.	./.	./.	./.	./.	TATTATTATTATTATTATTATT/TATTATTATTATTATTATTATT	./.	TATTATTATTATTATTATTATTATT/TATTATTATTATTATTATTATTATT	./.	./.	TATTATTATTATTATTATTATTATT/TATTATTATTATTATTATTATTATT	./.	TATTATTATTATTATTATTATTATT/TATTATTATTATTATTATTATTATT	./.	./.	TATTATTATTATTATTATTATTATT/TATTATTATTATTATTATTATTATT	TATTATTATTATTATTATTATTATT/TATTATTATTATTATTATTATTATT	./.	TATTATTATTATTATTATTATTATT/TATTATTATTATTATTATTATTATT	TATTATTATTATTATTATTATTATT/TATTATTATTATTATTATTATTATT	TATTATTATTATTATTATTATTATTATTATT/TATTATTATTATTATTATTATTATTATTATT	./.	./.	TATTATTATTATTATTATTATTATT/TATTATTATTATTATTATTATTATT	TATTATTATTATTATTATTATTATT/TATTATTATTATTATTATTATTATT	./.	./.	TATTATTATTATTATTATTATTATT/TATTATTATTATTATTATTATTATT	TATTATTATTATTATTATTATTATT/TATTATTATTATTATTATTATTATT	./.	./.	TATTATTATTATTATTATTATTATT/TATTATTATTATTATTATTATTATT	TATTATTATTATTATTATTATTATT/TATTATTATTATTATTATTATTATT	./.	TATTATTATTATTATTATTATTATT/TATTATTATTATTATTATTATTATT	./.	TATTATTATTATTATTATTATTATT/TATTATTATTATTATTATTATTATT	TATTATTATTATTATTATTATTATT/TATTATTATTATTATTATTATTATT	TATTATTATTATTATTATTATT/TATTATTATTATTATTATTATT	TATTATTATTATTATTATTATTATT/TATTATTATTATTATTATTATTATT
Xunr155	9	54079923	CCGAAAGGAGATCACTGGGACCGCGTCTAGGGGGCACAGG	61.951	GTGCTGGATGCGACGCGGATCGCAGCTGAGAGAGAGAGAT	61.176	ACACACACACACACACA	ACACACACA;ACACACACACA;ACACACACACACA;ACACACACACACACA;ACACACACACACACACACA;ACACACACACACACACACACA;ACACACACACACACACACACACA;ACACACACACACACACACACACACA	ACACACACA/ACACACACA	ACACACACACA/ACACACACACA	ACACACACACACACA/ACACACACACACACACA	ACACACACACACACA/ACACACACACACACACA	ACACACACACACACACACA/ACACACACACACACACACACA	ACACACACACACACA/ACACACACACACACACA	ACACACACACACACA/ACACACACACACACACA	ACACACACACACACACACACA/ACACACACACACACACACACACA	ACACACACACACA/ACACACACACACACA	ACACACACACACACACA/ACACACACACACACACACA	ACACACACACACACA/ACACACACACACACACA	ACACACACACACACA/ACACACACACACACACA	ACACACACACACACA/ACACACACACACACACA	ACACACACACACACA/ACACACACACACACACA	ACACACACACACACACA/ACACACACACACACACA	ACACACACACACACA/ACACACACACACACACA	ACACACACACACACA/ACACACACACACACACA	ACACACACACACACA/ACACACACACACACACA	ACACACACACACACA/ACACACACACACACACA	ACACACACACACACA/ACACACACACACACACA	ACACACACACACACA/ACACACACACACACACA	ACACACACACACACA/ACACACACACACACACA	ACACACACACACACACACACACA/ACACACACACACACACACACACACA	ACACACACACACACACACA/ACACACACACACACACACACA	ACACACACACACACA/ACACACACACACACACA	ACACACACACACACA/ACACACACACACACACA	ACACACACACACACACACACA/ACACACACACACACACACACA	ACACACACACACACA/ACACACACACACACACA	ACACACACACACA/ACACACACACACACA	ACACACACACACACA/ACACACACACACACACA	ACACACACACACACA/ACACACACACACACACA	ACACACACACACACACACA/ACACACACACACACACACA	ACACACACACACACA/ACACACACACACACACA	ACACACACACACACA/ACACACACACACACACA	ACACACACACACACA/ACACACACACACACACA	ACACACACACACACA/ACACACACACACACACA	ACACACACA/ACACACACA	ACACACACACACACACA/ACACACACACACACACA	ACACACACACACACA/ACACACACACACACACA	ACACACACACACACA/ACACACACACACACACA	ACACACACACACACA/ACACACACACACACACA
Xunr156	9	54480343	AAGCTACTCCGCCCCCCCTCCCTCCTACACACGGACACCC	63.245	ACCGTGTGAAGAGAGGGAGGAGAGAGAGTGTGTCTGTGTG	57.638	CTCTCTCTCTCTCTCTCTCTCTCT	CTCTCTCTCTCTCTCTCTCTCTCT;CTCTCTCTCTC;CTCTCTCTCTCT;CTCTCTCTCTCTC;CTCTCTCTCTCTCT;CTCTCTCTCTCTCTC;CTCTCTCTCTCTCTCT;CTCTCTCTCTCTCTCTCT;CTCTCTCTCTCTCTCTCTCT;CTCTCTCTCTCTCTCTCTCTCT;CTCTCTCTCTCTCTCTCTCTCTCTCT;CTCTCTCTCTCTCTCTCTCTCTCTCTCT;CTCTCTCTCTCTCTCTCTCTCTCTCTCTCT;CTCTCTCTCTCTCTCTCTCTCTCTCTCTCTCTCT	./.	CTCTCTCTCTCTCTCTCT/CTCTCTCTCTCTCTCTCTCT	CTCTCTCTCTCTCTCTCTCTCT/CTCTCTCTCTCTCTCTCTCTCTCT	CTCTCTCTCTCTCTCTCTCTCT/CTCTCTCTCTCTCTCTCTCTCT	CTCTCTCTCTCT/CTCTCTCTCTCT	CTCTCTCTCTCTCTCTCTCTCTCT/CTCTCTCTCTCTCTCTCTCTCTCTCT	CTCTCTCTCTCTCTCTCTCT/CTCTCTCTCTCTCTCTCTCTCT	CTCTCTCTCTCTCT/CTCTCTCTCTCTCTCTCTCTCTCT	CTCTCTCTCTCTCTCTCTCTCT/CTCTCTCTCTCTCTCTCTCTCTCT	CTCTCTCTCTCTCTCTCTCTCTCT/CTCTCTCTCTCTCTCTCTCTCTCTCTCT	CTCTCTCTCTCTCTCTCTCTCT/CTCTCTCTCTCTCTCTCTCTCTCT	CTCTCTCTCTCTCTCTCTCTCT/CTCTCTCTCTCTCTCTCTCTCTCT	CTCTCTCTCTCTCTCTCTCTCT/CTCTCTCTCTCTCTCTCTCTCTCT	CTCTCTCTCTCTCTCTCTCTCT/CTCTCTCTCTCTCTCTCTCTCTCT	CTCTCTCTCTCTCTCTCTCTCT/CTCTCTCTCTCTCTCTCTCTCTCT	CTCTCTCTCTCTCTCTCTCTCT/CTCTCTCTCTCTCTCTCTCTCTCT	CTCTCTCTCTCTCTCTCTCTCTCT/CTCTCTCTCTCTCTCTCTCTCTCTCT	CTCTCTCTCTCTCTCTCTCTCT/CTCTCTCTCTCTCTCTCTCTCTCT	CTCTCTCTCTCTCTCTCTCTCT/CTCTCTCTCTCTCTCTCTCTCTCT	CTCTCTCTCTCTCTCTCTCTCT/CTCTCTCTCTCTCTCTCTCTCTCT	CTCTCTCTCTCTCTCTCTCT/CTCTCTCTCTCTCTCTCTCTCT	CTCTCTCTCTCTCTCTCTCT/CTCTCTCTCTCTCTCTCTCTCT	CTCTCTCTCTCTCTCTCTCTCTCTCTCT/CTCTCTCTCTCTCTCTCTCTCTCTCTCTCT	CTCTCTCTCTCTCTCTCTCTCT/CTCTCTCTCTCTCTCTCTCTCTCT	CTCTCTCTCTCTCTCTCTCTCTCT/CTCTCTCTCTCTCTCTCTCTCTCTCT	CTCTCTCTCTCTCTCTCTCTCT/CTCTCTCTCTCTCTCTCTCTCTCT	CTCTCTCTCTCTCTCTCTCTCTCT/CTCTCTCTCTCTCTCTCTCTCTCT	CTCTCTCTCTCTCTCTCTCT/CTCTCTCTCTCTCTCTCTCTCTCTCTCTCTCTCT	CTCTCTCTCTCTCTCTCTCTCT/CTCTCTCTCTCTCTCTCTCTCTCT	CTCTCTCTCTCTCTCTCTCT/CTCTCTCTCTCTCTCTCTCTCT	CTCTCTCTCTCTCTCTCTCTCTCTCT/CTCTCTCTCTCTCTCTCTCTCTCTCTCT	CTCTCTCTCTCTCT/CTCTCTCTCTCTCT	CTCTCTCTCTCTCTCTCTCTCT/CTCTCTCTCTCTCTCTCTCTCTCT	CTCTCTCTCTCTCTCTCTCTCT/CTCTCTCTCTCTCTCTCTCTCTCT	CTCTCTCTCTCTCTCTCTCTCT/CTCTCTCTCTCTCTCTCTCTCTCT	CTCTCTCTCTCTCTCTCTCTCT/CTCTCTCTCTCTCTCTCTCTCTCT	./.	CTCTCTCTCTCTCTCTCTCTCT/CTCTCTCTCTCTCTCTCTCTCTCT	CTCTCTCTCTCTCTCTCTCTCT/CTCTCTCTCTCTCTCTCTCTCTCT	CTCTCTCTCTCTCTCTCTCT/CTCTCTCTCTCTCTCTCTCTCT	CTCTCTCTCTCTCTCTCTCTCT/CTCTCTCTCTCTCTCTCTCTCTCT
Xunr157	9	54947575	AAGGATCCAAAAGTGGGGGGAGGAGGCGGGCGCCCGCAGG	65.793	TCTCCGCTCGCTGCCTGCCTGCCTGCCCACGGGACGGAAC	67.156	GCGCGGCGCGGCGCGGCGCG	GCGCGGCG;GCGCGGCGCG;GCGCGGCGCGGCGC;GCGCGGCGCGGCGCG	GCGCGGCGCGGCGCG/GCGCGGCGCGGCGCG	GCGCGGCGCGGCGCGGCGCG/GCGCGGCGCGGCGCGGCGCG	GCGCGGCGCGGCGCGGCGCG/GCGCGGCGCGGCGCGGCGCG	./.	./.	GCGCGGCGCGGCGCGGCGCG/GCGCGGCGCGGCGCGGCGCG	./.	GCGCGGCGCGGCGCG/GCGCGGCGCGGCGCG	GCGCGGCGCGGCGCGGCGCG/GCGCGGCGCGGCGCGGCGCG	GCGCGGCGCGGCGCGGCGCG/GCGCGGCGCGGCGCGGCGCG	./.	GCGCGGCGCGGCGCGGCGCG/GCGCGGCGCGGCGCGGCGCG	GCGCGGCGCGGCGCGGCGCG/GCGCGGCGCGGCGCGGCGCG	GCGCGGCGCGGCGCGGCGCG/GCGCGGCGCGGCGCGGCGCG	GCGCGGCGCGGCGCGGCGCG/GCGCGGCGCGGCGCGGCGCG	GCGCGGCGCGGCGCGGCGCG/GCGCGGCGCGGCGCGGCGCG	GCGCGGCGCG/GCGCGGCGCGGCGCGGCGCG	GCGCGGCGCGGCGCGGCGCG/GCGCGGCGCGGCGCGGCGCG	GCGCGGCGCGGCGCGGCGCG/GCGCGGCGCGGCGCGGCGCG	GCGCGGCGCGGCGCGGCGCG/GCGCGGCGCGGCGCGGCGCG	GCGCGGCGCGGCGCGGCGCG/GCGCGGCGCGGCGCGGCGCG	GCGCGGCGCGGCGCGGCGCG/GCGCGGCGCGGCGCGGCGCG	./.	GCGCGGCGCGGCGCG/GCGCGGCGCGGCGCG	GCGCGGCGCGGCGCGGCGCG/GCGCGGCGCGGCGCGGCGCG	GCGCGGCGCGGCGCGGCGCG/GCGCGGCGCGGCGCGGCGCG	GCGCGGCGCGGCGCGGCGCG/GCGCGGCGCGGCGCGGCGCG	GCGCGGCGCGGCGCGGCGCG/GCGCGGCGCGGCGCGGCGCG	./.	GCGCGGCGCGGCGCGGCGCG/GCGCGGCGCGGCGCGGCGCG	GCGCGGCGCGGCGCGGCGCG/GCGCGGCGCGGCGCGGCGCG	GCGCGGCGCGGCGCG/GCGCGGCGCGGCGCG	GCGCGGCGCGGCGCGGCGCG/GCGCGGCGCGGCGCGGCGCG	./.	GCGCGGCGCGGCGCG/GCGCGGCGCGGCGCG	GCGCGGCGCGGCGCGGCGCG/GCGCGGCGCGGCGCGGCGCG	GCGCGGCGCG/GCGCGGCGCG	GCGCGGCGCGGCGCGGCGCG/GCGCGGCGCGGCGCGGCGCG	./.	GCGCGGCGCGGCGCGGCGCG/GCGCGGCGCGGCGCGGCGCG	GCGCGGCGCGGCGCGGCGCG/GCGCGGCGCGGCGCGGCGCG
Xunr158	9	56216700	GCGATGGCGCCGTACGCCTCGGACATGGCCTTGTCGCCGC	67.288	CTCTCGCTCAACACCACGCCTCCGCCGCCGGGTCATCATC	64.158	CCGCCGCCGCCGCCG	CCGCCGCCGCCGCCG;CCG;CCGCCGCCGCCG;CCGCCGCCGCCGCCGCCG;CCGCCGCCGCCGCCGCCGCCGCCGCCG	CCGCCGCCGCCGCCGCCGCCGCCGCCG/CCGCCGCCGCCGCCGCCGCCGCCGCCG	CCGCCGCCGCCGCCGCCG/CCGCCGCCGCCGCCGCCG	CCGCCGCCGCCGCCG/CCGCCGCCGCCGCCGCCG	CCGCCGCCGCCGCCG/CCGCCGCCGCCGCCG	CCGCCGCCGCCGCCG/CCGCCGCCGCCGCCG	CCGCCGCCGCCGCCG/CCGCCGCCGCCGCCG	CCGCCGCCGCCG/CCGCCGCCGCCGCCG	./.	CCGCCGCCGCCGCCG/CCGCCGCCGCCGCCG	CCGCCGCCGCCGCCG/CCGCCGCCGCCGCCG	CCGCCGCCGCCGCCG/CCGCCGCCGCCGCCG	CCGCCGCCGCCGCCG/CCGCCGCCGCCGCCG	CCGCCGCCGCCGCCG/CCGCCGCCGCCGCCG	CCGCCGCCGCCGCCG/CCGCCGCCGCCGCCG	CCGCCGCCGCCGCCG/CCGCCGCCGCCGCCG	CCGCCGCCGCCGCCG/CCGCCGCCGCCGCCG	CCGCCGCCGCCGCCG/CCGCCGCCGCCGCCG	CCGCCGCCGCCGCCG/CCGCCGCCGCCGCCG	CCGCCGCCGCCGCCG/CCGCCGCCGCCGCCGCCG	CCGCCGCCGCCGCCG/CCGCCGCCGCCGCCG	CCGCCGCCGCCGCCG/CCGCCGCCGCCGCCG	CCGCCGCCGCCGCCG/CCGCCGCCGCCGCCG	CCGCCGCCGCCGCCG/CCGCCGCCGCCGCCG	CCGCCGCCGCCGCCG/CCGCCGCCGCCGCCG	CCGCCGCCGCCGCCG/CCGCCGCCGCCGCCG	CCGCCGCCGCCGCCG/CCGCCGCCGCCGCCGCCG	./.	CCGCCGCCGCCGCCG/CCGCCGCCGCCGCCGCCG	CCG/CCGCCGCCGCCGCCG	CCGCCGCCGCCGCCGCCG/CCGCCGCCGCCGCCGCCG	CCGCCGCCGCCGCCG/CCGCCGCCGCCGCCG	CCGCCGCCGCCGCCG/CCGCCGCCGCCGCCG	CCGCCGCCGCCGCCG/CCGCCGCCGCCGCCG	CCGCCGCCGCCGCCGCCG/CCGCCGCCGCCGCCGCCG	CCGCCGCCGCCGCCG/CCGCCGCCGCCGCCG	CCGCCGCCGCCGCCG/CCGCCGCCGCCGCCGCCG	CCGCCGCCGCCGCCG/CCGCCGCCGCCGCCG	CCGCCGCCGCCGCCG/CCGCCGCCGCCGCCGCCG	CCGCCGCCGCCGCCGCCG/CCGCCGCCGCCGCCGCCG	CCGCCGCCGCCGCCG/CCGCCGCCGCCGCCG	CCGCCGCCGCCG/CCGCCGCCGCCGCCG
Xunr159	9	57127220	CCTCTCCTCTCCTCTCCTGGACCCCCGCTCGGCCTCAACG	63.444	CTCCCTCCCCTCCGCTCCAGCTCCAGCTCCCCTCCATCCT	63.945	CGGATCGGATCGGATCGGAGCGGA	CGGATCGGATCGGA;CGGATCGGATCGGATCGGA;CGGATCGGATCGGATCGGAGCGGATCGGA;CGGATCGGATCGGATCGGAGCGGATCGGATCGGA	CGGATCGGATCGGATCGGAGCGGA/CGGATCGGATCGGATCGGAGCGGA	CGGATCGGATCGGATCGGAGCGGA/CGGATCGGATCGGATCGGAGCGGA	CGGATCGGATCGGATCGGAGCGGA/CGGATCGGATCGGATCGGAGCGGA	CGGATCGGATCGGATCGGAGCGGATCGGA/CGGATCGGATCGGATCGGAGCGGATCGGA	CGGATCGGATCGGA/CGGATCGGATCGGA	CGGATCGGATCGGA/CGGATCGGATCGGA	CGGATCGGATCGGATCGGAGCGGA/CGGATCGGATCGGATCGGAGCGGA	./.	CGGATCGGATCGGATCGGAGCGGA/CGGATCGGATCGGATCGGAGCGGA	CGGATCGGATCGGATCGGAGCGGA/CGGATCGGATCGGATCGGAGCGGA	CGGATCGGATCGGATCGGAGCGGA/CGGATCGGATCGGATCGGAGCGGA	CGGATCGGATCGGATCGGAGCGGA/CGGATCGGATCGGATCGGAGCGGA	CGGATCGGATCGGATCGGAGCGGA/CGGATCGGATCGGATCGGAGCGGA	CGGATCGGATCGGATCGGAGCGGA/CGGATCGGATCGGATCGGAGCGGA	CGGATCGGATCGGATCGGAGCGGA/CGGATCGGATCGGATCGGAGCGGA	CGGATCGGATCGGA/CGGATCGGATCGGATCGGAGCGGA	CGGATCGGATCGGATCGGAGCGGA/CGGATCGGATCGGATCGGAGCGGA	CGGATCGGATCGGATCGGAGCGGA/CGGATCGGATCGGATCGGAGCGGA	CGGATCGGATCGGATCGGAGCGGA/CGGATCGGATCGGATCGGAGCGGA	CGGATCGGATCGGATCGGAGCGGA/CGGATCGGATCGGATCGGAGCGGA	CGGATCGGATCGGATCGGAGCGGA/CGGATCGGATCGGATCGGAGCGGA	CGGATCGGATCGGATCGGAGCGGA/CGGATCGGATCGGATCGGAGCGGA	CGGATCGGATCGGATCGGAGCGGA/CGGATCGGATCGGATCGGAGCGGA	CGGATCGGATCGGATCGGAGCGGA/CGGATCGGATCGGATCGGAGCGGA	CGGATCGGATCGGATCGGA/CGGATCGGATCGGATCGGAGCGGA	CGGATCGGATCGGATCGGAGCGGA/CGGATCGGATCGGATCGGAGCGGA	CGGATCGGATCGGA/CGGATCGGATCGGATCGGAGCGGA	CGGATCGGATCGGATCGGAGCGGA/CGGATCGGATCGGATCGGAGCGGA	CGGATCGGATCGGATCGGAGCGGA/CGGATCGGATCGGATCGGAGCGGA	CGGATCGGATCGGATCGGAGCGGA/CGGATCGGATCGGATCGGAGCGGA	CGGATCGGATCGGATCGGAGCGGA/CGGATCGGATCGGATCGGAGCGGA	CGGATCGGATCGGA/CGGATCGGATCGGA	CGGATCGGATCGGATCGGAGCGGA/CGGATCGGATCGGATCGGAGCGGA	CGGATCGGATCGGATCGGAGCGGATCGGATCGGA/CGGATCGGATCGGATCGGAGCGGATCGGATCGGA	CGGATCGGATCGGATCGGAGCGGA/CGGATCGGATCGGATCGGAGCGGA	CGGATCGGATCGGATCGGAGCGGA/CGGATCGGATCGGATCGGAGCGGA	CGGATCGGATCGGA/CGGATCGGATCGGA	CGGATCGGATCGGATCGGAGCGGATCGGATCGGA/CGGATCGGATCGGATCGGAGCGGATCGGATCGGA	./.	CGGATCGGATCGGATCGGA/CGGATCGGATCGGATCGGAGCGGA	CGGATCGGATCGGATCGGAGCGGA/CGGATCGGATCGGATCGGAGCGGA
Xunr160	9	57489655	GCGGCGGCGGCGTAGGACGGAAGCGGGGACGGGTTGTTGC	68.228	AGAAGAAACGGAGCACAAGAGCCAAAACCCCCTCCTCGTC	58.99	GAGAGGGAGAGGGAGAGGG	GAGAGGGAGAGGGAGAGGG;GAGAGGGAGAGGGAGAGGGAGAGGG;GAGAGGGAGAGGGAGAGGGAGAGGGAGAGGG	GAGAGGGAGAGGGAGAGGGAGAGGGAGAGGG/GAGAGGGAGAGGGAGAGGGAGAGGGAGAGGG	GAGAGGGAGAGGGAGAGGGAGAGGG/GAGAGGGAGAGGGAGAGGGAGAGGG	GAGAGGGAGAGGGAGAGGG/GAGAGGGAGAGGGAGAGGG	GAGAGGGAGAGGGAGAGGG/GAGAGGGAGAGGGAGAGGG	GAGAGGGAGAGGGAGAGGG/GAGAGGGAGAGGGAGAGGG	GAGAGGGAGAGGGAGAGGGAGAGGG/GAGAGGGAGAGGGAGAGGGAGAGGG	GAGAGGGAGAGGGAGAGGG/GAGAGGGAGAGGGAGAGGG	GAGAGGGAGAGGGAGAGGGAGAGGG/GAGAGGGAGAGGGAGAGGGAGAGGG	GAGAGGGAGAGGGAGAGGG/GAGAGGGAGAGGGAGAGGG	GAGAGGGAGAGGGAGAGGG/GAGAGGGAGAGGGAGAGGG	GAGAGGGAGAGGGAGAGGG/GAGAGGGAGAGGGAGAGGG	GAGAGGGAGAGGGAGAGGG/GAGAGGGAGAGGGAGAGGG	GAGAGGGAGAGGGAGAGGG/GAGAGGGAGAGGGAGAGGG	GAGAGGGAGAGGGAGAGGG/GAGAGGGAGAGGGAGAGGG	GAGAGGGAGAGGGAGAGGG/GAGAGGGAGAGGGAGAGGG	GAGAGGGAGAGGGAGAGGG/GAGAGGGAGAGGGAGAGGG	GAGAGGGAGAGGGAGAGGG/GAGAGGGAGAGGGAGAGGG	GAGAGGGAGAGGGAGAGGG/GAGAGGGAGAGGGAGAGGG	GAGAGGGAGAGGGAGAGGG/GAGAGGGAGAGGGAGAGGG	GAGAGGGAGAGGGAGAGGG/GAGAGGGAGAGGGAGAGGG	GAGAGGGAGAGGGAGAGGG/GAGAGGGAGAGGGAGAGGG	GAGAGGGAGAGGGAGAGGG/GAGAGGGAGAGGGAGAGGG	GAGAGGGAGAGGGAGAGGG/GAGAGGGAGAGGGAGAGGG	GAGAGGGAGAGGGAGAGGG/GAGAGGGAGAGGGAGAGGG	GAGAGGGAGAGGGAGAGGG/GAGAGGGAGAGGGAGAGGG	GAGAGGGAGAGGGAGAGGG/GAGAGGGAGAGGGAGAGGG	GAGAGGGAGAGGGAGAGGG/GAGAGGGAGAGGGAGAGGG	GAGAGGGAGAGGGAGAGGG/GAGAGGGAGAGGGAGAGGG	GAGAGGGAGAGGGAGAGGG/GAGAGGGAGAGGGAGAGGG	GAGAGGGAGAGGGAGAGGGAGAGGG/GAGAGGGAGAGGGAGAGGGAGAGGG	GAGAGGGAGAGGGAGAGGG/GAGAGGGAGAGGGAGAGGG	GAGAGGGAGAGGGAGAGGGAGAGGG/GAGAGGGAGAGGGAGAGGGAGAGGG	GAGAGGGAGAGGGAGAGGG/GAGAGGGAGAGGGAGAGGG	GAGAGGGAGAGGGAGAGGG/GAGAGGGAGAGGGAGAGGG	GAGAGGGAGAGGGAGAGGG/GAGAGGGAGAGGGAGAGGG	GAGAGGGAGAGGGAGAGGG/GAGAGGGAGAGGGAGAGGG	GAGAGGGAGAGGGAGAGGGAGAGGGAGAGGG/GAGAGGGAGAGGGAGAGGGAGAGGGAGAGGG	GAGAGGGAGAGGGAGAGGG/GAGAGGGAGAGGGAGAGGG	GAGAGGGAGAGGGAGAGGG/GAGAGGGAGAGGGAGAGGG	GAGAGGGAGAGGGAGAGGG/GAGAGGGAGAGGGAGAGGG	GAGAGGGAGAGGGAGAGGG/GAGAGGGAGAGGGAGAGGG
Xunr161	9	58316569	TGCACGTGTGGGCTTCGTGTAAACCCAAACGAATGGACTG	59.01	GGTGGGGATTAAATTGGGTCAGCGAGCTTGGTTGCCTGGA	59.329	CATCGTCATCGTCATCGTCATCGTC	CATCGTCATCGTCATCGTCATCG;CATCGTCATCGTCATCGTCATCGTCATCG;CATCGTCATCGTCATCGTCATCGTCATCGT;CATCGTCATCGTCATCGTCATCGTCATCGTCATCG;CATCGTCATCGTCATCGTCATCGTCATCGTCATCGTCATCGTCATCG	CATCGTCATCGTCATCGTCATCGTCATCGTCATCG/CATCGTCATCGTCATCGTCATCGTCATCGTCATCG	./.	CATCGTCATCGTCATCGTCATCGTC/CATCGTCATCGTCATCGTCATCGTC	CATCGTCATCGTCATCGTCATCG/CATCGTCATCGTCATCGTCATCG	./.	CATCGTCATCGTCATCGTCATCGTC/CATCGTCATCGTCATCGTCATCGTC	CATCGTCATCGTCATCGTCATCGTCATCGTCATCGTCATCGTCATCG/CATCGTCATCGTCATCGTCATCGTCATCGTCATCGTCATCGTCATCG	CATCGTCATCGTCATCGTCATCG/CATCGTCATCGTCATCGTCATCG	./.	./.	CATCGTCATCGTCATCGTCATCGTC/CATCGTCATCGTCATCGTCATCGTC	CATCGTCATCGTCATCGTCATCG/CATCGTCATCGTCATCGTCATCG	CATCGTCATCGTCATCGTCATCGTC/CATCGTCATCGTCATCGTCATCGTC	CATCGTCATCGTCATCGTCATCG/CATCGTCATCGTCATCGTCATCG	CATCGTCATCGTCATCGTCATCGTC/CATCGTCATCGTCATCGTCATCGTC	./.	CATCGTCATCGTCATCGTCATCGTC/CATCGTCATCGTCATCGTCATCGTC	CATCGTCATCGTCATCGTCATCGTC/CATCGTCATCGTCATCGTCATCGTC	./.	CATCGTCATCGTCATCGTCATCGTC/CATCGTCATCGTCATCGTCATCGTC	CATCGTCATCGTCATCGTCATCGTC/CATCGTCATCGTCATCGTCATCGTC	CATCGTCATCGTCATCGTCATCGTC/CATCGTCATCGTCATCGTCATCGTC	CATCGTCATCGTCATCGTCATCG/CATCGTCATCGTCATCGTCATCG	CATCGTCATCGTCATCGTCATCGTC/CATCGTCATCGTCATCGTCATCGTC	CATCGTCATCGTCATCGTCATCGTC/CATCGTCATCGTCATCGTCATCGTC	CATCGTCATCGTCATCGTCATCGTC/CATCGTCATCGTCATCGTCATCGTC	./.	CATCGTCATCGTCATCGTCATCG/CATCGTCATCGTCATCGTCATCG	CATCGTCATCGTCATCGTCATCGTC/CATCGTCATCGTCATCGTCATCGTC	CATCGTCATCGTCATCGTCATCG/CATCGTCATCGTCATCGTCATCG	CATCGTCATCGTCATCGTCATCGTC/CATCGTCATCGTCATCGTCATCGTC	CATCGTCATCGTCATCGTCATCG/CATCGTCATCGTCATCGTCATCG	./.	CATCGTCATCGTCATCGTCATCGTC/CATCGTCATCGTCATCGTCATCGTC	./.	CATCGTCATCGTCATCGTCATCGTCATCG/CATCGTCATCGTCATCGTCATCGTCATCG	CATCGTCATCGTCATCGTCATCGTCATCGTCATCG/CATCGTCATCGTCATCGTCATCGTCATCGTCATCG	CATCGTCATCGTCATCGTCATCGTC/CATCGTCATCGTCATCGTCATCGTC	./.	CATCGTCATCGTCATCGTCATCGTCATCGTCATCG/CATCGTCATCGTCATCGTCATCGTCATCGTCATCG	./.
Xunr162	10	1146933	AACATGTTAATGCCTATTTGATCACGTACTTAGCCCATTC	51.449	GACGGGGGCTCTGATCTCTAGAACTAGAACGGACGGAGAG	57.588	AATTAATTAATTAATTAATTAATTAATTA	AATTAATTAATTA;AATTAATTAATTAATTA;AATTAATTAATTAATTAATTA;AATTAATTAATTAATTAATTAAT;AATTAATTAATTAATTAATTAATTA;AATTAATTAATTAATTAATTAATTAATTAATTA;AATTAATTAATTAATTAATTAATTAATTAATTAATTAATTAATTAATTAATTAATTAATTAATTA;AATTAATTAATTAATTAATTAATTAATTAATTAATTAATTAATTAATTAATTAATTAATTAATTAATT	AATTAATTAATTAATTA/AATTAATTAATTAATTA	AATTAATTAATTAATTAATTAATTAATTAATTA/AATTAATTAATTAATTAATTAATTAATTAATTA	AATTAATTAATTAATTAATTAATTAATTA/AATTAATTAATTAATTAATTAATTAATTA	./.	AATTAATTAATTAATTAATTAATTAATTA/AATTAATTAATTAATTAATTAATTAATTA	AATTAATTAATTAATTAATTAATTAATTA/AATTAATTAATTAATTAATTAATTAATTA	AATTAATTAATTAATTAATTAATTAATTA/AATTAATTAATTAATTAATTAATTAATTA	./.	AATTAATTAATTAATTAATTA/AATTAATTAATTAATTAATTA	AATTAATTAATTAATTAATTAATTA/AATTAATTAATTAATTAATTAATTA	AATTAATTAATTAATTAATTAATTA/AATTAATTAATTAATTAATTAATTA	AATTAATTAATTAATTAATTAATTAATTAATTA/AATTAATTAATTAATTAATTAATTAATTAATTA	./.	AATTAATTAATTAATTAATTAATTAATTA/AATTAATTAATTAATTAATTAATTAATTA	AATTAATTAATTAATTAATTAATTAATTA/AATTAATTAATTAATTAATTAATTAATTA	AATTAATTAATTAATTAATTA/AATTAATTAATTAATTAATTA	AATTAATTAATTAATTAATTAATTAATTAATTA/AATTAATTAATTAATTAATTAATTAATTAATTA	./.	./.	./.	AATTAATTAATTAATTAATTAATTAATTA/AATTAATTAATTAATTAATTAATTAATTA	./.	AATTAATTAATTAATTAATTAATTAATTA/AATTAATTAATTAATTAATTAATTAATTA	AATTAATTAATTAATTAATTA/AATTAATTAATTAATTAATTA	./.	AATTAATTAATTAATTAATTAATTA/AATTAATTAATTAATTAATTAATTA	./.	AATTAATTAATTAATTAATTAATTA/AATTAATTAATTAATTAATTAATTA	./.	AATTAATTAATTAATTAATTAATTAATTAATTA/AATTAATTAATTAATTAATTAATTAATTAATTA	AATTAATTAATTAATTAATTAAT/AATTAATTAATTAATTAATTAAT	./.	AATTAATTAATTAATTAATTAATTAATTAATTA/AATTAATTAATTAATTAATTAATTAATTAATTA	AATTAATTAATTAATTAATTAATTAATTA/AATTAATTAATTAATTAATTAATTAATTA	AATTAATTAATTAATTAATTAATTAATTA/AATTAATTAATTAATTAATTAATTAATTA	AATTAATTAATTAATTAATTAATTAATTA/AATTAATTAATTAATTAATTAATTAATTA	AATTAATTAATTAATTAATTA/AATTAATTAATTAATTAATTA	AATTAATTAATTAATTAATTA/AATTAATTAATTAATTAATTA	AATTAATTAATTAATTAATTAATTAATTA/AATTAATTAATTAATTAATTAATTAATTA	AATTAATTAATTAATTAATTAATTAATTA/AATTAATTAATTAATTAATTAATTAATTA	./.
Xunr163	10	1749074	TTTGTTGGTGGTGGAGGTGCCTCTCCCGTCCTCCCCCTTC	61.636	ACAGTGGGGGAAGTGCCTGACTGGTGAAGAAGAGTTCTGG	58.313	GGCTGGCTGGCTGGCTGGCTGGC	GGCTGGCTGGC;GGCTGGCTGGCTGGC;GGCTGGCTGGCTGGCTGG;GGCTGGCTGGCTGGCTGGC;GGCTGGCTGGCTGGCTGGCTGG;GGCTGGCTGGCTGGCTGGCTGGCTG;GGCTGGCTGGCTGGCTGGCTGGCTGG;GGCTGGCTGGCTGGCTGGCTGGCTGGCTGG;GGCTGGCTGGCTGGCTGGCTGGCTGGCTGGC;GGCTGGCTGGCTGGCTGGCTGGCTGGCTGGCTGG;GGCTGGCTGGCTGGCTGGCTGGCTGGCTGGCTGGCTGGCTGGCTGGCTGGCTGGCTGGCTGGCTGGC	GGCTGGCTGGC/GGCTGGCTGGC	GGCTGGCTGGCTGGCTGGCTGGCTGG/GGCTGGCTGGCTGGCTGGCTGGCTGG	GGCTGGCTGGCTGGCTGGCTGGC/GGCTGGCTGGCTGGCTGGCTGGC	GGCTGGCTGGCTGGCTGGCTGGC/GGCTGGCTGGCTGGCTGGCTGGC	GGCTGGCTGGC/GGCTGGCTGGC	GGCTGGCTGGCTGGC/GGCTGGCTGGCTGGC	GGCTGGCTGGCTGGCTGGCTGGCTGG/GGCTGGCTGGCTGGCTGGCTGGCTGG	GGCTGGCTGGCTGGCTGGC/GGCTGGCTGGCTGGCTGGC	GGCTGGCTGGCTGGCTGGCTGGC/GGCTGGCTGGCTGGCTGGCTGGC	GGCTGGCTGGC/GGCTGGCTGGC	GGCTGGCTGGC/GGCTGGCTGGC	GGCTGGCTGGCTGGCTGGCTGGC/GGCTGGCTGGCTGGCTGGCTGGC	GGCTGGCTGGCTGGCTGGC/GGCTGGCTGGCTGGCTGGC	GGCTGGCTGGCTGGCTGGCTGGC/GGCTGGCTGGCTGGCTGGCTGGC	GGCTGGCTGGC/GGCTGGCTGGC	GGCTGGCTGGCTGGCTGGCTGGC/GGCTGGCTGGCTGGCTGGCTGGC	GGCTGGCTGGCTGGCTGGCTGGC/GGCTGGCTGGCTGGCTGGCTGGC	GGCTGGCTGGCTGGCTGGCTGGC/GGCTGGCTGGCTGGCTGGCTGGC	GGCTGGCTGGC/GGCTGGCTGGC	GGCTGGCTGGCTGGCTGGC/GGCTGGCTGGCTGGCTGGC	GGCTGGCTGGCTGGCTGGCTGGC/GGCTGGCTGGCTGGCTGGCTGGC	GGCTGGCTGGCTGGCTGGCTGGC/GGCTGGCTGGCTGGCTGGCTGGC	GGCTGGCTGGC/GGCTGGCTGGC	GGCTGGCTGGCTGGCTGGCTGGC/GGCTGGCTGGCTGGCTGGCTGGC	GGCTGGCTGGCTGGCTGGCTGGC/GGCTGGCTGGCTGGCTGGCTGGC	GGCTGGCTGGCTGGCTGGCTGGC/GGCTGGCTGGCTGGCTGGCTGGC	GGCTGGCTGGC/GGCTGGCTGGC	GGCTGGCTGGCTGGCTGGCTGGC/GGCTGGCTGGCTGGCTGGCTGGC	GGCTGGCTGGCTGGCTGGCTGGC/GGCTGGCTGGCTGGCTGGCTGGC	GGCTGGCTGGCTGGCTGGCTGGC/GGCTGGCTGGCTGGCTGGCTGGC	GGCTGGCTGGCTGGCTGGCTGGC/GGCTGGCTGGCTGGCTGGCTGGC	GGCTGGCTGGCTGGCTGGC/GGCTGGCTGGCTGGCTGGC	GGCTGGCTGGCTGGCTGGCTGGC/GGCTGGCTGGCTGGCTGGCTGGC	GGCTGGCTGGCTGGCTGGCTGGC/GGCTGGCTGGCTGGCTGGCTGGC	GGCTGGCTGGCTGGCTGGCTGGC/GGCTGGCTGGCTGGCTGGCTGGC	GGCTGGCTGGCTGGCTGGCTGGC/GGCTGGCTGGCTGGCTGGCTGGC	GGCTGGCTGGCTGGCTGGCTGGCTGGCTGG/GGCTGGCTGGCTGGCTGGCTGGCTGGCTGG	GGCTGGCTGGCTGGCTGGCTGGC/GGCTGGCTGGCTGGCTGGCTGGC	GGCTGGCTGGCTGGCTGGCTGGCTGG/GGCTGGCTGGCTGGCTGGCTGGCTGG	GGCTGGCTGGCTGGCTGGCTGGCTGG/GGCTGGCTGGCTGGCTGGCTGGCTGG	GGCTGGCTGGCTGGCTGGCTGGC/GGCTGGCTGGCTGGCTGGCTGGC
Xunr164	10	2451093	ATTATTGGGATCGGATCGGATCGGATCAGATGGCGATGAG	56.128	TCGTTGTTTAGTTGGGACACCACACAGCATCAGCCAGACC	58.239	ATGGATGGATGGATGGATGGATGGATGGAT	ATGGATGGAT;ATGGATGGATGGAT;ATGGATGGATGGATGGAT;ATGGATGGATGGATGGATGGAT;ATGGATGGATGGATGGATGGATGGAT;ATGGATGGATGGATGGATGGATGGATG;ATGGATGGATGGATGGATGGATGGATGGATGGAT;ATGGATGGATGGATGGATGGATGGATGGATGGATGGA;ATGGATGGATGGATGGATGGATGGATGGATGGATGGAT;ATGGATGGATGGATGGATGGATGGATGGATGGATGGATGGAT;ATGGATGGATGGATGGATGGATGGATGGATGGATGGATGGATGGA;ATGGATGGATGGATGGATGGATGGATGGATGGATGGATGGATGGAT;ATGGATGGATGGATGGATGGATGGATGG…	ATGGATGGATGGATGGATGGATGGATGGAT/ATGGATGGATGGATGGATGGATGGATGGAT	ATGGATGGATGGAT/ATGGATGGATGGATGGATGGATGGATGGAT	ATGGATGGATGGATGGATGGATGGATGGATGGATGGAT/ATGGATGGATGGATGGATGGATGGATGGATGGATGGATGGAT	ATGGATGGAT/ATGGATGGATGGATGGATGGATGGATGGATGGATGGATGGAT	ATGGATGGATGGATGGATGGATGGAT/ATGGATGGATGGATGGATGGATGGAT	ATGGATGGATGGATGGATGGATGGAT/ATGGATGGATGGATGGATGGATGGAT	ATGGATGGATGGATGGATGGATGGATGGAT/ATGGATGGATGGATGGATGGATGGATGGAT	ATGGATGGATGGATGGATGGATGGATGGAT/ATGGATGGATGGATGGATGGATGGATGGAT	ATGGATGGATGGATGGATGGATGGATGGATGGAT/ATGGATGGATGGATGGATGGATGGATGGATGGATGGAT	ATGGATGGATGGATGGATGGATGGATGGATGGATGGAT/ATGGATGGATGGATGGATGGATGGATGGATGGATGGAT	ATGGATGGATGGATGGATGGATGGATGGATGGAT/ATGGATGGATGGATGGATGGATGGATGGATGGAT	ATGGATGGATGGATGGATGGATGGATGGATGGAT/ATGGATGGATGGATGGATGGATGGATGGATGGATGGA	ATGGATGGATGGATGGATGGATGGATGGATGGATGGAT/ATGGATGGATGGATGGATGGATGGATGGATGGATGGAT	ATGGATGGAT/ATGGATGGATGGATGGATGGATGGATGGATGGATGGAT	ATGGATGGATGGATGGATGGATGGATGGATGGATGGAT/ATGGATGGATGGATGGATGGATGGATGGATGGATGGAT	ATGGATGGATGGAT/ATGGATGGATGGATGGATGGATGGATGGATGGATGGATGGAT	ATGGATGGATGGATGGATGGATGGATGGATGGAT/ATGGATGGATGGATGGATGGATGGATGGATGGATGGATGGATGGAT	ATGGATGGATGGATGGATGGATGGATGGATGGATGGAT/ATGGATGGATGGATGGATGGATGGATGGATGGATGGAT	ATGGATGGATGGATGGATGGAT/ATGGATGGATGGATGGATGGATGGATGGATGGATGGAT	ATGGATGGATGGATGGATGGATGGATGGATGGAT/ATGGATGGATGGATGGATGGATGGATGGATGGAT	ATGGATGGATGGATGGATGGATGGATGGAT/ATGGATGGATGGATGGATGGATGGATGGAT	ATGGATGGATGGATGGATGGATGGATGGAT/ATGGATGGATGGATGGATGGATGGATGGAT	ATGGATGGATGGATGGATGGATGGAT/ATGGATGGATGGATGGATGGATGGAT	ATGGATGGATGGATGGATGGATGGATGGATGGAT/ATGGATGGATGGATGGATGGATGGATGGATGGATGGATGGATGGATGGATGGATGGAT	ATGGATGGATGGATGGATGGATGGATGGAT/ATGGATGGATGGATGGATGGATGGATGGAT	ATGGATGGATGGATGGATGGATGGATGGATGGATGGAT/ATGGATGGATGGATGGATGGATGGATGGATGGATGGAT	ATGGATGGATGGATGGATGGATGGATGGATGGATGGATGGAT/ATGGATGGATGGATGGATGGATGGATGGATGGATGGATGGAT	ATGGATGGATGGATGGATGGATGGATGGATGGATGGAT/ATGGATGGATGGATGGATGGATGGATGGATGGATGGAT	ATGGATGGATGGATGGATGGATGGATGGAT/ATGGATGGATGGATGGATGGATGGATGGATGGATGGAT	ATGGATGGATGGATGGATGGAT/ATGGATGGATGGATGGATGGATGGATGGATGGATGGATGGATGGAT	ATGGATGGATGGATGGATGGATGGATGGATGGATGGAT/ATGGATGGATGGATGGATGGATGGATGGATGGATGGAT	ATGGATGGATGGATGGATGGATGGATGGAT/ATGGATGGATGGATGGATGGATGGATGGAT	ATGGATGGATGGATGGATGGATGGATGGATGGAT/ATGGATGGATGGATGGATGGATGGATGGATGGAT	ATGGATGGATGGATGGATGGATGGATGGAT/ATGGATGGATGGATGGATGGATGGATGGAT	ATGGATGGATGGATGGATGGATGGATGGATGGAT/ATGGATGGATGGATGGATGGATGGATGGATGGAT	ATGGATGGATGGATGGATGGATGGATGGATGGATGGAT/ATGGATGGATGGATGGATGGATGGATGGATGGATGGAT	ATGGATGGATGGATGGATGGATGGATGGATGGAT/ATGGATGGATGGATGGATGGATGGATGGATGGAT	ATGGATGGATGGATGGATGGATGGAT/ATGGATGGATGGATGGATGGATGGAT	ATGGATGGATGGATGGATGGATGGATGGATGGATGGAT/ATGGATGGATGGATGGATGGATGGATGGATGGATGGAT	ATGGATGGATGGATGGATGGATGGATGGATGGAT/ATGGATGGATGGATGGATGGATGGATGGATGGATGGATGGAT	ATGGATGGATGGATGGATGGATGGATGGATGGAT/ATGGATGGATGGATGGATGGATGGATGGATGGAT
Xunr165	10	2634235	ATCCTAATGTTCTCCTTCTTCTAGTGGAACATCCCTACTC	51.537	CGTAAAAGCGTATATACTCCACTGGAGAGTATTTACCGTG	51.941	ATATATATATATATATAT	ATATATATATAT;ATATATATATATAT;ATATATATATATATAT	./.	./.	./.	./.	./.	ATATATATATATATAT/ATATATATATATATAT	./.	./.	./.	./.	./.	./.	./.	./.	./.	./.	./.	ATATATATATATATATAT/ATATATATATATATATAT	./.	./.	./.	./.	./.	./.	ATATATATATATATATAT/ATATATATATATATATAT	./.	./.	./.	ATATATATATATAT/ATATATATATATAT	./.	./.	ATATATATATATATAT/ATATATATATATATAT	./.	./.	./.	./.	./.	./.	./.	./.	./.
Xgma6	10	4107816	GCCGGTGGTGGAGCGGTTGCGGCGGCGGCAGGGCACGGCC	71.947	CCACCCACTTGCCCCACTTGCGCATCCGAACGCCGCGATA	64.549	GAGGTGGAGGAGGAGGAGGAGGAGG	GAGGTGGAGGAGGAGG;GAGGTGGAGGAGGAGGAGGAGG;GAGGTGGAGGAGGAGGAGGAGGAG;GAGGTGGAGGAGGAGGAGGAGGAGGA;GAGGTGGAGGAGGAGGAGGAGGAGGAGG;GAGGTGGAGGAGGAGGAGGAGGAGGAGGAGG	GAGGTGGAGGAGGAGGAGGAGGAGG/GAGGTGGAGGAGGAGGAGGAGGAGG	GAGGTGGAGGAGGAGGAGGAGG/GAGGTGGAGGAGGAGGAGGAGGAGG	GAGGTGGAGGAGGAGGAGGAGGAGG/GAGGTGGAGGAGGAGGAGGAGGAGG	GAGGTGGAGGAGGAGGAGGAGGAGG/GAGGTGGAGGAGGAGGAGGAGGAGG	GAGGTGGAGGAGGAGGAGGAGGAGG/GAGGTGGAGGAGGAGGAGGAGGAGG	GAGGTGGAGGAGGAGGAGGAGGAGG/GAGGTGGAGGAGGAGGAGGAGGAGG	GAGGTGGAGGAGGAGGAGGAGGAGG/GAGGTGGAGGAGGAGGAGGAGGAGG	GAGGTGGAGGAGGAGG/GAGGTGGAGGAGGAGG	GAGGTGGAGGAGGAGGAGGAGGAGG/GAGGTGGAGGAGGAGGAGGAGGAGG	GAGGTGGAGGAGGAGGAGGAGGAGG/GAGGTGGAGGAGGAGGAGGAGGAGG	GAGGTGGAGGAGGAGGAGGAGG/GAGGTGGAGGAGGAGGAGGAGGAGG	GAGGTGGAGGAGGAGGAGGAGGAGG/GAGGTGGAGGAGGAGGAGGAGGAGG	GAGGTGGAGGAGGAGG/GAGGTGGAGGAGGAGG	GAGGTGGAGGAGGAGGAGGAGGAGG/GAGGTGGAGGAGGAGGAGGAGGAGG	GAGGTGGAGGAGGAGGAGGAGGAGG/GAGGTGGAGGAGGAGGAGGAGGAGG	GAGGTGGAGGAGGAGGAGGAGGAGG/GAGGTGGAGGAGGAGGAGGAGGAGG	GAGGTGGAGGAGGAGGAGGAGGAGG/GAGGTGGAGGAGGAGGAGGAGGAGG	GAGGTGGAGGAGGAGGAGGAGGAGG/GAGGTGGAGGAGGAGGAGGAGGAGG	GAGGTGGAGGAGGAGGAGGAGGAGG/GAGGTGGAGGAGGAGGAGGAGGAGG	GAGGTGGAGGAGGAGGAGGAGGAGG/GAGGTGGAGGAGGAGGAGGAGGAGG	GAGGTGGAGGAGGAGGAGGAGGAGG/GAGGTGGAGGAGGAGGAGGAGGAGG	GAGGTGGAGGAGGAGGAGGAGGAGG/GAGGTGGAGGAGGAGGAGGAGGAGG	GAGGTGGAGGAGGAGGAGGAGGAG/GAGGTGGAGGAGGAGGAGGAGGAGG	GAGGTGGAGGAGGAGGAGGAGGAGG/GAGGTGGAGGAGGAGGAGGAGGAGG	GAGGTGGAGGAGGAGGAGGAGG/GAGGTGGAGGAGGAGGAGGAGGAGG	GAGGTGGAGGAGGAGGAGGAGGAGG/GAGGTGGAGGAGGAGGAGGAGGAGG	GAGGTGGAGGAGGAGGAGGAGGAGG/GAGGTGGAGGAGGAGGAGGAGGAGG	GAGGTGGAGGAGGAGGAGGAGGAGG/GAGGTGGAGGAGGAGGAGGAGGAGG	GAGGTGGAGGAGGAGGAGGAGGAGG/GAGGTGGAGGAGGAGGAGGAGGAGG	GAGGTGGAGGAGGAGGAGGAGGAGG/GAGGTGGAGGAGGAGGAGGAGGAGG	GAGGTGGAGGAGGAGGAGGAGGAGG/GAGGTGGAGGAGGAGGAGGAGGAGG	GAGGTGGAGGAGGAGG/GAGGTGGAGGAGGAGG	GAGGTGGAGGAGGAGGAGGAGGAGG/GAGGTGGAGGAGGAGGAGGAGGAGG	GAGGTGGAGGAGGAGGAGGAGGAGG/GAGGTGGAGGAGGAGGAGGAGGAGG	GAGGTGGAGGAGGAGGAGGAGGAGG/GAGGTGGAGGAGGAGGAGGAGGAGG	GAGGTGGAGGAGGAGGAGGAGGAGG/GAGGTGGAGGAGGAGGAGGAGGAGG	GAGGTGGAGGAGGAGGAGGAGGAGGAGGAGG/GAGGTGGAGGAGGAGGAGGAGGAGGAGGAGG	GAGGTGGAGGAGGAGGAGGAGG/GAGGTGGAGGAGGAGGAGGAGGAGG	GAGGTGGAGGAGGAGGAGGAGGAGG/GAGGTGGAGGAGGAGGAGGAGGAGG	GAGGTGGAGGAGGAGGAGGAGGAGG/GAGGTGGAGGAGGAGGAGGAGGAGG	GAGGTGGAGGAGGAGGAGGAGGAGG/GAGGTGGAGGAGGAGGAGGAGGAGG
Xunr166	10	5072344	TACTCCACCCCGTGAACTGCAGCAGCAGCCAGTCGTCAGC	62.581	TCGGCGTCTACCACTCCGGCGTGCAAGGCACGTTCTGTTC	63.014	AGGGAGGGAGGGAGGGAGGGAGGGAAGGAGGGAGGG	AGGGAGGGAGGGAGG;AGGGAGGGAGGGAGGGAGGGAGG;AGGGAGGGAGGGAGGGAGGGAGGG;AGGGAGGGAGGGAGGGAGGGAGGGAAG;AGGGAGGGAGGGAGGGAGGGAGGGAAGG;AGGGAGGGAGGGAGGGAGGGAGGGAAGGAGG;AGGGAGGGAGGGAGGGAGGGAGGGAAGGAGGG;AGGGAGGGAGGGAGGGAGGGAGGGAAGGAGGGAGG;AGGGAGGGAGGGAGGGAGGGAGGGAAGGAGGGAGGGAGGG;AGGGAGGGAGGGAGGGAGGGAGGGAAGGAGGGAGGGAGGGAGG;AGGGAGGGAGGGAGGGAGGGAGGGAAGGAGGGAGGGAGGGAGGG;AGGGAGGGAGGGAGGGAGGGAGGGAAGGAGGGAGGGAGGGAGGGAG…	AGGGAGGGAGGGAGGGAGGGAGGGAAGGAGGGAGGG/AGGGAGGGAGGGAGGGAGGGAGGGAAGGAGGGAGGG	AGGGAGGGAGGGAGGGAGGGAGGGAAGGAGGGAGGG/AGGGAGGGAGGGAGGGAGGGAGGGAAGGAGGGAGGG	AGGGAGGGAGGGAGGGAGGGAGGGAAGGAGGGAGGG/AGGGAGGGAGGGAGGGAGGGAGGGAAGGAGGGAGGG	AGGGAGGGAGGGAGGGAGGGAGGGAAGG/AGGGAGGGAGGGAGGGAGGGAGGGAAGG	AGGGAGGGAGGGAGGGAGGGAGGGAAGGAGGGAGGG/AGGGAGGGAGGGAGGGAGGGAGGGAAGGAGGGAGGG	./.	./.	AGGGAGGGAGGGAGGGAGGGAGGGAAGGAGGG/AGGGAGGGAGGGAGGGAGGGAGGGAAGGAGGG	AGGGAGGGAGGGAGGGAGGGAGGGAAGGAGGGAGGG/AGGGAGGGAGGGAGGGAGGGAGGGAAGGAGGGAGGG	AGGGAGGGAGGGAGGGAGGGAGGG/AGGGAGGGAGGGAGGGAGGGAGGG	AGGGAGGGAGGGAGGGAGGGAGGGAAGGAGGGAGGG/AGGGAGGGAGGGAGGGAGGGAGGGAAGGAGGGAGGG	AGGGAGGGAGGGAGGGAGGGAGGGAAGGAGGGAGGG/AGGGAGGGAGGGAGGGAGGGAGGGAAGGAGGGAGGG	AGGGAGGGAGGGAGGGAGGGAGGGAAGGAGGG/AGGGAGGGAGGGAGGGAGGGAGGGAAGGAGGG	AGGGAGGGAGGGAGGGAGGGAGGGAAGGAGGGAGGGAGGGAGGGAGGG/AGGGAGGGAGGGAGGGAGGGAGGGAAGGAGGGAGGGAGGGAGGGAGGG	./.	AGGGAGGGAGGGAGGGAGGGAGGGAAGGAGGG/AGGGAGGGAGGGAGGGAGGGAGGGAAGGAGGGAGGG	AGGGAGGGAGGGAGGGAGGGAGGGAAGGAGGGAGGG/AGGGAGGGAGGGAGGGAGGGAGGGAAGGAGGGAGGG	AGGGAGGGAGGGAGGGAGGGAGGGAAGGAGGGAGGG/AGGGAGGGAGGGAGGGAGGGAGGGAAGGAGGGAGGG	AGGGAGGGAGGGAGGGAGGGAGGGAAGGAGGGAGGGAGGG/AGGGAGGGAGGGAGGGAGGGAGGGAAGGAGGGAGGGAGGGAGGG	AGGGAGGGAGGGAGGGAGGGAGGGAAGGAGGG/AGGGAGGGAGGGAGGGAGGGAGGGAAGGAGGGAGGG	AGGGAGGGAGGGAGGGAGGGAGGGAAGGAGGGAGGG/AGGGAGGGAGGGAGGGAGGGAGGGAAGGAGGGAGGGAGGGAGGG	AGGGAGGGAGGGAGGGAGGGAGGGAAGGAGGGAGGG/AGGGAGGGAGGGAGGGAGGGAGGGAAGGAGGGAGGG	AGGGAGGGAGGGAGGGAGGGAGGGAAGGAGGGAGGGAGGGAGGG/AGGGAGGGAGGGAGGGAGGGAGGGAAGGAGGGAGGGAGGGAGGG	AGGGAGGGAGGGAGGGAGGGAGGGAAGGAGGG/AGGGAGGGAGGGAGGGAGGGAGGGAAGGAGGGAGGG	AGGGAGGGAGGGAGGGAGGGAGGGAAGGAGGGAGGG/AGGGAGGGAGGGAGGGAGGGAGGGAAGGAGGGAGGG	AGGGAGGGAGGGAGGGAGGGAGGGAAGGAGGGAGGG/AGGGAGGGAGGGAGGGAGGGAGGGAAGGAGGGAGGG	AGGGAGGGAGGGAGGGAGGGAGGGAAGGAGGGAGGGAGGG/AGGGAGGGAGGGAGGGAGGGAGGGAAGGAGGGAGGGAGGG	AGGGAGGGAGGGAGGGAGGGAGGGAAGGAGGGAGGG/AGGGAGGGAGGGAGGGAGGGAGGGAAGGAGGGAGGGAGGGAGGGAGGG	AGGGAGGGAGGGAGGGAGGGAGGGAAGGAGGGAGGGAGGGAGGGAGGG/AGGGAGGGAGGGAGGGAGGGAGGGAAGGAGGGAGGGAGGGAGGGAGGG	AGGGAGGGAGGGAGGGAGGGAGGGAAGGAGGGAGGG/AGGGAGGGAGGGAGGGAGGGAGGGAAGGAGGGAGGGAGGG	AGGGAGGGAGGGAGGGAGGGAGGGAAGGAGGG/AGGGAGGGAGGGAGGGAGGGAGGGAAGGAGGGAGGG	AGGGAGGGAGGGAGGGAGGGAGGGAAGGAGGG/AGGGAGGGAGGGAGGGAGGGAGGGAAGGAGGG	AGGGAGGGAGGGAGGGAGGGAGGGAAGGAGGG/AGGGAGGGAGGGAGGGAGGGAGGGAAGGAGGGAGGG	AGGGAGGGAGGGAGGGAGGGAGGGAAGGAGGGAGGG/AGGGAGGGAGGGAGGGAGGGAGGGAAGGAGGGAGGG	AGGGAGGGAGGGAGGGAGGGAGGGAAGGAGG/AGGGAGGGAGGGAGGGAGGGAGGGAAGGAGGG	AGGGAGGGAGGGAGGGAGGGAGGGAAGGAGGGAGGG/AGGGAGGGAGGGAGGGAGGGAGGGAAGGAGGGAGGG	AGGGAGGGAGGGAGGGAGGGAGGGAAGGAGGGAGGGAGGG/AGGGAGGGAGGGAGGGAGGGAGGGAAGGAGGGAGGGAGGG	AGGGAGGGAGGGAGGGAGGGAGGGAAGGAGGGAGGGAGGG/AGGGAGGGAGGGAGGGAGGGAGGGAAGGAGGGAGGGAGGGAGGG	./.	AGGGAGGGAGGGAGGGAGGGAGGGAAGGAGGGAGGGAGGGAGGG/AGGGAGGGAGGGAGGGAGGGAGGGAAGGAGGGAGGGAGGGAGGG	AGGGAGGGAGGGAGGGAGGGAGGGAAGGAGGGAGGG/AGGGAGGGAGGGAGGGAGGGAGGGAAGGAGGGAGGG
Xunr167	10	5200979	ATATAGGTGCATGAAATTAAAGAAGGGTTCTTGTTCTTGG	50.064	GCGGCCGCCGGGCAGCCACAATTTGGCCAGGTAAGATCAC	63.993	TATATATATATATATATATATATATATATATATATATATA	TATATATA;TATATATAT;TATATATATA;TATATATATAT;TATATATATATA;TATATATATATATA	TATATATATATA/TATATATATATA	./.	./.	./.	./.	./.	./.	./.	./.	./.	./.	./.	./.	./.	./.	./.	./.	./.	./.	./.	./.	./.	./.	./.	./.	./.	./.	./.	./.	./.	TATATATATA/TATATATATA	./.	./.	./.	./.	./.	TATATATA/TATATATA	./.	./.	./.	./.
Xunr168	10	5273262	CGGGGTCGGGGGCATAGCCAAGAACATGCGTTTCCGTTCG	62.392	AGCCGGACGCCTTCCAGACCGACGGCAGCGACGCCAGGTG	67.245	GAGGAGGAGGAGGAGGAGGAGGAGGA	GAGGAGGA;GAGGAGGAGG;GAGGAGGAGGA;GAGGAGGAGGAGG;GAGGAGGAGGAGGAGG;GAGGAGGAGGAGGAGGA;GAGGAGGAGGAGGAGGAGG;GAGGAGGAGGAGGAGGAGGA;GAGGAGGAGGAGGAGGAGGAGG;GAGGAGGAGGAGGAGGAGGAGGA;GAGGAGGAGGAGGAGGAGGAGGAGG;GAGGAGGAGGAGGAGGAGGAGGAGGAGG;GAGGAGGAGGAGGAGGAGGAGGAGGAGGA;GAGGAGGAGGAGGAGGAGGAGGAGGAGGAG;GAGGAGGAGGAGGAGGAGGAGGAGGAGGAGG	GAGGAGGAGGAGGAGGAGGAGGAGGA/GAGGAGGAGGAGGAGGAGGAGGAGGAGGA	GAGGAGGA/GAGGAGGAGGAGGAGGAGGAGGAGG	GAGGAGGAGGAGGAGGAGGAGGAGGA/GAGGAGGAGGAGGAGGAGGAGGAGGAGGA	GAGGAGGAGGAGGAGGAGGAGGAGGA/GAGGAGGAGGAGGAGGAGGAGGAGGAGGA	GAGGAGGAGGAGGAGGAGGAGGAGGA/GAGGAGGAGGAGGAGGAGGAGGAGGAGGA	GAGGAGGAGGAGGAGGAGGAGGAGGA/GAGGAGGAGGAGGAGGAGGAGGAGGA	GAGGAGGAGGAGGAGGAGGAGGAGGAGGA/GAGGAGGAGGAGGAGGAGGAGGAGGAGGA	GAGGAGGAGGAGGAGGAGGA/GAGGAGGAGGAGGAGGAGGAGGA	GAGGAGGAGGAGGAGGAGGAGGA/GAGGAGGAGGAGGAGGAGGAGGAGGA	GAGGAGGAGGAGGAGGAGGAGGAGGA/GAGGAGGAGGAGGAGGAGGAGGAGGAGGA	GAGGAGGAGGAGGAGGAGGAGGAGGAGGA/GAGGAGGAGGAGGAGGAGGAGGAGGAGGA	GAGGAGGAGGAGGAGGAGGAGGAGGA/GAGGAGGAGGAGGAGGAGGAGGAGGAGGA	GAGGAGGAGGAGGAGGAGGA/GAGGAGGAGGAGGAGGAGGAGGA	GAGGAGGAGGA/GAGGAGGAGGAGGAGGAGGAGGAGGA	GAGGAGGAGGAGGAGGAGGAGGAGGA/GAGGAGGAGGAGGAGGAGGAGGAGGAGGA	GAGGAGGAGGAGGAGGAGGAGGA/GAGGAGGAGGAGGAGGAGGAGGAGGA	GAGGAGGAGGA/GAGGAGGAGGAGGAGGAGGAGGAGGA	GAGGAGGAGGA/GAGGAGGAGGA	GAGGAGGAGGAGGAGGAGGAGGAGGA/GAGGAGGAGGAGGAGGAGGAGGAGGAGGA	GAGGAGGAGGA/GAGGAGGAGGA	GAGGAGGAGGA/GAGGAGGAGGA	GAGGAGGAGGAGGAGGAGGAGGAGGA/GAGGAGGAGGAGGAGGAGGAGGAGGA	GAGGAGGAGGA/GAGGAGGAGGA	GAGGAGGAGGAGGAGGAGGAGGAGGA/GAGGAGGAGGAGGAGGAGGAGGAGGAGGA	GAGGAGGAGGAGGAGGAGGAGGA/GAGGAGGAGGAGGAGGAGGAGGAGGA	GAGGAGGAGGAGGAGGAGGAGGAGGAGGA/GAGGAGGAGGAGGAGGAGGAGGAGGAGGA	GAGGAGGAGGAGGAGGAGGAGGAGGAGGA/GAGGAGGAGGAGGAGGAGGAGGAGGAGGA	GAGGAGGAGGAGGAGGAGGAGGAGGAGGA/GAGGAGGAGGAGGAGGAGGAGGAGGAGGA	GAGGAGGAGGAGGAGGAGGAGGAGGA/GAGGAGGAGGAGGAGGAGGAGGAGGA	GAGGAGGAGGAGGAGGAGGAGGAGGA/GAGGAGGAGGAGGAGGAGGAGGAGGAGGA	GAGGAGGAGG/GAGGAGGAGGA	GAGGAGGAGGAGGAGGAGGA/GAGGAGGAGGAGGAGGAGGAGGA	GAGGAGGAGGAGGAGGAGGAGGA/GAGGAGGAGGAGGAGGAGGAGGAGGA	GAGGAGGAGGAGGAGGAGGAGGAGGA/GAGGAGGAGGAGGAGGAGGAGGAGGA	GAGGAGGAGGAGGAGGAGGAGGAGGA/GAGGAGGAGGAGGAGGAGGAGGAGGAGGA	GAGGAGGAGGAGG/GAGGAGGAGGAGGAGGAGGAGGAGGA	GAGGAGGAGGAGGAGGAGGAGGAGGA/GAGGAGGAGGAGGAGGAGGAGGAGGA	GAGGAGGAGGAGGAGGAGGAGGAGGA/GAGGAGGAGGAGGAGGAGGAGGAGGAGGA	GAGGAGGAGGAGGAGGAGGAGGAGGAGGA/GAGGAGGAGGAGGAGGAGGAGGAGGAGGA	GAGGAGGAGGAGGAGGAGGAGGAGGAGGA/GAGGAGGAGGAGGAGGAGGAGGAGGAGGA	GAGGAGGAGGA/GAGGAGGAGGA
Xunr169	10	9309974	CTCCGCAGTCGGCACCGCGTGAGCCAAACCCTCCCAGCTC	65.387	GGGCGGCGGCCGCGGTGGACTCGGCGCCGGAGAAGAAAGG	69.001	CCCCCGCCCCCGCCCCCGCCCCCG	CCCCCGCCCCCG;CCCCCGCCCCCGCCCCC;CCCCCGCCCCCGCCCCCG;CCCCCGCCCCCGCCCCCGCCCCC;CCCCCGCCCCCGCCCCCGCCCCCGCCCCCG	CCCCCGCCCCCGCCCCCGCCCCCG/CCCCCGCCCCCGCCCCCGCCCCCG	CCCCCGCCCCCGCCCCCG/CCCCCGCCCCCGCCCCCGCCCCCG	CCCCCGCCCCCGCCCCCGCCCCCG/CCCCCGCCCCCGCCCCCGCCCCCG	CCCCCGCCCCCGCCCCCGCCCCCGCCCCCG/CCCCCGCCCCCGCCCCCGCCCCCGCCCCCG	CCCCCGCCCCCGCCCCCGCCCCCG/CCCCCGCCCCCGCCCCCGCCCCCG	CCCCCGCCCCCGCCCCCGCCCCCG/CCCCCGCCCCCGCCCCCGCCCCCG	CCCCCGCCCCCGCCCCCGCCCCCG/CCCCCGCCCCCGCCCCCGCCCCCG	./.	CCCCCGCCCCCGCCCCCGCCCCCG/CCCCCGCCCCCGCCCCCGCCCCCG	./.	CCCCCGCCCCCGCCCCCGCCCCCG/CCCCCGCCCCCGCCCCCGCCCCCG	CCCCCGCCCCCGCCCCCGCCCCCG/CCCCCGCCCCCGCCCCCGCCCCCG	CCCCCGCCCCCGCCCCCGCCCCCG/CCCCCGCCCCCGCCCCCGCCCCCG	CCCCCGCCCCCGCCCCCGCCCCCGCCCCCG/CCCCCGCCCCCGCCCCCGCCCCCGCCCCCG	CCCCCGCCCCCGCCCCCGCCCCCG/CCCCCGCCCCCGCCCCCGCCCCCG	CCCCCGCCCCCGCCCCCGCCCCCG/CCCCCGCCCCCGCCCCCGCCCCCG	CCCCCGCCCCCGCCCCCGCCCCCG/CCCCCGCCCCCGCCCCCGCCCCCG	CCCCCGCCCCCGCCCCCGCCCCCG/CCCCCGCCCCCGCCCCCGCCCCCG	CCCCCGCCCCCGCCCCCGCCCCCG/CCCCCGCCCCCGCCCCCGCCCCCG	./.	CCCCCGCCCCCGCCCCCGCCCCCG/CCCCCGCCCCCGCCCCCGCCCCCG	./.	CCCCCGCCCCCGCCCCCGCCCCCG/CCCCCGCCCCCGCCCCCGCCCCCG	CCCCCGCCCCCGCCCCCGCCCCCG/CCCCCGCCCCCGCCCCCGCCCCCG	CCCCCGCCCCCGCCCCCGCCCCCG/CCCCCGCCCCCGCCCCCGCCCCCG	CCCCCGCCCCCGCCCCCGCCCCCG/CCCCCGCCCCCGCCCCCGCCCCCG	CCCCCGCCCCCGCCCCCGCCCCCG/CCCCCGCCCCCGCCCCCGCCCCCG	CCCCCGCCCCCGCCCCCG/CCCCCGCCCCCGCCCCCGCCCCCG	CCCCCGCCCCCGCCCCCGCCCCCG/CCCCCGCCCCCGCCCCCGCCCCCG	CCCCCGCCCCCGCCCCCGCCCCCG/CCCCCGCCCCCGCCCCCGCCCCCG	CCCCCGCCCCCGCCCCCGCCCCCG/CCCCCGCCCCCGCCCCCGCCCCCG	CCCCCGCCCCCGCCCCCGCCCCCG/CCCCCGCCCCCGCCCCCGCCCCCG	CCCCCGCCCCCGCCCCCGCCCCCG/CCCCCGCCCCCGCCCCCGCCCCCG	CCCCCGCCCCCGCCCCCGCCCCCG/CCCCCGCCCCCGCCCCCGCCCCCG	CCCCCGCCCCCGCCCCCGCCCCCG/CCCCCGCCCCCGCCCCCGCCCCCG	CCCCCGCCCCCGCCCCCGCCCCCG/CCCCCGCCCCCGCCCCCGCCCCCG	CCCCCGCCCCCG/CCCCCGCCCCCG	CCCCCGCCCCCGCCCCCGCCCCCG/CCCCCGCCCCCGCCCCCGCCCCCG	CCCCCGCCCCCGCCCCCGCCCCCG/CCCCCGCCCCCGCCCCCGCCCCCG	CCCCCGCCCCCGCCCCCGCCCCCG/CCCCCGCCCCCGCCCCCGCCCCCG	CCCCCGCCCCCGCCCCCG/CCCCCGCCCCCGCCCCCGCCCCCG
Xunr170	10	11016877	ATGATCGCCTCCTCTGGTCGCGATTTACCCCGAGGTGGAC	60.678	GAAGCAAGCGGTTCGAGGGCTCCTAGCCACAGTTTTCCAC	59.823	CTCTCTCTCTCTCTCTCTC	CTCTCTCTC;CTCTCTCTCTC;CTCTCTCTCTCTC;CTCTCTCTCTCTCTC;CTCTCTCTCTCTCTCTC;CTCTCTCTCTCTCTCTCTCTC;CTCTCTCTCTCTCTCTCTCTCTCTC;CTCTCTCTCTCTCTCTCTCTCTCTCTC;CTCTCTCTCTCTCTCTCTCTCTCTCTCTC;CTCTCTCTCTCTCTCTCTCTCTCTCTCTCTC	CTCTCTCTCTCTCTCTCTCTCTCTCTC/CTCTCTCTCTCTCTCTCTCTCTCTCTC	CTCTCTCTCTCTCTC/CTCTCTCTCTCTCTC	CTCTCTCTCTCTCTCTC/CTCTCTCTCTCTCTCTCTC	./.	./.	CTCTCTCTCTCTCTCTC/CTCTCTCTCTCTCTCTCTC	./.	CTCTCTCTCTCTCTCTCTCTCTCTCTC/CTCTCTCTCTCTCTCTCTCTCTCTCTCTCTC	CTCTCTCTCTCTCTCTC/CTCTCTCTCTCTCTCTCTC	CTCTCTCTCTCTCTCTC/CTCTCTCTCTCTCTCTCTC	CTCTCTCTCTCTCTCTC/CTCTCTCTCTCTCTCTCTC	CTCTCTCTCTCTCTC/CTCTCTCTCTCTCTCTC	CTCTCTCTCTCTCTCTCTCTCTCTC/CTCTCTCTCTCTCTCTCTCTCTCTCTC	CTCTCTCTCTCTCTCTCTC/CTCTCTCTCTCTCTCTCTCTC	CTCTCTCTCTCTCTCTC/CTCTCTCTCTCTCTCTC	CTCTCTCTCTCTCTCTCTC/CTCTCTCTCTCTCTCTCTCTC	CTCTCTCTCTCTCTCTCTC/CTCTCTCTCTCTCTCTCTC	./.	CTCTCTCTCTCTCTCTC/CTCTCTCTCTCTCTCTCTC	CTCTCTCTCTCTCTCTCTC/CTCTCTCTCTCTCTCTCTC	CTCTCTCTCTCTC/CTCTCTCTCTCTCTCTCTC	CTCTCTCTCTCTCTC/CTCTCTCTCTCTCTCTC	CTCTCTCTCTCTCTCTC/CTCTCTCTCTCTCTCTCTC	CTCTCTCTCTCTCTCTC/CTCTCTCTCTCTCTCTCTC	CTCTCTCTCTCTCTCTC/CTCTCTCTCTCTCTCTCTC	CTCTCTCTCTCTCTCTCTC/CTCTCTCTCTCTCTCTCTCTC	CTCTCTCTCTCTCTCTC/CTCTCTCTCTCTCTCTC	CTCTCTCTCTCTCTCTCTC/CTCTCTCTCTCTCTCTCTCTC	CTCTCTCTCTCTCTCTC/CTCTCTCTCTCTCTCTCTC	CTCTCTCTCTCTCTCTC/CTCTCTCTCTCTCTCTCTC	./.	CTCTCTCTCTCTCTCTCTCTCTCTCTCTC/CTCTCTCTCTCTCTCTCTCTCTCTCTCTCTC	./.	CTCTCTCTCTCTCTCTCTC/CTCTCTCTCTCTCTCTCTCTC	CTCTCTCTCTCTCTCTC/CTCTCTCTCTCTCTCTCTC	CTCTCTCTCTCTCTCTC/CTCTCTCTCTCTCTCTCTC	CTCTCTCTCTCTCTCTCTCTCTCTC/CTCTCTCTCTCTCTCTCTCTCTCTCTC	./.	CTCTCTCTCTCTCTCTC/CTCTCTCTCTCTCTCTCTC	CTCTCTCTCTCTCTCTC/CTCTCTCTCTCTCTCTCTC	./.
Xunr171	10	11693715	TCGCTTCAATCCTCGCAGCTTTTCACTTGGCAGTTGCTTG	58.334	TCTCCTTGTCCTCTCCTCCTGGACCGCCGCTAGCTTCTTG	60.129	AAATCGAAATCGAAATCGAAATCGAAATC	AAATCGAAATCGAAATC;AAATCGAAATCGAAATCGAAATC;AAATCGAAATCGAAATCGAAATCGAAAT;AAATCGAAATCGAAATCGAAATCGAAATCGAAATC;AAATCGAAATCGAAATCGAAATCGAAATCGAAATCGAAATC	AAATCGAAATCGAAATCGAAATC/AAATCGAAATCGAAATCGAAATCGAAATC	AAATCGAAATCGAAATCGAAATCGAAATCGAAATC/AAATCGAAATCGAAATCGAAATCGAAATCGAAATC	AAATCGAAATCGAAATCGAAATCGAAATC/AAATCGAAATCGAAATCGAAATCGAAATC	AAATCGAAATCGAAATC/AAATCGAAATCGAAATC	AAATCGAAATCGAAATCGAAATCGAAATC/AAATCGAAATCGAAATCGAAATCGAAATC	AAATCGAAATCGAAATCGAAATCGAAATC/AAATCGAAATCGAAATCGAAATCGAAATC	AAATCGAAATCGAAATC/AAATCGAAATCGAAATC	AAATCGAAATCGAAATCGAAATCGAAATC/AAATCGAAATCGAAATCGAAATCGAAATC	AAATCGAAATCGAAATCGAAATC/AAATCGAAATCGAAATCGAAATC	AAATCGAAATCGAAATC/AAATCGAAATCGAAATC	AAATCGAAATCGAAATCGAAATCGAAATC/AAATCGAAATCGAAATCGAAATCGAAATCGAAATC	AAATCGAAATCGAAATCGAAATCGAAATC/AAATCGAAATCGAAATCGAAATCGAAATC	AAATCGAAATCGAAATCGAAATCGAAATC/AAATCGAAATCGAAATCGAAATCGAAATC	AAATCGAAATCGAAATC/AAATCGAAATCGAAATC	AAATCGAAATCGAAATCGAAATCGAAATC/AAATCGAAATCGAAATCGAAATCGAAATC	AAATCGAAATCGAAATCGAAATCGAAATC/AAATCGAAATCGAAATCGAAATCGAAATC	AAATCGAAATCGAAATCGAAATCGAAATC/AAATCGAAATCGAAATCGAAATCGAAATC	AAATCGAAATCGAAATCGAAATCGAAATC/AAATCGAAATCGAAATCGAAATCGAAATC	AAATCGAAATCGAAATCGAAATCGAAATC/AAATCGAAATCGAAATCGAAATCGAAATC	AAATCGAAATCGAAATCGAAATCGAAATCGAAATC/AAATCGAAATCGAAATCGAAATCGAAATCGAAATC	AAATCGAAATCGAAATCGAAATCGAAATC/AAATCGAAATCGAAATCGAAATCGAAATC	AAATCGAAATCGAAATCGAAATCGAAATCGAAATCGAAATC/AAATCGAAATCGAAATCGAAATCGAAATCGAAATCGAAATC	AAATCGAAATCGAAATCGAAATCGAAATC/AAATCGAAATCGAAATCGAAATCGAAATC	AAATCGAAATCGAAATCGAAATCGAAATC/AAATCGAAATCGAAATCGAAATCGAAATC	AAATCGAAATCGAAATCGAAATCGAAATC/AAATCGAAATCGAAATCGAAATCGAAATC	AAATCGAAATCGAAATCGAAATCGAAATC/AAATCGAAATCGAAATCGAAATCGAAATCGAAATCGAAATC	AAATCGAAATCGAAATC/AAATCGAAATCGAAATC	AAATCGAAATCGAAATC/AAATCGAAATCGAAATCGAAATCGAAATCGAAATCGAAATC	AAATCGAAATCGAAATCGAAATCGAAATC/AAATCGAAATCGAAATCGAAATCGAAATC	AAATCGAAATCGAAATCGAAATCGAAATC/AAATCGAAATCGAAATCGAAATCGAAATC	AAATCGAAATCGAAATCGAAATCGAAATC/AAATCGAAATCGAAATCGAAATCGAAATC	AAATCGAAATCGAAATCGAAATCGAAATC/AAATCGAAATCGAAATCGAAATCGAAATC	AAATCGAAATCGAAATCGAAATCGAAATC/AAATCGAAATCGAAATCGAAATCGAAATC	AAATCGAAATCGAAATCGAAATCGAAATCGAAATCGAAATC/AAATCGAAATCGAAATCGAAATCGAAATCGAAATCGAAATC	AAATCGAAATCGAAATCGAAATCGAAATC/AAATCGAAATCGAAATCGAAATCGAAATC	AAATCGAAATCGAAATCGAAATCGAAATC/AAATCGAAATCGAAATCGAAATCGAAATC	AAATCGAAATCGAAATCGAAATCGAAATC/AAATCGAAATCGAAATCGAAATCGAAATC	AAATCGAAATCGAAATCGAAATCGAAATC/AAATCGAAATCGAAATCGAAATCGAAATC	AAATCGAAATCGAAATCGAAATCGAAATC/AAATCGAAATCGAAATCGAAATCGAAATC	AAATCGAAATCGAAATCGAAATCGAAATC/AAATCGAAATCGAAATCGAAATCGAAATC	AAATCGAAATCGAAATCGAAATCGAAATC/AAATCGAAATCGAAATCGAAATCGAAATC
Xunr172	10	15124699	GCATCTGTATCAGCGGGCCACCTTCCAGATGCTCAGATCG	59.276	CCGCGCGGCAAACTCTCACTGCTAGCCTCAAATTGCTAGT	59.893	CGGCAACGGCAACGGCA	CGGCAACGGCA;CGGCAACGGCAACGGCAACGGCA	./.	CGGCAACGGCAACGGCAACGGCA/CGGCAACGGCAACGGCAACGGCA	CGGCAACGGCAACGGCA/CGGCAACGGCAACGGCA	./.	./.	CGGCAACGGCAACGGCA/CGGCAACGGCAACGGCA	CGGCAACGGCAACGGCA/CGGCAACGGCAACGGCA	./.	CGGCAACGGCAACGGCA/CGGCAACGGCAACGGCA	CGGCAACGGCAACGGCA/CGGCAACGGCAACGGCA	CGGCAACGGCAACGGCA/CGGCAACGGCAACGGCA	CGGCAACGGCAACGGCA/CGGCAACGGCAACGGCA	./.	./.	CGGCAACGGCAACGGCA/CGGCAACGGCAACGGCA	CGGCAACGGCAACGGCA/CGGCAACGGCAACGGCA	CGGCAACGGCAACGGCA/CGGCAACGGCAACGGCA	CGGCAACGGCAACGGCA/CGGCAACGGCAACGGCA	CGGCAACGGCAACGGCA/CGGCAACGGCAACGGCA	CGGCAACGGCAACGGCA/CGGCAACGGCAACGGCA	CGGCAACGGCAACGGCA/CGGCAACGGCAACGGCA	CGGCAACGGCAACGGCA/CGGCAACGGCAACGGCA	./.	CGGCAACGGCAACGGCA/CGGCAACGGCAACGGCA	CGGCAACGGCAACGGCA/CGGCAACGGCAACGGCA	CGGCAACGGCAACGGCA/CGGCAACGGCAACGGCA	./.	CGGCAACGGCAACGGCA/CGGCAACGGCAACGGCA	CGGCAACGGCAACGGCA/CGGCAACGGCAACGGCA	CGGCAACGGCAACGGCA/CGGCAACGGCAACGGCA	CGGCAACGGCAACGGCAACGGCA/CGGCAACGGCAACGGCAACGGCA	./.	CGGCAACGGCAACGGCA/CGGCAACGGCAACGGCA	CGGCAACGGCAACGGCA/CGGCAACGGCAACGGCA	CGGCAACGGCAACGGCA/CGGCAACGGCAACGGCA	CGGCAACGGCAACGGCA/CGGCAACGGCAACGGCA	./.	CGGCAACGGCAACGGCA/CGGCAACGGCAACGGCA	CGGCAACGGCAACGGCA/CGGCAACGGCAACGGCA	CGGCAACGGCAACGGCA/CGGCAACGGCAACGGCA	CGGCAACGGCAACGGCA/CGGCAACGGCAACGGCA
Xunr173	10	45973732	GACGCCTGCTCGGTGCGGCACGCGCGTGCGGAGGAGGTGG	69.307	CCGCAGTCAATGCACTGCTCCTGCTCGCGTCCGCGTGTTC	64.064	GTGCCGGTGCCGGTGCCGGTGCGGCTGGAGCTGGAGCTGGAGCTGG	GTGCCGGTGCCGGTGCCGGTGC;GTGCCGGTGCCGGTGCCGGTGCGGCTGG;GTGCCGGTGCCGGTGCCGGTGCGGCTGGAGCTGG;GTGCCGGTGCCGGTGCCGGTGCGGCTGGAGCTGGAGC;GTGCCGGTGCCGGTGCCGGTGCGGCTGGAGCTGGAGCTG;GTGCCGGTGCCGGTGCCGGTGCGGCTGGAGCTGGAGCTGG;GTGCCGGTGCCGGTGCCGGTGCGGCTGGAGCTGGAGCTGGA;GTGCCGGTGCCGGTGCCGGTGCGGCTGGAGCTGGAGCTGGAGCTGGCGGTGC	./.	./.	GTGCCGGTGCCGGTGCCGGTGCGGCTGGAGCTGGAGCTGG/GTGCCGGTGCCGGTGCCGGTGCGGCTGGAGCTGGAGCTGG	./.	GTGCCGGTGCCGGTGCCGGTGCGGCTGGAGCTGGAGCTGGAGCTGG/GTGCCGGTGCCGGTGCCGGTGCGGCTGGAGCTGGAGCTGGAGCTGG	GTGCCGGTGCCGGTGCCGGTGCGGCTGGAGCTGGAGCTGGAGCTGG/GTGCCGGTGCCGGTGCCGGTGCGGCTGGAGCTGGAGCTGGAGCTGG	GTGCCGGTGCCGGTGCCGGTGCGGCTGGAGCTGGAGCTGG/GTGCCGGTGCCGGTGCCGGTGCGGCTGGAGCTGGAGCTGG	./.	GTGCCGGTGCCGGTGCCGGTGCGGCTGGAGCTGGAGCTGG/GTGCCGGTGCCGGTGCCGGTGCGGCTGGAGCTGGAGCTGG	./.	./.	./.	./.	GTGCCGGTGCCGGTGCCGGTGCGGCTGGAGCTGGAGCTGG/GTGCCGGTGCCGGTGCCGGTGCGGCTGGAGCTGGAGCTGG	./.	./.	GTGCCGGTGCCGGTGCCGGTGCGGCTGGAGCTGGAGCTGG/GTGCCGGTGCCGGTGCCGGTGCGGCTGGAGCTGGAGCTGG	./.	./.	./.	GTGCCGGTGCCGGTGCCGGTGCGGCTGGAGCTGGAGCTGG/GTGCCGGTGCCGGTGCCGGTGCGGCTGGAGCTGGAGCTGG	./.	GTGCCGGTGCCGGTGCCGGTGCGGCTGGAGCTGGAGCTGGAGCTGG/GTGCCGGTGCCGGTGCCGGTGCGGCTGGAGCTGGAGCTGGAGCTGG	GTGCCGGTGCCGGTGCCGGTGCGGCTGGAGCTGGAGCTGGAGCTGG/GTGCCGGTGCCGGTGCCGGTGCGGCTGGAGCTGGAGCTGGAGCTGG	GTGCCGGTGCCGGTGCCGGTGCGGCTGGAGCTGGAGCTGGAGCTGG/GTGCCGGTGCCGGTGCCGGTGCGGCTGGAGCTGGAGCTGGAGCTGG	GTGCCGGTGCCGGTGCCGGTGCGGCTGGAGCTGGAGCTGGAGCTGG/GTGCCGGTGCCGGTGCCGGTGCGGCTGGAGCTGGAGCTGGAGCTGG	./.	GTGCCGGTGCCGGTGCCGGTGCGGCTGGAGCTGGAGCTGGAGCTGG/GTGCCGGTGCCGGTGCCGGTGCGGCTGGAGCTGGAGCTGGAGCTGG	GTGCCGGTGCCGGTGCCGGTGCGGCTGGAGCTGGAGCTGG/GTGCCGGTGCCGGTGCCGGTGCGGCTGGAGCTGGAGCTGG	GTGCCGGTGCCGGTGCCGGTGCGGCTGGAGCTGGAGCTGG/GTGCCGGTGCCGGTGCCGGTGCGGCTGGAGCTGGAGCTGG	./.	./.	./.	GTGCCGGTGCCGGTGCCGGTGCGGCTGGAGCTGGAGCTGGAGCTGG/GTGCCGGTGCCGGTGCCGGTGCGGCTGGAGCTGGAGCTGGAGCTGG	./.	GTGCCGGTGCCGGTGCCGGTGCGGCTGGAGCTGGAGCTGG/GTGCCGGTGCCGGTGCCGGTGCGGCTGGAGCTGGAGCTGG	./.	GTGCCGGTGCCGGTGCCGGTGCGGCTGGAGCTGGAGCTGG/GTGCCGGTGCCGGTGCCGGTGCGGCTGGAGCTGGAGCTGG	./.	./.	./.
Xunr174	10	46036905	GTGAACGACGCGAGCCTCGGCCGACGGCCGACGATGAGGC	66.671	GTCAATGGAGGTGGCGGCGGAGGAAGCGGCAATAATGTGG	61.252	CTCTCCCTCTCCCTCTCCC	CTCTCCCTCTCCC;CTCTCCCTCTCCCTCTCCCTCTCCC	CTCTCCCTCTCCCTCTCCCTCTCCC/CTCTCCCTCTCCCTCTCCCTCTCCC	CTCTCCCTCTCCCTCTCCCTCTCCC/CTCTCCCTCTCCCTCTCCCTCTCCC	CTCTCCCTCTCCCTCTCCC/CTCTCCCTCTCCCTCTCCC	CTCTCCCTCTCCCTCTCCC/CTCTCCCTCTCCCTCTCCC	CTCTCCCTCTCCCTCTCCC/CTCTCCCTCTCCCTCTCCC	CTCTCCCTCTCCCTCTCCC/CTCTCCCTCTCCCTCTCCC	CTCTCCCTCTCCCTCTCCC/CTCTCCCTCTCCCTCTCCC	CTCTCCCTCTCCCTCTCCC/CTCTCCCTCTCCCTCTCCC	CTCTCCCTCTCCCTCTCCC/CTCTCCCTCTCCCTCTCCC	CTCTCCCTCTCCCTCTCCC/CTCTCCCTCTCCCTCTCCC	CTCTCCCTCTCCCTCTCCC/CTCTCCCTCTCCCTCTCCC	CTCTCCCTCTCCCTCTCCC/CTCTCCCTCTCCCTCTCCC	CTCTCCCTCTCCCTCTCCC/CTCTCCCTCTCCCTCTCCC	CTCTCCCTCTCCCTCTCCC/CTCTCCCTCTCCCTCTCCC	CTCTCCCTCTCCCTCTCCC/CTCTCCCTCTCCCTCTCCC	CTCTCCCTCTCCCTCTCCC/CTCTCCCTCTCCCTCTCCC	CTCTCCCTCTCCCTCTCCC/CTCTCCCTCTCCCTCTCCC	./.	CTCTCCCTCTCCCTCTCCC/CTCTCCCTCTCCCTCTCCC	CTCTCCCTCTCCCTCTCCCTCTCCC/CTCTCCCTCTCCCTCTCCCTCTCCC	CTCTCCCTCTCCCTCTCCC/CTCTCCCTCTCCCTCTCCC	CTCTCCCTCTCCCTCTCCC/CTCTCCCTCTCCCTCTCCC	CTCTCCCTCTCCCTCTCCC/CTCTCCCTCTCCCTCTCCC	CTCTCCCTCTCCCTCTCCC/CTCTCCCTCTCCCTCTCCCTCTCCC	CTCTCCCTCTCCCTCTCCC/CTCTCCCTCTCCCTCTCCC	CTCTCCCTCTCCCTCTCCC/CTCTCCCTCTCCCTCTCCC	CTCTCCCTCTCCCTCTCCC/CTCTCCCTCTCCCTCTCCC	CTCTCCCTCTCCCTCTCCC/CTCTCCCTCTCCCTCTCCC	CTCTCCCTCTCCCTCTCCC/CTCTCCCTCTCCCTCTCCC	CTCTCCCTCTCCCTCTCCC/CTCTCCCTCTCCCTCTCCC	CTCTCCCTCTCCCTCTCCC/CTCTCCCTCTCCCTCTCCC	CTCTCCCTCTCCCTCTCCC/CTCTCCCTCTCCCTCTCCC	CTCTCCCTCTCCCTCTCCC/CTCTCCCTCTCCCTCTCCC	CTCTCCCTCTCCCTCTCCC/CTCTCCCTCTCCCTCTCCC	CTCTCCCTCTCCCTCTCCC/CTCTCCCTCTCCCTCTCCC	CTCTCCCTCTCCCTCTCCC/CTCTCCCTCTCCCTCTCCC	CTCTCCCTCTCCCTCTCCCTCTCCC/CTCTCCCTCTCCCTCTCCCTCTCCC	CTCTCCCTCTCCCTCTCCC/CTCTCCCTCTCCCTCTCCC	CTCTCCCTCTCCCTCTCCC/CTCTCCCTCTCCCTCTCCC	CTCTCCCTCTCCCTCTCCC/CTCTCCCTCTCCCTCTCCC	CTCTCCCTCTCCCTCTCCC/CTCTCCCTCTCCCTCTCCC
[truncated: 8 more rows]
[truncated: 12 more columns]
